# Supplementary material for: Kidins220 regulates the development of B cells bearing the λ light chain
Source: eLife. 2024 Jan 25;13:e83943. doi: 10.7554/eLife.83943 (PMC10810608; doi:10.7554/eLife.83943)
Supplement: Figure 1—source data 1. [file elife-83943-fig1-data1.xlsx]

## Sheet: Figure1A
CTRL	B-KO
2.56	0.41
2.72	0.45
2.64	0.72
2.58	0.39
3.55	1.03
4.38	1.58
2.84	1.21
3.72	1.32
	1.68
4.88	0.83
3.52	0.88
4.31	0.85
Unpaired t test
P value	<0,0001
P value summary	****
Significantly different (P < 0.05)?	Yes
One- or two-tailed P value?	Two-tailed
t, df	t=9,121, df=21

## Sheet: HC
	clonotype_id	chain	c_gene	chain1	v_gene	d_gene	j_gene	cdr3	status	v_count	v_freq	d_count	d_freq	j_count	j_freq
1	clonotype1000	IGH	IGHM	Hc	IGHV1-58	None	IGHJ3	CAREETYGSDFAYW	ko	15	0.810811	1642	88.7568	448	24.2162		All codes and analysis parameters would be provided upon rasonable request
2	clonotype1001	IGH	IGHM	Hc	IGHV1-26	None	IGHJ4	CARGLGWYAMDYW	ko	130	7.02703	1642	88.7568	634	34.2703
3	clonotype1003	IGH	IGHM	Hc	IGHV5-4	None	IGHJ3	CARDDPFAYW	ko	23	1.24324	1642	88.7568	448	24.2162
4	clonotype1004	IGH	IGHM	Hc	IGHV1-22	None	IGHJ3	CARLWLLPAYW	ko	38	2.05405	1642	88.7568	448	24.2162
5	clonotype1005	IGH	IGHM	Hc	IGHV8-8	IGHD1-1	IGHJ1	CARAYITTVVARYFDVW	ko	78	4.21622	150	8.10811	270	14.5946
6	clonotype1006	IGH	IGHM	Hc	IGHV1-19	None	IGHJ4	CARPYGYDPYYYAMDYW	ko	49	2.64865	1642	88.7568	634	34.2703
7	clonotype1007	IGH	IGHM	Hc	IGHV1-82	None	IGHJ4	CARRGLYYYAMDYW	ko	21	1.13514	1642	88.7568	634	34.2703
8	clonotype1008	IGH	IGHM	Hc	IGHV3-3	None	IGHJ1	CARCSSYGYFDVW	ko	5	0.27027	1642	88.7568	270	14.5946
9	clonotype1009	IGH	None	Hc	IGHV1-47	None	IGHJ3	CARGNYDYGTLAYW	ko	8	0.432432	1642	88.7568	448	24.2162
10	clonotype1010	IGH	IGHM	Hc	IGHV14-3	None	IGHJ3	CAPDGNPFAYW	ko	7	0.378378	1642	88.7568	448	24.2162
11	clonotype1011	IGH	None	Hc	IGHV1-39	None	IGHJ2	CARWDYGSSSYYFDYW	ko	39	2.10811	1642	88.7568	498	26.9189
12	clonotype1012	IGH	IGHM	Hc	IGHV1-26	IGHD1-1	IGHJ1	CVHYYGSSFYWYFDVW	ko	130	7.02703	150	8.10811	270	14.5946
13	clonotype1014	IGH	IGHM	Hc	IGHV1-81	None	IGHJ3	CARWLLRAWFAYW	ko	39	2.10811	1642	88.7568	448	24.2162
14	clonotype1015	IGH	None	Hc	IGHV1-26	None	IGHJ2	CARWLPLDYW	ko	130	7.02703	1642	88.7568	498	26.9189
15	clonotype1016	IGH	IGHM	Hc	IGHV1-80	IGHD1-1	IGHJ2	CARSRVYYGSSYFDYW	ko	14	0.756757	150	8.10811	498	26.9189
16	clonotype1017	IGH	IGHM	Hc	IGHV1-81	None	IGHJ4	CARCDYDRDYAMDYW	ko	39	2.10811	1642	88.7568	634	34.2703
17	clonotype1018	IGH	IGHM	Hc	IGHV1-26	None	IGHJ2	CARSHYYGPEGYYFDYW	ko	130	7.02703	1642	88.7568	498	26.9189
18	clonotype1021	IGH	IGHM	Hc	IGHV1-19	None	IGHJ4	CAREGEYGNYFYAMDYW	ko	49	2.64865	1642	88.7568	634	34.2703
19	clonotype1022	IGH	IGHM	Hc	IGHV10-3	None	IGHJ3	CVRDLWGGIAYW	ko	33	1.78378	1642	88.7568	448	24.2162
20	clonotype1023	IGH	IGHM	Hc	IGHV7-3	None	IGHJ3	CVGGIYYDYEAWFAYW	ko	27	1.45946	1642	88.7568	448	24.2162
21	clonotype1024	IGH	IGHM	Hc	IGHV1-26	IGHD1-1	IGHJ4	CALITTVVARNAMDYW	ko	130	7.02703	150	8.10811	634	34.2703
22	clonotype1025	IGH	IGHM	Hc	IGHV1-39	None	IGHJ1	CARRSNYLYWYFDVW	ko	39	2.10811	1642	88.7568	270	14.5946
23	clonotype1026	IGH	IGHM	Hc	IGHV4-1	IGHD2-3	IGHJ1	CARQSIYDGYYWYFDVW	ko	41	2.21622	7	0.378378	270	14.5946
24	clonotype1027	IGH	IGHM	Hc	IGHV8-12	None	IGHJ3	CARIYDGYYAWFAYW	ko	38	2.05405	1642	88.7568	448	24.2162
25	clonotype1028	IGH	IGHM	Hc	IGHV1-82	None	IGHJ4	CARDDGYLPGSYAMDYW	ko	21	1.13514	1642	88.7568	634	34.2703
26	clonotype1029	IGH	IGHM	Hc	IGHV1-26	None	IGHJ1	CARRNFVYYYGHWYFDVW	ko	130	7.02703	1642	88.7568	270	14.5946
27	clonotype1031	IGH	IGHM	Hc	IGHV6-6	None	IGHJ3	CTAYYSNPFAYW	ko	25	1.35135	1642	88.7568	448	24.2162
28	clonotype1032	IGH	IGHM	Hc	IGHV7-3	None	IGHJ4	CARSPYYSNPYYYAMDYW	ko	27	1.45946	1642	88.7568	634	34.2703
29	clonotype1033	IGH	IGHM	Hc	IGHV1-22	None	IGHJ2	CARANWVPW	ko	38	2.05405	1642	88.7568	498	26.9189
30	clonotype1034	IGH	IGHM	Hc	IGHV1-66	IGHD2-8	IGHJ2	CARGGIYYGNYRESWFDYW	ko	6	0.324324	5	0.27027	498	26.9189
31	clonotype1035	IGH	IGHM	Hc	IGHV5-17	None	IGHJ3	CARPGYDGYYVGFAYW	ko	17	0.918919	1642	88.7568	448	24.2162
32	clonotype1037	IGH	IGHM	Hc	IGHV1-55	None	IGHJ2	CARNYGSPDYW	ko	14	0.756757	1642	88.7568	498	26.9189
33	clonotype1038	IGH	IGHM	Hc	IGHV1-19	None	IGHJ4	CARRLLIYYDYGYAMDYW	ko	49	2.64865	1642	88.7568	634	34.2703
34	clonotype1039	IGH	IGHM	Hc	IGHV2-6	None	IGHJ4	CARHYDYEDYAMDYW	ko	12	0.648649	1642	88.7568	634	34.2703
35	clonotype1040	IGH	None	Hc	IGHV2-9-1	None	IGHJ4	CARNLRYAMDYW	ko	21	1.13514	1642	88.7568	634	34.2703
36	clonotype1041	IGH	IGHM	Hc	IGHV6-3	None	IGHJ3	CTAYWAYW	ko	82	4.43243	1642	88.7568	448	24.2162
37	clonotype1042	IGH	IGHM	Hc	IGHV1-22	IGHD1-1	IGHJ3	CALYYYGSSSFAYW	ko	38	2.05405	150	8.10811	448	24.2162
38	clonotype1043	IGH	IGHM	Hc	IGHV5-16	IGHD1-1	IGHJ2	CAREGDYYGSSYFDYW	ko	29	1.56757	150	8.10811	498	26.9189
39	clonotype1044	IGH	IGHM	Hc	IGHV2-2	None	IGHJ2	CARSGRGSFDYW	ko	48	2.59459	1642	88.7568	498	26.9189
40	clonotype1046	IGH	None	Hc	IGHV1-81	None	IGHJ3	CARDAAYW	ko	39	2.10811	1642	88.7568	448	24.2162
41	clonotype1047	IGH	IGHM	Hc	IGHV1-64	None	IGHJ2	CARNSVVALDYW	ko	36	1.94595	1642	88.7568	498	26.9189
42	clonotype1048	IGH	IGHM	Hc	IGHV9-1	None	IGHJ4	CVRNSDAMDYW	ko	18	0.972973	1642	88.7568	634	34.2703
43	clonotype1050	IGH	IGHM	Hc	IGHV2-2	None	IGHJ1	CAREGGNYTGNWYFDVW	ko	48	2.59459	1642	88.7568	270	14.5946
44	clonotype1052	IGH	IGHM	Hc	IGHV1-26	None	IGHJ3	CARGNYSPWFAYW	ko	130	7.02703	1642	88.7568	448	24.2162
45	clonotype1054	IGH	IGHM	Hc	IGHV9-1	IGHD2-5	IGHJ3	CVRETYYSNYEAWFAYW	ko	18	0.972973	12	0.648649	448	24.2162
46	clonotype1057	IGH	IGHM	Hc	IGHV2-5	None	IGHJ4	CAKNELGLDYAMDYW	ko	16	0.864865	1642	88.7568	634	34.2703
47	clonotype1058	IGH	IGHM	Hc	IGHV6-6	None	IGHJ4	CTRLGSSLYAMDYW	ko	25	1.35135	1642	88.7568	634	34.2703
48	clonotype1059	IGH	None	Hc	IGHV1-18	IGHD1-1	IGHJ2	CARSPYYYGSSLYYFDYW	ko	47	2.54054	150	8.10811	498	26.9189
49	clonotype1060	IGH	IGHM	Hc	IGHV8-12	IGHD1-1	IGHJ1	CARRAHYYGSSYGWYFDVW	ko	38	2.05405	150	8.10811	270	14.5946
50	clonotype1061	IGH	IGHM	Hc	IGHV1-84	IGHD1-1	IGHJ2	CASSLIYYYGSSWDYW	ko	10	0.540541	150	8.10811	498	26.9189
51	clonotype1062	IGH	IGHM	Hc	IGHV7-3	None	IGHJ4	CARYNGSSHYAMDYW	ko	27	1.45946	1642	88.7568	634	34.2703
52	clonotype1063	IGH	IGHM	Hc	IGHV1-53	None	IGHJ4	CARSLSYAMDYW	ko	29	1.56757	1642	88.7568	634	34.2703
53	clonotype1064	IGH	IGHM	Hc	IGHV9-3	None	IGHJ4	CAREDFRYDGYYDYAMDYW	ko	89	4.81081	1642	88.7568	634	34.2703
54	clonotype1065	IGH	IGHM	Hc	IGHV3-6	None	IGHJ1	CARGGWLPWYFDVW	ko	135	7.2973	1642	88.7568	270	14.5946
55	clonotype1066	IGH	IGHM	Hc	IGHV8-8	None	IGHJ3	CARMRGGWLRFAYW	ko	78	4.21622	1642	88.7568	448	24.2162
56	clonotype1067	IGH	IGHM	Hc	IGHV1-55	None	IGHJ2	CAREDGYYRGSYW	ko	14	0.756757	1642	88.7568	498	26.9189
57	clonotype1069	IGH	IGHM	Hc	IGHV8-8	None	IGHJ3	CARDYYGSSPWFAYW	ko	78	4.21622	1642	88.7568	448	24.2162
58	clonotype1071	IGH	IGHM	Hc	IGHV4-1	None	IGHJ4	CASDGYYDAMDYR	ko	41	2.21622	1642	88.7568	634	34.2703
59	clonotype1072	IGH	IGHM	Hc	IGHV13-2	None	IGHJ4	CSRSTVAYYYAMDYW	ko	18	0.972973	1642	88.7568	634	34.2703
60	clonotype1074	IGH	IGHM	Hc	IGHV1-26	None	IGHJ3	CARRDYGSSWFAYW	ko	130	7.02703	1642	88.7568	448	24.2162
61	clonotype1075	IGH	IGHM	Hc	IGHV10-3	None	IGHJ3	CVRDDGDGYYPFAYW	ko	33	1.78378	1642	88.7568	448	24.2162
62	clonotype1076	IGH	IGHM	Hc	IGHV2-9-1	None	IGHJ3	CARMDYGNYRFAYW	ko	21	1.13514	1642	88.7568	448	24.2162
63	clonotype1077	IGH	IGHM	Hc	IGHV10-3	IGHD1-1	IGHJ4	CVREGSITTVVAPYAMDYW	ko	33	1.78378	150	8.10811	634	34.2703
64	clonotype1078	IGH	IGHM	Hc	IGHV14-4	None	IGHJ2	CTTSGYGDFDYW	ko	24	1.2973	1642	88.7568	498	26.9189
65	clonotype1079	IGH	IGHM	Hc	IGHV1-36	IGHD3-2	IGHJ3	CAKDSSGYKFAYW	ko	8	0.432432	9	0.486486	448	24.2162
66	clonotype1080	IGH	IGHM	Hc	IGHV5-9	None	IGHJ2	CARGDYYGSSLYFDYW	ko	7	0.378378	1642	88.7568	498	26.9189
67	clonotype1081	IGH	IGHM	Hc	IGHV1-81	None	IGHJ2	CARWGYYGSSYFDYW	ko	39	2.10811	1642	88.7568	498	26.9189
68	clonotype1082	IGH	IGHM	Hc	IGHV1-61	None	IGHJ3	CARGGDYDTWFAYW	ko	5	0.27027	1642	88.7568	448	24.2162
69	clonotype1083	IGH	IGHM	Hc	IGHV9-3	None	IGHJ2	CARRGLLPHYFDYW	ko	89	4.81081	1642	88.7568	498	26.9189
70	clonotype1084	IGH	IGHM	Hc	IGHV6-3	None	IGHJ4	CTGISMDYW	ko	82	4.43243	1642	88.7568	634	34.2703
71	clonotype1085	IGH	IGHM	Hc	IGHV1-82	None	IGHJ2	CATDYDYDREFFYFDYW	ko	21	1.13514	1642	88.7568	498	26.9189
72	clonotype1087	IGH	IGHM	Hc	IGHV1-22	None	IGHJ2	CARNGYEGFDYW	ko	38	2.05405	1642	88.7568	498	26.9189
73	clonotype1088	IGH	IGHM	Hc	IGHV9-3	None	IGHJ4	CARKAGSSLYYYAMDYW	ko	89	4.81081	1642	88.7568	634	34.2703
74	clonotype1089	IGH	IGHM	Hc	IGHV9-3	None	IGHJ3	CARALYGNYW	ko	89	4.81081	1642	88.7568	448	24.2162
75	clonotype1090	IGH	IGHM	Hc	IGHV1-81	None	IGHJ1	CARSSGNYWYFDVW	ko	39	2.10811	1642	88.7568	270	14.5946
76	clonotype1091	IGH	IGHM	Hc	IGHV8-8	IGHD1-1	IGHJ2	CARISNYYGSSSFDYW	ko	78	4.21622	150	8.10811	498	26.9189
77	clonotype1092	IGH	IGHM	Hc	IGHV1-19	None	IGHJ1	CARRYYGSSWYFDVW	ko	49	2.64865	1642	88.7568	270	14.5946
78	clonotype1093	IGH	IGHM	Hc	IGHV1-81	None	IGHJ3	CARWFAYW	ko	39	2.10811	1642	88.7568	448	24.2162
79	clonotype1094	IGH	IGHM	Hc	IGHV1-15	None	IGHJ3	CTREGITTVVPFAYW	ko	15	0.810811	1642	88.7568	448	24.2162
80	clonotype1095	IGH	IGHM	Hc	IGHV2-9-1	None	IGHJ4	CAKFYGNYAMDYW	ko	21	1.13514	1642	88.7568	634	34.2703
81	clonotype1096	IGH	IGHM	Hc	IGHV2-2	None	IGHJ1	CARNSLSYFDVW	ko	48	2.59459	1642	88.7568	270	14.5946
82	clonotype1097	IGH	IGHM	Hc	IGHV1-82	None	IGHJ1	CARKGYYGSRDWYFDVW	ko	21	1.13514	1642	88.7568	270	14.5946
83	clonotype1098	IGH	IGHM	Hc	IGHV1-81	None	IGHJ3	CANYSPWFAYW	ko	39	2.10811	1642	88.7568	448	24.2162
84	clonotype1099	IGH	IGHM	Hc	IGHV1-42	None	IGHJ4	CARAGGDDYDEGYYYAMDYW	ko	15	0.810811	1642	88.7568	634	34.2703
85	clonotype1101	IGH	IGHM	Hc	IGHV9-4	None	IGHJ4	CARYGNYFYYAMDYW	ko	17	0.918919	1642	88.7568	634	34.2703
86	clonotype1102	IGH	IGHM	Hc	IGHV2-3	None	IGHJ3	CAKLRPGSGYAYW	ko	16	0.864865	1642	88.7568	448	24.2162
87	clonotype1103	IGH	None	Hc	IGHV1-76	None	IGHJ3	CARSGVPYPSYW	ko	13	0.702703	1642	88.7568	448	24.2162
88	clonotype1105	IGH	IGHM	Hc	IGHV1-64	None	IGHJ4	CARGRLYAMDYW	ko	36	1.94595	1642	88.7568	634	34.2703
89	clonotype1106	IGH	IGHM	Hc	IGHV1-53	None	IGHJ2	CARDSSGVFDYW	ko	29	1.56757	1642	88.7568	498	26.9189
90	clonotype1107	IGH	IGHM	Hc	IGHV1-75	IGHD1-1	IGHJ2	CARWGYYGSSYVFDYW	ko	36	1.94595	150	8.10811	498	26.9189
91	clonotype1108	IGH	IGHM	Hc	IGHV8-8	IGHD1-1	IGHJ1	CARIDYYGSSYWYFDVW	ko	78	4.21622	150	8.10811	270	14.5946
92	clonotype1109	IGH	IGHM	Hc	IGHV4-1	None	IGHJ1	CARRDGYPYWYFDVW	ko	41	2.21622	1642	88.7568	270	14.5946
93	clonotype1111	IGH	IGHM	Hc	IGHV9-3	None	IGHJ2	CARDDYDLHYFAYG	ko	89	4.81081	1642	88.7568	498	26.9189
94	clonotype1112	IGH	IGHM	Hc	IGHV1-64	IGHD1-1	IGHJ3	CASPITTVVATDYW	ko	36	1.94595	150	8.10811	448	24.2162
95	clonotype1114	IGH	None	Hc	IGHV1-36	None	IGHJ2	CAIGGLRLFDYW	ko	8	0.432432	1642	88.7568	498	26.9189
96	clonotype1116	IGH	IGHM	Hc	IGHV7-1	None	IGHJ1	CARDTWHYGSSYWYFDVW	ko	22	1.18919	1642	88.7568	270	14.5946
97	clonotype1117	IGH	None	Hc	IGHV1-39	None	IGHJ4	CASYDGYW	ko	39	2.10811	1642	88.7568	634	34.2703
98	clonotype1118	IGH	IGHM	Hc	IGHV1-26	None	IGHJ2	CARSGGVWYQNYW	ko	130	7.02703	1642	88.7568	498	26.9189
99	clonotype1122	IGH	IGHM	Hc	IGHV1-26	None	IGHJ1	CARNGSSYDWYFDVW	ko	130	7.02703	1642	88.7568	270	14.5946
100	clonotype1123	IGH	IGHM	Hc	IGHV1-26	None	IGHJ3	CARSYGSRPAWFAYW	ko	130	7.02703	1642	88.7568	448	24.2162
101	clonotype1124	IGH	IGHM	Hc	IGHV8-12	None	IGHJ3	CARNSPLYDYLFAYW	ko	38	2.05405	1642	88.7568	448	24.2162
102	clonotype1125	IGH	IGHM	Hc	IGHV1-72	None	IGHJ3	CAKGNGNYPAWFAYW	ko	21	1.13514	1642	88.7568	448	24.2162
103	clonotype1126	IGH	IGHM	Hc	IGHV9-3	None	IGHJ2	CARGTTVVATSDYW	ko	89	4.81081	1642	88.7568	498	26.9189
104	clonotype1128	IGH	IGHM	Hc	IGHV1-81	None	IGHJ4	CARSDPDAMDYW	ko	39	2.10811	1642	88.7568	634	34.2703
105	clonotype1130	IGH	None	Hc	IGHV1-18	None	IGHJ4	CARRIHYGSSYDYAMDYW	ko	47	2.54054	1642	88.7568	634	34.2703
106	clonotype1131	IGH	IGHM	Hc	IGHV2-9-1	IGHD1-1	IGHJ4	CARGYYYGSSSYAMDYW	ko	21	1.13514	150	8.10811	634	34.2703
107	clonotype1132	IGH	IGHM	Hc	IGHV8-8	None	IGHJ3	CARMRYYGTWFAYW	ko	78	4.21622	1642	88.7568	448	24.2162
108	clonotype1133	IGH	IGHM	Hc	IGHV1-18	IGHD1-1	IGHJ1	CWALFFYYYGSSSTPGYWYFDVW	ko	47	2.54054	150	8.10811	270	14.5946
109	clonotype1134	IGH	IGHM	Hc	IGHV5-12	None	IGHJ4	CARQEDDYDGAMDYW	ko	10	0.540541	1642	88.7568	634	34.2703
110	clonotype1135	IGH	IGHM	Hc	IGHV1-75	None	IGHJ1	CAREGYYGSSYWYFDVW	ko	36	1.94595	1642	88.7568	270	14.5946
111	clonotype1139	IGH	IGHM	Hc	IGHV8-4	None	IGHJ4	CAQSARYEGAMDYW	ko	3	0.162162	1642	88.7568	634	34.2703
112	clonotype1140	IGH	IGHM	Hc	IGHV13-2	None	IGHJ2	CSREGGLRRGGYYFDYW	ko	18	0.972973	1642	88.7568	498	26.9189
113	clonotype1141	IGH	IGHM	Hc	IGHV2-2	None	IGHJ1	CARNWVTTTYFDVW	ko	48	2.59459	1642	88.7568	270	14.5946
114	clonotype1142	IGH	IGHM	Hc	IGHV4-1	None	IGHJ4	CARGYGSSYFYAMDYW	ko	41	2.21622	1642	88.7568	634	34.2703
115	clonotype1144	IGH	IGHM	Hc	IGHV14-3	IGHD2-5	IGHJ1	CARSYYSNYIDVW	ko	7	0.378378	12	0.648649	270	14.5946
116	clonotype1145	IGH	IGHM	Hc	IGHV1-5	None	IGHJ4	CTREEVFYYAMDYW	ko	31	1.67568	1642	88.7568	634	34.2703
117	clonotype1146	IGH	IGHM	Hc	IGHV1-75	None	IGHJ4	CARWGFYYPMDYW	ko	36	1.94595	1642	88.7568	634	34.2703
118	clonotype1147	IGH	IGHM	Hc	IGHV3-6	None	IGHJ1	CATYGSSFWYFDVW	ko	135	7.2973	1642	88.7568	270	14.5946
119	clonotype1148	IGH	IGHM	Hc	IGHV1-22	None	IGHJ2	CASTPITTEDYFDYW	ko	38	2.05405	1642	88.7568	498	26.9189
120	clonotype1149	IGH	IGHM	Hc	IGHV1-39	None	IGHJ3	CGYDGYYGWFAYW	ko	39	2.10811	1642	88.7568	448	24.2162
121	clonotype1150	IGH	IGHM	Hc	IGHV7-4	None	IGHJ4	CVKAVNGYDEDYAMDYW	ko	1	0.0540541	1642	88.7568	634	34.2703
122	clonotype1152	IGH	None	Hc	IGHV1-26	None	IGHJ3	CASEDYSTEGFAYW	ko	130	7.02703	1642	88.7568	448	24.2162
123	clonotype1154	IGH	IGHM	Hc	IGHV1-52	IGHD1-1	IGHJ2	CARRAYYGSSYFDYW	ko	6	0.324324	150	8.10811	498	26.9189
124	clonotype1157	IGH	IGHM	Hc	IGHV7-3	None	IGHJ2	CARIPPHYYGSTSYFDYW	ko	27	1.45946	1642	88.7568	498	26.9189
125	clonotype1158	IGH	IGHM	Hc	IGHV2-5	None	IGHJ2	CARSPLYYGYFDYW	ko	16	0.864865	1642	88.7568	498	26.9189
126	clonotype1159	IGH	None	Hc	IGHV1-81	None	IGHJ3	CARNGYPFAYW	ko	39	2.10811	1642	88.7568	448	24.2162
127	clonotype1160	IGH	IGHM	Hc	IGHV1-71	None	IGHJ3	CARHGQGYYGSSPWFAYW	ko	11	0.594595	1642	88.7568	448	24.2162
128	clonotype1161	IGH	IGHM	Hc	IGHV1-75	IGHD1-1	IGHJ4	CPYYYGSSSGYAMDYW	ko	36	1.94595	150	8.10811	634	34.2703
129	clonotype1164	IGH	IGHM	Hc	IGHV1-26	None	IGHJ3	CARGEPSWFAYW	ko	130	7.02703	1642	88.7568	448	24.2162
130	clonotype1165	IGH	IGHM	Hc	IGHV1-75	None	IGHJ4	CARGYYDYALYYAMDYW	ko	36	1.94595	1642	88.7568	634	34.2703
131	clonotype1166	IGH	IGHM	Hc	IGHV1-34	None	IGHJ2	CARGSWGWLLWDFDYW	ko	5	0.27027	1642	88.7568	498	26.9189
132	clonotype1167	IGH	IGHM	Hc	IGHV5-4	None	IGHJ3	CARERDGYSWFAYW	ko	23	1.24324	1642	88.7568	448	24.2162
133	clonotype1169	IGH	IGHM	Hc	IGHV1-26	None	IGHJ4	CARVGLGYYYGSRRGYAMDYW	ko	130	7.02703	1642	88.7568	634	34.2703
134	clonotype1170	IGH	IGHM	Hc	IGHV1-22	None	IGHJ2	CARDDGYYGLGRYFDYW	ko	38	2.05405	1642	88.7568	498	26.9189
135	clonotype1171	IGH	IGHM	Hc	IGHV1-5	None	IGHJ1	CAYSNKYFDVW	ko	31	1.67568	1642	88.7568	270	14.5946
136	clonotype1172	IGH	IGHM	Hc	IGHV1-42	None	IGHJ1	CASSSSPPTEYFDVW	ko	15	0.810811	1642	88.7568	270	14.5946
137	clonotype1174	IGH	IGHM	Hc	IGHV1-76	None	IGHJ2	CARFPMGDYDVDYW	ko	13	0.702703	1642	88.7568	498	26.9189
138	clonotype1177	IGH	IGHM	Hc	IGHV1-9	None	IGHJ3	CARWGLRGIWFAYW	ko	27	1.45946	1642	88.7568	448	24.2162
139	clonotype1178	IGH	IGHM	Hc	IGHV6-3	IGHD1-1	IGHJ3	CTGPLYYYGSSPWFAYW	ko	82	4.43243	150	8.10811	448	24.2162
140	clonotype1179	IGH	IGHM	Hc	IGHV1-22	IGHD1-1	IGHJ1	CARGIYYGSSYWYFDVW	ko	38	2.05405	150	8.10811	270	14.5946
141	clonotype1181	IGH	IGHM	Hc	IGHV5-4	None	IGHJ2	CARDDGYSYYFDYW	ko	23	1.24324	1642	88.7568	498	26.9189
142	clonotype1182	IGH	IGHM	Hc	IGHV2-2	None	IGHJ4	CARNPSMVTTWAMDYW	ko	48	2.59459	1642	88.7568	634	34.2703
143	clonotype1183	IGH	IGHM	Hc	IGHV5-6	IGHD2-4	IGHJ3	CARHTLYYDYDVFAYW	ko	19	1.02703	18	0.972973	448	24.2162
144	clonotype1184	IGH	IGHM	Hc	IGHV8-8	None	IGHJ2	CARIAKPLTSPITTVVFDYW	ko	78	4.21622	1642	88.7568	498	26.9189
145	clonotype1186	IGH	IGHM	Hc	IGHV1-22	None	IGHJ2	CARPIYDGYSLDYW	ko	38	2.05405	1642	88.7568	498	26.9189
146	clonotype1187	IGH	IGHM	Hc	IGHV3-6	IGHD1-1	IGHJ4	CANIYYGSSYEDAMDYW	ko	135	7.2973	150	8.10811	634	34.2703
147	clonotype1188	IGH	IGHM	Hc	IGHV3-6	None	IGHJ3	CARDSDDGYYRAWFAYW	ko	135	7.2973	1642	88.7568	448	24.2162
148	clonotype1189	IGH	IGHM	Hc	IGHV3-6	None	IGHJ4	CARDVYYSNPYAMDYW	ko	135	7.2973	1642	88.7568	634	34.2703
149	clonotype1190	IGH	IGHM	Hc	IGHV5-12	None	IGHJ2	CARQGYYGYFDYW	ko	10	0.540541	1642	88.7568	498	26.9189
150	clonotype1191	IGH	IGHM	Hc	IGHV1-39	None	IGHJ4	CATPTTVVASSDAMDYW	ko	39	2.10811	1642	88.7568	634	34.2703
151	clonotype1192	IGH	IGHM	Hc	IGHV8-8	None	IGHJ4	CARMSYYGSIAMDYW	ko	78	4.21622	1642	88.7568	634	34.2703
152	clonotype1193	IGH	IGHM	Hc	IGHV5-17	None	IGHJ4	CARDGNPAMDYW	ko	17	0.918919	1642	88.7568	634	34.2703
153	clonotype1194	IGH	IGHM	Hc	IGHV1-69	None	IGHJ1	CAREGGVHYGSSYWYFDVW	ko	15	0.810811	1642	88.7568	270	14.5946
154	clonotype1195	IGH	IGHM	Hc	IGHV1-55	None	IGHJ4	CARPTVVAYYYAMDYW	ko	14	0.756757	1642	88.7568	634	34.2703
155	clonotype1196	IGH	IGHM	Hc	IGHV9-4	None	IGHJ4	CARDGPHAMDYW	ko	17	0.918919	1642	88.7568	634	34.2703
156	clonotype1198	IGH	IGHM	Hc	IGHV1-26	IGHD1-1	IGHJ2	CARRGDYYGSSYYFDYW	ko	130	7.02703	150	8.10811	498	26.9189
157	clonotype1199	IGH	IGHM	Hc	IGHV3-6	None	IGHJ1	CARDYGSSYWYFDVW	ko	135	7.2973	1642	88.7568	270	14.5946
158	clonotype1201	IGH	IGHM	Hc	IGHV1-9	None	IGHJ4	CARGVIVSYYYAMDYW	ko	27	1.45946	1642	88.7568	634	34.2703
159	clonotype1202	IGH	IGHM	Hc	IGHV1-64	IGHD1-1	IGHJ4	CARVGIYYYGSSLYYYAMDYW	ko	36	1.94595	150	8.10811	634	34.2703
160	clonotype1203	IGH	IGHM	Hc	IGHV1-9	None	IGHJ2	CARSGLELRYYFDYW	ko	27	1.45946	1642	88.7568	498	26.9189
161	clonotype1204	IGH	IGHM	Hc	IGHV5-16	None	IGHJ1	CARAYGSSYWYFDVW	ko	29	1.56757	1642	88.7568	270	14.5946
162	clonotype1206	IGH	IGHM	Hc	IGHV1-81	None	IGHJ3	CARDYDYGAWFAYW	ko	39	2.10811	1642	88.7568	448	24.2162
163	clonotype1209	IGH	IGHM	Hc	IGHV1-81	IGHD1-1	IGHJ2	CARWGFDYYGSSPLDYW	ko	39	2.10811	150	8.10811	498	26.9189
164	clonotype1210	IGH	IGHM	Hc	IGHV2-2	None	IGHJ4	CAGPMDYW	ko	48	2.59459	1642	88.7568	634	34.2703
165	clonotype1211	IGH	IGHM	Hc	IGHV1-15	None	IGHJ2	CTRSRDLLYYFDYW	ko	15	0.810811	1642	88.7568	498	26.9189
166	clonotype1212	IGH	IGHM	Hc	IGHV9-3	None	IGHJ2	CARGGYYDYDEDYW	ko	89	4.81081	1642	88.7568	498	26.9189
167	clonotype1214	IGH	IGHM	Hc	IGHV7-1	None	IGHJ3	CARHSNYGWFAYW	ko	22	1.18919	1642	88.7568	448	24.2162
168	clonotype1216	IGH	IGHM	Hc	IGHV3-6	None	IGHJ2	CARGFITTVPYYFDYW	ko	135	7.2973	1642	88.7568	498	26.9189
169	clonotype1220	IGH	IGHM	Hc	IGHV1-72	None	IGHJ1	CARGRGYFDVW	ko	21	1.13514	1642	88.7568	270	14.5946
170	clonotype1223	IGH	IGHM	Hc	IGHV1-72	None	IGHJ4	CARETTTVLDYW	ko	21	1.13514	1642	88.7568	634	34.2703
171	clonotype1224	IGH	IGHM	Hc	IGHV6-6	None	IGHJ3	CTSYDYGLFAYW	ko	25	1.35135	1642	88.7568	448	24.2162
172	clonotype1225	IGH	IGHM	Hc	IGHV9-3	None	IGHJ1	CARSIYDVW	ko	89	4.81081	1642	88.7568	270	14.5946
173	clonotype1226	IGH	IGHM	Hc	IGHV1-9	IGHD1-1	IGHJ4	CARGRVYYYGSSPPYYYAMDYW	ko	27	1.45946	150	8.10811	634	34.2703
174	clonotype1228	IGH	IGHM	Hc	IGHV5-12	IGHD1-1	IGHJ1	CARPPIYYYGSSYNFDVW	ko	10	0.540541	150	8.10811	270	14.5946
175	clonotype1229	IGH	IGHM	Hc	IGHV5-9-1	None	IGHJ3	CTKSAWFAYW	ko	12	0.648649	1642	88.7568	448	24.2162
176	clonotype1230	IGH	IGHM	Hc	IGHV1-62-2	None	IGHJ4	CARHEEGIYYYGSPTIYYAMDYW	ko	16	0.864865	1642	88.7568	634	34.2703
177	clonotype1231	IGH	IGHM	Hc	IGHV8-12	None	IGHJ4	CARRDDYGYAMDYW	ko	38	2.05405	1642	88.7568	634	34.2703
178	clonotype1232	IGH	IGHM	Hc	IGHV1-18	None	IGHJ4	CARGNYGSTYAMDYW	ko	47	2.54054	1642	88.7568	634	34.2703
179	clonotype1233	IGH	IGHM	Hc	IGHV14-2	None	IGHJ4	CAREGLGLGRRYYAMDYW	ko	14	0.756757	1642	88.7568	634	34.2703
180	clonotype1235	IGH	IGHM	Hc	IGHV14-1	None	IGHJ4	CTTQTQSHDYYAMDYW	ko	3	0.162162	1642	88.7568	634	34.2703
181	clonotype1237	IGH	IGHM	Hc	IGHV1-26	None	IGHJ4	CARSAYYDYDGEYYYAMDYW	ko	130	7.02703	1642	88.7568	634	34.2703
182	clonotype1239	IGH	IGHM	Hc	IGHV1-75	IGHD1-1	IGHJ2	CARGGKGYYGSSYYYFDYW	ko	36	1.94595	150	8.10811	498	26.9189
183	clonotype1240	IGH	None	Hc	IGHV9-4	None	IGHJ4	CARDFFYAMDYW	ko	17	0.918919	1642	88.7568	634	34.2703
184	clonotype1241	IGH	IGHM	Hc	IGHV1-19	None	IGHJ4	CARAVPLGGDYW	ko	49	2.64865	1642	88.7568	634	34.2703
185	clonotype1242	IGH	IGHM	Hc	IGHV6-3	None	IGHJ3	CKIYYDYEGFAYW	ko	82	4.43243	1642	88.7568	448	24.2162
186	clonotype1243	IGH	IGHM	Hc	IGHV13-2	None	IGHJ4	CSREDYGSPPYAMDYW	ko	18	0.972973	1642	88.7568	634	34.2703
187	clonotype1244	IGH	IGHM	Hc	IGHV4-1	None	IGHJ3	CASPLLLRYGGFAYW	ko	41	2.21622	1642	88.7568	448	24.2162
188	clonotype1245	IGH	IGHM	Hc	IGHV2-3	None	IGHJ2	CAKGEGNSYYVDYW	ko	16	0.864865	1642	88.7568	498	26.9189
189	clonotype1246	IGH	IGHM	Hc	IGHV1-81	None	IGHJ2	CARGNYADYW	ko	39	2.10811	1642	88.7568	498	26.9189
190	clonotype1248	IGH	IGHM	Hc	IGHV8-8	None	IGHJ4	CARIAKGLRESHYYAMDYW	ko	78	4.21622	1642	88.7568	634	34.2703
191	clonotype1249	IGH	IGHM	Hc	IGHV1-53	None	IGHJ3	CARSHSSFAYW	ko	29	1.56757	1642	88.7568	448	24.2162
192	clonotype1250	IGH	IGHM	Hc	IGHV7-1	None	IGHJ4	CARGSLLRMDYW	ko	22	1.18919	1642	88.7568	634	34.2703
193	clonotype1251	IGH	IGHM	Hc	IGHV5-6	None	IGHJ4	CARPGDGYHYYAMDYW	ko	19	1.02703	1642	88.7568	634	34.2703
194	clonotype1252	IGH	IGHM	Hc	IGHV1-22	None	IGHJ4	CAGLLPNYYAMDYW	ko	38	2.05405	1642	88.7568	634	34.2703
195	clonotype1253	IGH	IGHM	Hc	IGHV1-26	None	IGHJ3	CARGAYW	ko	130	7.02703	1642	88.7568	448	24.2162
196	clonotype1254	IGH	IGHM	Hc	IGHV5-4	None	IGHJ1	CAREGYDYDNDWYFDVW	ko	23	1.24324	1642	88.7568	270	14.5946
197	clonotype1255	IGH	None	Hc	IGHV1-9	None	IGHJ3	CARHYDYDEGFAYW	ko	27	1.45946	1642	88.7568	448	24.2162
198	clonotype1257	IGH	None	Hc	IGHV10-3	None	IGHJ3	CVREWWLLPLFAYW	ko	33	1.78378	1642	88.7568	448	24.2162
199	clonotype1258	IGH	IGHM	Hc	IGHV8-8	None	IGHJ4	CARIRGRSFMDYW	ko	78	4.21622	1642	88.7568	634	34.2703
200	clonotype1260	IGH	IGHM	Hc	IGHV13-2	None	IGHJ4	CSRSYGNYPFYAMDYW	ko	18	0.972973	1642	88.7568	634	34.2703
201	clonotype1261	IGH	IGHM	Hc	IGHV2-2	None	IGHJ4	CARKVYYSINYYAMDYW	ko	48	2.59459	1642	88.7568	634	34.2703
202	clonotype1262	IGH	IGHD	Hc	IGHV10-3	None	IGHJ2	CVREGGWDYGYFDYW	ko	33	1.78378	1642	88.7568	498	26.9189
203	clonotype1263	IGH	IGHM	Hc	IGHV1-82	IGHD1-1	IGHJ4	CARGGIYYYGSSSGDYAMDYW	ko	21	1.13514	150	8.10811	634	34.2703
204	clonotype1264	IGH	IGHM	Hc	IGHV1-75	None	IGHJ4	CARPYYDQVAMDYW	ko	36	1.94595	1642	88.7568	634	34.2703
205	clonotype1265	IGH	IGHM	Hc	IGHV1-19	IGHD2-8	IGHJ2	CARREGIYYGNYFDYW	ko	49	2.64865	5	0.27027	498	26.9189
206	clonotype1267	IGH	IGHM	Hc	IGHV5-16	None	IGHJ1	CARGGTMGWYFDVW	ko	29	1.56757	1642	88.7568	270	14.5946
207	clonotype1268	IGH	IGHM	Hc	IGHV14-4	None	IGHJ2	CTTDDYGRDFDYW	ko	24	1.2973	1642	88.7568	498	26.9189
208	clonotype1269	IGH	IGHM	Hc	IGHV1-18	None	IGHJ3	CARGVYGSSFLFAYW	ko	47	2.54054	1642	88.7568	448	24.2162
209	clonotype1271	IGH	IGHM	Hc	IGHV9-3	None	IGHJ3	CASDSSGYTWFAYW	ko	89	4.81081	1642	88.7568	448	24.2162
210	clonotype1272	IGH	IGHM	Hc	IGHV7-3	None	IGHJ3	CARYQDYSGSSTWFAYW	ko	27	1.45946	1642	88.7568	448	24.2162
211	clonotype1273	IGH	IGHM	Hc	IGHV1-75	None	IGHJ2	CARLRSYYYGSRDW	ko	36	1.94595	1642	88.7568	498	26.9189
212	clonotype1274	IGH	None	Hc	IGHV9-3	None	IGHJ3	CARGAPYGSSLAWFAYW	ko	89	4.81081	1642	88.7568	448	24.2162
213	clonotype1275	IGH	IGHM	Hc	IGHV1-76	None	IGHJ4	CARDSGVGAMDYW	ko	13	0.702703	1642	88.7568	634	34.2703
214	clonotype1276	IGH	IGHM	Hc	IGHV1-26	None	IGHJ4	CARFTTVVARYAMDYW	ko	130	7.02703	1642	88.7568	634	34.2703
215	clonotype1277	IGH	IGHM	Hc	IGHV1-64	None	IGHJ2	CAREEDSSGYFDYW	ko	36	1.94595	1642	88.7568	498	26.9189
216	clonotype1279	IGH	IGHM	Hc	IGHV8-12	None	IGHJ2	CALITTGYW	ko	38	2.05405	1642	88.7568	498	26.9189
217	clonotype1280	IGH	IGHM	Hc	IGHV3-6	None	IGHJ4	CARGGWLLHYAMDYW	ko	135	7.2973	1642	88.7568	634	34.2703
218	clonotype1281	IGH	IGHM	Hc	IGHV4-1	None	IGHJ3	CARSVGGYSFAYW	ko	41	2.21622	1642	88.7568	448	24.2162
219	clonotype1283	IGH	IGHM	Hc	IGHV14-4	None	IGHJ3	CTVYYGNSAWFAYW	ko	24	1.2973	1642	88.7568	448	24.2162
220	clonotype1284	IGH	IGHM	Hc	IGHV6-3	None	IGHJ2	CTGGDYDCFDYW	ko	82	4.43243	1642	88.7568	498	26.9189
221	clonotype1285	IGH	IGHM	Hc	IGHV5-17	None	IGHJ1	CAREDYDYFWYFDVW	ko	17	0.918919	1642	88.7568	270	14.5946
222	clonotype1286	IGH	IGHM	Hc	IGHV10-3	None	IGHJ4	CVRPIYDGYSYYAMDYW	ko	33	1.78378	1642	88.7568	634	34.2703
223	clonotype1288	IGH	IGHM	Hc	IGHV10-1	None	IGHJ4	CVRHPYYGSYAMDYW	ko	27	1.45946	1642	88.7568	634	34.2703
224	clonotype1289	IGH	IGHM	Hc	IGHV4-1	None	IGHJ1	CARGDPFDVW	ko	41	2.21622	1642	88.7568	270	14.5946
225	clonotype1291	IGH	IGHM	Hc	IGHV1-53	None	IGHJ2	CARFYDGYYGYW	ko	29	1.56757	1642	88.7568	498	26.9189
226	clonotype1292	IGH	IGHM	Hc	IGHV3-6	IGHD3-2	IGHJ3	CAREGDSSGYSAYW	ko	135	7.2973	9	0.486486	448	24.2162
227	clonotype1293	IGH	IGHM	Hc	IGHV1-54	None	IGHJ1	CARGGLLVWDFDVW	ko	15	0.810811	1642	88.7568	270	14.5946
228	clonotype1295	IGH	IGHM	Hc	IGHV10-3	None	IGHJ2	CVRDKGDSFDYW	ko	33	1.78378	1642	88.7568	498	26.9189
229	clonotype1296	IGH	IGHM	Hc	IGHV8-8	None	IGHJ2	CARIARKDYFDYW	ko	78	4.21622	1642	88.7568	498	26.9189
230	clonotype1297	IGH	IGHM	Hc	IGHV1-74	None	IGHJ3	CAIDSSGPAYW	ko	13	0.702703	1642	88.7568	448	24.2162
231	clonotype1298	IGH	IGHM	Hc	IGHV9-1	None	IGHJ1	CVRNTTVDWYFDVW	ko	18	0.972973	1642	88.7568	270	14.5946
232	clonotype1300	IGH	IGHM	Hc	IGHV1-22	None	IGHJ4	CAREPKLGRSAMDYW	ko	38	2.05405	1642	88.7568	634	34.2703
233	clonotype1302	IGH	IGHM	Hc	IGHV1-31	None	IGHJ4	CARHYGSAMDYW	ko	4	0.216216	1642	88.7568	634	34.2703
234	clonotype1303	IGH	IGHM	Hc	IGHV14-2	None	IGHJ4	CARRDYGYDNAMDYW	ko	14	0.756757	1642	88.7568	634	34.2703
235	clonotype1304	IGH	IGHM	Hc	IGHV6-6	None	IGHJ3	CLYGNYGEFAYW	ko	25	1.35135	1642	88.7568	448	24.2162
236	clonotype1305	IGH	IGHM	Hc	IGHV1-18	None	IGHJ3	CARPYYGSSPWFAYW	ko	47	2.54054	1642	88.7568	448	24.2162
237	clonotype1306	IGH	IGHM	Hc	IGHV8-12	None	IGHJ4	CARRAGNLGRLRRGGYAMDYW	ko	38	2.05405	1642	88.7568	634	34.2703
238	clonotype1307	IGH	IGHM	Hc	IGHV1-18	None	IGHJ4	CARREWDYGSSFWDYW	ko	47	2.54054	1642	88.7568	634	34.2703
239	clonotype1308	IGH	IGHM	Hc	IGHV10-1	None	IGHJ4	CVKGSIYYDYLYAMDYW	ko	27	1.45946	1642	88.7568	634	34.2703
240	clonotype1309	IGH	IGHM	Hc	IGHV1-31	None	IGHJ3	CAKDGSFAYW	ko	4	0.216216	1642	88.7568	448	24.2162
241	clonotype1310	IGH	IGHM	Hc	IGHV10-1	None	IGHJ4	CVRDRMDYW	ko	27	1.45946	1642	88.7568	634	34.2703
242	clonotype1312	IGH	IGHM	Hc	IGHV3-5	None	IGHJ1	CARDTYGSSYGYFDVW	ko	4	0.216216	1642	88.7568	270	14.5946
243	clonotype1314	IGH	IGHM	Hc	IGHV2-2	None	IGHJ2	CARMELHFDYW	ko	48	2.59459	1642	88.7568	498	26.9189
244	clonotype1315	IGH	IGHM	Hc	IGHV3-6	None	IGHJ3	CAREDDYDRRGAWFAYW	ko	135	7.2973	1642	88.7568	448	24.2162
245	clonotype1316	IGH	IGHM	Hc	IGHV1-64	IGHD1-1	IGHJ2	CARVTTVVATGDYW	ko	36	1.94595	150	8.10811	498	26.9189
246	clonotype1318	IGH	IGHM	Hc	IGHV3-6	None	IGHJ3	CARGNSAWFAYW	ko	135	7.2973	1642	88.7568	448	24.2162
247	clonotype1319	IGH	IGHM	Hc	IGHV1-54	None	IGHJ4	CARLVGGYDYAMDYW	ko	15	0.810811	1642	88.7568	634	34.2703
248	clonotype1320	IGH	IGHM	Hc	IGHV1-22	None	IGHJ1	CARGGLRRLRYFDVW	ko	38	2.05405	1642	88.7568	270	14.5946
249	clonotype1321	IGH	IGHM	Hc	IGHV9-3	None	IGHJ3	CARGNYDYDAWFAYW	ko	89	4.81081	1642	88.7568	448	24.2162
250	clonotype1322	IGH	None	Hc	IGHV1-26	IGHD2-7	IGHJ2	CAYLLWLRPYYFDYW	ko	130	7.02703	3	0.162162	498	26.9189
251	clonotype1323	IGH	IGHM	Hc	IGHV1-82	IGHD1-1	IGHJ3	CARSLIYYYGSSYAYW	ko	21	1.13514	150	8.10811	448	24.2162
252	clonotype1324	IGH	IGHM	Hc	IGHV6-3	None	IGHJ2	CTGGWFDYW	ko	82	4.43243	1642	88.7568	498	26.9189
253	clonotype1325	IGH	IGHM	Hc	IGHV1-39	None	IGHJ4	CARLPANSDYAMDYW	ko	39	2.10811	1642	88.7568	634	34.2703
254	clonotype1326	IGH	IGHM	Hc	IGHV6-3	None	IGHJ4	CTGLLLYAMDYW	ko	82	4.43243	1642	88.7568	634	34.2703
255	clonotype1327	IGH	IGHM	Hc	IGHV1-75	None	IGHJ2	CARRLLQGYFDYW	ko	36	1.94595	1642	88.7568	498	26.9189
256	clonotype1329	IGH	None	Hc	IGHV1-74	None	IGHJ4	CAADGYSYAMDYW	ko	13	0.702703	1642	88.7568	634	34.2703
257	clonotype1330	IGH	IGHM	Hc	IGHV8-12	None	IGHJ1	CARLYSNYGWYFDVW	ko	38	2.05405	1642	88.7568	270	14.5946
258	clonotype1332	IGH	IGHM	Hc	IGHV5-17	None	IGHJ2	CARDGYDPFYFDYW	ko	17	0.918919	1642	88.7568	498	26.9189
259	clonotype1333	IGH	IGHM	Hc	IGHV8-8	None	IGHJ2	CARIAKYGNSLFDYW	ko	78	4.21622	1642	88.7568	498	26.9189
260	clonotype1334	IGH	IGHM	Hc	IGHV1-34	IGHD1-1	IGHJ2	CARGGYYYYGSSYNYW	ko	5	0.27027	150	8.10811	498	26.9189
261	clonotype1335	IGH	IGHM	Hc	IGHV3-6	None	IGHJ2	CAREVLGRYFDYW	ko	135	7.2973	1642	88.7568	498	26.9189
262	clonotype1336	IGH	IGHM	Hc	IGHV1-5	None	IGHJ3	CTRSDYYGSRGFAYW	ko	31	1.67568	1642	88.7568	448	24.2162
263	clonotype1337	IGH	IGHM	Hc	IGHV9-3	None	IGHJ4	CARSAYYSNDAMDYW	ko	89	4.81081	1642	88.7568	634	34.2703
264	clonotype1338	IGH	IGHD	Hc	IGHV2-2	None	IGHJ3	CARRRSDLPFAYW	ko	48	2.59459	1642	88.7568	448	24.2162
265	clonotype1339	IGH	None	Hc	IGHV1-50	None	IGHJ3	CAWDGSFAYW	ko	10	0.540541	1642	88.7568	448	24.2162
266	clonotype1340	IGH	IGHM	Hc	IGHV1-19	None	IGHJ1	CARRGTTVGYFDVW	ko	49	2.64865	1642	88.7568	270	14.5946
267	clonotype1341	IGH	IGHM	Hc	IGHV1-39	None	IGHJ3	CARDYSNYPRFAYW	ko	39	2.10811	1642	88.7568	448	24.2162
268	clonotype1342	IGH	None	Hc	IGHV10-1	IGHD2-4	IGHJ3	CVKGVYYDYDEFAYW	ko	27	1.45946	18	0.972973	448	24.2162
269	clonotype1344	IGH	IGHM	Hc	IGHV1-72	None	IGHJ2	CAREGYGSSVLDYW	ko	21	1.13514	1642	88.7568	498	26.9189
270	clonotype1345	IGH	IGHM	Hc	IGHV3-6	None	IGHJ3	CARGNYGSSYGFAYW	ko	135	7.2973	1642	88.7568	448	24.2162
271	clonotype1346	IGH	IGHM	Hc	IGHV15-2	None	IGHJ1	CARNYYGSSSHWYFDVW	ko	13	0.702703	1642	88.7568	270	14.5946
272	clonotype1347	IGH	IGHM	Hc	IGHV2-6	None	IGHJ4	CARHPPYDYGGYYAMDYW	ko	12	0.648649	1642	88.7568	634	34.2703
273	clonotype1348	IGH	IGHM	Hc	IGHV1-53	None	IGHJ4	CARSMGTTVANYYAMDYW	ko	29	1.56757	1642	88.7568	634	34.2703
274	clonotype1349	IGH	IGHM	Hc	IGHV9-3	None	IGHJ1	CASGGSYYGGYFDVW	ko	89	4.81081	1642	88.7568	270	14.5946
275	clonotype1350	IGH	IGHM	Hc	IGHV5-9-1	None	IGHJ2	CTREGYPYYFDYW	ko	12	0.648649	1642	88.7568	498	26.9189
276	clonotype1351	IGH	IGHM	Hc	IGHV4-1	None	IGHJ1	CARDYGSSFDWYFDVW	ko	41	2.21622	1642	88.7568	270	14.5946
277	clonotype1352	IGH	IGHM	Hc	IGHV1-81	None	IGHJ2	CARGVEDYW	ko	39	2.10811	1642	88.7568	498	26.9189
278	clonotype1353	IGH	IGHM	Hc	IGHV1-18	None	IGHJ4	CARYVIYAMDYW	ko	47	2.54054	1642	88.7568	634	34.2703
279	clonotype1354	IGH	IGHM	Hc	IGHV5-17	None	IGHJ4	CGRGGAMDYW	ko	17	0.918919	1642	88.7568	634	34.2703
280	clonotype1355	IGH	IGHM	Hc	IGHV4-1	None	IGHJ4	CARTYYYEEGAMDYW	ko	41	2.21622	1642	88.7568	634	34.2703
281	clonotype1356	IGH	IGHM	Hc	IGHV8-8	None	IGHJ2	CARIPPIYPRDYFDYW	ko	78	4.21622	1642	88.7568	498	26.9189
282	clonotype1358	IGH	IGHM	Hc	IGHV5-16	None	IGHJ3	CAREDGPW	ko	29	1.56757	1642	88.7568	448	24.2162
283	clonotype1359	IGH	IGHM	Hc	IGHV1-26	None	IGHJ2	CARSYGSSPYFDYW	ko	130	7.02703	1642	88.7568	498	26.9189
284	clonotype1360	IGH	None	Hc	IGHV1-26	IGHD1-1	IGHJ2	CARDGFPITTVVATNFDYW	ko	130	7.02703	150	8.10811	498	26.9189
285	clonotype1361	IGH	IGHM	Hc	IGHV3-1	None	IGHJ2	CARGLITTVVFDYW	ko	21	1.13514	1642	88.7568	498	26.9189
286	clonotype1362	IGH	IGHM	Hc	IGHV9-3	None	IGHJ2	CARSYYGSSSYFDYW	ko	89	4.81081	1642	88.7568	498	26.9189
287	clonotype1363	IGH	IGHM	Hc	IGHV1-9	None	IGHJ4	CARGADYPYYYAMDYW	ko	27	1.45946	1642	88.7568	634	34.2703
288	clonotype1364	IGH	IGHM	Hc	IGHV8-12	None	IGHJ4	CARSSDGYYEGAMDYW	ko	38	2.05405	1642	88.7568	634	34.2703
289	clonotype1367	IGH	IGHM	Hc	IGHV1-66	None	IGHJ2	CARGELRSPFDYW	ko	6	0.324324	1642	88.7568	498	26.9189
290	clonotype1368	IGH	IGHM	Hc	IGHV1-62-2	None	IGHJ4	CARHEAKRGLGYAMDYW	ko	16	0.864865	1642	88.7568	634	34.2703
291	clonotype1369	IGH	None	Hc	IGHV1-81	None	IGHJ1	CARPCYWYFDVW	ko	39	2.10811	1642	88.7568	270	14.5946
292	clonotype1370	IGH	IGHM	Hc	IGHV5-9-1	None	IGHJ4	CTRRGDYYYYAMDYW	ko	12	0.648649	1642	88.7568	634	34.2703
293	clonotype1371	IGH	IGHM	Hc	IGHV1-76	None	IGHJ1	CARSGGSSYYWYFDVW	ko	13	0.702703	1642	88.7568	270	14.5946
294	clonotype1372	IGH	IGHM	Hc	IGHV6-3	None	IGHJ1	CTAGSSYVVYWYFDVW	ko	82	4.43243	1642	88.7568	270	14.5946
295	clonotype1373	IGH	IGHM	Hc	IGHV2-2	None	IGHJ4	CARNEAYFAMDYW	ko	48	2.59459	1642	88.7568	634	34.2703
296	clonotype1375	IGH	IGHM	Hc	IGHV2-3	None	IGHJ4	CANYGNYGAMDYW	ko	16	0.864865	1642	88.7568	634	34.2703
297	clonotype1376	IGH	IGHM	Hc	IGHV1-52	None	IGHJ1	CARRSYYYGSSHEGYFDVW	ko	6	0.324324	1642	88.7568	270	14.5946
298	clonotype1377	IGH	IGHM	Hc	IGHV3-6	None	IGHJ2	CARGHYDYDDGFDYW	ko	135	7.2973	1642	88.7568	498	26.9189
299	clonotype1378	IGH	IGHM	Hc	IGHV6-3	None	IGHJ3	CTGYYGSSPVAYW	ko	82	4.43243	1642	88.7568	448	24.2162
300	clonotype1380	IGH	IGHM	Hc	IGHV4-1	IGHD1-1	IGHJ2	CASYYYGSSCYFDYW	ko	41	2.21622	150	8.10811	498	26.9189
301	clonotype1381	IGH	IGHM	Hc	IGHV6-6	None	IGHJ3	CTSYYDLFFAYW	ko	25	1.35135	1642	88.7568	448	24.2162
302	clonotype1382	IGH	IGHM	Hc	IGHV4-1	None	IGHJ1	CARPDYGSSYDWYFDVW	ko	41	2.21622	1642	88.7568	270	14.5946
303	clonotype1383	IGH	None	Hc	IGHV2-9-1	None	IGHJ3	CASHSNYVGFAYW	ko	21	1.13514	1642	88.7568	448	24.2162
304	clonotype1384	IGH	IGHM	Hc	IGHV1-26	IGHD1-1	IGHJ4	CARAHYYGSSYYAMDYW	ko	130	7.02703	150	8.10811	634	34.2703
305	clonotype1385	IGH	IGHM	Hc	IGHV1-9	None	IGHJ3	CARNLHGFFDYY	ko	27	1.45946	1642	88.7568	448	24.2162
306	clonotype1386	IGH	IGHM	Hc	IGHV1-50	None	IGHJ4	CARFHYDGYTGDAMDYW	ko	10	0.540541	1642	88.7568	634	34.2703
307	clonotype1388	IGH	IGHM	Hc	IGHV1-19	None	IGHJ4	CAIYDGYGGYAMDYW	ko	49	2.64865	1642	88.7568	634	34.2703
308	clonotype1389	IGH	IGHM	Hc	IGHV8-8	IGHD1-1	IGHJ1	CARTSHYYGSSHGYFDVW	ko	78	4.21622	150	8.10811	270	14.5946
309	clonotype1390	IGH	IGHM	Hc	IGHV5-4	None	IGHJ4	CARDYYGSSFPYAMDYW	ko	23	1.24324	1642	88.7568	634	34.2703
310	clonotype1391	IGH	IGHM	Hc	IGHV1-26	None	IGHJ4	CARWDDGLYAMDYW	ko	130	7.02703	1642	88.7568	634	34.2703
311	clonotype1392	IGH	IGHM	Hc	IGHV1-58	None	IGHJ2	CARQGGTPYFDYW	ko	15	0.810811	1642	88.7568	498	26.9189
312	clonotype1394	IGH	IGHM	Hc	IGHV14-2	None	IGHJ4	CASLYLYAMDYW	ko	14	0.756757	1642	88.7568	634	34.2703
313	clonotype1395	IGH	IGHM	Hc	IGHV1-82	None	IGHJ2	CARSGGSTVVDYW	ko	21	1.13514	1642	88.7568	498	26.9189
314	clonotype1396	IGH	IGHM	Hc	IGHV1-81	None	IGHJ2	CARDYGSSYRNYW	ko	39	2.10811	1642	88.7568	498	26.9189
315	clonotype1397	IGH	IGHM	Hc	IGHV1-22	None	IGHJ2	CAREEGSSSVFDYW	ko	38	2.05405	1642	88.7568	498	26.9189
316	clonotype1400	IGH	IGHM	Hc	IGHV2-9-1	None	IGHJ2	CARPGDDDYDEVYFDYW	ko	21	1.13514	1642	88.7568	498	26.9189
317	clonotype1401	IGH	IGHM	Hc	IGHV1-81	None	IGHJ1	CARSNYYGSEGWYFDVW	ko	39	2.10811	1642	88.7568	270	14.5946
318	clonotype1402	IGH	IGHM	Hc	IGHV6-3	None	IGHJ4	CTGVPPVVATDYAMDYW	ko	82	4.43243	1642	88.7568	634	34.2703
319	clonotype1405	IGH	IGHM	Hc	IGHV2-5	None	IGHJ1	CAKNIRLRYFDVW	ko	16	0.864865	1642	88.7568	270	14.5946
320	clonotype1406	IGH	IGHM	Hc	IGHV2-2	None	IGHJ2	CARNYYYGTSFDYW	ko	48	2.59459	1642	88.7568	498	26.9189
321	clonotype1407	IGH	IGHM	Hc	IGHV9-3	None	IGHJ2	CARSGLGGNRANWEDYFDYW	ko	89	4.81081	1642	88.7568	498	26.9189
322	clonotype1408	IGH	IGHM	Hc	IGHV1-74	None	IGHJ1	CAISNWYFDVW	ko	13	0.702703	1642	88.7568	270	14.5946
323	clonotype1409	IGH	IGHM	Hc	IGHV2-6	None	IGHJ4	CARHDDGYYNYYAMDYW	ko	12	0.648649	1642	88.7568	634	34.2703
324	clonotype1410	IGH	IGHM	Hc	IGHV14-4	None	IGHJ1	CTPLITTVGYFDVW	ko	24	1.2973	1642	88.7568	270	14.5946
325	clonotype1411	IGH	IGHM	Hc	IGHV2-2	None	IGHJ4	CAMYGEGAMDYW	ko	48	2.59459	1642	88.7568	634	34.2703
326	clonotype1413	IGH	IGHM	Hc	IGHV1-22	None	IGHJ4	CARGYYYAMDYW	ko	38	2.05405	1642	88.7568	634	34.2703
327	clonotype1414	IGH	IGHM	Hc	IGHV1-64	None	IGHJ4	CARKLTGLYYAMDYW	ko	36	1.94595	1642	88.7568	634	34.2703
328	clonotype1415	IGH	IGHM	Hc	IGHV1-9	None	IGHJ4	CARTTVVADYAMDYW	ko	27	1.45946	1642	88.7568	634	34.2703
329	clonotype1416	IGH	IGHM	Hc	IGHV8-12	None	IGHJ4	CARTGGYYFYAMDYW	ko	38	2.05405	1642	88.7568	634	34.2703
330	clonotype1417	IGH	IGHM	Hc	IGHV3-6	None	IGHJ3	CARGPGSSLW	ko	135	7.2973	1642	88.7568	448	24.2162
331	clonotype1418	IGH	IGHM	Hc	IGHV5-17	None	IGHJ4	CARDGNYFYAMDYW	ko	17	0.918919	1642	88.7568	634	34.2703
332	clonotype1419	IGH	IGHM	Hc	IGHV1-37	None	IGHJ2	CARGGVNYYGSREYYFDYW	ko	3	0.162162	1642	88.7568	498	26.9189
333	clonotype1422	IGH	IGHM	Hc	IGHV1-50	None	IGHJ2	CALRYYFDYW	ko	10	0.540541	1642	88.7568	498	26.9189
334	clonotype1423	IGH	IGHM	Hc	IGHV14-4	None	IGHJ2	CTAPITTVGYW	ko	24	1.2973	1642	88.7568	498	26.9189
335	clonotype1424	IGH	IGHM	Hc	IGHV6-3	None	IGHJ4	CTYYDYDVDAMDYW	ko	82	4.43243	1642	88.7568	634	34.2703
336	clonotype1425	IGH	IGHM	Hc	IGHV1-26	IGHD1-1	IGHJ1	CARDGVYYGSSYRYFDVW	ko	130	7.02703	150	8.10811	270	14.5946
337	clonotype1426	IGH	IGHM	Hc	IGHV1-22	None	IGHJ2	CATNWAFDYW	ko	38	2.05405	1642	88.7568	498	26.9189
338	clonotype1427	IGH	None	Hc	IGHV5-4	IGHD2-3	IGHJ2	CARDQDPSIYDGYYVYFDYW	ko	23	1.24324	7	0.378378	498	26.9189
339	clonotype1428	IGH	IGHM	Hc	IGHV1-85	None	IGHJ2	CAREGWDYW	ko	9	0.486486	1642	88.7568	498	26.9189
340	clonotype1429	IGH	IGHM	Hc	IGHV13-2	None	IGHJ1	CSRAYFDVW	ko	18	0.972973	1642	88.7568	270	14.5946
341	clonotype1430	IGH	IGHM	Hc	IGHV10-3	None	IGHJ4	CVRDRSSPYAMDYW	ko	33	1.78378	1642	88.7568	634	34.2703
342	clonotype1431	IGH	IGHM	Hc	IGHV7-3	None	IGHJ4	CARRVGLRRNYYAMDYW	ko	27	1.45946	1642	88.7568	634	34.2703
343	clonotype1433	IGH	None	Hc	IGHV5-16	None	IGHJ4	CARGGGYPYAMDYW	ko	29	1.56757	1642	88.7568	634	34.2703
344	clonotype1434	IGH	IGHM	Hc	IGHV1-26	None	IGHJ3	CATDLLLPFAYW	ko	130	7.02703	1642	88.7568	448	24.2162
345	clonotype1435	IGH	IGHM	Hc	IGHV1-53	None	IGHJ4	CAPNLLLRYYAMDYW	ko	29	1.56757	1642	88.7568	634	34.2703
346	clonotype1437	IGH	IGHM	Hc	IGHV9-3	None	IGHJ3	CARMSYDYGFAYW	ko	89	4.81081	1642	88.7568	448	24.2162
347	clonotype1438	IGH	IGHM	Hc	IGHV8-8	None	IGHJ3	CARIARGNDYGDGFAYW	ko	78	4.21622	1642	88.7568	448	24.2162
348	clonotype1439	IGH	IGHM	Hc	IGHV1-5	None	IGHJ3	CTSPDYYDYEGSWFAYW	ko	31	1.67568	1642	88.7568	448	24.2162
349	clonotype1440	IGH	IGHM	Hc	IGHV6-3	IGHD1-1	IGHJ2	CTTDYYGSSYGYW	ko	82	4.43243	150	8.10811	498	26.9189
350	clonotype1441	IGH	IGHM	Hc	IGHV1-26	None	IGHJ4	CARSKYEVVAKDYAMDYW	ko	130	7.02703	1642	88.7568	634	34.2703
351	clonotype1445	IGH	IGHM	Hc	IGHV1-19	None	IGHJ2	CAKDYYDYDDYW	ko	49	2.64865	1642	88.7568	498	26.9189
352	clonotype1446	IGH	IGHM	Hc	IGHV1-54	None	IGHJ4	CARGRYDYDRYYAMDYW	ko	15	0.810811	1642	88.7568	634	34.2703
353	clonotype1447	IGH	IGHM	Hc	IGHV3-6	None	IGHJ4	CASTDYYAMDYW	ko	135	7.2973	1642	88.7568	634	34.2703
354	clonotype1449	IGH	IGHM	Hc	IGHV1-78	None	IGHJ3	CASPCPITTVGGFAYW	ko	26	1.40541	1642	88.7568	448	24.2162
355	clonotype1450	IGH	IGHM	Hc	IGHV1-58	None	IGHJ1	CARSADYDTWYFDVW	ko	15	0.810811	1642	88.7568	270	14.5946
356	clonotype1451	IGH	IGHM	Hc	IGHV7-1	None	IGHJ3	CARDAITGTPFAYW	ko	22	1.18919	1642	88.7568	448	24.2162
357	clonotype1452	IGH	IGHM	Hc	IGHV10-1	None	IGHJ4	CVRHEGLRRGPTTAEDYAMDYW	ko	27	1.45946	1642	88.7568	634	34.2703
358	clonotype1453	IGH	IGHM	Hc	IGHV1-19	None	IGHJ4	CARVSYYYGNCAMDYW	ko	49	2.64865	1642	88.7568	634	34.2703
359	clonotype1454	IGH	IGHM	Hc	IGHV1-50	None	IGHJ2	CARYDYGRDYFDYW	ko	10	0.540541	1642	88.7568	498	26.9189
360	clonotype1455	IGH	IGHM	Hc	IGHV1-26	None	IGHJ2	CARSYGYEGKGFDYW	ko	130	7.02703	1642	88.7568	498	26.9189
361	clonotype1456	IGH	IGHM	Hc	IGHV1-69	None	IGHJ4	CARSEFYAMDYW	ko	15	0.810811	1642	88.7568	634	34.2703
362	clonotype1458	IGH	IGHM	Hc	IGHV9-3	None	IGHJ4	CARSDFLDYW	ko	89	4.81081	1642	88.7568	634	34.2703
363	clonotype1459	IGH	IGHM	Hc	IGHV1-42	None	IGHJ2	CARYYFDYW	ko	15	0.810811	1642	88.7568	498	26.9189
364	clonotype1460	IGH	IGHM	Hc	IGHV1-26	None	IGHJ2	CARGEYYSNYFDYW	ko	130	7.02703	1642	88.7568	498	26.9189
365	clonotype1461	IGH	IGHM	Hc	IGHV5-17	None	IGHJ4	CARGYYGSNYAMDYW	ko	17	0.918919	1642	88.7568	634	34.2703
366	clonotype1462	IGH	IGHM	Hc	IGHV1-78	None	IGHJ2	CARGDYGYDGGVFDYW	ko	26	1.40541	1642	88.7568	498	26.9189
367	clonotype1463	IGH	IGHM	Hc	IGHV1-53	None	IGHJ4	CARSGDYDGGNYYAMDYW	ko	29	1.56757	1642	88.7568	634	34.2703
368	clonotype1466	IGH	IGHM	Hc	IGHV14-4	None	IGHJ1	CTTNDGQWYFDVW	ko	24	1.2973	1642	88.7568	270	14.5946
369	clonotype1467	IGH	IGHM	Hc	IGHV3-4	None	IGHJ1	CARDEGYYGSSVYWYFDVW	ko	4	0.216216	1642	88.7568	270	14.5946
370	clonotype1469	IGH	IGHM	Hc	IGHV3-1	None	IGHJ1	CARPVVKGYFDVW	ko	21	1.13514	1642	88.7568	270	14.5946
371	clonotype1470	IGH	IGHM	Hc	IGHV13-2	None	IGHJ1	CSRSGDYYGSSVDWYFDVW	ko	18	0.972973	1642	88.7568	270	14.5946
372	clonotype1471	IGH	IGHM	Hc	IGHV1-19	None	IGHJ4	CASPHYYDYDGYYAMDYW	ko	49	2.64865	1642	88.7568	634	34.2703
373	clonotype1473	IGH	IGHM	Hc	IGHV7-3	None	IGHJ1	CARYEGATVVDYWYFDVW	ko	27	1.45946	1642	88.7568	270	14.5946
374	clonotype1474	IGH	IGHM	Hc	IGHV6-3	None	IGHJ4	CTDYDYDGDYAMDYW	ko	82	4.43243	1642	88.7568	634	34.2703
375	clonotype1477	IGH	IGHM	Hc	IGHV2-2	None	IGHJ3	CAREVLYYDYGFAYW	ko	48	2.59459	1642	88.7568	448	24.2162
376	clonotype1478	IGH	IGHM	Hc	IGHV1-5	IGHD2-3	IGHJ3	CAWALYDGYYGGFAYW	ko	31	1.67568	7	0.378378	448	24.2162
377	clonotype1479	IGH	None	Hc	IGHV1-26	None	IGHJ3	CARGGYYDYEGFAYW	ko	130	7.02703	1642	88.7568	448	24.2162
378	clonotype1480	IGH	IGHM	Hc	IGHV10-3	None	IGHJ4	CVRDPPITPAMDYW	ko	33	1.78378	1642	88.7568	634	34.2703
379	clonotype1481	IGH	IGHM	Hc	IGHV4-1	None	IGHJ3	CASLYDGYVAWFAYW	ko	41	2.21622	1642	88.7568	448	24.2162
380	clonotype1483	IGH	IGHM	Hc	IGHV10-3	None	IGHJ4	CVRDGIYYGYDAMDYW	ko	33	1.78378	1642	88.7568	634	34.2703
381	clonotype1485	IGH	IGHM	Hc	IGHV5-6	None	IGHJ4	CARPSRQLRFYAMDYW	ko	19	1.02703	1642	88.7568	634	34.2703
382	clonotype1486	IGH	IGHM	Hc	IGHV1-5	None	IGHJ2	CTVTTVDYW	ko	31	1.67568	1642	88.7568	498	26.9189
383	clonotype1487	IGH	IGHM	Hc	IGHV1-18	IGHD1-1	IGHJ2	CARKPYYGSSYFDYW	ko	47	2.54054	150	8.10811	498	26.9189
384	clonotype1488	IGH	None	Hc	IGHV8-8	None	IGHJ2	CARIAPYYYESYFDYW	ko	78	4.21622	1642	88.7568	498	26.9189
385	clonotype1490	IGH	IGHM	Hc	IGHV1-5	None	IGHJ2	CTLVLSDYW	ko	31	1.67568	1642	88.7568	498	26.9189
386	clonotype1491	IGH	IGHM	Hc	IGHV1-84	None	IGHJ3	CARRVYYYGFAYW	ko	10	0.540541	1642	88.7568	448	24.2162
387	clonotype1492	IGH	IGHM	Hc	IGHV3-6	None	IGHJ3	CARGGTTVARGIWFAYW	ko	135	7.2973	1642	88.7568	448	24.2162
388	clonotype1493	IGH	IGHM	Hc	IGHV5-4	None	IGHJ2	CARGQTVFYFDYW	ko	23	1.24324	1642	88.7568	498	26.9189
389	clonotype1494	IGH	IGHM	Hc	IGHV1-72	None	IGHJ3	CARSGYYGSSVAWFAYW	ko	21	1.13514	1642	88.7568	448	24.2162
390	clonotype1495	IGH	IGHM	Hc	IGHV1-64	None	IGHJ2	CASHLLTTAFDYW	ko	36	1.94595	1642	88.7568	498	26.9189
391	clonotype1496	IGH	IGHM	Hc	IGHV9-3	None	IGHJ2	CARKGTTVVAVDYW	ko	89	4.81081	1642	88.7568	498	26.9189
392	clonotype1497	IGH	IGHM	Hc	IGHV1-39	None	IGHJ4	CARGDYYAMDYW	ko	39	2.10811	1642	88.7568	634	34.2703
393	clonotype1498	IGH	IGHM	Hc	IGHV1-81	None	IGHJ4	CARKGDYAMDYW	ko	39	2.10811	1642	88.7568	634	34.2703
394	clonotype1499	IGH	IGHM	Hc	IGHV6-6	None	IGHJ1	CTRPHFPGVWYFDVW	ko	25	1.35135	1642	88.7568	270	14.5946
395	clonotype1500	IGH	IGHM	Hc	IGHV5-16	None	IGHJ2	CARDIRGDYYGSSLGYFDYW	ko	29	1.56757	1642	88.7568	498	26.9189
396	clonotype1501	IGH	IGHM	Hc	IGHV5-16	None	IGHJ1	CARDLPYDGHWYFDVW	ko	29	1.56757	1642	88.7568	270	14.5946
397	clonotype1502	IGH	IGHM	Hc	IGHV9-1	None	IGHJ1	CVRGRGYHWYFDVW	ko	18	0.972973	1642	88.7568	270	14.5946
398	clonotype1506	IGH	IGHM	Hc	IGHV10-1	None	IGHJ4	CVRHGGYYVGDYW	ko	27	1.45946	1642	88.7568	634	34.2703
399	clonotype1507	IGH	IGHM	Hc	IGHV6-3	IGHD1-1	IGHJ4	CTKIYYYGSSWLDYYAMDYW	ko	82	4.43243	150	8.10811	634	34.2703
400	clonotype1509	IGH	IGHM	Hc	IGHV1-47	None	IGHJ1	CARRGGSSPEGYFDVW	ko	8	0.432432	1642	88.7568	270	14.5946
401	clonotype1511	IGH	IGHM	Hc	IGHV8-8	IGHD1-1	IGHJ4	CARMFSITTVVATPYAMDYW	ko	78	4.21622	150	8.10811	634	34.2703
402	clonotype1512	IGH	IGHM	Hc	IGHV10-1	None	IGHJ1	CVRHMYYGSSCFDVW	ko	27	1.45946	1642	88.7568	270	14.5946
403	clonotype1513	IGH	IGHM	Hc	IGHV2-2	None	IGHJ4	CASPWEVTTGPYYAMDYW	ko	48	2.59459	1642	88.7568	634	34.2703
404	clonotype1515	IGH	IGHM	Hc	IGHV1-53	None	IGHJ3	CAYGFNLWFAYW	ko	29	1.56757	1642	88.7568	448	24.2162
405	clonotype1516	IGH	IGHM	Hc	IGHV1-26	None	IGHJ4	CARRLWIYYYAMDYW	ko	130	7.02703	1642	88.7568	634	34.2703
406	clonotype1517	IGH	IGHM	Hc	IGHV7-3	None	IGHJ2	CARYINGSRDYFDYW	ko	27	1.45946	1642	88.7568	498	26.9189
407	clonotype1518	IGH	IGHD	Hc	IGHV1-9	None	IGHJ3	CAREGDGTQFAYW	ko	27	1.45946	1642	88.7568	448	24.2162
408	clonotype1519	IGH	IGHM	Hc	IGHV3-6	None	IGHJ3	CARDYDYDAWFAYW	ko	135	7.2973	1642	88.7568	448	24.2162
409	clonotype1520	IGH	None	Hc	IGHV1-26	None	IGHJ3	CARYPWFAYW	ko	130	7.02703	1642	88.7568	448	24.2162
410	clonotype1521	IGH	None	Hc	IGHV7-1	None	IGHJ1	CARDAELAGYFDVW	ko	22	1.18919	1642	88.7568	270	14.5946
411	clonotype1522	IGH	IGHM	Hc	IGHV14-2	None	IGHJ2	CANYGSSSYC	ko	14	0.756757	1642	88.7568	498	26.9189
412	clonotype1523	IGH	IGHM	Hc	IGHV3-1	None	IGHJ2	CARLELYENYFDYW	ko	21	1.13514	1642	88.7568	498	26.9189
413	clonotype1524	IGH	IGHM	Hc	IGHV1-31	None	IGHJ4	CAREGIYYGNFYAMDYW	ko	4	0.216216	1642	88.7568	634	34.2703
414	clonotype1526	IGH	IGHM	Hc	IGHV8-8	None	IGHJ3	CARISDSSGPWFAYW	ko	78	4.21622	1642	88.7568	448	24.2162
415	clonotype1527	IGH	IGHM	Hc	IGHV10-3	None	IGHJ1	CVRDLRGYWYFDVW	ko	33	1.78378	1642	88.7568	270	14.5946
416	clonotype1528	IGH	IGHM	Hc	IGHV1-78	None	IGHJ4	CARSGRWSLRYYAMDYW	ko	26	1.40541	1642	88.7568	634	34.2703
417	clonotype1529	IGH	IGHM	Hc	IGHV1-81	None	IGHJ2	CARRTVVASGDYW	ko	39	2.10811	1642	88.7568	498	26.9189
418	clonotype1530	IGH	IGHM	Hc	IGHV1-71	None	IGHJ1	CARHEGPRYFDVW	ko	11	0.594595	1642	88.7568	270	14.5946
419	clonotype1531	IGH	IGHM	Hc	IGHV1-53	None	IGHJ2	CARSSYSNYDYW	ko	29	1.56757	1642	88.7568	498	26.9189
420	clonotype1533	IGH	IGHM	Hc	IGHV9-1	None	IGHJ3	CVREGSSGSWFAYW	ko	18	0.972973	1642	88.7568	448	24.2162
421	clonotype1534	IGH	IGHM	Hc	IGHV1-64	None	IGHJ1	CARSILITTVEYFDVW	ko	36	1.94595	1642	88.7568	270	14.5946
422	clonotype1535	IGH	IGHM	Hc	IGHV1-18	None	IGHJ2	CARKETTVVEDYFDYW	ko	47	2.54054	1642	88.7568	498	26.9189
423	clonotype1536	IGH	IGHM	Hc	IGHV1-81	None	IGHJ4	CARVERGYDYDEGYYYAMDYW	ko	39	2.10811	1642	88.7568	634	34.2703
424	clonotype1537	IGH	IGHM	Hc	IGHV2-3	None	IGHJ4	CAKNDYYYAMDYW	ko	16	0.864865	1642	88.7568	634	34.2703
425	clonotype1538	IGH	IGHM	Hc	IGHV1-81	None	IGHJ4	CARVTTVVASGGDYW	ko	39	2.10811	1642	88.7568	634	34.2703
426	clonotype1539	IGH	None	Hc	IGHV1-80	None	IGHJ3	CANYYGSWFAYW	ko	14	0.756757	1642	88.7568	448	24.2162
427	clonotype1540	IGH	IGHM	Hc	IGHV1-62-2	None	IGHJ4	CARHEDRNYGSSFTYYYAMDYW	ko	16	0.864865	1642	88.7568	634	34.2703
428	clonotype1543	IGH	None	Hc	IGHV14-2	None	IGHJ4	CARKYLYYAMDYW	ko	14	0.756757	1642	88.7568	634	34.2703
429	clonotype1545	IGH	IGHM	Hc	IGHV1-19	None	IGHJ1	CAREYYGSKGWYFDVW	ko	49	2.64865	1642	88.7568	270	14.5946
430	clonotype1546	IGH	IGHM	Hc	IGHV1-64	None	IGHJ2	CAGLDYW	ko	36	1.94595	1642	88.7568	498	26.9189
431	clonotype1548	IGH	IGHM	Hc	IGHV2-2	None	IGHJ3	CARNLRKAWFAYW	ko	48	2.59459	1642	88.7568	448	24.2162
432	clonotype1550	IGH	IGHM	Hc	IGHV7-3	None	IGHJ3	CARYLSYYGPWFAYW	ko	27	1.45946	1642	88.7568	448	24.2162
433	clonotype1551	IGH	IGHM	Hc	IGHV8-12	IGHD1-1	IGHJ1	CARRSPYYYGSTYWYFDVW	ko	38	2.05405	150	8.10811	270	14.5946
434	clonotype1552	IGH	IGHM	Hc	IGHV5-2	None	IGHJ3	CARHGDWDSFAYW	ko	4	0.216216	1642	88.7568	448	24.2162
435	clonotype1556	IGH	IGHM	Hc	IGHV1-9	IGHD1-1	IGHJ4	CARSVITTVVAGDYYAMDYW	ko	27	1.45946	150	8.10811	634	34.2703
436	clonotype1557	IGH	IGHM	Hc	IGHV1-26	None	IGHJ2	CARTPYSNYDYFDYW	ko	130	7.02703	1642	88.7568	498	26.9189
437	clonotype1558	IGH	IGHM	Hc	IGHV3-6	None	IGHJ2	CAREGGLPFDYW	ko	135	7.2973	1642	88.7568	498	26.9189
438	clonotype1560	IGH	IGHM	Hc	IGHV1-18	None	IGHJ4	CARSGGSSGYYYAMDYW	ko	47	2.54054	1642	88.7568	634	34.2703
439	clonotype1562	IGH	IGHM	Hc	IGHV1-82	None	IGHJ2	CARGGYLDYW	ko	21	1.13514	1642	88.7568	498	26.9189
440	clonotype1563	IGH	IGHM	Hc	IGHV10-1	IGHD2-5	IGHJ4	CVRHESYYSNYDAMDYW	ko	27	1.45946	12	0.648649	634	34.2703
441	clonotype1564	IGH	None	Hc	IGHV6-6	None	IGHJ3	CTDGYSFAYW	ko	25	1.35135	1642	88.7568	448	24.2162
442	clonotype1565	IGH	IGHM	Hc	IGHV2-5	IGHD1-1	IGHJ3	CASHYYGSSYPFAYW	ko	16	0.864865	150	8.10811	448	24.2162
443	clonotype1566	IGH	IGHM	Hc	IGHV6-3	None	IGHJ4	CTELTVYAMDYW	ko	82	4.43243	1642	88.7568	634	34.2703
444	clonotype1567	IGH	IGHM	Hc	IGHV2-4	None	IGHJ4	CAKSPYDYLYYYAMDYW	ko	1	0.0540541	1642	88.7568	634	34.2703
445	clonotype1568	IGH	IGHM	Hc	IGHV1-19	None	IGHJ3	CASFYYYGSGFAYW	ko	49	2.64865	1642	88.7568	448	24.2162
446	clonotype1570	IGH	IGHM	Hc	IGHV1-39	None	IGHJ2	CARTGDFDYW	ko	39	2.10811	1642	88.7568	498	26.9189
447	clonotype1571	IGH	IGHM	Hc	IGHV2-3	None	IGHJ2	CAKNLWGDYW	ko	16	0.864865	1642	88.7568	498	26.9189
448	clonotype1572	IGH	IGHM	Hc	IGHV1-26	IGHD1-1	IGHJ4	CARCYYGSSYNYAMDYW	ko	130	7.02703	150	8.10811	634	34.2703
449	clonotype1574	IGH	IGHM	Hc	IGHV1-9	None	IGHJ3	CARVNDYDGLRPSYW	ko	27	1.45946	1642	88.7568	448	24.2162
450	clonotype1576	IGH	IGHM	Hc	IGHV2-2	None	IGHJ1	CARTFTYDGYYGYFDVW	ko	48	2.59459	1642	88.7568	270	14.5946
451	clonotype1577	IGH	IGHM	Hc	IGHV10-1	None	IGHJ4	CVRHAHWENAMDYW	ko	27	1.45946	1642	88.7568	634	34.2703
452	clonotype1578	IGH	IGHM	Hc	IGHV3-4	None	IGHJ3	CARGDYALAWFAYW	ko	4	0.216216	1642	88.7568	448	24.2162
453	clonotype1579	IGH	IGHM	Hc	IGHV1-55	None	IGHJ4	CARELRTVVAPYAMDYW	ko	14	0.756757	1642	88.7568	634	34.2703
454	clonotype1580	IGH	IGHM	Hc	IGHV3-6	IGHD1-1	IGHJ2	CARIYYGSSYGYFDYW	ko	135	7.2973	150	8.10811	498	26.9189
455	clonotype1581	IGH	IGHM	Hc	IGHV1-64	None	IGHJ1	CARPITTRYFDVW	ko	36	1.94595	1642	88.7568	270	14.5946
456	clonotype1582	IGH	IGHM	Hc	IGHV3-6	None	IGHJ4	CASGYDYSYAMDYW	ko	135	7.2973	1642	88.7568	634	34.2703
457	clonotype1583	IGH	IGHM	Hc	IGHV9-3	None	IGHJ1	CARRPPPRWYFDVW	ko	89	4.81081	1642	88.7568	270	14.5946
458	clonotype1584	IGH	IGHM	Hc	IGHV4-1	None	IGHJ4	CASSYYFAMDYW	ko	41	2.21622	1642	88.7568	634	34.2703
459	clonotype1585	IGH	IGHM	Hc	IGHV1-55	None	IGHJ2	CARGTARPYW	ko	14	0.756757	1642	88.7568	498	26.9189
460	clonotype1586	IGH	IGHM	Hc	IGHV2-3	None	IGHJ4	CAKPDGYYSYYAMDYW	ko	16	0.864865	1642	88.7568	634	34.2703
461	clonotype1587	IGH	IGHM	Hc	IGHV6-3	None	IGHJ3	CTEELTGAWFAYW	ko	82	4.43243	1642	88.7568	448	24.2162
462	clonotype1589	IGH	IGHM	Hc	IGHV5-17	IGHD1-1	IGHJ2	CAREGNYYGSSYYFDYW	ko	17	0.918919	150	8.10811	498	26.9189
463	clonotype1591	IGH	IGHM	Hc	IGHV1-82	None	IGHJ3	CAREGYGYDAKEFAYW	ko	21	1.13514	1642	88.7568	448	24.2162
464	clonotype1592	IGH	IGHM	Hc	IGHV14-4	IGHD2-4	IGHJ4	CTTVYYDYDWAMDYW	ko	24	1.2973	18	0.972973	634	34.2703
465	clonotype1593	IGH	IGHM	Hc	IGHV1-75	None	IGHJ4	CARFGAAQATYYAMDYW	ko	36	1.94595	1642	88.7568	634	34.2703
466	clonotype1595	IGH	IGHM	Hc	IGHV3-6	IGHD2-3	IGHJ4	CARGAFIYDGYYDYAMDYW	ko	135	7.2973	7	0.378378	634	34.2703
467	clonotype1596	IGH	IGHM	Hc	IGHV3-6	None	IGHJ4	CAREGKDYDEDAMDYW	ko	135	7.2973	1642	88.7568	634	34.2703
468	clonotype1597	IGH	IGHM	Hc	IGHV2-3	None	IGHJ3	CAKRGYSNLFAYW	ko	16	0.864865	1642	88.7568	448	24.2162
469	clonotype1600	IGH	IGHM	Hc	IGHV1-22	None	IGHJ1	CARDNYSHWYFDVW	ko	38	2.05405	1642	88.7568	270	14.5946
470	clonotype1601	IGH	IGHM	Hc	IGHV3-6	None	IGHJ3	CARDRDGYYAFAYW	ko	135	7.2973	1642	88.7568	448	24.2162
471	clonotype1602	IGH	IGHM	Hc	IGHV1-19	IGHD1-1	IGHJ4	CARSYYYGSSQYYYAMDYW	ko	49	2.64865	150	8.10811	634	34.2703
472	clonotype1603	IGH	IGHM	Hc	IGHV6-6	None	IGHJ2	CTRRYYPHFDYW	ko	25	1.35135	1642	88.7568	498	26.9189
473	clonotype1604	IGH	IGHM	Hc	IGHV7-1	None	IGHJ4	CAREYGNGAMDYW	ko	22	1.18919	1642	88.7568	634	34.2703
474	clonotype1605	IGH	IGHM	Hc	IGHV1-55	None	IGHJ2	CASGGGYNLDYW	ko	14	0.756757	1642	88.7568	498	26.9189
475	clonotype1607	IGH	IGHM	Hc	IGHV1-59	None	IGHJ4	CARQRYYAMDYW	ko	6	0.324324	1642	88.7568	634	34.2703
476	clonotype1609	IGH	IGHM	Hc	IGHV1-78	None	IGHJ2	CARRDDFYYFDYW	ko	26	1.40541	1642	88.7568	498	26.9189
477	clonotype1610	IGH	IGHM	Hc	IGHV9-1	None	IGHJ4	CVRGRMVPYAMDYW	ko	18	0.972973	1642	88.7568	634	34.2703
478	clonotype1611	IGH	IGHM	Hc	IGHV1-19	None	IGHJ3	CARSSYYSNPAWFAYW	ko	49	2.64865	1642	88.7568	448	24.2162
479	clonotype1612	IGH	IGHM	Hc	IGHV8-12	IGHD1-1	IGHJ4	CARRVITTVVATDAMDYW	ko	38	2.05405	150	8.10811	634	34.2703
480	clonotype1613	IGH	IGHM	Hc	IGHV3-1	None	IGHJ1	CAREGYYGSGDWYFDVW	ko	21	1.13514	1642	88.7568	270	14.5946
481	clonotype1614	IGH	IGHM	Hc	IGHV1-4	None	IGHJ4	CARIYYYGSNAMDYW	ko	1	0.0540541	1642	88.7568	634	34.2703
482	clonotype1615	IGH	IGHM	Hc	IGHV1-85	None	IGHJ4	CARSPPHYYGSIHAMDYW	ko	9	0.486486	1642	88.7568	634	34.2703
483	clonotype1616	IGH	IGHM	Hc	IGHV5-16	None	IGHJ4	CARGGFYGSSFYAMDYW	ko	29	1.56757	1642	88.7568	634	34.2703
484	clonotype1619	IGH	IGHM	Hc	IGHV8-8	None	IGHJ4	CAPAEGYDYDKGGAMDYW	ko	78	4.21622	1642	88.7568	634	34.2703
485	clonotype1620	IGH	IGHM	Hc	IGHV1-42	None	IGHJ4	CARSRRYDGYAMDYW	ko	15	0.810811	1642	88.7568	634	34.2703
486	clonotype1621	IGH	IGHM	Hc	IGHV8-12	None	IGHJ2	CARDYGSSYDYW	ko	38	2.05405	1642	88.7568	498	26.9189
487	clonotype1622	IGH	IGHM	Hc	IGHV9-2	None	IGHJ2	CARWGTTVGYW	ko	9	0.486486	1642	88.7568	498	26.9189
488	clonotype1624	IGH	IGHM	Hc	IGHV1-84	None	IGHJ2	CARPYYYGSSLWYFGYW	ko	10	0.540541	1642	88.7568	498	26.9189
489	clonotype1625	IGH	IGHM	Hc	IGHV5-4	IGHD1-1	IGHJ2	CARDRYYGSSYFDYW	ko	23	1.24324	150	8.10811	498	26.9189
490	clonotype1627	IGH	IGHM	Hc	IGHV1-15	None	IGHJ1	CTRTMITTTPYCYFDVW	ko	15	0.810811	1642	88.7568	270	14.5946
491	clonotype1628	IGH	IGHM	Hc	IGHV6-6	None	IGHJ3	CTRQGYSNLGGFAYW	ko	25	1.35135	1642	88.7568	448	24.2162
492	clonotype1629	IGH	IGHM	Hc	IGHV3-6	None	IGHJ2	CASLITTVGYW	ko	135	7.2973	1642	88.7568	498	26.9189
493	clonotype1631	IGH	IGHM	Hc	IGHV14-2	None	IGHJ2	CASSYYFDYW	ko	14	0.756757	1642	88.7568	498	26.9189
494	clonotype1633	IGH	IGHM	Hc	IGHV1-39	None	IGHJ4	CARGGDYGNYEAMDYW	ko	39	2.10811	1642	88.7568	634	34.2703
495	clonotype1634	IGH	IGHM	Hc	IGHV9-4	None	IGHJ1	CARNYDWYFDVW	ko	17	0.918919	1642	88.7568	270	14.5946
496	clonotype1635	IGH	IGHM	Hc	IGHV1-22	None	IGHJ2	CVRNYLDYW	ko	38	2.05405	1642	88.7568	498	26.9189
497	clonotype1636	IGH	IGHM	Hc	IGHV1-26	IGHD1-1	IGHJ4	CARYSIYYYGSSYYAMDYW	ko	130	7.02703	150	8.10811	634	34.2703
498	clonotype1637	IGH	None	Hc	IGHV1-52	None	IGHJ4	CARPTTVVAPAMDYW	ko	6	0.324324	1642	88.7568	634	34.2703
499	clonotype1638	IGH	IGHM	Hc	IGHV8-8	None	IGHJ2	CARMGGYGYFDYW	ko	78	4.21622	1642	88.7568	498	26.9189
500	clonotype1639	IGH	IGHM	Hc	IGHV3-6	None	IGHJ1	CARDEGPIYYGSSYWYFDVW	ko	135	7.2973	1642	88.7568	270	14.5946
501	clonotype1640	IGH	IGHM	Hc	IGHV1-81	None	IGHJ1	CARENGGGYDFDVW	ko	39	2.10811	1642	88.7568	270	14.5946
502	clonotype1643	IGH	IGHM	Hc	IGHV1-26	None	IGHJ1	CARGGWLPLYWYFDVW	ko	130	7.02703	1642	88.7568	270	14.5946
503	clonotype1644	IGH	IGHM	Hc	IGHV1-80	None	IGHJ2	CARGYYYASYYFDYW	ko	14	0.756757	1642	88.7568	498	26.9189
504	clonotype1645	IGH	IGHM	Hc	IGHV2-6	None	IGHJ4	CARYDYDGAMDYW	ko	12	0.648649	1642	88.7568	634	34.2703
505	clonotype1646	IGH	IGHM	Hc	IGHV9-4	None	IGHJ2	CAREWAYYYGSSLDYW	ko	17	0.918919	1642	88.7568	498	26.9189
506	clonotype1647	IGH	IGHM	Hc	IGHV8-8	None	IGHJ3	CARIAKDYPCWFAYW	ko	78	4.21622	1642	88.7568	448	24.2162
507	clonotype1650	IGH	IGHM	Hc	IGHV6-3	IGHD1-1	IGHJ4	CTVHYYYGSSPYAMDYW	ko	82	4.43243	150	8.10811	634	34.2703
508	clonotype1651	IGH	IGHM	Hc	IGHV7-1	None	IGHJ4	CARGGNHYAMDYW	ko	22	1.18919	1642	88.7568	634	34.2703
509	clonotype1652	IGH	IGHM	Hc	IGHV1-5	None	IGHJ2	CTRGGNYYSNYFDYW	ko	31	1.67568	1642	88.7568	498	26.9189
510	clonotype1653	IGH	IGHM	Hc	IGHV6-3	None	IGHJ4	CTALYYAMDYW	ko	82	4.43243	1642	88.7568	634	34.2703
511	clonotype1654	IGH	IGHM	Hc	IGHV9-1	None	IGHJ4	CVRSSTVVATKAMDYW	ko	18	0.972973	1642	88.7568	634	34.2703
512	clonotype1655	IGH	IGHM	Hc	IGHV5-6	None	IGHJ1	CARHHGNYVDFDVW	ko	19	1.02703	1642	88.7568	270	14.5946
513	clonotype1656	IGH	IGHM	Hc	IGHV2-2	None	IGHJ2	CARILRGYFDYW	ko	48	2.59459	1642	88.7568	498	26.9189
514	clonotype1657	IGH	IGHM	Hc	IGHV2-9-1	None	IGHJ1	CATYGYDWYFDVW	ko	21	1.13514	1642	88.7568	270	14.5946
515	clonotype1658	IGH	IGHM	Hc	IGHV8-8	None	IGHJ4	CARTLDGYYAMDYW	ko	78	4.21622	1642	88.7568	634	34.2703
516	clonotype1659	IGH	IGHM	Hc	IGHV1-42	None	IGHJ2	CARYGSSYYYFDYW	ko	15	0.810811	1642	88.7568	498	26.9189
517	clonotype1660	IGH	None	Hc	IGHV1-36	None	IGHJ3	CARGDGSRAFAYW	ko	8	0.432432	1642	88.7568	448	24.2162
518	clonotype1662	IGH	IGHM	Hc	IGHV5-9	None	IGHJ2	CARGFLYYGSTFDYW	ko	7	0.378378	1642	88.7568	498	26.9189
519	clonotype1664	IGH	None	Hc	IGHV1-82	None	IGHJ1	CARTYWYFDVW	ko	21	1.13514	1642	88.7568	270	14.5946
520	clonotype1665	IGH	IGHM	Hc	IGHV9-3	None	IGHJ2	CAREITTVVESYYFDYW	ko	89	4.81081	1642	88.7568	498	26.9189
521	clonotype1668	IGH	IGHM	Hc	IGHV2-2	None	IGHJ4	CARKGHYGSSSENYAMDYW	ko	48	2.59459	1642	88.7568	634	34.2703
522	clonotype1669	IGH	IGHM	Hc	IGHV10-3	None	IGHJ3	CVRDREGGAWFAYW	ko	33	1.78378	1642	88.7568	448	24.2162
523	clonotype1670	IGH	IGHM	Hc	IGHV1-34	None	IGHJ4	CARGKRIYYYAMDYW	ko	5	0.27027	1642	88.7568	634	34.2703
524	clonotype1671	IGH	IGHM	Hc	IGHV9-4	None	IGHJ4	CARVPFYGWMDYW	ko	17	0.918919	1642	88.7568	634	34.2703
525	clonotype1672	IGH	IGHM	Hc	IGHV1-75	None	IGHJ4	CARPFITTAAMDYW	ko	36	1.94595	1642	88.7568	634	34.2703
526	clonotype1673	IGH	IGHM	Hc	IGHV1-5	None	IGHJ4	CTRYGYDCAMDYW	ko	31	1.67568	1642	88.7568	634	34.2703
527	clonotype1678	IGH	IGHM	Hc	IGHV4-1	None	IGHJ4	CARRYYDYPYAMDYW	ko	41	2.21622	1642	88.7568	634	34.2703
528	clonotype1679	IGH	IGHM	Hc	IGHV1-19	None	IGHJ2	CAGYYDYDGRFDYW	ko	49	2.64865	1642	88.7568	498	26.9189
529	clonotype1680	IGH	IGHM	Hc	IGHV1-15	None	IGHJ3	CTRGNWFAYW	ko	15	0.810811	1642	88.7568	448	24.2162
530	clonotype1682	IGH	IGHM	Hc	IGHV8-8	None	IGHJ3	CARIGDGYFSWFAYW	ko	78	4.21622	1642	88.7568	448	24.2162
531	clonotype1683	IGH	IGHM	Hc	IGHV1-19	None	IGHJ4	CARKDPRGWLLRAMDYW	ko	49	2.64865	1642	88.7568	634	34.2703
532	clonotype1685	IGH	IGHM	Hc	IGHV1-84	None	IGHJ3	CARHGSSYEFAYW	ko	10	0.540541	1642	88.7568	448	24.2162
533	clonotype1687	IGH	IGHM	Hc	IGHV1-26	None	IGHJ3	CSYGSSYVWFAYW	ko	130	7.02703	1642	88.7568	448	24.2162
534	clonotype1689	IGH	IGHM	Hc	IGHV2-9-1	None	IGHJ2	CARNPSYYFDYW	ko	21	1.13514	1642	88.7568	498	26.9189
535	clonotype1690	IGH	IGHM	Hc	IGHV8-12	None	IGHJ1	CARDGYYVWYFDVW	ko	38	2.05405	1642	88.7568	270	14.5946
536	clonotype1693	IGH	IGHM	Hc	IGHV6-3	None	IGHJ1	CTGYLPHSNYLSYWYFDVW	ko	82	4.43243	1642	88.7568	270	14.5946
537	clonotype1695	IGH	IGHM	Hc	IGHV3-6	None	IGHJ4	CARAKETFYAMDYW	ko	135	7.2973	1642	88.7568	634	34.2703
538	clonotype1696	IGH	IGHM	Hc	IGHV5-4	None	IGHJ2	CARSLYYNFDYW	ko	23	1.24324	1642	88.7568	498	26.9189
539	clonotype1697	IGH	IGHM	Hc	IGHV1-22	None	IGHJ4	CARWGGVSYAMDYW	ko	38	2.05405	1642	88.7568	634	34.2703
540	clonotype1698	IGH	IGHM	Hc	IGHV6-3	None	IGHJ4	CTGGGPTGTNYAMDYW	ko	82	4.43243	1642	88.7568	634	34.2703
541	clonotype1699	IGH	IGHM	Hc	IGHV1-39	None	IGHJ4	CARPAYYAMDYW	ko	39	2.10811	1642	88.7568	634	34.2703
542	clonotype1700	IGH	IGHM	Hc	IGHV1-81	None	IGHJ1	CARGGATVVAPYWYFDVW	ko	39	2.10811	1642	88.7568	270	14.5946
543	clonotype1701	IGH	IGHM	Hc	IGHV2-2	None	IGHJ3	CARESRVFYYEETWFAYW	ko	48	2.59459	1642	88.7568	448	24.2162
544	clonotype1702	IGH	IGHM	Hc	IGHV9-3	None	IGHJ4	CARRGTGMDYW	ko	89	4.81081	1642	88.7568	634	34.2703
545	clonotype1703	IGH	IGHM	Hc	IGHV1-26	None	IGHJ1	CATSYYGSSDWYFNVW	ko	130	7.02703	1642	88.7568	270	14.5946
546	clonotype1704	IGH	IGHM	Hc	IGHV2-6	None	IGHJ4	CARHEGDYYGPYAMDYW	ko	12	0.648649	1642	88.7568	634	34.2703
547	clonotype1705	IGH	IGHM	Hc	IGHV1-18	None	IGHJ1	CARLRWLLPYFDVW	ko	47	2.54054	1642	88.7568	270	14.5946
548	clonotype1708	IGH	IGHM	Hc	IGHV1-66	None	IGHJ2	CARGNSNPRGYW	ko	6	0.324324	1642	88.7568	498	26.9189
549	clonotype1709	IGH	IGHM	Hc	IGHV1-72	None	IGHJ4	CARCEDYYGSSLRDAMDYW	ko	21	1.13514	1642	88.7568	634	34.2703
550	clonotype1710	IGH	IGHM	Hc	IGHV1-22	None	IGHJ3	CARWEIGYW	ko	38	2.05405	1642	88.7568	448	24.2162
551	clonotype1711	IGH	IGHM	Hc	IGHV8-12	None	IGHJ4	CARGGYYIFTSYYYAMDYW	ko	38	2.05405	1642	88.7568	634	34.2703
552	clonotype1712	IGH	IGHM	Hc	IGHV1-42	None	IGHJ2	CAKRGIYYGSLDYW	ko	15	0.810811	1642	88.7568	498	26.9189
553	clonotype1713	IGH	IGHM	Hc	IGHV3-4	None	IGHJ4	CARGGVHYDGYSGAMDYW	ko	4	0.216216	1642	88.7568	634	34.2703
554	clonotype1714	IGH	IGHM	Hc	IGHV1-18	None	IGHJ4	CARSLYDYDDYYAMDYW	ko	47	2.54054	1642	88.7568	634	34.2703
555	clonotype1715	IGH	IGHM	Hc	IGHV1-26	None	IGHJ3	CARGSNFSWFAYW	ko	130	7.02703	1642	88.7568	448	24.2162
556	clonotype1716	IGH	IGHM	Hc	IGHV6-3	None	IGHJ4	CTVNCGAMDYW	ko	82	4.43243	1642	88.7568	634	34.2703
557	clonotype1717	IGH	IGHM	Hc	IGHV6-3	None	IGHJ2	CTLLRGYW	ko	82	4.43243	1642	88.7568	498	26.9189
558	clonotype1718	IGH	IGHM	Hc	IGHV1-81	None	IGHJ1	CARVDYWYFDVW	ko	39	2.10811	1642	88.7568	270	14.5946
559	clonotype1720	IGH	IGHM	Hc	IGHV1-80	None	IGHJ2	CARFHYYGSSPDYW	ko	14	0.756757	1642	88.7568	498	26.9189
560	clonotype1723	IGH	IGHM	Hc	IGHV2-2	None	IGHJ4	CARGYDYDGYYAMDYW	ko	48	2.59459	1642	88.7568	634	34.2703
561	clonotype1725	IGH	None	Hc	IGHV1-22	None	IGHJ4	CARSGGHSNNPLLAMDYW	ko	38	2.05405	1642	88.7568	634	34.2703
562	clonotype1727	IGH	IGHM	Hc	IGHV1-53	None	IGHJ3	CAREPWGSQFAYW	ko	29	1.56757	1642	88.7568	448	24.2162
563	clonotype1728	IGH	IGHM	Hc	IGHV5-4	None	IGHJ4	CANMITSSYYAMDYW	ko	23	1.24324	1642	88.7568	634	34.2703
564	clonotype1729	IGH	IGHM	Hc	IGHV15-2	None	IGHJ4	CARDSNPHYYAMDYW	ko	13	0.702703	1642	88.7568	634	34.2703
565	clonotype1730	IGH	IGHM	Hc	IGHV3-6	None	IGHJ3	CARDSSGPVAYW	ko	135	7.2973	1642	88.7568	448	24.2162
566	clonotype1731	IGH	IGHM	Hc	IGHV1-53	None	IGHJ4	CARSHYDYDGYAMDYW	ko	29	1.56757	1642	88.7568	634	34.2703
567	clonotype1732	IGH	IGHM	Hc	IGHV1-82	IGHD1-1	IGHJ3	CARTYYGSSYGFGYW	ko	21	1.13514	150	8.10811	448	24.2162
568	clonotype1734	IGH	IGHM	Hc	IGHV10-1	None	IGHJ3	CVRQDPVYYDYGLFAYW	ko	27	1.45946	1642	88.7568	448	24.2162
569	clonotype1735	IGH	IGHM	Hc	IGHV13-2	None	IGHJ4	CSRDTPMDYW	ko	18	0.972973	1642	88.7568	634	34.2703
570	clonotype1737	IGH	IGHM	Hc	IGHV2-9-1	None	IGHJ4	CARIYYDYGLLDPYYYAMDYW	ko	21	1.13514	1642	88.7568	634	34.2703
571	clonotype1739	IGH	IGHM	Hc	IGHV3-6	None	IGHJ1	CARDKVATNCWYFDVW	ko	135	7.2973	1642	88.7568	270	14.5946
572	clonotype1740	IGH	None	Hc	IGHV1-26	None	IGHJ2	CARWAYYSYYDYFDYW	ko	130	7.02703	1642	88.7568	498	26.9189
573	clonotype1741	IGH	IGHM	Hc	IGHV3-6	None	IGHJ4	CARDSYYAMDYW	ko	135	7.2973	1642	88.7568	634	34.2703
574	clonotype1742	IGH	IGHM	Hc	IGHV1-63	None	IGHJ1	CARLIFDYDVLNWYFDVW	ko	7	0.378378	1642	88.7568	270	14.5946
575	clonotype1743	IGH	None	Hc	IGHV9-3	None	IGHJ1	CARSSPYWYFDVW	ko	89	4.81081	1642	88.7568	270	14.5946
576	clonotype1744	IGH	IGHM	Hc	IGHV2-9-1	None	IGHJ3	CARNLYDYDGFAYW	ko	21	1.13514	1642	88.7568	448	24.2162
577	clonotype1746	IGH	IGHM	Hc	IGHV1-72	None	IGHJ3	CARSGYYYGSPWFAYW	ko	21	1.13514	1642	88.7568	448	24.2162
578	clonotype1747	IGH	IGHM	Hc	IGHV1-55	None	IGHJ3	CARVDYGSSPFAYW	ko	14	0.756757	1642	88.7568	448	24.2162
579	clonotype1748	IGH	IGHM	Hc	IGHV1-9	None	IGHJ4	CARGGIYSTRVYYYAMDYW	ko	27	1.45946	1642	88.7568	634	34.2703
580	clonotype1749	IGH	None	Hc	IGHV1-74	None	IGHJ4	CAINQDFPDAMDYW	ko	13	0.702703	1642	88.7568	634	34.2703
581	clonotype1750	IGH	IGHM	Hc	IGHV6-3	None	IGHJ2	CTYYGSSYGYYFDYW	ko	82	4.43243	1642	88.7568	498	26.9189
582	clonotype1751	IGH	IGHM	Hc	IGHV1-53	None	IGHJ4	CARLDGYYMPAMDYW	ko	29	1.56757	1642	88.7568	634	34.2703
583	clonotype1752	IGH	IGHM	Hc	IGHV6-3	None	IGHJ4	CTGKLGRAMDYW	ko	82	4.43243	1642	88.7568	634	34.2703
584	clonotype1753	IGH	IGHM	Hc	IGHV1-74	None	IGHJ2	CAIRGDWGYYGSPYFDYW	ko	13	0.702703	1642	88.7568	498	26.9189
585	clonotype1754	IGH	IGHM	Hc	IGHV1-15	None	IGHJ3	CTREMRLLQFAYW	ko	15	0.810811	1642	88.7568	448	24.2162
586	clonotype1756	IGH	IGHM	Hc	IGHV1-12	None	IGHJ4	CARYGYVGAMDYW	ko	12	0.648649	1642	88.7568	634	34.2703
587	clonotype1759	IGH	IGHM	Hc	IGHV5-6	None	IGHJ3	CARHALFPFAYW	ko	19	1.02703	1642	88.7568	448	24.2162
588	clonotype1760	IGH	IGHM	Hc	IGHV4-1	None	IGHJ3	CARPEVLRWFAYW	ko	41	2.21622	1642	88.7568	448	24.2162
589	clonotype1761	IGH	IGHM	Hc	IGHV2-3	None	IGHJ4	CAKSLDGYYASWDAMDYW	ko	16	0.864865	1642	88.7568	634	34.2703
590	clonotype1762	IGH	IGHM	Hc	IGHV8-8	None	IGHJ3	CARIGLNWGFAYW	ko	78	4.21622	1642	88.7568	448	24.2162
591	clonotype1763	IGH	IGHM	Hc	IGHV5-9	None	IGHJ1	CASLYGSREYFDVW	ko	7	0.378378	1642	88.7568	270	14.5946
592	clonotype1764	IGH	IGHM	Hc	IGHV3-6	None	IGHJ3	CARVYDGYAWFAYW	ko	135	7.2973	1642	88.7568	448	24.2162
593	clonotype1765	IGH	IGHM	Hc	IGHV5-4	None	IGHJ3	CARDHYDYDGWFAYW	ko	23	1.24324	1642	88.7568	448	24.2162
594	clonotype1766	IGH	IGHM	Hc	IGHV9-3	None	IGHJ3	CARDSSGYAWFAYW	ko	89	4.81081	1642	88.7568	448	24.2162
595	clonotype1767	IGH	IGHM	Hc	IGHV5-6	None	IGHJ4	CARDYGSSYDAMDYW	ko	19	1.02703	1642	88.7568	634	34.2703
596	clonotype1768	IGH	IGHM	Hc	IGHV1-62-2	None	IGHJ1	CARHEDLTPYRYFDVW	ko	16	0.864865	1642	88.7568	270	14.5946
597	clonotype1769	IGH	IGHM	Hc	IGHV3-6	None	IGHJ2	CARQNYERDFDYW	ko	135	7.2973	1642	88.7568	498	26.9189
598	clonotype1770	IGH	None	Hc	IGHV1-64	None	IGHJ3	CARWDWFAYW	ko	36	1.94595	1642	88.7568	448	24.2162
599	clonotype1771	IGH	IGHM	Hc	IGHV2-3	None	IGHJ4	CAKEELGRNYAMDYW	ko	16	0.864865	1642	88.7568	634	34.2703
600	clonotype1772	IGH	IGHM	Hc	IGHV1-26	None	IGHJ3	CARSTGTGAWFAYW	ko	130	7.02703	1642	88.7568	448	24.2162
601	clonotype1774	IGH	IGHM	Hc	IGHV1-19	None	IGHJ4	CARWGNRYAMDYW	ko	49	2.64865	1642	88.7568	634	34.2703
602	clonotype1775	IGH	IGHM	Hc	IGHV9-2	None	IGHJ2	CARGGGNYLCYFDYW	ko	9	0.486486	1642	88.7568	498	26.9189
603	clonotype1776	IGH	IGHM	Hc	IGHV7-1	None	IGHJ4	CARDASPITTVVENYAMDYW	ko	22	1.18919	1642	88.7568	634	34.2703
604	clonotype1778	IGH	IGHM	Hc	IGHV3-6	None	IGHJ4	CAREAGWDYW	ko	135	7.2973	1642	88.7568	634	34.2703
605	clonotype1779	IGH	None	Hc	IGHV14-2	None	IGHJ4	CARYYGSSYAMDYW	ko	14	0.756757	1642	88.7568	634	34.2703
606	clonotype1780	IGH	IGHM	Hc	IGHV1-22	None	IGHJ3	CASGYDYDNWFAYW	ko	38	2.05405	1642	88.7568	448	24.2162
607	clonotype1782	IGH	IGHM	Hc	IGHV1-54	None	IGHJ4	CARFYYDYYYYAMDYW	ko	15	0.810811	1642	88.7568	634	34.2703
608	clonotype1783	IGH	IGHM	Hc	IGHV1-22	None	IGHJ4	CAKGGYAMDYW	ko	38	2.05405	1642	88.7568	634	34.2703
609	clonotype1784	IGH	None	Hc	IGHV1-26	None	IGHJ2	CARATTVDPYYFDYW	ko	130	7.02703	1642	88.7568	498	26.9189
610	clonotype1785	IGH	None	Hc	IGHV9-3	None	IGHJ4	CARVGGSSLYYAMDYW	ko	89	4.81081	1642	88.7568	634	34.2703
611	clonotype1786	IGH	IGHM	Hc	IGHV1-18	None	IGHJ4	CARRYGSSYDYAMDYW	ko	47	2.54054	1642	88.7568	634	34.2703
612	clonotype1787	IGH	IGHM	Hc	IGHV9-3	None	IGHJ1	CARDFDSYFDVW	ko	89	4.81081	1642	88.7568	270	14.5946
613	clonotype1788	IGH	IGHM	Hc	IGHV1-78	None	IGHJ4	CARWDDGYSYAMDYW	ko	26	1.40541	1642	88.7568	634	34.2703
614	clonotype1789	IGH	IGHM	Hc	IGHV1-58	None	IGHJ3	CARSFAYW	ko	15	0.810811	1642	88.7568	448	24.2162
615	clonotype1790	IGH	IGHM	Hc	IGHV8-8	None	IGHJ3	CARIYYSNYLFAYW	ko	78	4.21622	1642	88.7568	448	24.2162
616	clonotype1791	IGH	IGHM	Hc	IGHV5-9-1	None	IGHJ3	CTREANWGRFAYW	ko	12	0.648649	1642	88.7568	448	24.2162
617	clonotype1792	IGH	IGHM	Hc	IGHV8-8	IGHD3-2	IGHJ3	CARITDSSGYPWFAYW	ko	78	4.21622	9	0.486486	448	24.2162
618	clonotype1793	IGH	IGHM	Hc	IGHV1-42	None	IGHJ3	CARESAWFAYW	ko	15	0.810811	1642	88.7568	448	24.2162
619	clonotype1794	IGH	IGHM	Hc	IGHV3-6	None	IGHJ4	CARDQRGHDYEGDYYAMDYW	ko	135	7.2973	1642	88.7568	634	34.2703
620	clonotype1795	IGH	IGHM	Hc	IGHV1-80	None	IGHJ2	CARSTVVATRNYFDYW	ko	14	0.756757	1642	88.7568	498	26.9189
621	clonotype1796	IGH	IGHM	Hc	IGHV9-3	None	IGHJ2	CAREDRWPYFAYW	ko	89	4.81081	1642	88.7568	498	26.9189
622	clonotype1797	IGH	IGHM	Hc	IGHV1-18	None	IGHJ3	CARREIWYGSSLFAYW	ko	47	2.54054	1642	88.7568	448	24.2162
623	clonotype1798	IGH	None	Hc	IGHV6-6	None	IGHJ2	CTVYYYGIPFDYW	ko	25	1.35135	1642	88.7568	498	26.9189
624	clonotype1799	IGH	IGHM	Hc	IGHV4-1	None	IGHJ3	CARPDYGPAWFAYW	ko	41	2.21622	1642	88.7568	448	24.2162
625	clonotype1800	IGH	IGHM	Hc	IGHV1-5	None	IGHJ2	CTRWGLRAVVATPGHFDYW	ko	31	1.67568	1642	88.7568	498	26.9189
626	clonotype1801	IGH	IGHM	Hc	IGHV6-6	None	IGHJ3	CTRSLFAYW	ko	25	1.35135	1642	88.7568	448	24.2162
627	clonotype1802	IGH	IGHM	Hc	IGHV1-19	None	IGHJ2	CARREDYDYFDYW	ko	49	2.64865	1642	88.7568	498	26.9189
628	clonotype1803	IGH	IGHM	Hc	IGHV9-3	None	IGHJ3	CARAYW	ko	89	4.81081	1642	88.7568	448	24.2162
629	clonotype1805	IGH	IGHM	Hc	IGHV1-75	None	IGHJ1	CARVRTGTAYWYFDVW	ko	36	1.94595	1642	88.7568	270	14.5946
630	clonotype1806	IGH	IGHM	Hc	IGHV6-6	None	IGHJ4	CTRITTVPYAMDYW	ko	25	1.35135	1642	88.7568	634	34.2703
631	clonotype1807	IGH	IGHM	Hc	IGHV2-2	IGHD1-1	IGHJ2	CARSTTVVATFDYW	ko	48	2.59459	150	8.10811	498	26.9189
632	clonotype1808	IGH	IGHM	Hc	IGHV4-1	None	IGHJ4	CARRDYGSSQFSYYAMDYW	ko	41	2.21622	1642	88.7568	634	34.2703
633	clonotype1809	IGH	IGHM	Hc	IGHV14-4	None	IGHJ3	CTTSRDGAWFAYW	ko	24	1.2973	1642	88.7568	448	24.2162
634	clonotype1810	IGH	IGHM	Hc	IGHV1-75	None	IGHJ2	CARDYSKW	ko	36	1.94595	1642	88.7568	498	26.9189
635	clonotype1811	IGH	IGHM	Hc	IGHV1-15	None	IGHJ2	CTRERSFTTVVDVFDYW	ko	15	0.810811	1642	88.7568	498	26.9189
636	clonotype1812	IGH	IGHM	Hc	IGHV13-2	None	IGHJ3	CSRDGNYGGRPWFAYW	ko	18	0.972973	1642	88.7568	448	24.2162
637	clonotype1813	IGH	IGHM	Hc	IGHV2-2	None	IGHJ4	CARNKDLVTTVVPYAMDYW	ko	48	2.59459	1642	88.7568	634	34.2703
638	clonotype1817	IGH	IGHM	Hc	IGHV1-54	None	IGHJ4	CARRTMVTTEAMDYW	ko	15	0.810811	1642	88.7568	634	34.2703
639	clonotype1818	IGH	IGHM	Hc	IGHV8-8	None	IGHJ3	CARIPYGNSSWFAYW	ko	78	4.21622	1642	88.7568	448	24.2162
640	clonotype1819	IGH	IGHM	Hc	IGHV1-5	None	IGHJ3	CTRPFITTVGFAYW	ko	31	1.67568	1642	88.7568	448	24.2162
641	clonotype1820	IGH	IGHM	Hc	IGHV8-5	None	IGHJ3	CAQIYGYYDWFAYW	ko	6	0.324324	1642	88.7568	448	24.2162
642	clonotype1821	IGH	IGHM	Hc	IGHV1-19	IGHD1-1	IGHJ2	CARIYYYGSSYVFDYW	ko	49	2.64865	150	8.10811	498	26.9189
643	clonotype1822	IGH	IGHM	Hc	IGHV1-49	None	IGHJ4	CARSLGYAMDYW	ko	4	0.216216	1642	88.7568	634	34.2703
644	clonotype1823	IGH	IGHM	Hc	IGHV1-69	None	IGHJ2	CARGGWLLRFDYW	ko	15	0.810811	1642	88.7568	498	26.9189
645	clonotype1825	IGH	IGHM	Hc	IGHV8-8	None	IGHJ4	CARIEGLTVGGDYAMDYW	ko	78	4.21622	1642	88.7568	634	34.2703
646	clonotype1826	IGH	IGHM	Hc	IGHV1-81	None	IGHJ3	CATIYYGSPWFAYW	ko	39	2.10811	1642	88.7568	448	24.2162
647	clonotype1827	IGH	IGHM	Hc	IGHV5-16	None	IGHJ1	CAREAGGSEGWYFDVW	ko	29	1.56757	1642	88.7568	270	14.5946
648	clonotype1828	IGH	IGHM	Hc	IGHV3-6	None	IGHJ4	CAIIYDGYSLDYW	ko	135	7.2973	1642	88.7568	634	34.2703
649	clonotype1830	IGH	IGHM	Hc	IGHV8-8	None	IGHJ3	CARVIYYDYLFAYW	ko	78	4.21622	1642	88.7568	448	24.2162
650	clonotype1831	IGH	IGHM	Hc	IGHV2-3	None	IGHJ3	CAKPGEGGFAYW	ko	16	0.864865	1642	88.7568	448	24.2162
651	clonotype1832	IGH	IGHM	Hc	IGHV9-4	None	IGHJ1	CASYGGYFDVW	ko	17	0.918919	1642	88.7568	270	14.5946
652	clonotype1833	IGH	IGHM	Hc	IGHV1-71	None	IGHJ4	CARHEDTPWTAQATSLAMDYW	ko	11	0.594595	1642	88.7568	634	34.2703
653	clonotype1834	IGH	IGHM	Hc	IGHV1-39	None	IGHJ4	CARSTVVAPPYAMDYW	ko	39	2.10811	1642	88.7568	634	34.2703
654	clonotype1835	IGH	IGHM	Hc	IGHV5-16	IGHD2-5	IGHJ3	CARGGSYYSNYDWFAYW	ko	29	1.56757	12	0.648649	448	24.2162
655	clonotype1837	IGH	IGHM	Hc	IGHV3-6	None	IGHJ4	CARGIYYDYERGYAMDYW	ko	135	7.2973	1642	88.7568	634	34.2703
656	clonotype1839	IGH	IGHM	Hc	IGHV1-26	None	IGHJ4	CALSYAMDYW	ko	130	7.02703	1642	88.7568	634	34.2703
657	clonotype1840	IGH	IGHM	Hc	IGHV8-5	None	IGHJ2	CAQIAGYGSFDYW	ko	6	0.324324	1642	88.7568	498	26.9189
658	clonotype1841	IGH	IGHM	Hc	IGHV1-19	None	IGHJ3	CAIYDYGFAYW	ko	49	2.64865	1642	88.7568	448	24.2162
659	clonotype1843	IGH	IGHM	Hc	IGHV1-5	None	IGHJ2	CTRRGTTVVRDFDYW	ko	31	1.67568	1642	88.7568	498	26.9189
660	clonotype1844	IGH	None	Hc	IGHV1-69	None	IGHJ2	CARSRGLYYGNQYYFDYW	ko	15	0.810811	1642	88.7568	498	26.9189
661	clonotype1845	IGH	IGHM	Hc	IGHV1-9	None	IGHJ3	CARDGAYW	ko	27	1.45946	1642	88.7568	448	24.2162
662	clonotype1846	IGH	IGHM	Hc	IGHV1-15	None	IGHJ4	CTPTIVTGRKLYAMDYW	ko	15	0.810811	1642	88.7568	634	34.2703
663	clonotype1848	IGH	IGHM	Hc	IGHV1-9	None	IGHJ4	CAGRNPPYYAMDYW	ko	27	1.45946	1642	88.7568	634	34.2703
664	clonotype1850	IGH	IGHM	Hc	IGHV1-22	None	IGHJ4	CARKGAHTTTGDYYAMDYW	ko	38	2.05405	1642	88.7568	634	34.2703
665	clonotype1851	IGH	IGHM	Hc	IGHV3-6	IGHD1-1	IGHJ4	CARDGITTVVASYYYAMDYW	ko	135	7.2973	150	8.10811	634	34.2703
666	clonotype1852	IGH	IGHM	Hc	IGHV9-1	None	IGHJ3	CQGAYW	ko	18	0.972973	1642	88.7568	448	24.2162
667	clonotype1853	IGH	IGHM	Hc	IGHV1-66	None	IGHJ3	CAEDYPFAYW	ko	6	0.324324	1642	88.7568	448	24.2162
668	clonotype1854	IGH	IGHM	Hc	IGHV3-1	None	IGHJ3	CARGGAFYYDYEEAWFAYW	ko	21	1.13514	1642	88.7568	448	24.2162
669	clonotype1855	IGH	IGHM	Hc	IGHV1-26	None	IGHJ1	CARIPHYYGSLWYFDVW	ko	130	7.02703	1642	88.7568	270	14.5946
670	clonotype1856	IGH	IGHM	Hc	IGHV3-6	None	IGHJ3	CARRADGSEAWFAYW	ko	135	7.2973	1642	88.7568	448	24.2162
671	clonotype1857	IGH	IGHM	Hc	IGHV1-26	None	IGHJ4	CARNGNFPMDYW	ko	130	7.02703	1642	88.7568	634	34.2703
672	clonotype1858	IGH	None	Hc	IGHV13-2	None	IGHJ4	CSREGPTARGDYW	ko	18	0.972973	1642	88.7568	634	34.2703
673	clonotype1859	IGH	IGHM	Hc	IGHV1-26	None	IGHJ1	CASLLWLPYWYFDVW	ko	130	7.02703	1642	88.7568	270	14.5946
674	clonotype1860	IGH	IGHM	Hc	IGHV15-2	None	IGHJ1	CARSPPYYGSSSWYFDVW	ko	13	0.702703	1642	88.7568	270	14.5946
675	clonotype1862	IGH	IGHM	Hc	IGHV1-15	None	IGHJ2	CTRSSTTVPPCDYW	ko	15	0.810811	1642	88.7568	498	26.9189
676	clonotype1863	IGH	IGHM	Hc	IGHV6-3	None	IGHJ3	CTDNWEPDW	ko	82	4.43243	1642	88.7568	448	24.2162
677	clonotype1864	IGH	IGHM	Hc	IGHV5-16	None	IGHJ4	CARESYGNRAMDYW	ko	29	1.56757	1642	88.7568	634	34.2703
678	clonotype1865	IGH	IGHM	Hc	IGHV5-6	None	IGHJ2	CARHVIYDGYHRDYFDYW	ko	19	1.02703	1642	88.7568	498	26.9189
679	clonotype1866	IGH	IGHM	Hc	IGHV5-6	None	IGHJ4	CARQKITPYYAMDYW	ko	19	1.02703	1642	88.7568	634	34.2703
680	clonotype1867	IGH	IGHM	Hc	IGHV1-50	None	IGHJ2	CAREDYYHYW	ko	10	0.540541	1642	88.7568	498	26.9189
681	clonotype1868	IGH	IGHM	Hc	IGHV1-55	None	IGHJ4	CAREATVGYAMDYW	ko	14	0.756757	1642	88.7568	634	34.2703
682	clonotype1869	IGH	None	Hc	IGHV10-1	None	IGHJ3	CVGGSNAWFAYW	ko	27	1.45946	1642	88.7568	448	24.2162
683	clonotype1871	IGH	IGHM	Hc	IGHV1-18	IGHD2-3	IGHJ3	CARGAIYDGYYVPFAYW	ko	47	2.54054	7	0.378378	448	24.2162
684	clonotype1872	IGH	IGHM	Hc	IGHV8-8	IGHD1-1	IGHJ1	CARIEIYYYGSSSHWYFDVW	ko	78	4.21622	150	8.10811	270	14.5946
685	clonotype1873	IGH	IGHM	Hc	IGHV1-26	None	IGHJ4	CARGDYDVGAMDYW	ko	130	7.02703	1642	88.7568	634	34.2703
686	clonotype1874	IGH	IGHM	Hc	IGHV1-58	None	IGHJ2	CAKIYYGNGGLYYFDYW	ko	15	0.810811	1642	88.7568	498	26.9189
687	clonotype1875	IGH	None	Hc	IGHV1-22	None	IGHJ3	CARGGAWFAYW	ko	38	2.05405	1642	88.7568	448	24.2162
688	clonotype1876	IGH	None	Hc	IGHV9-3	None	IGHJ4	CARGGGGSYYGSPPYAMDYW	ko	89	4.81081	1642	88.7568	634	34.2703
689	clonotype1877	IGH	None	Hc	IGHV1-75	None	IGHJ2	CARRYFDYW	ko	36	1.94595	1642	88.7568	498	26.9189
690	clonotype1878	IGH	IGHM	Hc	IGHV1-47	None	IGHJ4	CARGRYDYDLGAMDYW	ko	8	0.432432	1642	88.7568	634	34.2703
691	clonotype1879	IGH	IGHM	Hc	IGHV1-61	None	IGHJ4	CASSLWYYYAMDYW	ko	5	0.27027	1642	88.7568	634	34.2703
692	clonotype1880	IGH	IGHM	Hc	IGHV9-4	None	IGHJ4	CAREIGNSYYYAMDYW	ko	17	0.918919	1642	88.7568	634	34.2703
693	clonotype1881	IGH	IGHM	Hc	IGHV1-18	IGHD1-1	IGHJ2	CARSLYYYGSSYGYFDYW	ko	47	2.54054	150	8.10811	498	26.9189
694	clonotype1882	IGH	IGHM	Hc	IGHV14-3	None	IGHJ2	CATERITTVVEGSLDYW	ko	7	0.378378	1642	88.7568	498	26.9189
695	clonotype1885	IGH	IGHM	Hc	IGHV3-6	None	IGHJ1	CAREGLVSWYFDVW	ko	135	7.2973	1642	88.7568	270	14.5946
696	clonotype1886	IGH	None	Hc	IGHV1-75	None	IGHJ3	CARCDGYYGFAYW	ko	36	1.94595	1642	88.7568	448	24.2162
697	clonotype1887	IGH	IGHM	Hc	IGHV1-12	None	IGHJ3	CARNSNYLFAYW	ko	12	0.648649	1642	88.7568	448	24.2162
698	clonotype1888	IGH	IGHM	Hc	IGHV1-26	None	IGHJ4	CANNYARGYAMDYW	ko	130	7.02703	1642	88.7568	634	34.2703
699	clonotype1889	IGH	IGHM	Hc	IGHV1-26	None	IGHJ2	CASQREPEGYYFDYW	ko	130	7.02703	1642	88.7568	498	26.9189
700	clonotype1890	IGH	IGHM	Hc	IGHV2-2	IGHD2-4	IGHJ3	CARPLYYDYDEGFAYW	ko	48	2.59459	18	0.972973	448	24.2162
701	clonotype1892	IGH	IGHM	Hc	IGHV1-75	None	IGHJ4	CARCPLGLWRLRVYAMDYW	ko	36	1.94595	1642	88.7568	634	34.2703
702	clonotype1894	IGH	IGHM	Hc	IGHV1-82	None	IGHJ4	CARGGLYDYGYYAMDYW	ko	21	1.13514	1642	88.7568	634	34.2703
703	clonotype1895	IGH	IGHM	Hc	IGHV6-3	None	IGHJ4	CTGAPSHW	ko	82	4.43243	1642	88.7568	634	34.2703
704	clonotype1896	IGH	IGHM	Hc	IGHV1-26	None	IGHJ4	CARDGYPYYYAMDYW	ko	130	7.02703	1642	88.7568	634	34.2703
705	clonotype1897	IGH	IGHM	Hc	IGHV6-3	IGHD2-4	IGHJ1	CTLYYDYDWYFDVW	ko	82	4.43243	18	0.972973	270	14.5946
706	clonotype1898	IGH	IGHM	Hc	IGHV1-78	IGHD1-1	IGHJ2	CARDSYYYGSSYNYW	ko	26	1.40541	150	8.10811	498	26.9189
707	clonotype1899	IGH	IGHM	Hc	IGHV9-4	None	IGHJ2	CARGLGREGYFDYW	ko	17	0.918919	1642	88.7568	498	26.9189
708	clonotype1901	IGH	IGHM	Hc	IGHV9-3	None	IGHJ2	CARSKRSFITTVDYYFDYW	ko	89	4.81081	1642	88.7568	498	26.9189
709	clonotype1902	IGH	IGHM	Hc	IGHV6-3	None	IGHJ4	CTPLAVVAGDYAMDYW	ko	82	4.43243	1642	88.7568	634	34.2703
710	clonotype1903	IGH	IGHM	Hc	IGHV5-9	None	IGHJ3	CARQRGNDWFAYW	ko	7	0.378378	1642	88.7568	448	24.2162
711	clonotype1904	IGH	IGHM	Hc	IGHV7-3	None	IGHJ2	CARYWDYFDYW	ko	27	1.45946	1642	88.7568	498	26.9189
712	clonotype1905	IGH	IGHM	Hc	IGHV2-2	None	IGHJ4	CARNELGAMDYW	ko	48	2.59459	1642	88.7568	634	34.2703
713	clonotype1906	IGH	IGHM	Hc	IGHV1-72	None	IGHJ2	CARFDYGSPWDYW	ko	21	1.13514	1642	88.7568	498	26.9189
714	clonotype1907	IGH	IGHM	Hc	IGHV1-81	None	IGHJ4	CATTMVTHYAMDYW	ko	39	2.10811	1642	88.7568	634	34.2703
715	clonotype1908	IGH	IGHM	Hc	IGHV3-6	None	IGHJ2	CARVSGDGYYGDYFDYW	ko	135	7.2973	1642	88.7568	498	26.9189
716	clonotype1909	IGH	IGHM	Hc	IGHV14-2	None	IGHJ2	CARGYYYGSSPYYFDYW	ko	14	0.756757	1642	88.7568	498	26.9189
717	clonotype1910	IGH	IGHM	Hc	IGHV9-1	IGHD1-1	IGHJ2	CVILFITTVVATGFDYW	ko	18	0.972973	150	8.10811	498	26.9189
718	clonotype1911	IGH	IGHM	Hc	IGHV1-26	None	IGHJ4	CARSRLGAMDYW	ko	130	7.02703	1642	88.7568	634	34.2703
719	clonotype1912	IGH	IGHM	Hc	IGHV1-54	None	IGHJ2	CAREGGLRRGDFDYW	ko	15	0.810811	1642	88.7568	498	26.9189
720	clonotype1914	IGH	IGHM	Hc	IGHV1-78	None	IGHJ2	CARGGYIHFDYW	ko	26	1.40541	1642	88.7568	498	26.9189
721	clonotype1915	IGH	IGHM	Hc	IGHV1-82	IGHD1-1	IGHJ3	CARTYYGSSYGFAYW	ko	21	1.13514	150	8.10811	448	24.2162
722	clonotype1918	IGH	IGHM	Hc	IGHV3-6	None	IGHJ4	CARWLVAMDYW	ko	135	7.2973	1642	88.7568	634	34.2703
723	clonotype1919	IGH	IGHM	Hc	IGHV5-9	None	IGHJ4	CARQNYGSSYAMDYW	ko	7	0.378378	1642	88.7568	634	34.2703
724	clonotype1920	IGH	IGHM	Hc	IGHV1-63	None	IGHJ4	CARVGLRFYYYAMDYW	ko	7	0.378378	1642	88.7568	634	34.2703
725	clonotype1921	IGH	None	Hc	IGHV9-1	None	IGHJ1	CVSGGAQATSRYFDVW	ko	18	0.972973	1642	88.7568	270	14.5946
726	clonotype1922	IGH	None	Hc	IGHV7-3	None	IGHJ3	CARSSYGSSSWFAYW	ko	27	1.45946	1642	88.7568	448	24.2162
727	clonotype1926	IGH	IGHM	Hc	IGHV3-6	None	IGHJ1	CARYFDVW	ko	135	7.2973	1642	88.7568	270	14.5946
728	clonotype1927	IGH	IGHM	Hc	IGHV6-3	None	IGHJ2	CTGDGSRFDYW	ko	82	4.43243	1642	88.7568	498	26.9189
729	clonotype1928	IGH	IGHM	Hc	IGHV2-2	None	IGHJ4	CASPHYYGSSYYYAMDYW	ko	48	2.59459	1642	88.7568	634	34.2703
730	clonotype1929	IGH	IGHM	Hc	IGHV1-26	None	IGHJ4	CARGSRDYYAMDYW	ko	130	7.02703	1642	88.7568	634	34.2703
731	clonotype1930	IGH	IGHM	Hc	IGHV3-6	None	IGHJ2	CARILSLYGRFDYW	ko	135	7.2973	1642	88.7568	498	26.9189
732	clonotype1932	IGH	IGHM	Hc	IGHV15-2	None	IGHJ3	CARGDYDYDFAYW	ko	13	0.702703	1642	88.7568	448	24.2162
733	clonotype1933	IGH	IGHM	Hc	IGHV8-8	None	IGHJ4	CARIAYSSYAMDYW	ko	78	4.21622	1642	88.7568	634	34.2703
734	clonotype1934	IGH	IGHM	Hc	IGHV9-1	None	IGHJ4	CGTRDYDYDYYAMDYW	ko	18	0.972973	1642	88.7568	634	34.2703
735	clonotype1935	IGH	IGHM	Hc	IGHV3-6	None	IGHJ4	CAKEEGPAGGPYYYAMDYW	ko	135	7.2973	1642	88.7568	634	34.2703
736	clonotype1936	IGH	IGHM	Hc	IGHV1-39	None	IGHJ3	CARGENYGNFPVAYW	ko	39	2.10811	1642	88.7568	448	24.2162
737	clonotype1938	IGH	IGHM	Hc	IGHV3-1	IGHD1-1	IGHJ1	CARDSPYYGSSYWYFDVW	ko	21	1.13514	150	8.10811	270	14.5946
738	clonotype1939	IGH	IGHM	Hc	IGHV15-2	None	IGHJ2	CARGSSFLFDYW	ko	13	0.702703	1642	88.7568	498	26.9189
739	clonotype1940	IGH	IGHM	Hc	IGHV1-22	None	IGHJ4	CAIVTRLYYYAMDYW	ko	38	2.05405	1642	88.7568	634	34.2703
740	clonotype1941	IGH	IGHM	Hc	IGHV6-3	None	IGHJ1	CTGEGYWYFDVW	ko	82	4.43243	1642	88.7568	270	14.5946
741	clonotype1942	IGH	IGHM	Hc	IGHV6-3	None	IGHJ4	CTETTGREDYYAMDYW	ko	82	4.43243	1642	88.7568	634	34.2703
742	clonotype1946	IGH	IGHM	Hc	IGHV8-12	None	IGHJ1	CAHVYDYGGYFDVW	ko	38	2.05405	1642	88.7568	270	14.5946
743	clonotype1947	IGH	IGHM	Hc	IGHV14-4	None	IGHJ2	CTTLIAVGYYFDYW	ko	24	1.2973	1642	88.7568	498	26.9189
744	clonotype1948	IGH	IGHM	Hc	IGHV1-75	IGHD1-1	IGHJ1	CARVLYYGSSYWYFDVW	ko	36	1.94595	150	8.10811	270	14.5946
745	clonotype1949	IGH	IGHM	Hc	IGHV8-8	None	IGHJ4	CARIAGAYYSNLYAMDYW	ko	78	4.21622	1642	88.7568	634	34.2703
746	clonotype1951	IGH	IGHM	Hc	IGHV14-1	None	IGHJ3	CTTGYYGSSAWFAYW	ko	3	0.162162	1642	88.7568	448	24.2162
747	clonotype1952	IGH	IGHM	Hc	IGHV2-6	None	IGHJ3	CARHSDGNYGWFAYW	ko	12	0.648649	1642	88.7568	448	24.2162
748	clonotype1953	IGH	None	Hc	IGHV1-75	None	IGHJ3	CARSFYYGNSRFAYW	ko	36	1.94595	1642	88.7568	448	24.2162
749	clonotype1954	IGH	IGHM	Hc	IGHV1-61	IGHD1-1	IGHJ2	CARWAPDYYGSSYDYW	ko	5	0.27027	150	8.10811	498	26.9189
750	clonotype1955	IGH	IGHM	Hc	IGHV5-17	None	IGHJ1	CARGTTVVDWYFDVW	ko	17	0.918919	1642	88.7568	270	14.5946
751	clonotype1956	IGH	IGHM	Hc	IGHV1-76	IGHD1-1	IGHJ2	CARSIPIYYYGSSYFDYW	ko	13	0.702703	150	8.10811	498	26.9189
752	clonotype1957	IGH	IGHM	Hc	IGHV5-9-1	None	IGHJ1	CTRDDDYEAYWYFDVW	ko	12	0.648649	1642	88.7568	270	14.5946
753	clonotype1958	IGH	IGHM	Hc	IGHV5-16	None	IGHJ4	CARGDGGGYYYAMDYW	ko	29	1.56757	1642	88.7568	634	34.2703
754	clonotype1959	IGH	IGHM	Hc	IGHV1-20	None	IGHJ1	CARRGTVPCYWYFDVW	ko	7	0.378378	1642	88.7568	270	14.5946
755	clonotype1960	IGH	IGHM	Hc	IGHV5-2	None	IGHJ4	CARHGGLMDYW	ko	4	0.216216	1642	88.7568	634	34.2703
756	clonotype1961	IGH	IGHM	Hc	IGHV1-18	None	IGHJ4	CARKNFYYGNYRNAMDYW	ko	47	2.54054	1642	88.7568	634	34.2703
757	clonotype1962	IGH	IGHM	Hc	IGHV1-77	None	IGHJ4	CARPRLTGKRYYAMDYW	ko	5	0.27027	1642	88.7568	634	34.2703
758	clonotype1963	IGH	IGHM	Hc	IGHV9-3	None	IGHJ1	CARFRITTVVDHYWYFDVW	ko	89	4.81081	1642	88.7568	270	14.5946
759	clonotype1964	IGH	IGHM	Hc	IGHV1-20	None	IGHJ3	CARSGYYGSSPFAYW	ko	7	0.378378	1642	88.7568	448	24.2162
760	clonotype1965	IGH	IGHM	Hc	IGHV9-3	None	IGHJ2	CAREGSSSYYFDYW	ko	89	4.81081	1642	88.7568	498	26.9189
761	clonotype1966	IGH	IGHM	Hc	IGHV2-9-1	None	IGHJ3	CARNDGDYAWFAYW	ko	21	1.13514	1642	88.7568	448	24.2162
762	clonotype1967	IGH	IGHM	Hc	IGHV1-26	IGHD1-1	IGHJ4	CARVTTVVATSNYYAMDYW	ko	130	7.02703	150	8.10811	634	34.2703
763	clonotype1969	IGH	IGHM	Hc	IGHV1-7	None	IGHJ3	CVFISIRTGFAYW	ko	3	0.162162	1642	88.7568	448	24.2162
764	clonotype1970	IGH	IGHM	Hc	IGHV1-22	None	IGHJ3	CARNYDYDWFAYW	ko	38	2.05405	1642	88.7568	448	24.2162
765	clonotype1971	IGH	IGHM	Hc	IGHV8-5	None	IGHJ4	CAQIAYDYDEGYAMDYW	ko	6	0.324324	1642	88.7568	634	34.2703
766	clonotype1972	IGH	IGHM	Hc	IGHV9-3	None	IGHJ3	CARWRGSTMVTGFAYW	ko	89	4.81081	1642	88.7568	448	24.2162
767	clonotype1973	IGH	IGHM	Hc	IGHV9-1	None	IGHJ3	CVRHYDIRQWFAYW	ko	18	0.972973	1642	88.7568	448	24.2162
768	clonotype1974	IGH	IGHM	Hc	IGHV5-6	None	IGHJ3	CARDYDSSYPFAYW	ko	19	1.02703	1642	88.7568	448	24.2162
769	clonotype1975	IGH	IGHM	Hc	IGHV3-6	None	IGHJ2	CARGDSSGYYW	ko	135	7.2973	1642	88.7568	498	26.9189
770	clonotype1976	IGH	IGHM	Hc	IGHV1-64	IGHD1-1	IGHJ3	CARQASYYYGSSFAYW	ko	36	1.94595	150	8.10811	448	24.2162
771	clonotype1980	IGH	IGHM	Hc	IGHV3-6	None	IGHJ3	CARDVYDGSWFAYW	ko	135	7.2973	1642	88.7568	448	24.2162
772	clonotype1982	IGH	IGHM	Hc	IGHV1-26	None	IGHJ2	CARRPYYGNYVLDYW	ko	130	7.02703	1642	88.7568	498	26.9189
773	clonotype1984	IGH	IGHM	Hc	IGHV1-49	None	IGHJ1	CARGDGYHWYFDVW	ko	4	0.216216	1642	88.7568	270	14.5946
774	clonotype1985	IGH	IGHM	Hc	IGHV1-42	None	IGHJ2	CARANYGSSYGYW	ko	15	0.810811	1642	88.7568	498	26.9189
775	clonotype1986	IGH	IGHM	Hc	IGHV8-8	None	IGHJ2	CARIENYSNYEDYFDYW	ko	78	4.21622	1642	88.7568	498	26.9189
776	clonotype1987	IGH	IGHM	Hc	IGHV1-39	IGHD1-1	IGHJ4	CARKGYYYGSSYRYYAMDYW	ko	39	2.10811	150	8.10811	634	34.2703
777	clonotype1988	IGH	IGHM	Hc	IGHV1-19	None	IGHJ2	CATEANDYW	ko	49	2.64865	1642	88.7568	498	26.9189
778	clonotype1990	IGH	IGHM	Hc	IGHV1-66	None	IGHJ4	CANTPPYYDAGEPYAMDYW	ko	6	0.324324	1642	88.7568	634	34.2703
779	clonotype1991	IGH	None	Hc	IGHV6-3	None	IGHJ3	CTGPAIYDGYSGEAWFAYW	ko	82	4.43243	1642	88.7568	448	24.2162
780	clonotype1992	IGH	None	Hc	IGHV5-2	None	IGHJ3	CARHSSGYLYW	ko	4	0.216216	1642	88.7568	448	24.2162
781	clonotype1994	IGH	IGHM	Hc	IGHV1-64	None	IGHJ3	CARSKDGYYVAWFAYW	ko	36	1.94595	1642	88.7568	448	24.2162
782	clonotype1995	IGH	IGHM	Hc	IGHV5-6	IGHD1-1	IGHJ3	CARPYYYGSSYMFAYW	ko	19	1.02703	150	8.10811	448	24.2162
783	clonotype1996	IGH	IGHM	Hc	IGHV1-19	None	IGHJ4	CAPYDSLGYYAMDYW	ko	49	2.64865	1642	88.7568	634	34.2703
784	clonotype1998	IGH	None	Hc	IGHV9-1	None	IGHJ3	CVKGIYYYGSFAYW	ko	18	0.972973	1642	88.7568	448	24.2162
785	clonotype1999	IGH	IGHM	Hc	IGHV1-20	None	IGHJ2	CAREDPITTVGGLDYW	ko	7	0.378378	1642	88.7568	498	26.9189
786	clonotype2001	IGH	IGHM	Hc	IGHV5-4	None	IGHJ2	CARLTVVAYYFDYW	ko	23	1.24324	1642	88.7568	498	26.9189
787	clonotype2004	IGH	IGHM	Hc	IGHV1-59	None	IGHJ4	CARGGYGSSSYYAMDYW	ko	6	0.324324	1642	88.7568	634	34.2703
788	clonotype2005	IGH	IGHD	Hc	IGHV5-4	IGHD1-1	IGHJ2	CARRPYYYGSSYEWVYFDYW	ko	23	1.24324	150	8.10811	498	26.9189
789	clonotype2006	IGH	None	Hc	IGHV1-49	IGHD3-2	IGHJ4	CAVDSSGYGVYAMDYW	ko	4	0.216216	9	0.486486	634	34.2703
790	clonotype2007	IGH	IGHM	Hc	IGHV1-53	None	IGHJ3	CARDYSNYGAWFAYW	ko	29	1.56757	1642	88.7568	448	24.2162
791	clonotype2008	IGH	None	Hc	IGHV1-75	None	IGHJ3	CASQAPYGYDAWFAYW	ko	36	1.94595	1642	88.7568	448	24.2162
792	clonotype2010	IGH	IGHM	Hc	IGHV10-1	None	IGHJ4	CVRLDGYFW	ko	27	1.45946	1642	88.7568	634	34.2703
793	clonotype2011	IGH	IGHM	Hc	IGHV6-3	None	IGHJ1	CTGSNYDWYFDVW	ko	82	4.43243	1642	88.7568	270	14.5946
794	clonotype2012	IGH	IGHM	Hc	IGHV1-81	None	IGHJ3	CARGEGGRGFAYW	ko	39	2.10811	1642	88.7568	448	24.2162
795	clonotype2014	IGH	IGHM	Hc	IGHV1-69	None	IGHJ3	CARLRAYSNYAYW	ko	15	0.810811	1642	88.7568	448	24.2162
796	clonotype2015	IGH	IGHM	Hc	IGHV5-16	None	IGHJ4	CARDSYYGSRRGYAMDYW	ko	29	1.56757	1642	88.7568	634	34.2703
797	clonotype2017	IGH	IGHM	Hc	IGHV3-6	None	IGHJ4	CASSLYYYGDYAMDYW	ko	135	7.2973	1642	88.7568	634	34.2703
798	clonotype2018	IGH	IGHM	Hc	IGHV2-6	None	IGHJ4	CARTGLGNYLFYYAMDYW	ko	12	0.648649	1642	88.7568	634	34.2703
799	clonotype2020	IGH	IGHM	Hc	IGHV2-2	None	IGHJ3	CAREDGNSLFAYW	ko	48	2.59459	1642	88.7568	448	24.2162
800	clonotype2022	IGH	IGHM	Hc	IGHV2-2	None	IGHJ4	CARGYYAMDYW	ko	48	2.59459	1642	88.7568	634	34.2703
801	clonotype2023	IGH	IGHM	Hc	IGHV2-5	None	IGHJ4	CASKLGRAMEYW	ko	16	0.864865	1642	88.7568	634	34.2703
802	clonotype2025	IGH	IGHM	Hc	IGHV5-4	None	IGHJ3	CARAYGNYPAWFAYW	ko	23	1.24324	1642	88.7568	448	24.2162
803	clonotype2026	IGH	IGHM	Hc	IGHV1-82	None	IGHJ2	CARGTAFLSLFDYW	ko	21	1.13514	1642	88.7568	498	26.9189
804	clonotype2029	IGH	IGHM	Hc	IGHV9-3	None	IGHJ3	CAREGASTVVEEAWFAYW	ko	89	4.81081	1642	88.7568	448	24.2162
805	clonotype2032	IGH	IGHM	Hc	IGHV1-47	None	IGHJ2	CARRGDYEGEFDYW	ko	8	0.432432	1642	88.7568	498	26.9189
806	clonotype2033	IGH	IGHM	Hc	IGHV5-9	None	IGHJ4	CARHGYGYDLYLAMDYW	ko	7	0.378378	1642	88.7568	634	34.2703
807	clonotype2035	IGH	IGHM	Hc	IGHV8-12	None	IGHJ1	CARRRDYGYWYFDVW	ko	38	2.05405	1642	88.7568	270	14.5946
808	clonotype2036	IGH	IGHM	Hc	IGHV1-42	IGHD4-1	IGHJ3	CARVLANWDGAYW	ko	15	0.810811	4	0.216216	448	24.2162
809	clonotype2037	IGH	None	Hc	IGHV1-39	None	IGHJ1	CARSRDGSSPYCNVW	ko	39	2.10811	1642	88.7568	270	14.5946
810	clonotype2038	IGH	IGHM	Hc	IGHV1-72	None	IGHJ3	CARDDYDPFAYW	ko	21	1.13514	1642	88.7568	448	24.2162
811	clonotype2040	IGH	IGHM	Hc	IGHV2-2	None	IGHJ2	CARNGGYYVYCFDYW	ko	48	2.59459	1642	88.7568	498	26.9189
812	clonotype2041	IGH	IGHM	Hc	IGHV9-3	None	IGHJ2	CARPYDYDGDYFDYW	ko	89	4.81081	1642	88.7568	498	26.9189
813	clonotype2042	IGH	IGHM	Hc	IGHV6-3	None	IGHJ2	CTGDHYGSIYFDYW	ko	82	4.43243	1642	88.7568	498	26.9189
814	clonotype2043	IGH	IGHM	Hc	IGHV1-72	None	IGHJ4	CAREGAMDYW	ko	21	1.13514	1642	88.7568	634	34.2703
815	clonotype2044	IGH	IGHM	Hc	IGHV10-3	None	IGHJ1	CVRDRRYDYDWGYFDVW	ko	33	1.78378	1642	88.7568	270	14.5946
816	clonotype2045	IGH	IGHM	Hc	IGHV1-15	None	IGHJ2	CTRSDGSSPSYFDYW	ko	15	0.810811	1642	88.7568	498	26.9189
817	clonotype2046	IGH	IGHM	Hc	IGHV5-16	None	IGHJ3	CARGGDDYDGRFAYW	ko	29	1.56757	1642	88.7568	448	24.2162
818	clonotype2047	IGH	IGHM	Hc	IGHV1-62-2	None	IGHJ3	CARHGPTGRFAYW	ko	16	0.864865	1642	88.7568	448	24.2162
819	clonotype2049	IGH	IGHM	Hc	IGHV8-12	None	IGHJ1	CARKGGNYGAYWYFDVW	ko	38	2.05405	1642	88.7568	270	14.5946
820	clonotype2051	IGH	IGHM	Hc	IGHV1-61	None	IGHJ4	CARGGYYGRDYYAMDYW	ko	5	0.27027	1642	88.7568	634	34.2703
821	clonotype2052	IGH	IGHM	Hc	IGHV14-3	None	IGHJ3	CAGVRREFAYW	ko	7	0.378378	1642	88.7568	448	24.2162
822	clonotype2053	IGH	IGHM	Hc	IGHV2-2	None	IGHJ4	CARNSPGAYYYAMDYW	ko	48	2.59459	1642	88.7568	634	34.2703
823	clonotype2054	IGH	IGHM	Hc	IGHV10-1	None	IGHJ4	CVRHDGYHSYYAMDYW	ko	27	1.45946	1642	88.7568	634	34.2703
824	clonotype2055	IGH	IGHM	Hc	IGHV6-3	None	IGHJ2	CTDSCFDYW	ko	82	4.43243	1642	88.7568	498	26.9189
825	clonotype2056	IGH	IGHM	Hc	IGHV1-5	None	IGHJ4	CTRGRLDAMDYW	ko	31	1.67568	1642	88.7568	634	34.2703
826	clonotype2057	IGH	IGHM	Hc	IGHV3-6	None	IGHJ4	CARDSGGNLLYYYAMDYW	ko	135	7.2973	1642	88.7568	634	34.2703
827	clonotype2058	IGH	IGHM	Hc	IGHV1-26	IGHD3-2	IGHJ3	CARSRQLRLRDWFAYW	ko	130	7.02703	9	0.486486	448	24.2162
828	clonotype2059	IGH	IGHM	Hc	IGHV1-64	None	IGHJ3	CARIGQLRLQFAYW	ko	36	1.94595	1642	88.7568	448	24.2162
829	clonotype2060	IGH	IGHM	Hc	IGHV9-3	None	IGHJ2	CANADYYYPYW	ko	89	4.81081	1642	88.7568	498	26.9189
830	clonotype2062	IGH	IGHM	Hc	IGHV1-81	None	IGHJ2	CARFVGGSSLYYFDYW	ko	39	2.10811	1642	88.7568	498	26.9189
831	clonotype2063	IGH	IGHM	Hc	IGHV2-2	None	IGHJ4	CAKDGYYVNYAMDYW	ko	48	2.59459	1642	88.7568	634	34.2703
832	clonotype2064	IGH	IGHM	Hc	IGHV7-3	None	IGHJ3	CARYQDYYGSSPWFAYW	ko	27	1.45946	1642	88.7568	448	24.2162
833	clonotype2065	IGH	IGHM	Hc	IGHV5-9-1	IGHD1-1	IGHJ2	CTRDNYYGSSYGYFDYW	ko	12	0.648649	150	8.10811	498	26.9189
834	clonotype2066	IGH	None	Hc	IGHV1-26	None	IGHJ2	CARGYDYEGGGYFDYW	ko	130	7.02703	1642	88.7568	498	26.9189
835	clonotype2067	IGH	IGHM	Hc	IGHV1-78	None	IGHJ2	CARDAFDYW	ko	26	1.40541	1642	88.7568	498	26.9189
836	clonotype2068	IGH	IGHM	Hc	IGHV1-74	IGHD1-1	IGHJ4	CAILHYYGSSYEAMDYW	ko	13	0.702703	150	8.10811	634	34.2703
837	clonotype2069	IGH	IGHM	Hc	IGHV1-19	None	IGHJ3	CARGYYDYDADWFAYW	ko	49	2.64865	1642	88.7568	448	24.2162
838	clonotype2070	IGH	IGHM	Hc	IGHV1-72	None	IGHJ2	CARYYYGSSLDYW	ko	21	1.13514	1642	88.7568	498	26.9189
839	clonotype2072	IGH	IGHM	Hc	IGHV1-26	None	IGHJ4	CLMDYW	ko	130	7.02703	1642	88.7568	634	34.2703
840	clonotype2073	IGH	IGHM	Hc	IGHV5-16	None	IGHJ4	CARVSFYYGSPYYAMDYW	ko	29	1.56757	1642	88.7568	634	34.2703
841	clonotype2074	IGH	IGHM	Hc	IGHV10-3	None	IGHJ4	CVRDTDYAMDYW	ko	33	1.78378	1642	88.7568	634	34.2703
842	clonotype2075	IGH	IGHM	Hc	IGHV1-26	None	IGHJ2	CASPLYYDYGGYFDYW	ko	130	7.02703	1642	88.7568	498	26.9189
843	clonotype2076	IGH	IGHM	Hc	IGHV1-78	None	IGHJ2	CATLLLRHW	ko	26	1.40541	1642	88.7568	498	26.9189
844	clonotype2077	IGH	IGHM	Hc	IGHV1-26	None	IGHJ4	CARSSLWAMDYW	ko	130	7.02703	1642	88.7568	634	34.2703
845	clonotype2079	IGH	IGHM	Hc	IGHV15-2	IGHD2-4	IGHJ4	CARFLYYDYDGGNW	ko	13	0.702703	18	0.972973	634	34.2703
846	clonotype2081	IGH	IGHM	Hc	IGHV9-3	None	IGHJ1	CARSPLTTVVPYWYFDVW	ko	89	4.81081	1642	88.7568	270	14.5946
847	clonotype2083	IGH	IGHM	Hc	IGHV12-3	IGHD1-1	IGHJ3	CAGDRSHYYGSSFFAYW	ko	1	0.0540541	150	8.10811	448	24.2162
848	clonotype2084	IGH	IGHM	Hc	IGHV9-3	None	IGHJ2	CARRGGNSFDYW	ko	89	4.81081	1642	88.7568	498	26.9189
849	clonotype2086	IGH	IGHM	Hc	IGHV1-69	None	IGHJ4	CARVYSNSRRDAMDYW	ko	15	0.810811	1642	88.7568	634	34.2703
850	clonotype2087	IGH	IGHM	Hc	IGHV1-19	None	IGHJ4	CARKGAQATIYYAMDYW	ko	49	2.64865	1642	88.7568	634	34.2703
851	clonotype2089	IGH	IGHM	Hc	IGHV6-3	None	IGHJ2	CTAPLITIKGDYFDYW	ko	82	4.43243	1642	88.7568	498	26.9189
852	clonotype2090	IGH	IGHM	Hc	IGHV1-71	None	IGHJ4	CARHEARKLYYSNYDAMDYW	ko	11	0.594595	1642	88.7568	634	34.2703
853	clonotype2091	IGH	IGHM	Hc	IGHV1-22	None	IGHJ4	CASGNPYAMDYW	ko	38	2.05405	1642	88.7568	634	34.2703
854	clonotype2092	IGH	IGHM	Hc	IGHV9-2	None	IGHJ2	CARCGSSYVDYW	ko	9	0.486486	1642	88.7568	498	26.9189
855	clonotype2093	IGH	IGHM	Hc	IGHV1-75	IGHD3-2	IGHJ4	CARDSSGYSYAMDYW	ko	36	1.94595	9	0.486486	634	34.2703
856	clonotype2094	IGH	IGHM	Hc	IGHV9-2	None	IGHJ1	CARSWYFDVW	ko	9	0.486486	1642	88.7568	270	14.5946
857	clonotype2095	IGH	IGHM	Hc	IGHV1-18	None	IGHJ4	CARARGYSYAMDYW	ko	47	2.54054	1642	88.7568	634	34.2703
858	clonotype2097	IGH	IGHM	Hc	IGHV3-6	None	IGHJ1	CARRDYYGSSSYFDVW	ko	135	7.2973	1642	88.7568	270	14.5946
859	clonotype2098	IGH	IGHM	Hc	IGHV5-16	IGHD2-4	IGHJ2	CARGNIYYDYDGGVDYW	ko	29	1.56757	18	0.972973	498	26.9189
860	clonotype2099	IGH	IGHM	Hc	IGHV10-3	None	IGHJ2	CVREYYYGSSGFDYW	ko	33	1.78378	1642	88.7568	498	26.9189
861	clonotype2100	IGH	IGHM	Hc	IGHV1-85	IGHD1-1	IGHJ1	CARQIFITTVVARYFDVW	ko	9	0.486486	150	8.10811	270	14.5946
862	clonotype2101	IGH	IGHM	Hc	IGHV1-81	None	IGHJ2	CASGGCITTVVPDYW	ko	39	2.10811	1642	88.7568	498	26.9189
863	clonotype2103	IGH	IGHM	Hc	IGHV3-6	None	IGHJ4	CARKPYRVDVYYAMDYW	ko	135	7.2973	1642	88.7568	634	34.2703
864	clonotype2104	IGH	IGHM	Hc	IGHV1-34	None	IGHJ4	CARRHYDYDDPFMDYW	ko	5	0.27027	1642	88.7568	634	34.2703
865	clonotype2105	IGH	IGHM	Hc	IGHV14-4	None	IGHJ4	CTLLRAMDYW	ko	24	1.2973	1642	88.7568	634	34.2703
866	clonotype2106	IGH	IGHM	Hc	IGHV1-69	None	IGHJ2	CAKGPGPRDYW	ko	15	0.810811	1642	88.7568	498	26.9189
867	clonotype2107	IGH	IGHM	Hc	IGHV1-64	None	IGHJ4	CARDYYGSSSGYYAMDYW	ko	36	1.94595	1642	88.7568	634	34.2703
868	clonotype2109	IGH	IGHM	Hc	IGHV3-6	None	IGHJ4	CAIYYGYDYYAMDYW	ko	135	7.2973	1642	88.7568	634	34.2703
869	clonotype2112	IGH	IGHM	Hc	IGHV1-26	None	IGHJ1	CARKFYDYEYWYFDVW	ko	130	7.02703	1642	88.7568	270	14.5946
870	clonotype2113	IGH	IGHM	Hc	IGHV1-39	None	IGHJ1	CARITTVPYWYFDVW	ko	39	2.10811	1642	88.7568	270	14.5946
871	clonotype2114	IGH	IGHM	Hc	IGHV1-39	IGHD1-1	IGHJ4	CARSGYYGSSYCYYAMDYW	ko	39	2.10811	150	8.10811	634	34.2703
872	clonotype2116	IGH	IGHM	Hc	IGHV1-54	None	IGHJ2	CARSTTVVAKGFDYW	ko	15	0.810811	1642	88.7568	498	26.9189
873	clonotype2118	IGH	IGHM	Hc	IGHV9-3	None	IGHJ3	CARVDYYGSSFAYW	ko	89	4.81081	1642	88.7568	448	24.2162
874	clonotype2119	IGH	None	Hc	IGHV1-74	None	IGHJ2	CAISHYYGSRDFDYW	ko	13	0.702703	1642	88.7568	498	26.9189
875	clonotype2120	IGH	IGHM	Hc	IGHV9-3	IGHD1-1	IGHJ2	CAKIYYYGSSPFDYW	ko	89	4.81081	150	8.10811	498	26.9189
876	clonotype2121	IGH	IGHM	Hc	IGHV1-19	None	IGHJ2	CASDSSGYADYW	ko	49	2.64865	1642	88.7568	498	26.9189
877	clonotype2122	IGH	IGHM	Hc	IGHV9-2	None	IGHJ4	CARGYYGNSWALVDYW	ko	9	0.486486	1642	88.7568	634	34.2703
878	clonotype2124	IGH	IGHM	Hc	IGHV1-78	None	IGHJ3	CARALYWWFAYW	ko	26	1.40541	1642	88.7568	448	24.2162
879	clonotype2125	IGH	IGHM	Hc	IGHV1-78	None	IGHJ4	CARDYGSSYYAMDYW	ko	26	1.40541	1642	88.7568	634	34.2703
880	clonotype2126	IGH	IGHM	Hc	IGHV6-3	None	IGHJ3	CTGGNWDSYW	ko	82	4.43243	1642	88.7568	448	24.2162
881	clonotype2127	IGH	None	Hc	IGHV1-19	IGHD2-4	IGHJ1	CARYGGIIYYDYDVWYFDVW	ko	49	2.64865	18	0.972973	270	14.5946
882	clonotype2128	IGH	None	Hc	IGHV1-49	None	IGHJ3	CAIGSSYGWFAYW	ko	4	0.216216	1642	88.7568	448	24.2162
883	clonotype2129	IGH	IGHM	Hc	IGHV4-1	None	IGHJ3	CAGTTVVGPGFAYW	ko	41	2.21622	1642	88.7568	448	24.2162
884	clonotype2131	IGH	IGHM	Hc	IGHV1-26	None	IGHJ3	CARVGGYSNYETLFAYW	ko	130	7.02703	1642	88.7568	448	24.2162
885	clonotype2132	IGH	None	Hc	IGHV1-9	None	IGHJ2	CAYYGGDYFDYW	ko	27	1.45946	1642	88.7568	498	26.9189
886	clonotype2133	IGH	IGHM	Hc	IGHV6-6	None	IGHJ2	CTRRGNYEDFDYW	ko	25	1.35135	1642	88.7568	498	26.9189
887	clonotype2134	IGH	IGHM	Hc	IGHV1-18	None	IGHJ3	CARGGSYDYDGCFWFAYW	ko	47	2.54054	1642	88.7568	448	24.2162
888	clonotype2136	IGH	IGHM	Hc	IGHV1-78	None	IGHJ3	CARDDGYYVRAYW	ko	26	1.40541	1642	88.7568	448	24.2162
889	clonotype2137	IGH	IGHM	Hc	IGHV1-26	None	IGHJ2	CARSKYYGSSPTGYW	ko	130	7.02703	1642	88.7568	498	26.9189
890	clonotype2139	IGH	None	Hc	IGHV1-20	None	IGHJ3	CARCDYDGPLFAYW	ko	7	0.378378	1642	88.7568	448	24.2162
891	clonotype2140	IGH	IGHM	Hc	IGHV3-1	IGHD4-1	IGHJ3	CARANWDGTPFAYW	ko	21	1.13514	4	0.216216	448	24.2162
892	clonotype2141	IGH	IGHM	Hc	IGHV1-58	None	IGHJ3	CARLGRAFPYW	ko	15	0.810811	1642	88.7568	448	24.2162
893	clonotype2142	IGH	IGHM	Hc	IGHV1-5	IGHD1-1	IGHJ4	CTRSDYYGSSYVGAMDYW	ko	31	1.67568	150	8.10811	634	34.2703
894	clonotype2143	IGH	IGHM	Hc	IGHV2-2	IGHD1-1	IGHJ4	CARNWDYYGSSYDYYAMDYW	ko	48	2.59459	150	8.10811	634	34.2703
895	clonotype2144	IGH	IGHM	Hc	IGHV1-64	None	IGHJ3	CARSGLRQFAYW	ko	36	1.94595	1642	88.7568	448	24.2162
896	clonotype2145	IGH	IGHM	Hc	IGHV1-26	None	IGHJ2	CARLGYW	ko	130	7.02703	1642	88.7568	498	26.9189
897	clonotype2146	IGH	IGHM	Hc	IGHV2-6	IGHD2-4	IGHJ4	CARQAIYYDYDEGWAMDYW	ko	12	0.648649	18	0.972973	634	34.2703
898	clonotype2147	IGH	IGHM	Hc	IGHV2-6-8	None	IGHJ4	CARNSGYAMDYW	ko	1	0.0540541	1642	88.7568	634	34.2703
899	clonotype2148	IGH	IGHM	Hc	IGHV1-64	None	IGHJ1	CARVDYYGSSHWYFDVW	ko	36	1.94595	1642	88.7568	270	14.5946
900	clonotype2149	IGH	IGHM	Hc	IGHV1-26	IGHD1-1	IGHJ2	CTTYITTVVAPFDYW	ko	130	7.02703	150	8.10811	498	26.9189
901	clonotype2150	IGH	None	Hc	IGHV10-1	None	IGHJ3	CVRERTGTFTFAYW	ko	27	1.45946	1642	88.7568	448	24.2162
902	clonotype2151	IGH	None	Hc	IGHV1-26	None	IGHJ4	CARYYYDYDEETLYAMDYW	ko	130	7.02703	1642	88.7568	634	34.2703
903	clonotype2152	IGH	IGHM	Hc	IGHV1-26	IGHD1-1	IGHJ4	CARSIYYYGSSYVRAMDYW	ko	130	7.02703	150	8.10811	634	34.2703
904	clonotype2153	IGH	IGHM	Hc	IGHV1-18	None	IGHJ3	CARSGLTWFAYW	ko	47	2.54054	1642	88.7568	448	24.2162
905	clonotype2154	IGH	IGHM	Hc	IGHV9-3	None	IGHJ3	CARCHYTGFAYW	ko	89	4.81081	1642	88.7568	448	24.2162
906	clonotype2155	IGH	None	Hc	IGHV1-26	None	IGHJ1	CTTLLRWYFDVW	ko	130	7.02703	1642	88.7568	270	14.5946
907	clonotype2160	IGH	IGHM	Hc	IGHV14-4	None	IGHJ3	CTTQGNPWFAYW	ko	24	1.2973	1642	88.7568	448	24.2162
908	clonotype2161	IGH	IGHM	Hc	IGHV14-4	IGHD2-4	IGHJ4	CTFSTMITTRRYYAMDYW	ko	24	1.2973	18	0.972973	634	34.2703
909	clonotype2162	IGH	IGHM	Hc	IGHV1-15	None	IGHJ2	CTRMRLLYYFDYW	ko	15	0.810811	1642	88.7568	498	26.9189
910	clonotype2163	IGH	IGHM	Hc	IGHV1-26	None	IGHJ1	CARLTGTSFTYFDVW	ko	130	7.02703	1642	88.7568	270	14.5946
911	clonotype2165	IGH	IGHM	Hc	IGHV5-12	None	IGHJ4	CARPQLGRTFMDYW	ko	10	0.540541	1642	88.7568	634	34.2703
912	clonotype2166	IGH	IGHM	Hc	IGHV9-3	None	IGHJ3	CARFCDYAWFAYW	ko	89	4.81081	1642	88.7568	448	24.2162
913	clonotype2167	IGH	IGHM	Hc	IGHV1-5	None	IGHJ4	CTNSFTTVVARYW	ko	31	1.67568	1642	88.7568	634	34.2703
914	clonotype2168	IGH	IGHM	Hc	IGHV1-84	None	IGHJ2	CARGDTSPFDYW	ko	10	0.540541	1642	88.7568	498	26.9189
915	clonotype2169	IGH	IGHM	Hc	IGHV1-18	None	IGHJ2	CARGGGIYYYGWDYW	ko	47	2.54054	1642	88.7568	498	26.9189
916	clonotype2171	IGH	IGHM	Hc	IGHV4-1	None	IGHJ2	CASSNPVYFDYW	ko	41	2.21622	1642	88.7568	498	26.9189
917	clonotype2172	IGH	IGHM	Hc	IGHV9-3	None	IGHJ4	CARTTVVAKGGLYAMDYW	ko	89	4.81081	1642	88.7568	634	34.2703
918	clonotype2173	IGH	IGHM	Hc	IGHV8-8	None	IGHJ2	CARMRYYGSSPYFDYW	ko	78	4.21622	1642	88.7568	498	26.9189
919	clonotype2174	IGH	IGHM	Hc	IGHV1-18	None	IGHJ2	CAREDYEGFKVYFDYW	ko	47	2.54054	1642	88.7568	498	26.9189
920	clonotype2175	IGH	IGHM	Hc	IGHV9-3	None	IGHJ3	CARLASLFAYW	ko	89	4.81081	1642	88.7568	448	24.2162
921	clonotype2176	IGH	IGHM	Hc	IGHV1-9	None	IGHJ2	CASITTGYFDYW	ko	27	1.45946	1642	88.7568	498	26.9189
922	clonotype2179	IGH	IGHM	Hc	IGHV1-50	None	IGHJ4	CARSGVITTAMDYW	ko	10	0.540541	1642	88.7568	634	34.2703
923	clonotype2181	IGH	IGHM	Hc	IGHV1-26	None	IGHJ4	CAREGYYGGYYAMDYW	ko	130	7.02703	1642	88.7568	634	34.2703
924	clonotype2182	IGH	IGHM	Hc	IGHV8-12	None	IGHJ4	CARKLDVYYGNFYYAMDYW	ko	38	2.05405	1642	88.7568	634	34.2703
925	clonotype2183	IGH	IGHM	Hc	IGHV9-3	IGHD1-1	IGHJ1	CARNYYYGSSRDWYFDVW	ko	89	4.81081	150	8.10811	270	14.5946
926	clonotype2184	IGH	IGHM	Hc	IGHV1-26	None	IGHJ1	CAREDYGSSHWYFDVW	ko	130	7.02703	1642	88.7568	270	14.5946
927	clonotype2185	IGH	IGHM	Hc	IGHV7-3	None	IGHJ3	CARSSTEDWFAYW	ko	27	1.45946	1642	88.7568	448	24.2162
928	clonotype2186	IGH	IGHM	Hc	IGHV1-80	None	IGHJ4	CARRILGYPIAMDYW	ko	14	0.756757	1642	88.7568	634	34.2703
929	clonotype2187	IGH	IGHM	Hc	IGHV1-52	None	IGHJ3	CAREGWFAYW	ko	6	0.324324	1642	88.7568	448	24.2162
930	clonotype2189	IGH	IGHM	Hc	IGHV1-63	None	IGHJ4	CARRAYDGYLLYAMDYW	ko	7	0.378378	1642	88.7568	634	34.2703
931	clonotype2190	IGH	IGHM	Hc	IGHV1-72	None	IGHJ2	CARIYDSLDYW	ko	21	1.13514	1642	88.7568	498	26.9189
932	clonotype2192	IGH	IGHM	Hc	IGHV10-3	None	IGHJ4	CVRERDDPYYYAMDYW	ko	33	1.78378	1642	88.7568	634	34.2703
933	clonotype2193	IGH	IGHM	Hc	IGHV1-36	IGHD1-1	IGHJ3	CALLGITTVVATAPSYW	ko	8	0.432432	150	8.10811	448	24.2162
934	clonotype2194	IGH	IGHM	Hc	IGHV1-18	None	IGHJ2	CARYDGYYGYW	ko	47	2.54054	1642	88.7568	498	26.9189
935	clonotype2195	IGH	None	Hc	IGHV7-1	None	IGHJ1	CARDGYDYDDWYFDVW	ko	22	1.18919	1642	88.7568	270	14.5946
936	clonotype2196	IGH	IGHM	Hc	IGHV1-81	None	IGHJ3	CAREWGGYWFAYW	ko	39	2.10811	1642	88.7568	448	24.2162
937	clonotype2197	IGH	IGHM	Hc	IGHV1-22	None	IGHJ2	CARRFYYGSSPYYFDYW	ko	38	2.05405	1642	88.7568	498	26.9189
938	clonotype2198	IGH	IGHM	Hc	IGHV1-26	None	IGHJ4	CARWRLRRTPYYAMDYW	ko	130	7.02703	1642	88.7568	634	34.2703
939	clonotype2199	IGH	IGHM	Hc	IGHV6-3	IGHD1-1	IGHJ2	CTGDAFITTVVGYFDYW	ko	82	4.43243	150	8.10811	498	26.9189
940	clonotype2200	IGH	IGHM	Hc	IGHV1-54	None	IGHJ3	CARGGFAYW	ko	15	0.810811	1642	88.7568	448	24.2162
941	clonotype2201	IGH	IGHM	Hc	IGHV9-3	None	IGHJ4	CANFAMDYW	ko	89	4.81081	1642	88.7568	634	34.2703
942	clonotype2202	IGH	IGHM	Hc	IGHV8-12	None	IGHJ2	CARRIDGYEGYFDYW	ko	38	2.05405	1642	88.7568	498	26.9189
943	clonotype2205	IGH	None	Hc	IGHV1-26	None	IGHJ4	CARFTTVVARYAMDYG	ko	130	7.02703	1642	88.7568	634	34.2703
944	clonotype2206	IGH	IGHM	Hc	IGHV2-2	None	IGHJ4	CARNPFYGYDEVHAMDYW	ko	48	2.59459	1642	88.7568	634	34.2703
945	clonotype2208	IGH	IGHM	Hc	IGHV3-6	None	IGHJ2	CARGVTTVALDYW	ko	135	7.2973	1642	88.7568	498	26.9189
946	clonotype2209	IGH	IGHM	Hc	IGHV9-3	None	IGHJ4	CARGAYGYDAMDYW	ko	89	4.81081	1642	88.7568	634	34.2703
947	clonotype2210	IGH	IGHM	Hc	IGHV9-3	IGHD2-4	IGHJ2	CARGIYYDYDDGPPFDYW	ko	89	4.81081	18	0.972973	498	26.9189
948	clonotype2211	IGH	IGHM	Hc	IGHV1-18	None	IGHJ1	CARTKDYGYYSNYEGYFDVW	ko	47	2.54054	1642	88.7568	270	14.5946
949	clonotype2212	IGH	IGHM	Hc	IGHV6-6	None	IGHJ4	CTRRDGYYGLDYW	ko	25	1.35135	1642	88.7568	634	34.2703
950	clonotype2213	IGH	IGHM	Hc	IGHV1-26	IGHD2-7	IGHJ3	CASPLSTMVTTFFAYW	ko	130	7.02703	3	0.162162	448	24.2162
951	clonotype2214	IGH	IGHM	Hc	IGHV10-3	None	IGHJ2	CVRGEDGNYEDFDYW	ko	33	1.78378	1642	88.7568	498	26.9189
952	clonotype2215	IGH	IGHM	Hc	IGHV8-8	None	IGHJ4	CARIGHGSSRDYAMDYW	ko	78	4.21622	1642	88.7568	634	34.2703
953	clonotype2216	IGH	IGHM	Hc	IGHV8-8	IGHD1-1	IGHJ2	CARMGWNAQFQIYYYGSSYHYFDYW	ko	78	4.21622	150	8.10811	498	26.9189
954	clonotype2217	IGH	IGHM	Hc	IGHV1-18	None	IGHJ4	CARPYYGSSYDYAMDYW	ko	47	2.54054	1642	88.7568	634	34.2703
955	clonotype2218	IGH	IGHM	Hc	IGHV1-26	None	IGHJ2	CARGGDLLPDYW	ko	130	7.02703	1642	88.7568	498	26.9189
956	clonotype2219	IGH	None	Hc	IGHV1-71	None	IGHJ3	CARHEDYYGSSPFAYW	ko	11	0.594595	1642	88.7568	448	24.2162
957	clonotype2220	IGH	IGHM	Hc	IGHV9-3	IGHD1-1	IGHJ2	CARARGFITTVVADYW	ko	89	4.81081	150	8.10811	498	26.9189
958	clonotype2221	IGH	IGHM	Hc	IGHV9-3	None	IGHJ1	CARSCGSSYWYFDVW	ko	89	4.81081	1642	88.7568	270	14.5946
959	clonotype2222	IGH	IGHM	Hc	IGHV3-6	None	IGHJ1	CARGDYGSSSETYWYFDVW	ko	135	7.2973	1642	88.7568	270	14.5946
960	clonotype2223	IGH	IGHM	Hc	IGHV14-2	None	IGHJ2	CASEEGIYYGNSLDYW	ko	14	0.756757	1642	88.7568	498	26.9189
961	clonotype2224	IGH	IGHM	Hc	IGHV3-6	None	IGHJ3	CARSYGNGYW	ko	135	7.2973	1642	88.7568	448	24.2162
962	clonotype2225	IGH	IGHM	Hc	IGHV2-9-1	None	IGHJ1	CARLFDVW	ko	21	1.13514	1642	88.7568	270	14.5946
963	clonotype2226	IGH	None	Hc	IGHV14-1	None	IGHJ3	CTTYDGYYGFAYW	ko	3	0.162162	1642	88.7568	448	24.2162
964	clonotype2227	IGH	IGHM	Hc	IGHV1-80	IGHD3-2	IGHJ2	CARDKTAQATLYYFDYW	ko	14	0.756757	9	0.486486	498	26.9189
965	clonotype2228	IGH	IGHM	Hc	IGHV1-72	None	IGHJ1	CARNVDYGWYFDVW	ko	21	1.13514	1642	88.7568	270	14.5946
966	clonotype2229	IGH	IGHM	Hc	IGHV6-3	None	IGHJ1	CTGSSYWYFDVW	ko	82	4.43243	1642	88.7568	270	14.5946
967	clonotype2231	IGH	IGHM	Hc	IGHV8-12	None	IGHJ3	CARRGYYSNYLFAYW	ko	38	2.05405	1642	88.7568	448	24.2162
968	clonotype2232	IGH	None	Hc	IGHV1-80	None	IGHJ1	CARWGGRYFDVW	ko	14	0.756757	1642	88.7568	270	14.5946
969	clonotype2233	IGH	IGHM	Hc	IGHV1-85	None	IGHJ1	CANGSSYWYFDVW	ko	9	0.486486	1642	88.7568	270	14.5946
970	clonotype2238	IGH	IGHM	Hc	IGHV1-78	IGHD1-1	IGHJ2	CAIGHPVTTVVATRW	ko	26	1.40541	150	8.10811	498	26.9189
971	clonotype2240	IGH	IGHM	Hc	IGHV1-85	None	IGHJ2	CARSCPLYYGSSFFDYW	ko	9	0.486486	1642	88.7568	498	26.9189
972	clonotype2241	IGH	IGHM	Hc	IGHV4-1	None	IGHJ2	CAAYGSSYGYFDYW	ko	41	2.21622	1642	88.7568	498	26.9189
973	clonotype2243	IGH	None	Hc	IGHV1-26	None	IGHJ3	CAETNQAHGGFAYW	ko	130	7.02703	1642	88.7568	448	24.2162
974	clonotype2244	IGH	IGHM	Hc	IGHV1-82	None	IGHJ3	CARGSNW	ko	21	1.13514	1642	88.7568	448	24.2162
975	clonotype2245	IGH	IGHM	Hc	IGHV1-75	None	IGHJ2	CASEGVTTVVESFDYW	ko	36	1.94595	1642	88.7568	498	26.9189
976	clonotype2246	IGH	IGHM	Hc	IGHV9-3	None	IGHJ2	CARPYGYDGRNYFDYW	ko	89	4.81081	1642	88.7568	498	26.9189
977	clonotype2247	IGH	IGHM	Hc	IGHV1-18	None	IGHJ4	CARSFTTVVGGAMDYW	ko	47	2.54054	1642	88.7568	634	34.2703
978	clonotype2248	IGH	IGHM	Hc	IGHV5-17	None	IGHJ1	CGRQLAYYSNRYFDVW	ko	17	0.918919	1642	88.7568	270	14.5946
979	clonotype2250	IGH	IGHM	Hc	IGHV2-2	None	IGHJ2	CARSLIYYDLYYFDYW	ko	48	2.59459	1642	88.7568	498	26.9189
980	clonotype2251	IGH	IGHM	Hc	IGHV1-19	None	IGHJ2	CARDYGYYFDYW	ko	49	2.64865	1642	88.7568	498	26.9189
981	clonotype2252	IGH	IGHM	Hc	IGHV5-9-1	None	IGHJ3	CTREITTGVGFAYW	ko	12	0.648649	1642	88.7568	448	24.2162
982	clonotype2253	IGH	IGHM	Hc	IGHV1-43	None	IGHJ4	CARDGSYALDYW	ko	1	0.0540541	1642	88.7568	634	34.2703
983	clonotype2254	IGH	IGHM	Hc	IGHV1-5	None	IGHJ3	CTRYRIDYYGTPWFAYW	ko	31	1.67568	1642	88.7568	448	24.2162
984	clonotype2255	IGH	IGHM	Hc	IGHV2-5	None	IGHJ4	CASYYYGSRPYYYAMDYW	ko	16	0.864865	1642	88.7568	634	34.2703
985	clonotype2256	IGH	IGHM	Hc	IGHV6-3	None	IGHJ4	CTGWLGYAMDYW	ko	82	4.43243	1642	88.7568	634	34.2703
986	clonotype2257	IGH	IGHD	Hc	IGHV6-3	None	IGHJ3	CTDGYPFAYW	ko	82	4.43243	1642	88.7568	448	24.2162
987	clonotype2258	IGH	IGHM	Hc	IGHV5-4	None	IGHJ4	CAREGDDYDGVLYAMDYW	ko	23	1.24324	1642	88.7568	634	34.2703
988	clonotype2259	IGH	IGHM	Hc	IGHV1-53	None	IGHJ1	CARSDHSYWYFDVW	ko	29	1.56757	1642	88.7568	270	14.5946
989	clonotype2260	IGH	IGHM	Hc	IGHV3-6	None	IGHJ2	CASYDGYYGDYW	ko	135	7.2973	1642	88.7568	498	26.9189
990	clonotype2262	IGH	IGHM	Hc	IGHV1-5	None	IGHJ3	CTRDYYGSAWFAYW	ko	31	1.67568	1642	88.7568	448	24.2162
991	clonotype2263	IGH	IGHM	Hc	IGHV1-53	IGHD2-4	IGHJ4	CAREGIYYDYDGWGMDYW	ko	29	1.56757	18	0.972973	634	34.2703
992	clonotype2264	IGH	IGHM	Hc	IGHV6-3	None	IGHJ1	CTGGVGRGYFDVW	ko	82	4.43243	1642	88.7568	270	14.5946
993	clonotype2265	IGH	IGHM	Hc	IGHV1-26	None	IGHJ4	CAREGATTAMDYW	ko	130	7.02703	1642	88.7568	634	34.2703
994	clonotype2266	IGH	None	Hc	IGHV7-1	None	IGHJ4	CARDAYYDYYAMDYW	ko	22	1.18919	1642	88.7568	634	34.2703
995	clonotype2268	IGH	None	Hc	IGHV5-17	None	IGHJ3	CARSYGSRSPWFAYW	ko	17	0.918919	1642	88.7568	448	24.2162
996	clonotype2269	IGH	IGHM	Hc	IGHV1-5	None	IGHJ4	CTPFYAMDYW	ko	31	1.67568	1642	88.7568	634	34.2703
997	clonotype2270	IGH	IGHM	Hc	IGHV1-39	None	IGHJ3	CARGGYYEAWFAYW	ko	39	2.10811	1642	88.7568	448	24.2162
998	clonotype2271	IGH	IGHM	Hc	IGHV1-63	None	IGHJ1	CARGGFITTGYWYFDVW	ko	7	0.378378	1642	88.7568	270	14.5946
999	clonotype2272	IGH	IGHM	Hc	IGHV1-72	None	IGHJ2	CARSGRTVVATPFDYW	ko	21	1.13514	1642	88.7568	498	26.9189
1000	clonotype2274	IGH	IGHM	Hc	IGHV14-3	None	IGHJ2	CARYDYDGGFDYW	ko	7	0.378378	1642	88.7568	498	26.9189
1001	clonotype2275	IGH	IGHM	Hc	IGHV1-18	None	IGHJ3	CAREDYYGSIPFAYW	ko	47	2.54054	1642	88.7568	448	24.2162
1002	clonotype2276	IGH	IGHM	Hc	IGHV3-6	None	IGHJ3	CARDYDDGAWFAYW	ko	135	7.2973	1642	88.7568	448	24.2162
1003	clonotype2277	IGH	IGHM	Hc	IGHV8-8	IGHD1-1	IGHJ4	CARSYCYGSSYEGAMDYW	ko	78	4.21622	150	8.10811	634	34.2703
1004	clonotype2278	IGH	IGHM	Hc	IGHV3-6	None	IGHJ4	CAREVPRYYDYAMDYW	ko	135	7.2973	1642	88.7568	634	34.2703
1005	clonotype2279	IGH	IGHM	Hc	IGHV1-12	None	IGHJ4	CARSNGNYPYYAMDYW	ko	12	0.648649	1642	88.7568	634	34.2703
1006	clonotype2280	IGH	IGHM	Hc	IGHV1-19	None	IGHJ4	CAREGVYDYDRDYYAMDYW	ko	49	2.64865	1642	88.7568	634	34.2703
1007	clonotype2281	IGH	IGHM	Hc	IGHV8-8	None	IGHJ1	CARIRGITTVVDWYFDVW	ko	78	4.21622	1642	88.7568	270	14.5946
1008	clonotype2283	IGH	IGHM	Hc	IGHV3-6	None	IGHJ2	CAREGYDGYYLFFDYW	ko	135	7.2973	1642	88.7568	498	26.9189
1009	clonotype2284	IGH	IGHM	Hc	IGHV1-52	IGHD2-5	IGHJ3	CARAYYSNYGFAYW	ko	6	0.324324	12	0.648649	448	24.2162
1010	clonotype2285	IGH	IGHM	Hc	IGHV1-59	None	IGHJ3	CARSGGLLRRFAYW	ko	6	0.324324	1642	88.7568	448	24.2162
1011	clonotype2286	IGH	None	Hc	IGHV10-3	None	IGHJ3	CVRVGDLRGTFFGYW	ko	33	1.78378	1642	88.7568	448	24.2162
1012	clonotype2287	IGH	IGHM	Hc	IGHV6-6	None	IGHJ2	CTRRLLDYW	ko	25	1.35135	1642	88.7568	498	26.9189
1013	clonotype2288	IGH	IGHM	Hc	IGHV8-5	None	IGHJ3	CAQMEDGYPAWFAYW	ko	6	0.324324	1642	88.7568	448	24.2162
1014	clonotype2289	IGH	IGHM	Hc	IGHV2-2	None	IGHJ3	CASPYDYAWFAYW	ko	48	2.59459	1642	88.7568	448	24.2162
1015	clonotype2290	IGH	IGHM	Hc	IGHV4-1	None	IGHJ4	CARLSYDYDVGYYAMDYW	ko	41	2.21622	1642	88.7568	634	34.2703
1016	clonotype2291	IGH	IGHM	Hc	IGHV3-6	None	IGHJ1	CARFTTVDVW	ko	135	7.2973	1642	88.7568	270	14.5946
1017	clonotype2292	IGH	IGHM	Hc	IGHV1-42	None	IGHJ4	CARKGGDYW	ko	15	0.810811	1642	88.7568	634	34.2703
1018	clonotype2293	IGH	IGHM	Hc	IGHV1-75	None	IGHJ4	CARVGRYSNLYAMDYW	ko	36	1.94595	1642	88.7568	634	34.2703
1019	clonotype2294	IGH	IGHM	Hc	IGHV6-3	None	IGHJ4	CTGVEVTTGLTGTKKGAMDYW	ko	82	4.43243	1642	88.7568	634	34.2703
1020	clonotype2296	IGH	None	Hc	IGHV5-17	None	IGHJ3	CAREEVLLRFWFAYW	ko	17	0.918919	1642	88.7568	448	24.2162
1021	clonotype2297	IGH	IGHM	Hc	IGHV9-3	None	IGHJ1	CSLYDEDWYFDVW	ko	89	4.81081	1642	88.7568	270	14.5946
1022	clonotype2298	IGH	IGHM	Hc	IGHV1-5	None	IGHJ4	CTGLKSDYYAMDYW	ko	31	1.67568	1642	88.7568	634	34.2703
1023	clonotype2299	IGH	None	Hc	IGHV1-39	None	IGHJ3	CEEVWYGSSYGWWFAYW	ko	39	2.10811	1642	88.7568	448	24.2162
1024	clonotype2300	IGH	IGHM	Hc	IGHV1-80	None	IGHJ2	CAREGLGRDW	ko	14	0.756757	1642	88.7568	498	26.9189
1025	clonotype2301	IGH	IGHM	Hc	IGHV7-1	IGHD4-1	IGHJ4	CAREANWDYAMDYW	ko	22	1.18919	4	0.216216	634	34.2703
1026	clonotype2303	IGH	IGHM	Hc	IGHV1-26	None	IGHJ3	CAREGYDGYPAWFAYW	ko	130	7.02703	1642	88.7568	448	24.2162
1027	clonotype2304	IGH	IGHM	Hc	IGHV9-4	None	IGHJ1	CARYYYGSDWYFDVW	ko	17	0.918919	1642	88.7568	270	14.5946
1028	clonotype2306	IGH	None	Hc	IGHV8-12	None	IGHJ3	CARNYGSFAYW	ko	38	2.05405	1642	88.7568	448	24.2162
1029	clonotype2307	IGH	None	Hc	IGHV1-19	None	IGHJ3	CARGPYYDYDHSFAYW	ko	49	2.64865	1642	88.7568	448	24.2162
1030	clonotype2308	IGH	IGHM	Hc	IGHV9-4	None	IGHJ2	CAIPYYDYDEDFFDYW	ko	17	0.918919	1642	88.7568	498	26.9189
1031	clonotype2309	IGH	IGHM	Hc	IGHV9-3	IGHD1-1	IGHJ4	CAKGKFITTVVATDYYAMDYW	ko	89	4.81081	150	8.10811	634	34.2703
1032	clonotype2310	IGH	IGHM	Hc	IGHV7-3	None	IGHJ2	CARSWDYDLDYW	ko	27	1.45946	1642	88.7568	498	26.9189
1033	clonotype2311	IGH	IGHM	Hc	IGHV10-3	None	IGHJ3	CVRVRDYDYDGFAYW	ko	33	1.78378	1642	88.7568	448	24.2162
1034	clonotype2312	IGH	IGHM	Hc	IGHV1-54	None	IGHJ4	CARKILGAMDYW	ko	15	0.810811	1642	88.7568	634	34.2703
1035	clonotype2315	IGH	IGHM	Hc	IGHV1-26	None	IGHJ3	CARREWGGAWFAYW	ko	130	7.02703	1642	88.7568	448	24.2162
1036	clonotype2316	IGH	IGHM	Hc	IGHV3-1	None	IGHJ3	CARDRWDYDLAYW	ko	21	1.13514	1642	88.7568	448	24.2162
1037	clonotype2321	IGH	IGHM	Hc	IGHV8-8	IGHD1-1	IGHJ1	CARSLITTVVARYFDVW	ko	78	4.21622	150	8.10811	270	14.5946
1038	clonotype2322	IGH	IGHM	Hc	IGHV1-81	None	IGHJ2	CARLGIDYW	ko	39	2.10811	1642	88.7568	498	26.9189
1039	clonotype2323	IGH	IGHM	Hc	IGHV1-11	None	IGHJ1	CATGYWYFDVW	ko	1	0.0540541	1642	88.7568	270	14.5946
1040	clonotype2324	IGH	IGHM	Hc	IGHV7-3	None	IGHJ4	CARYVISYYYAMDYW	ko	27	1.45946	1642	88.7568	634	34.2703
1041	clonotype2327	IGH	IGHM	Hc	IGHV3-6	None	IGHJ1	CARARYGYDGYWYFDVW	ko	135	7.2973	1642	88.7568	270	14.5946
1042	clonotype2328	IGH	IGHM	Hc	IGHV1-71	None	IGHJ3	CARHEEASRTAQATFAYW	ko	11	0.594595	1642	88.7568	448	24.2162
1043	clonotype2329	IGH	IGHM	Hc	IGHV9-3	None	IGHJ3	CASRDYSNYPYW	ko	89	4.81081	1642	88.7568	448	24.2162
1044	clonotype2330	IGH	IGHM	Hc	IGHV1-26	None	IGHJ2	CARSGDYDEFPHYFDYW	ko	130	7.02703	1642	88.7568	498	26.9189
1045	clonotype2331	IGH	IGHM	Hc	IGHV2-9-1	None	IGHJ2	CARFSYGSSLDYW	ko	21	1.13514	1642	88.7568	498	26.9189
1046	clonotype2332	IGH	IGHM	Hc	IGHV1-5	None	IGHJ2	CTNGIYYDYDYW	ko	31	1.67568	1642	88.7568	498	26.9189
1047	clonotype2334	IGH	IGHM	Hc	IGHV6-3	None	IGHJ1	CTKITTVELRYFDVW	ko	82	4.43243	1642	88.7568	270	14.5946
1048	clonotype2335	IGH	IGHM	Hc	IGHV1-18	None	IGHJ4	CARYYYGFYAMDYW	ko	47	2.54054	1642	88.7568	634	34.2703
1049	clonotype2336	IGH	IGHM	Hc	IGHV6-6	None	IGHJ2	CTRHYGNYRESWFDYW	ko	25	1.35135	1642	88.7568	498	26.9189
1050	clonotype2337	IGH	IGHM	Hc	IGHV1-19	None	IGHJ3	CARCIYDGYSWFAYW	ko	49	2.64865	1642	88.7568	448	24.2162
1051	clonotype233	IGH	IGHM	Hc	IGHV3-6	None	IGHJ2	CAREEPPRAGDGNLNYW	ko	135	7.2973	1642	88.7568	498	26.9189
1052	clonotype2340	IGH	IGHM	Hc	IGHV2-3	None	IGHJ4	CAKNYDYFYYAMDYW	ko	16	0.864865	1642	88.7568	634	34.2703
1053	clonotype2341	IGH	None	Hc	IGHV14-2	None	IGHJ1	CAIGLYYGSSYGYFDVW	ko	14	0.756757	1642	88.7568	270	14.5946
1054	clonotype2343	IGH	IGHM	Hc	IGHV1-84	None	IGHJ4	CARIHYSNYGDYAMDYW	ko	10	0.540541	1642	88.7568	634	34.2703
1055	clonotype2344	IGH	IGHM	Hc	IGHV1-18	None	IGHJ3	CARRGYDGYPWFAYW	ko	47	2.54054	1642	88.7568	448	24.2162
1056	clonotype2346	IGH	IGHM	Hc	IGHV1-62-2	None	IGHJ2	CARHEDDGNYDYW	ko	16	0.864865	1642	88.7568	498	26.9189
1057	clonotype2347	IGH	IGHM	Hc	IGHV4-1	None	IGHJ3	CARPGAQALFAYW	ko	41	2.21622	1642	88.7568	448	24.2162
1058	clonotype2349	IGH	IGHM	Hc	IGHV1-85	None	IGHJ2	CATTMITPSYFDYW	ko	9	0.486486	1642	88.7568	498	26.9189
1059	clonotype2350	IGH	None	Hc	IGHV1-9	None	IGHJ3	CARRGEWFWFAYW	ko	27	1.45946	1642	88.7568	448	24.2162
1060	clonotype2351	IGH	IGHM	Hc	IGHV1-53	None	IGHJ2	CARGNGNYGFDYW	ko	29	1.56757	1642	88.7568	498	26.9189
1061	clonotype2352	IGH	IGHM	Hc	IGHV1-22	None	IGHJ2	CARERGWVLDYW	ko	38	2.05405	1642	88.7568	498	26.9189
1062	clonotype2356	IGH	IGHM	Hc	IGHV9-2	None	IGHJ2	CARGVWYLYYFDYW	ko	9	0.486486	1642	88.7568	498	26.9189
1063	clonotype2357	IGH	IGHM	Hc	IGHV1-55	None	IGHJ1	CARRFHYYFDVW	ko	14	0.756757	1642	88.7568	270	14.5946
1064	clonotype2358	IGH	IGHM	Hc	IGHV1-18	None	IGHJ3	CARRVYYGSRGFAYW	ko	47	2.54054	1642	88.7568	448	24.2162
1065	clonotype2359	IGH	IGHM	Hc	IGHV1-82	None	IGHJ4	CARERVYYGIMDYW	ko	21	1.13514	1642	88.7568	634	34.2703
1066	clonotype2360	IGH	IGHM	Hc	IGHV1-53	None	IGHJ3	CARERDYGSRPWFAYW	ko	29	1.56757	1642	88.7568	448	24.2162
1067	clonotype2361	IGH	IGHM	Hc	IGHV1-12	None	IGHJ3	CARFFDGYYPSWFAYW	ko	12	0.648649	1642	88.7568	448	24.2162
1068	clonotype2362	IGH	None	Hc	IGHV1-50	None	IGHJ3	CARGTAQALFAYW	ko	10	0.540541	1642	88.7568	448	24.2162
1069	clonotype2363	IGH	IGHM	Hc	IGHV5-16	None	IGHJ2	CARDYYGFDYW	ko	29	1.56757	1642	88.7568	498	26.9189
1070	clonotype2364	IGH	IGHM	Hc	IGHV3-6	None	IGHJ4	CARDRPGAMDYW	ko	135	7.2973	1642	88.7568	634	34.2703
1071	clonotype2365	IGH	IGHM	Hc	IGHV8-8	None	IGHJ4	CARNYGSSPHYW	ko	78	4.21622	1642	88.7568	634	34.2703
1072	clonotype2366	IGH	IGHM	Hc	IGHV8-8	None	IGHJ3	CARIYGNYEAWFAYW	ko	78	4.21622	1642	88.7568	448	24.2162
1073	clonotype2367	IGH	IGHM	Hc	IGHV8-8	IGHD3-2	IGHJ4	CARMGMRAKRQLRLHYAMDYW	ko	78	4.21622	9	0.486486	634	34.2703
1074	clonotype2368	IGH	IGHM	Hc	IGHV3-6	IGHD1-1	IGHJ1	CANYYGSSYGWYFDVW	ko	135	7.2973	150	8.10811	270	14.5946
1075	clonotype2370	IGH	IGHM	Hc	IGHV5-17	None	IGHJ4	CAREKLGAMDYW	ko	17	0.918919	1642	88.7568	634	34.2703
1076	clonotype2371	IGH	IGHM	Hc	IGHV1-5	None	IGHJ2	CCYLLPDYW	ko	31	1.67568	1642	88.7568	498	26.9189
1077	clonotype2372	IGH	None	Hc	IGHV9-3	None	IGHJ2	CASPIFYGYDVRASYW	ko	89	4.81081	1642	88.7568	498	26.9189
1078	clonotype2373	IGH	IGHM	Hc	IGHV9-3	None	IGHJ4	CARYGSSYENAMDYW	ko	89	4.81081	1642	88.7568	634	34.2703
1079	clonotype2374	IGH	IGHM	Hc	IGHV1-22	None	IGHJ4	CARKRNYYGTYYAMDYW	ko	38	2.05405	1642	88.7568	634	34.2703
1080	clonotype2375	IGH	IGHM	Hc	IGHV4-1	IGHD1-1	IGHJ1	CARPTITTVVATRYFDVW	ko	41	2.21622	150	8.10811	270	14.5946
1081	clonotype2376	IGH	IGHM	Hc	IGHV1-26	None	IGHJ2	CARRGLGSYYGILDYW	ko	130	7.02703	1642	88.7568	498	26.9189
1082	clonotype2377	IGH	IGHM	Hc	IGHV3-6	None	IGHJ1	CARPINPYWYFDVW	ko	135	7.2973	1642	88.7568	270	14.5946
1083	clonotype2378	IGH	IGHM	Hc	IGHV1-26	None	IGHJ2	CARTPHYYGSSPGYFDYW	ko	130	7.02703	1642	88.7568	498	26.9189
1084	clonotype2379	IGH	IGHM	Hc	IGHV1-50	None	IGHJ3	CVGDYGSSYW	ko	10	0.540541	1642	88.7568	448	24.2162
1085	clonotype2380	IGH	IGHM	Hc	IGHV1-5	None	IGHJ3	CTRYYYGNYGFAYW	ko	31	1.67568	1642	88.7568	448	24.2162
1086	clonotype2381	IGH	IGHM	Hc	IGHV1-22	None	IGHJ2	CARSRGLGKGYW	ko	38	2.05405	1642	88.7568	498	26.9189
1087	clonotype2382	IGH	IGHM	Hc	IGHV8-8	None	IGHJ2	CARIEGYGSPCYW	ko	78	4.21622	1642	88.7568	498	26.9189
1088	clonotype2383	IGH	None	Hc	IGHV8-12	None	IGHJ4	CARREGLRQGGAMDYW	ko	38	2.05405	1642	88.7568	634	34.2703
1089	clonotype2388	IGH	IGHM	Hc	IGHV1-81	None	IGHJ4	CARLLGYAMDYW	ko	39	2.10811	1642	88.7568	634	34.2703
1090	clonotype2389	IGH	IGHM	Hc	IGHV1-81	None	IGHJ2	CARSDDGYSDYW	ko	39	2.10811	1642	88.7568	498	26.9189
1091	clonotype2390	IGH	IGHM	Hc	IGHV6-3	None	IGHJ2	CTEDYDDYW	ko	82	4.43243	1642	88.7568	498	26.9189
1092	clonotype2392	IGH	IGHG2B	Hc	IGHV1-5	None	IGHJ3	CTRGGDYDVLFAYW	ko	31	1.67568	1642	88.7568	448	24.2162
1093	clonotype2393	IGH	IGHM	Hc	IGHV9-4	None	IGHJ4	CARGVVADYAMDYW	ko	17	0.918919	1642	88.7568	634	34.2703
1094	clonotype2394	IGH	IGHM	Hc	IGHV1-82	None	IGHJ4	CASFDYDFYAMDYW	ko	21	1.13514	1642	88.7568	634	34.2703
1095	clonotype2395	IGH	IGHM	Hc	IGHV1-54	None	IGHJ4	CARSGNWDGYYAMDYW	ko	15	0.810811	1642	88.7568	634	34.2703
1096	clonotype2396	IGH	IGHM	Hc	IGHV14-3	None	IGHJ2	CARWGGNLYYFDYW	ko	7	0.378378	1642	88.7568	498	26.9189
1097	clonotype2397	IGH	IGHM	Hc	IGHV6-6	None	IGHJ1	CTRQLYQGGYFDVW	ko	25	1.35135	1642	88.7568	270	14.5946
1098	clonotype2398	IGH	IGHM	Hc	IGHV2-5	None	IGHJ4	CAKSLYLAGAMDYW	ko	16	0.864865	1642	88.7568	634	34.2703
1099	clonotype2399	IGH	IGHM	Hc	IGHV1-18	None	IGHJ4	CARTQDDYAMDYW	ko	47	2.54054	1642	88.7568	634	34.2703
1100	clonotype2400	IGH	IGHM	Hc	IGHV1-58	IGHD1-1	IGHJ2	CARGIYYYGSSYGLDYW	ko	15	0.810811	150	8.10811	498	26.9189
1101	clonotype2401	IGH	IGHM	Hc	IGHV6-3	None	IGHJ2	CTFYYGSSWAYYFDYW	ko	82	4.43243	1642	88.7568	498	26.9189
1102	clonotype2402	IGH	IGHM	Hc	IGHV5-6	None	IGHJ2	CARQGDYDGDYW	ko	19	1.02703	1642	88.7568	498	26.9189
1103	clonotype2403	IGH	IGHM	Hc	IGHV1-39	None	IGHJ4	CARGTLLRAMDYW	ko	39	2.10811	1642	88.7568	634	34.2703
1104	clonotype2404	IGH	IGHM	Hc	IGHV6-3	None	IGHJ2	CTGSNYENYFDYW	ko	82	4.43243	1642	88.7568	498	26.9189
1105	clonotype2405	IGH	IGHM	Hc	IGHV1-75	None	IGHJ2	CAFGSSYDYW	ko	36	1.94595	1642	88.7568	498	26.9189
1106	clonotype2406	IGH	IGHM	Hc	IGHV11-2	IGHD1-1	IGHJ1	CMRWGDYYGSSYRYFDVW	ko	2	0.108108	150	8.10811	270	14.5946
1107	clonotype2408	IGH	IGHM	Hc	IGHV1-55	None	IGHJ4	CARIGYCPPGAMDDW	ko	14	0.756757	1642	88.7568	634	34.2703
1108	clonotype2409	IGH	IGHM	Hc	IGHV3-6	None	IGHJ3	CARDYYGAWFAYW	ko	135	7.2973	1642	88.7568	448	24.2162
1109	clonotype2411	IGH	IGHM	Hc	IGHV1-62-2	None	IGHJ2	CARHEAPTGTLDYW	ko	16	0.864865	1642	88.7568	498	26.9189
1110	clonotype2412	IGH	IGHM	Hc	IGHV1-76	None	IGHJ2	CARWGGLRQEGAFFDYW	ko	13	0.702703	1642	88.7568	498	26.9189
1111	clonotype2413	IGH	None	Hc	IGHV1-42	None	IGHJ3	CARDSFAYW	ko	15	0.810811	1642	88.7568	448	24.2162
1112	clonotype2414	IGH	IGHM	Hc	IGHV1-26	None	IGHJ4	CARFDYPYYYAMDYW	ko	130	7.02703	1642	88.7568	634	34.2703
1113	clonotype2415	IGH	IGHM	Hc	IGHV5-4	None	IGHJ4	CAMDYW	ko	23	1.24324	1642	88.7568	634	34.2703
1114	clonotype2416	IGH	IGHM	Hc	IGHV5-4	None	IGHJ1	CARDYYGTRGYFDVW	ko	23	1.24324	1642	88.7568	270	14.5946
1115	clonotype2419	IGH	IGHM	Hc	IGHV1-64	None	IGHJ4	CARDYDYDPYAMDYW	ko	36	1.94595	1642	88.7568	634	34.2703
1116	clonotype2420	IGH	IGHM	Hc	IGHV1-84	None	IGHJ4	CARFGYYAMDYW	ko	10	0.540541	1642	88.7568	634	34.2703
1117	clonotype2422	IGH	IGHM	Hc	IGHV3-6	None	IGHJ1	CARFYGNWYFDVW	ko	135	7.2973	1642	88.7568	270	14.5946
1118	clonotype2424	IGH	IGHM	Hc	IGHV1-47	None	IGHJ1	CARVTTGRYFDVW	ko	8	0.432432	1642	88.7568	270	14.5946
1119	clonotype2425	IGH	None	Hc	IGHV10-3	None	IGHJ3	CVRDGTSWFAYW	ko	33	1.78378	1642	88.7568	448	24.2162
1120	clonotype2427	IGH	IGHM	Hc	IGHV10-3	None	IGHJ2	CVRGGYYPYDYW	ko	33	1.78378	1642	88.7568	498	26.9189
1121	clonotype2429	IGH	IGHM	Hc	IGHV9-3	None	IGHJ2	CARGIDYYGSRGYYFDYW	ko	89	4.81081	1642	88.7568	498	26.9189
1122	clonotype2430	IGH	IGHM	Hc	IGHV8-4	IGHD2-5	IGHJ3	CAQAYYSNYGGFAYW	ko	3	0.162162	12	0.648649	448	24.2162
1123	clonotype2432	IGH	IGHM	Hc	IGHV1-26	None	IGHJ2	CARGAYYYGLDYW	ko	130	7.02703	1642	88.7568	498	26.9189
1124	clonotype2433	IGH	IGHM	Hc	IGHV1-58	None	IGHJ2	CARESGYW	ko	15	0.810811	1642	88.7568	498	26.9189
1125	clonotype2437	IGH	IGHM	Hc	IGHV1-22	None	IGHJ3	CARSRYYASWFAYW	ko	38	2.05405	1642	88.7568	448	24.2162
1126	clonotype2438	IGH	IGHM	Hc	IGHV1-42	IGHD1-1	IGHJ4	CARSPPLIYYYGSSLYYYAMDYW	ko	15	0.810811	150	8.10811	634	34.2703
1127	clonotype2439	IGH	IGHM	Hc	IGHV4-1	None	IGHJ4	CARPGEGAMDYW	ko	41	2.21622	1642	88.7568	634	34.2703
1128	clonotype2440	IGH	IGHM	Hc	IGHV3-6	IGHD1-1	IGHJ1	CARDGPYYYGSSFYWYFDVW	ko	135	7.2973	150	8.10811	270	14.5946
1129	clonotype2442	IGH	IGHM	Hc	IGHV6-3	None	IGHJ3	CTDGGYGSSQFAYW	ko	82	4.43243	1642	88.7568	448	24.2162
1130	clonotype2443	IGH	IGHM	Hc	IGHV1-74	None	IGHJ4	CAINGNYNYAMDYW	ko	13	0.702703	1642	88.7568	634	34.2703
1131	clonotype2444	IGH	IGHM	Hc	IGHV1-76	None	IGHJ4	CARWGYYGSYYAMDYW	ko	13	0.702703	1642	88.7568	634	34.2703
1132	clonotype2445	IGH	IGHM	Hc	IGHV1-55	None	IGHJ1	CARSYGSREYFDVW	ko	14	0.756757	1642	88.7568	270	14.5946
1133	clonotype2446	IGH	IGHM	Hc	IGHV6-6	None	IGHJ3	CTPSYYGSRKGFAYW	ko	25	1.35135	1642	88.7568	448	24.2162
1134	clonotype2447	IGH	IGHM	Hc	IGHV1-81	None	IGHJ1	CARVTTVAGYFDVW	ko	39	2.10811	1642	88.7568	270	14.5946
1135	clonotype2450	IGH	IGHM	Hc	IGHV8-8	None	IGHJ3	CARIAVDYPLAYW	ko	78	4.21622	1642	88.7568	448	24.2162
1136	clonotype2451	IGH	IGHM	Hc	IGHV6-3	None	IGHJ2	CTGGIRVYFDYW	ko	82	4.43243	1642	88.7568	498	26.9189
1137	clonotype2452	IGH	IGHM	Hc	IGHV1-76	None	IGHJ4	CARSTVVSYYAMDYW	ko	13	0.702703	1642	88.7568	634	34.2703
1138	clonotype2453	IGH	IGHM	Hc	IGHV1-53	None	IGHJ3	CAGDGYYSPFAYW	ko	29	1.56757	1642	88.7568	448	24.2162
1139	clonotype2454	IGH	IGHM	Hc	IGHV1-62-2	None	IGHJ2	CARHAPYGSSWLFDYW	ko	16	0.864865	1642	88.7568	498	26.9189
1140	clonotype2456	IGH	IGHM	Hc	IGHV1-76	None	IGHJ2	CASYYGSSSRYFDYW	ko	13	0.702703	1642	88.7568	498	26.9189
1141	clonotype2458	IGH	IGHM	Hc	IGHV1-66	IGHD2-5	IGHJ2	CAPYYSNYVPDYW	ko	6	0.324324	12	0.648649	498	26.9189
1142	clonotype2459	IGH	IGHM	Hc	IGHV3-6	None	IGHJ2	CAREGAGFDYW	ko	135	7.2973	1642	88.7568	498	26.9189
1143	clonotype2460	IGH	IGHM	Hc	IGHV1-63	None	IGHJ4	CARSDGYDNAMDYW	ko	7	0.378378	1642	88.7568	634	34.2703
1144	clonotype2461	IGH	IGHM	Hc	IGHV7-3	None	IGHJ1	CARYGRLLPYWYFDVW	ko	27	1.45946	1642	88.7568	270	14.5946
1145	clonotype2462	IGH	IGHM	Hc	IGHV1-47	None	IGHJ3	CARSSYDYDEGFAYW	ko	8	0.432432	1642	88.7568	448	24.2162
1146	clonotype2463	IGH	IGHM	Hc	IGHV8-12	None	IGHJ3	CARRQGGPFAYW	ko	38	2.05405	1642	88.7568	448	24.2162
1147	clonotype2465	IGH	IGHM	Hc	IGHV1-39	None	IGHJ2	CVIYSGISGFDYW	ko	39	2.10811	1642	88.7568	498	26.9189
1148	clonotype2466	IGH	IGHM	Hc	IGHV1-76	None	IGHJ3	CARWGGNYVREFAYW	ko	13	0.702703	1642	88.7568	448	24.2162
1149	clonotype2471	IGH	IGHM	Hc	IGHV1-36	None	IGHJ2	CARGNSSYYFDYW	ko	8	0.432432	1642	88.7568	498	26.9189
1150	clonotype2473	IGH	IGHM	Hc	IGHV3-6	None	IGHJ4	CAREKLVMDYW	ko	135	7.2973	1642	88.7568	634	34.2703
1151	clonotype2475	IGH	None	Hc	IGHV6-3	IGHD1-1	IGHJ2	CTEGITTVVATDYW	ko	82	4.43243	150	8.10811	498	26.9189
1152	clonotype2476	IGH	IGHM	Hc	IGHV1-19	None	IGHJ2	CARGLYGSSGYW	ko	49	2.64865	1642	88.7568	498	26.9189
1153	clonotype2477	IGH	IGHM	Hc	IGHV9-3	None	IGHJ1	CARDSYFYYGSSDWYFDVW	ko	89	4.81081	1642	88.7568	270	14.5946
1154	clonotype2479	IGH	IGHM	Hc	IGHV9-3	None	IGHJ1	CARSTMVTSHWYFDVW	ko	89	4.81081	1642	88.7568	270	14.5946
1155	clonotype2480	IGH	None	Hc	IGHV1-19	None	IGHJ2	CAREGLRRDALDYW	ko	49	2.64865	1642	88.7568	498	26.9189
1156	clonotype2482	IGH	IGHM	Hc	IGHV5-16	None	IGHJ2	CARDKIPGGYFDYW	ko	29	1.56757	1642	88.7568	498	26.9189
1157	clonotype2485	IGH	None	Hc	IGHV1-75	None	IGHJ2	CARLPPLYYYGSSTDYW	ko	36	1.94595	1642	88.7568	498	26.9189
1158	clonotype2487	IGH	IGHM	Hc	IGHV1-26	None	IGHJ4	CARESGITTVDPYAMDYW	ko	130	7.02703	1642	88.7568	634	34.2703
1159	clonotype2488	IGH	IGHM	Hc	IGHV5-16	None	IGHJ4	CARDRPCAMDYW	ko	29	1.56757	1642	88.7568	634	34.2703
1160	clonotype2489	IGH	IGHM	Hc	IGHV1-26	None	IGHJ4	CAREGTKYDYDGIRYYAMDYW	ko	130	7.02703	1642	88.7568	634	34.2703
1161	clonotype2490	IGH	IGHM	Hc	IGHV9-3	None	IGHJ3	CAREGDYDDSWFAYW	ko	89	4.81081	1642	88.7568	448	24.2162
1162	clonotype2491	IGH	IGHM	Hc	IGHV9-3	None	IGHJ3	CARSYYDGYHAGFAYW	ko	89	4.81081	1642	88.7568	448	24.2162
1163	clonotype2496	IGH	IGHM	Hc	IGHV6-3	None	IGHJ4	CTTPLFYAMDYW	ko	82	4.43243	1642	88.7568	634	34.2703
1164	clonotype2497	IGH	IGHM	Hc	IGHV4-1	None	IGHJ1	CARLDYGSSHGYFDVW	ko	41	2.21622	1642	88.7568	270	14.5946
1165	clonotype2498	IGH	IGHM	Hc	IGHV1-50	None	IGHJ3	CARHPFAYW	ko	10	0.540541	1642	88.7568	448	24.2162
1166	clonotype2499	IGH	IGHM	Hc	IGHV3-6	None	IGHJ3	CAREGLLLRLPGFAYW	ko	135	7.2973	1642	88.7568	448	24.2162
1167	clonotype2501	IGH	None	Hc	IGHV1-18	None	IGHJ4	CARGYDYYYYAMDYW	ko	47	2.54054	1642	88.7568	634	34.2703
1168	clonotype2504	IGH	None	Hc	IGHV8-12	IGHD2-7	IGHJ1	CARKIYYGYDWYFDVW	ko	38	2.05405	3	0.162162	270	14.5946
1169	clonotype2505	IGH	IGHM	Hc	IGHV1-53	None	IGHJ4	CARKEYSNYAMDYW	ko	29	1.56757	1642	88.7568	634	34.2703
1170	clonotype2506	IGH	IGHM	Hc	IGHV9-3	None	IGHJ3	CARHLPVAAWFAYW	ko	89	4.81081	1642	88.7568	448	24.2162
1171	clonotype2507	IGH	None	Hc	IGHV14-4	None	IGHJ2	CTTPDYFDYW	ko	24	1.2973	1642	88.7568	498	26.9189
1172	clonotype2508	IGH	None	Hc	IGHV1-5	None	IGHJ4	CTRWLLYYYAMDYW	ko	31	1.67568	1642	88.7568	634	34.2703
1173	clonotype2509	IGH	None	Hc	IGHV1-71	None	IGHJ4	CARHEDPLCNNNQGDAMDYW	ko	11	0.594595	1642	88.7568	634	34.2703
1174	clonotype2510	IGH	IGHM	Hc	IGHV15-2	None	IGHJ4	CARDGYSYYYAMDYW	ko	13	0.702703	1642	88.7568	634	34.2703
1175	clonotype2513	IGH	None	Hc	IGHV3-6	None	IGHJ3	CARDSYDYDEAWFAYW	ko	135	7.2973	1642	88.7568	448	24.2162
1176	clonotype2515	IGH	IGHM	Hc	IGHV5-16	None	IGHJ4	CARDPDYGAMDYW	ko	29	1.56757	1642	88.7568	634	34.2703
1177	clonotype2516	IGH	IGHM	Hc	IGHV8-12	None	IGHJ2	CARRGLLPFDYW	ko	38	2.05405	1642	88.7568	498	26.9189
1178	clonotype2522	IGH	IGHM	Hc	IGHV2-6	None	IGHJ4	CARHNYLYAMDYW	ko	12	0.648649	1642	88.7568	634	34.2703
1179	clonotype2523	IGH	IGHM	Hc	IGHV1-18	None	IGHJ2	CARRYGRGNFDYW	ko	47	2.54054	1642	88.7568	498	26.9189
1180	clonotype2524	IGH	IGHM	Hc	IGHV1-76	None	IGHJ4	CARGVTTVVPGNAMDYW	ko	13	0.702703	1642	88.7568	634	34.2703
1181	clonotype2525	IGH	None	Hc	IGHV9-3	None	IGHJ2	CARITTVGDYW	ko	89	4.81081	1642	88.7568	498	26.9189
1182	clonotype2526	IGH	IGHM	Hc	IGHV1-64	None	IGHJ3	CARGGGYFSWFAYW	ko	36	1.94595	1642	88.7568	448	24.2162
1183	clonotype2527	IGH	IGHM	Hc	IGHV1-19	None	IGHJ2	CARGDLYYSNLDYW	ko	49	2.64865	1642	88.7568	498	26.9189
1184	clonotype2529	IGH	IGHM	Hc	IGHV7-1	None	IGHJ4	CARDAFYDYDGLAMDYW	ko	22	1.18919	1642	88.7568	634	34.2703
1185	clonotype252	IGH	None	Hc	IGHV9-1	None	IGHJ3	CVREGSSSFAYW	ko	18	0.972973	1642	88.7568	448	24.2162
1186	clonotype2530	IGH	IGHM	Hc	IGHV4-1	None	IGHJ3	CARTDGLGFAYW	ko	41	2.21622	1642	88.7568	448	24.2162
1187	clonotype2532	IGH	IGHM	Hc	IGHV1-80	None	IGHJ2	CARWDYGSSYFDYW	ko	14	0.756757	1642	88.7568	498	26.9189
1188	clonotype2533	IGH	IGHM	Hc	IGHV9-1	None	IGHJ2	CLNWDYFDYW	ko	18	0.972973	1642	88.7568	498	26.9189
1189	clonotype2534	IGH	IGHM	Hc	IGHV1-81	None	IGHJ2	CASQATLCFDYW	ko	39	2.10811	1642	88.7568	498	26.9189
1190	clonotype2537	IGH	IGHM	Hc	IGHV1-82	None	IGHJ1	CAREFYYGSIYWYFDVW	ko	21	1.13514	1642	88.7568	270	14.5946
1191	clonotype2538	IGH	IGHM	Hc	IGHV1-69	None	IGHJ1	CARRYYGSSYWYFDVW	ko	15	0.810811	1642	88.7568	270	14.5946
1192	clonotype2539	IGH	IGHD	Hc	IGHV1-64	None	IGHJ2	CARWAAQATYFDYW	ko	36	1.94595	1642	88.7568	498	26.9189
1193	clonotype2540	IGH	IGHM	Hc	IGHV3-1	None	IGHJ2	CARAPVVAPLVDYW	ko	21	1.13514	1642	88.7568	498	26.9189
1194	clonotype2541	IGH	IGHM	Hc	IGHV10-1	IGHD1-1	IGHJ4	CVRHGYYGSSYGDYAMDYW	ko	27	1.45946	150	8.10811	634	34.2703
1195	clonotype2542	IGH	None	Hc	IGHV1-34	None	IGHJ3	CARSGIYYGFAYW	ko	5	0.27027	1642	88.7568	448	24.2162
1196	clonotype2547	IGH	IGHM	Hc	IGHV4-1	None	IGHJ1	CARHSSYWYFDVW	ko	41	2.21622	1642	88.7568	270	14.5946
1197	clonotype2550	IGH	IGHM	Hc	IGHV8-5	None	IGHJ3	CAQIAALSYW	ko	6	0.324324	1642	88.7568	448	24.2162
1198	clonotype2553	IGH	IGHM	Hc	IGHV1-71	None	IGHJ4	CARHEGYYAMDYW	ko	11	0.594595	1642	88.7568	634	34.2703
1199	clonotype2554	IGH	IGHM	Hc	IGHV1-26	None	IGHJ4	CARLRSYAMDYW	ko	130	7.02703	1642	88.7568	634	34.2703
1200	clonotype2555	IGH	IGHM	Hc	IGHV1-22	None	IGHJ3	CAREQMGFAYW	ko	38	2.05405	1642	88.7568	448	24.2162
1201	clonotype2556	IGH	IGHM	Hc	IGHV3-6	None	IGHJ4	CAREVLDTGAYYYAMDYW	ko	135	7.2973	1642	88.7568	634	34.2703
1202	clonotype2557	IGH	IGHM	Hc	IGHV1-85	None	IGHJ1	CARSYYRKGYFDVW	ko	9	0.486486	1642	88.7568	270	14.5946
1203	clonotype2559	IGH	None	Hc	IGHV8-12	None	IGHJ3	CARREGDYYGSWFAYW	ko	38	2.05405	1642	88.7568	448	24.2162
1204	clonotype2560	IGH	IGHM	Hc	IGHV10-1	None	IGHJ2	CVRQVDYYQYYFDYW	ko	27	1.45946	1642	88.7568	498	26.9189
1205	clonotype2563	IGH	IGHM	Hc	IGHV1-52	None	IGHJ2	CARDYALLFDYW	ko	6	0.324324	1642	88.7568	498	26.9189
1206	clonotype2564	IGH	IGHM	Hc	IGHV1-54	None	IGHJ2	CARGGTVVARNFDYW	ko	15	0.810811	1642	88.7568	498	26.9189
1207	clonotype2565	IGH	IGHM	Hc	IGHV1-78	None	IGHJ3	CARSGYYDGYSWFAYW	ko	26	1.40541	1642	88.7568	448	24.2162
1208	clonotype2568	IGH	IGHM	Hc	IGHV10-1	None	IGHJ2	CVRDYYGSSPFFDYW	ko	27	1.45946	1642	88.7568	498	26.9189
1209	clonotype2569	IGH	IGHM	Hc	IGHV5-12	None	IGHJ3	CAKYGMAYW	ko	10	0.540541	1642	88.7568	448	24.2162
1210	clonotype2570	IGH	IGHM	Hc	IGHV6-3	None	IGHJ2	CTGDYYGSSFDYW	ko	82	4.43243	1642	88.7568	498	26.9189
1211	clonotype2574	IGH	IGHM	Hc	IGHV3-6	None	IGHJ4	CARCRDYDYDRYAMDYW	ko	135	7.2973	1642	88.7568	634	34.2703
1212	clonotype2576	IGH	IGHM	Hc	IGHV1-64	None	IGHJ4	CARGRNAMDYW	ko	36	1.94595	1642	88.7568	634	34.2703
1213	clonotype2577	IGH	IGHM	Hc	IGHV1-12	None	IGHJ2	CARGIPYGNYVPFYFDYW	ko	12	0.648649	1642	88.7568	498	26.9189
1214	clonotype2578	IGH	IGHM	Hc	IGHV5-16	None	IGHJ3	CARGGGYHGTWFAYW	ko	29	1.56757	1642	88.7568	448	24.2162
1215	clonotype2580	IGH	IGHM	Hc	IGHV8-8	None	IGHJ3	CARIYYGSGAWFAYW	ko	78	4.21622	1642	88.7568	448	24.2162
1216	clonotype2581	IGH	IGHM	Hc	IGHV1-26	None	IGHJ3	CARGDDYLPFAYW	ko	130	7.02703	1642	88.7568	448	24.2162
1217	clonotype2583	IGH	IGHM	Hc	IGHV9-3	None	IGHJ2	CARGPLLSYGSSRYYFDYW	ko	89	4.81081	1642	88.7568	498	26.9189
1218	clonotype2587	IGH	IGHM	Hc	IGHV3-6	None	IGHJ3	CARGGGYYDGYYVGSWFAYW	ko	135	7.2973	1642	88.7568	448	24.2162
1219	clonotype2590	IGH	IGHM	Hc	IGHV1-15	None	IGHJ1	CTRGYYDYDRINWYFDVW	ko	15	0.810811	1642	88.7568	270	14.5946
1220	clonotype2591	IGH	IGHM	Hc	IGHV1-39	None	IGHJ2	CARVDLYYFDYW	ko	39	2.10811	1642	88.7568	498	26.9189
1221	clonotype2592	IGH	IGHM	Hc	IGHV3-6	IGHD1-1	IGHJ1	CARGHYYGSSSWYFDVW	ko	135	7.2973	150	8.10811	270	14.5946
1222	clonotype2593	IGH	IGHM	Hc	IGHV14-2	None	IGHJ3	CARLDGYYAWFAYW	ko	14	0.756757	1642	88.7568	448	24.2162
1223	clonotype2598	IGH	IGHM	Hc	IGHV15-2	None	IGHJ2	CARFEDVFGGDSDYW	ko	13	0.702703	1642	88.7568	498	26.9189
1224	clonotype2601	IGH	IGHM	Hc	IGHV1-39	None	IGHJ3	CARADYGSPFAYW	ko	39	2.10811	1642	88.7568	448	24.2162
1225	clonotype2603	IGH	IGHM	Hc	IGHV4-1	None	IGHJ3	CARQELWFAYW	ko	41	2.21622	1642	88.7568	448	24.2162
1226	clonotype2604	IGH	IGHM	Hc	IGHV9-3	None	IGHJ4	CARCYYDYDGYYAMDYW	ko	89	4.81081	1642	88.7568	634	34.2703
1227	clonotype2605	IGH	IGHM	Hc	IGHV1-12	None	IGHJ4	CARRYGSSYDAMDYW	ko	12	0.648649	1642	88.7568	634	34.2703
1228	clonotype2606	IGH	None	Hc	IGHV1-26	None	IGHJ2	CARGGNGNYDYFDYW	ko	130	7.02703	1642	88.7568	498	26.9189
1229	clonotype2607	IGH	IGHM	Hc	IGHV1-53	None	IGHJ1	CAIFPWYFDVW	ko	29	1.56757	1642	88.7568	270	14.5946
1230	clonotype2608	IGH	IGHM	Hc	IGHV1-74	None	IGHJ3	CAIISNYVAYW	ko	13	0.702703	1642	88.7568	448	24.2162
1231	clonotype2609	IGH	IGHM	Hc	IGHV7-3	None	IGHJ3	CARKGDSGYEAYW	ko	27	1.45946	1642	88.7568	448	24.2162
1232	clonotype2611	IGH	IGHM	Hc	IGHV5-16	IGHD1-1	IGHJ2	CARITTVVATTSYYFDYW	ko	29	1.56757	150	8.10811	498	26.9189
1233	clonotype2612	IGH	IGHM	Hc	IGHV1-61	IGHD2-8	IGHJ3	CARAFYYGNYRAYW	ko	5	0.27027	5	0.27027	448	24.2162
1234	clonotype2613	IGH	IGHM	Hc	IGHV7-3	None	IGHJ4	CARYAGYYAMDYW	ko	27	1.45946	1642	88.7568	634	34.2703
1235	clonotype2614	IGH	IGHM	Hc	IGHV1-18	IGHD1-1	IGHJ4	CVRSEGINYYGSSLPYAMDYW	ko	47	2.54054	150	8.10811	634	34.2703
1236	clonotype2615	IGH	IGHM	Hc	IGHV13-2	None	IGHJ1	CSRSYYGNYLWYFDVW	ko	18	0.972973	1642	88.7568	270	14.5946
1237	clonotype2617	IGH	IGHM	Hc	IGHV6-3	IGHD1-1	IGHJ4	CTGRYYYGSSFYAMDYW	ko	82	4.43243	150	8.10811	634	34.2703
1238	clonotype2618	IGH	None	Hc	IGHV1-26	None	IGHJ4	CARFLYGSSFLHAMDYW	ko	130	7.02703	1642	88.7568	634	34.2703
1239	clonotype2622	IGH	None	Hc	IGHV1-58	None	IGHJ1	CARSGLLTRYFDVW	ko	15	0.810811	1642	88.7568	270	14.5946
1240	clonotype2623	IGH	IGHM	Hc	IGHV6-3	None	IGHJ4	CTGPYDGYYEDAMDYW	ko	82	4.43243	1642	88.7568	634	34.2703
1241	clonotype2624	IGH	IGHM	Hc	IGHV1-5	None	IGHJ2	CTRDYGSRGDYFDYW	ko	31	1.67568	1642	88.7568	498	26.9189
1242	clonotype2626	IGH	IGHM	Hc	IGHV6-3	IGHD1-1	IGHJ1	CTKITTVVATRYFDVW	ko	82	4.43243	150	8.10811	270	14.5946
1243	clonotype2627	IGH	IGHM	Hc	IGHV3-6	None	IGHJ3	CARDDYAWFAYW	ko	135	7.2973	1642	88.7568	448	24.2162
1244	clonotype2628	IGH	IGHM	Hc	IGHV3-6	None	IGHJ2	CARDIYYSNYGGYFDYW	ko	135	7.2973	1642	88.7568	498	26.9189
1245	clonotype2631	IGH	IGHM	Hc	IGHV4-1	None	IGHJ4	CAREDDYDAYYAMDYW	ko	41	2.21622	1642	88.7568	634	34.2703
1246	clonotype2633	IGH	IGHM	Hc	IGHV3-6	None	IGHJ3	CARDHYYRGFAYW	ko	135	7.2973	1642	88.7568	448	24.2162
1247	clonotype2634	IGH	IGHM	Hc	IGHV8-8	None	IGHJ2	CARIPLLLRSPLDYW	ko	78	4.21622	1642	88.7568	498	26.9189
1248	clonotype2638	IGH	IGHM	Hc	IGHV3-1	None	IGHJ4	CARGGGSEAMDYW	ko	21	1.13514	1642	88.7568	634	34.2703
1249	clonotype2639	IGH	IGHM	Hc	IGHV1-26	IGHD1-1	IGHJ2	CARAPIYYYGSSPYYFDYW	ko	130	7.02703	150	8.10811	498	26.9189
1250	clonotype2640	IGH	IGHM	Hc	IGHV6-3	None	IGHJ3	CTGDFVYYRFAYW	ko	82	4.43243	1642	88.7568	448	24.2162
1251	clonotype2641	IGH	IGHM	Hc	IGHV1-62-2	None	IGHJ4	CARHEGEWGYAMDYW	ko	16	0.864865	1642	88.7568	634	34.2703
1252	clonotype2642	IGH	IGHM	Hc	IGHV1-78	None	IGHJ4	CARYDSFMDYW	ko	26	1.40541	1642	88.7568	634	34.2703
1253	clonotype2643	IGH	IGHM	Hc	IGHV3-1	None	IGHJ3	CARWDYYDYDDAYW	ko	21	1.13514	1642	88.7568	448	24.2162
1254	clonotype2644	IGH	IGHM	Hc	IGHV7-1	None	IGHJ3	CARDDYDYAWFAYW	ko	22	1.18919	1642	88.7568	448	24.2162
1255	clonotype2645	IGH	IGHM	Hc	IGHV3-6	None	IGHJ4	CASYAIYYAMDYW	ko	135	7.2973	1642	88.7568	634	34.2703
1256	clonotype2647	IGH	IGHM	Hc	IGHV1-62-2	None	IGHJ3	CARHEEGGRFAYW	ko	16	0.864865	1642	88.7568	448	24.2162
1257	clonotype2649	IGH	IGHM	Hc	IGHV2-9-1	None	IGHJ4	CASVYDYYAMDYW	ko	21	1.13514	1642	88.7568	634	34.2703
1258	clonotype2650	IGH	IGHM	Hc	IGHV1-26	None	IGHJ2	CARLLRYYFDYW	ko	130	7.02703	1642	88.7568	498	26.9189
1259	clonotype2652	IGH	IGHM	Hc	IGHV1-54	None	IGHJ4	CARILYEDAMDYW	ko	15	0.810811	1642	88.7568	634	34.2703
1260	clonotype2655	IGH	IGHM	Hc	IGHV1-26	IGHD1-1	IGHJ1	CAKILHYYGSSYEYFDVW	ko	130	7.02703	150	8.10811	270	14.5946
1261	clonotype2658	IGH	IGHM	Hc	IGHV5-9-1	None	IGHJ3	CTREGLPFAYW	ko	12	0.648649	1642	88.7568	448	24.2162
1262	clonotype2659	IGH	None	Hc	IGHV10-1	None	IGHJ3	CVVDGYYVAWFAYW	ko	27	1.45946	1642	88.7568	448	24.2162
1263	clonotype2660	IGH	None	Hc	IGHV5-6	IGHD1-1	IGHJ2	CARRDHYGSSYKGSFDYW	ko	19	1.02703	150	8.10811	498	26.9189
1264	clonotype2661	IGH	None	Hc	IGHV1-77	None	IGHJ2	CARPTTVVANYFDYW	ko	5	0.27027	1642	88.7568	498	26.9189
1265	clonotype2663	IGH	None	Hc	IGHV10-1	None	IGHJ3	CVRQYGSSYGFAYW	ko	27	1.45946	1642	88.7568	448	24.2162
1266	clonotype2664	IGH	IGHM	Hc	IGHV3-6	None	IGHJ2	CARKDYYGSIDYW	ko	135	7.2973	1642	88.7568	498	26.9189
1267	clonotype2667	IGH	IGHM	Hc	IGHV8-8	None	IGHJ3	CARIYYDHDWFAYW	ko	78	4.21622	1642	88.7568	448	24.2162
1268	clonotype2669	IGH	IGHM	Hc	IGHV1-26	None	IGHJ2	CARWGRWLLFDYW	ko	130	7.02703	1642	88.7568	498	26.9189
1269	clonotype2673	IGH	IGHM	Hc	IGHV9-4	None	IGHJ2	CARWLGGDYW	ko	17	0.918919	1642	88.7568	498	26.9189
1270	clonotype2674	IGH	IGHM	Hc	IGHV3-6	None	IGHJ3	CARDPAYW	ko	135	7.2973	1642	88.7568	448	24.2162
1271	clonotype2675	IGH	IGHM	Hc	IGHV7-3	None	IGHJ4	CASYYGSSYNYAMDYW	ko	27	1.45946	1642	88.7568	634	34.2703
1272	clonotype2679	IGH	None	Hc	IGHV9-1	None	IGHJ3	CVYDSGTPFAYW	ko	18	0.972973	1642	88.7568	448	24.2162
1273	clonotype2681	IGH	IGHM	Hc	IGHV3-1	None	IGHJ1	CARDDYDRYFDVW	ko	21	1.13514	1642	88.7568	270	14.5946
1274	clonotype2682	IGH	IGHM	Hc	IGHV1-39	None	IGHJ4	CARYDGYFYYAMDYW	ko	39	2.10811	1642	88.7568	634	34.2703
1275	clonotype2683	IGH	None	Hc	IGHV3-6	None	IGHJ2	CAGYYDLFDYW	ko	135	7.2973	1642	88.7568	498	26.9189
1276	clonotype2684	IGH	IGHM	Hc	IGHV6-6	None	IGHJ3	CTLNWDGLFAYW	ko	25	1.35135	1642	88.7568	448	24.2162
1277	clonotype2685	IGH	IGHM	Hc	IGHV1-62-2	None	IGHJ4	CARHEEIYYGSSLDYW	ko	16	0.864865	1642	88.7568	634	34.2703
1278	clonotype2686	IGH	IGHM	Hc	IGHV1-15	None	IGHJ3	CTRERW	ko	15	0.810811	1642	88.7568	448	24.2162
1279	clonotype2688	IGH	IGHM	Hc	IGHV3-6	None	IGHJ3	CARENYSNLGGFAYW	ko	135	7.2973	1642	88.7568	448	24.2162
1280	clonotype2689	IGH	None	Hc	IGHV1-54	None	IGHJ3	CARGTTVPFAYW	ko	15	0.810811	1642	88.7568	448	24.2162
1281	clonotype2690	IGH	IGHM	Hc	IGHV1-84	None	IGHJ4	CASSILNWGAMDYW	ko	10	0.540541	1642	88.7568	634	34.2703
1282	clonotype2691	IGH	IGHM	Hc	IGHV9-3	None	IGHJ4	CARSRLYYGHRLYAMDYW	ko	89	4.81081	1642	88.7568	634	34.2703
1283	clonotype2692	IGH	IGHM	Hc	IGHV10-3	IGHD2-5	IGHJ4	CVREAYYSNYEDAMDYW	ko	33	1.78378	12	0.648649	634	34.2703
1284	clonotype2693	IGH	IGHM	Hc	IGHV15-2	IGHD1-1	IGHJ1	CARNYYGSSYGYFDVW	ko	13	0.702703	150	8.10811	270	14.5946
1285	clonotype2694	IGH	IGHM	Hc	IGHV8-8	None	IGHJ4	CAREALYYSNYLYAMDYW	ko	78	4.21622	1642	88.7568	634	34.2703
1286	clonotype2695	IGH	IGHM	Hc	IGHV1-39	None	IGHJ4	CARFDGGNYYAMDYW	ko	39	2.10811	1642	88.7568	634	34.2703
1287	clonotype2696	IGH	IGHM	Hc	IGHV8-8	IGHD4-1	IGHJ3	CARIVEEGPNWDLFAYW	ko	78	4.21622	4	0.216216	448	24.2162
1288	clonotype2697	IGH	IGHM	Hc	IGHV6-3	None	IGHJ2	CTGGDYW	ko	82	4.43243	1642	88.7568	498	26.9189
1289	clonotype2698	IGH	IGHM	Hc	IGHV5-17	None	IGHJ2	CARYRYFDYW	ko	17	0.918919	1642	88.7568	498	26.9189
1290	clonotype2701	IGH	IGHM	Hc	IGHV2-2	None	IGHJ3	CARKGGIYYDLRAFAYW	ko	48	2.59459	1642	88.7568	448	24.2162
1291	clonotype2702	IGH	IGHM	Hc	IGHV3-6	None	IGHJ2	CARGHYFDYW	ko	135	7.2973	1642	88.7568	498	26.9189
1292	clonotype2704	IGH	IGHM	Hc	IGHV3-6	None	IGHJ4	CARVVLRYYAMDYW	ko	135	7.2973	1642	88.7568	634	34.2703
1293	clonotype2707	IGH	IGHD	Hc	IGHV1-19	None	IGHJ2	CAREGDDGYYVIDYW	ko	49	2.64865	1642	88.7568	498	26.9189
1294	clonotype2708	IGH	IGHM	Hc	IGHV1-15	None	IGHJ1	CTLFYYGSSHWYFDVW	ko	15	0.810811	1642	88.7568	270	14.5946
1295	clonotype2710	IGH	IGHM	Hc	IGHV8-8	None	IGHJ1	CARIRILYYYGLGGYFDVW	ko	78	4.21622	1642	88.7568	270	14.5946
1296	clonotype2712	IGH	IGHM	Hc	IGHV1-22	None	IGHJ3	CAGSGYDGYSWFAYW	ko	38	2.05405	1642	88.7568	448	24.2162
1297	clonotype2713	IGH	IGHM	Hc	IGHV10-1	None	IGHJ3	CVRPYDGYAWFAYW	ko	27	1.45946	1642	88.7568	448	24.2162
1298	clonotype2714	IGH	IGHM	Hc	IGHV8-12	None	IGHJ2	CARRSFNWVFDYW	ko	38	2.05405	1642	88.7568	498	26.9189
1299	clonotype2715	IGH	IGHM	Hc	IGHV8-8	None	IGHJ2	CARITNGSSYKNYFDYW	ko	78	4.21622	1642	88.7568	498	26.9189
1300	clonotype2716	IGH	IGHM	Hc	IGHV6-3	None	IGHJ4	CTTLTILLRQRAMDYW	ko	82	4.43243	1642	88.7568	634	34.2703
1301	clonotype2717	IGH	IGHM	Hc	IGHV3-6	None	IGHJ1	CARLWYFDVW	ko	135	7.2973	1642	88.7568	270	14.5946
1302	clonotype2718	IGH	IGHM	Hc	IGHV1-19	None	IGHJ4	CARGVVDYYAMDYW	ko	49	2.64865	1642	88.7568	634	34.2703
1303	clonotype2719	IGH	IGHM	Hc	IGHV1-39	None	IGHJ2	CARERDGYPYYFDYW	ko	39	2.10811	1642	88.7568	498	26.9189
1304	clonotype2723	IGH	None	Hc	IGHV1-26	IGHD1-1	IGHJ2	CARGSYYYGSSSDYW	ko	130	7.02703	150	8.10811	498	26.9189
1305	clonotype2725	IGH	IGHM	Hc	IGHV1-64	None	IGHJ4	CARPYDYDGYYAMDYW	ko	36	1.94595	1642	88.7568	634	34.2703
1306	clonotype2726	IGH	IGHM	Hc	IGHV1-71	None	IGHJ3	CARHEDRYGKFAYW	ko	11	0.594595	1642	88.7568	448	24.2162
1307	clonotype2728	IGH	None	Hc	IGHV1-75	None	IGHJ4	CARSGGDYAMDYW	ko	36	1.94595	1642	88.7568	634	34.2703
1308	clonotype2729	IGH	IGHM	Hc	IGHV8-12	None	IGHJ4	CARRAEVLYAMDYW	ko	38	2.05405	1642	88.7568	634	34.2703
1309	clonotype2730	IGH	IGHM	Hc	IGHV3-4	None	IGHJ1	CARGRDYWYFDVW	ko	4	0.216216	1642	88.7568	270	14.5946
1310	clonotype2732	IGH	IGHM	Hc	IGHV10-3	None	IGHJ2	CVRDGPHGYFDYW	ko	33	1.78378	1642	88.7568	498	26.9189
1311	clonotype2733	IGH	None	Hc	IGHV3-6	None	IGHJ1	CARRNYDSSLYWYFDVW	ko	135	7.2973	1642	88.7568	270	14.5946
1312	clonotype2738	IGH	IGHM	Hc	IGHV10-3	None	IGHJ4	CVREGWAYYAMDYW	ko	33	1.78378	1642	88.7568	634	34.2703
1313	clonotype2740	IGH	IGHM	Hc	IGHV3-6	None	IGHJ1	CARGGSSLYWYFDVW	ko	135	7.2973	1642	88.7568	270	14.5946
1314	clonotype2741	IGH	IGHM	Hc	IGHV1-78	None	IGHJ3	CAYSAWFAYW	ko	26	1.40541	1642	88.7568	448	24.2162
1315	clonotype2742	IGH	IGHM	Hc	IGHV1-26	None	IGHJ1	CARWNYGSSYGYFDVW	ko	130	7.02703	1642	88.7568	270	14.5946
1316	clonotype2747	IGH	IGHM	Hc	IGHV1-26	None	IGHJ4	CARDYSNYVYAMDYW	ko	130	7.02703	1642	88.7568	634	34.2703
1317	clonotype2749	IGH	IGHM	Hc	IGHV3-6	None	IGHJ4	CALIYYDYEGDAMDYW	ko	135	7.2973	1642	88.7568	634	34.2703
1318	clonotype2751	IGH	IGHM	Hc	IGHV5-4	None	IGHJ2	CAREGGYYYGRGGSYFDYW	ko	23	1.24324	1642	88.7568	498	26.9189
1319	clonotype2753	IGH	IGHM	Hc	IGHV6-3	None	IGHJ3	CTENDPFAYW	ko	82	4.43243	1642	88.7568	448	24.2162
1320	clonotype2758	IGH	IGHM	Hc	IGHV1-26	None	IGHJ3	CARGDYSNLFAYW	ko	130	7.02703	1642	88.7568	448	24.2162
1321	clonotype2759	IGH	IGHM	Hc	IGHV6-3	None	IGHJ3	CTKHYDYDGFWFAYW	ko	82	4.43243	1642	88.7568	448	24.2162
1322	clonotype2762	IGH	IGHM	Hc	IGHV6-3	None	IGHJ2	CTRGWLLSYFDYW	ko	82	4.43243	1642	88.7568	498	26.9189
1323	clonotype2764	IGH	IGHM	Hc	IGHV3-6	None	IGHJ3	CARDQNWDGFAYW	ko	135	7.2973	1642	88.7568	448	24.2162
1324	clonotype2769	IGH	IGHM	Hc	IGHV8-8	None	IGHJ1	CARMNYGSSFYWYFDVW	ko	78	4.21622	1642	88.7568	270	14.5946
1325	clonotype2771	IGH	IGHM	Hc	IGHV6-3	IGHD1-1	IGHJ2	CTGYYYGSSYDFDYW	ko	82	4.43243	150	8.10811	498	26.9189
1326	clonotype2772	IGH	None	Hc	IGHV3-6	None	IGHJ1	CARRISYDSYWYFDVW	ko	135	7.2973	1642	88.7568	270	14.5946
1327	clonotype302	IGH	IGHM	Hc	IGHV3-6	None	IGHJ3	CARGDYGAWFAYW	ko	135	7.2973	1642	88.7568	448	24.2162
1328	clonotype308	IGH	IGHM	Hc	IGHV1-26	None	IGHJ3	CARSGIYYGNFFAYW	ko	130	7.02703	1642	88.7568	448	24.2162
1329	clonotype309	IGH	IGHM	Hc	IGHV1-54	None	IGHJ3	CARGKLTGSWFAYW	ko	15	0.810811	1642	88.7568	448	24.2162
1330	clonotype311	IGH	IGHM	Hc	IGHV2-2	None	IGHJ3	CARSSLYDYDGGAWFAYW	ko	48	2.59459	1642	88.7568	448	24.2162
1331	clonotype312	IGH	IGHM	Hc	IGHV9-3	None	IGHJ1	CARELITTVPHWYFDVW	ko	89	4.81081	1642	88.7568	270	14.5946
1332	clonotype314	IGH	None	Hc	IGHV4-1	None	IGHJ4	CARSWGWLLPDAMDYW	ko	41	2.21622	1642	88.7568	634	34.2703
1333	clonotype315	IGH	IGHM	Hc	IGHV1-22	None	IGHJ3	CARRFSGAWFAYW	ko	38	2.05405	1642	88.7568	448	24.2162
1334	clonotype316	IGH	IGHM	Hc	IGHV7-3	None	IGHJ4	CARYSFYAMDYW	ko	27	1.45946	1642	88.7568	634	34.2703
1335	clonotype317	IGH	IGHM	Hc	IGHV1-50	None	IGHJ2	CARCDYDGYFDYW	ko	10	0.540541	1642	88.7568	498	26.9189
1336	clonotype319	IGH	IGHM	Hc	IGHV1-53	None	IGHJ3	CARIPGYDYGAWFAYW	ko	29	1.56757	1642	88.7568	448	24.2162
1337	clonotype320	IGH	IGHM	Hc	IGHV7-1	None	IGHJ3	CARESYYSNSFAYW	ko	22	1.18919	1642	88.7568	448	24.2162
1338	clonotype321	IGH	IGHM	Hc	IGHV3-6	None	IGHJ2	CARVDYGSSYYFDYW	ko	135	7.2973	1642	88.7568	498	26.9189
1339	clonotype322	IGH	IGHM	Hc	IGHV1-53	None	IGHJ2	CARVPYDGYYLYFDYW	ko	29	1.56757	1642	88.7568	498	26.9189
1340	clonotype323	IGH	IGHM	Hc	IGHV1-78	None	IGHJ2	CARDYYGSRRYFDYW	ko	26	1.40541	1642	88.7568	498	26.9189
1341	clonotype324	IGH	IGHM	Hc	IGHV14-4	None	IGHJ2	CTTGRGNSFDYW	ko	24	1.2973	1642	88.7568	498	26.9189
1342	clonotype325	IGH	IGHM	Hc	IGHV9-3	None	IGHJ2	CARRDYGTLDYW	ko	89	4.81081	1642	88.7568	498	26.9189
1343	clonotype326	IGH	IGHM	Hc	IGHV1-19	None	IGHJ4	CARDWDGYAMDYW	ko	49	2.64865	1642	88.7568	634	34.2703
1344	clonotype328	IGH	IGHM	Hc	IGHV1-26	None	IGHJ2	CARCYYGSTLDYW	ko	130	7.02703	1642	88.7568	498	26.9189
1345	clonotype329	IGH	IGHM	Hc	IGHV1-39	None	IGHJ4	CARDGNYLYYYAMDYW	ko	39	2.10811	1642	88.7568	634	34.2703
1346	clonotype330	IGH	IGHM	Hc	IGHV2-9-1	None	IGHJ4	CAREETGTSLYYAMDYW	ko	21	1.13514	1642	88.7568	634	34.2703
1347	clonotype331	IGH	IGHM	Hc	IGHV3-6	None	IGHJ3	CARDPPLRW	ko	135	7.2973	1642	88.7568	448	24.2162
1348	clonotype333	IGH	IGHM	Hc	IGHV8-12	None	IGHJ4	CARRPHYGSSHPYAMDYW	ko	38	2.05405	1642	88.7568	634	34.2703
1349	clonotype335	IGH	IGHM	Hc	IGHV9-3	None	IGHJ3	CARVYGNYPAWFAYW	ko	89	4.81081	1642	88.7568	448	24.2162
1350	clonotype336	IGH	IGHM	Hc	IGHV5-16	None	IGHJ4	CARGLDYW	ko	29	1.56757	1642	88.7568	634	34.2703
1351	clonotype337	IGH	None	Hc	IGHV8-8	None	IGHJ2	CARIGGYDYEGVDYW	ko	78	4.21622	1642	88.7568	498	26.9189
1352	clonotype338	IGH	IGHM	Hc	IGHV3-1	None	IGHJ1	CARGSSPLYFDVW	ko	21	1.13514	1642	88.7568	270	14.5946
1353	clonotype340	IGH	IGHM	Hc	IGHV10-1	None	IGHJ4	CVRHGYYAMDYW	ko	27	1.45946	1642	88.7568	634	34.2703
1354	clonotype341	IGH	None	Hc	IGHV1-37	None	IGHJ3	CANYAWFAYW	ko	3	0.162162	1642	88.7568	448	24.2162
1355	clonotype342	IGH	IGHM	Hc	IGHV1-26	None	IGHJ4	CARAYYYGSRGVAMDYW	ko	130	7.02703	1642	88.7568	634	34.2703
1356	clonotype343	IGH	IGHM	Hc	IGHV3-3	None	IGHJ4	CAREGYYGSMDYW	ko	5	0.27027	1642	88.7568	634	34.2703
1357	clonotype344	IGH	IGHM	Hc	IGHV9-3	None	IGHJ4	CARDLYYSTYYAMDYW	ko	89	4.81081	1642	88.7568	634	34.2703
1358	clonotype345	IGH	IGHM	Hc	IGHV6-6	None	IGHJ3	CKGGTTVVGPYW	ko	25	1.35135	1642	88.7568	448	24.2162
1359	clonotype346	IGH	IGHM	Hc	IGHV6-3	None	IGHJ4	CTGSRWLLHYAMDYW	ko	82	4.43243	1642	88.7568	634	34.2703
1360	clonotype348	IGH	None	Hc	IGHV1-77	IGHD2-4	IGHJ2	CARGGIYYDYDEGYYFDYW	ko	5	0.27027	18	0.972973	498	26.9189
1361	clonotype349	IGH	IGHM	Hc	IGHV1-85	None	IGHJ2	CALTTARYFDYW	ko	9	0.486486	1642	88.7568	498	26.9189
1362	clonotype350	IGH	IGHM	Hc	IGHV1-39	None	IGHJ2	CARLGGFDYW	ko	39	2.10811	1642	88.7568	498	26.9189
1363	clonotype351	IGH	IGHM	Hc	IGHV2-2	None	IGHJ4	CARNFHVYYAMDYW	ko	48	2.59459	1642	88.7568	634	34.2703
1364	clonotype353	IGH	IGHM	Hc	IGHV3-1	None	IGHJ3	CASSHDGYHPFAYW	ko	21	1.13514	1642	88.7568	448	24.2162
1365	clonotype354	IGH	None	Hc	IGHV5-12	None	IGHJ3	CARRFMITSFAYW	ko	10	0.540541	1642	88.7568	448	24.2162
1366	clonotype356	IGH	IGHM	Hc	IGHV1-75	None	IGHJ3	CARRDYGKGFAYW	ko	36	1.94595	1642	88.7568	448	24.2162
1367	clonotype357	IGH	IGHM	Hc	IGHV1-20	None	IGHJ4	CARVRVPQDYAMDYW	ko	7	0.378378	1642	88.7568	634	34.2703
1368	clonotype358	IGH	IGHM	Hc	IGHV1-15	None	IGHJ2	CTRGPVGPLDYFDYW	ko	15	0.810811	1642	88.7568	498	26.9189
1369	clonotype359	IGH	IGHM	Hc	IGHV1-19	None	IGHJ4	CANIYYYAMDYW	ko	49	2.64865	1642	88.7568	634	34.2703
1370	clonotype360	IGH	IGHM	Hc	IGHV1-47	None	IGHJ3	CARVGDFSWFAYW	ko	8	0.432432	1642	88.7568	448	24.2162
1371	clonotype361	IGH	IGHM	Hc	IGHV6-6	None	IGHJ3	CTRLELNPFAYW	ko	25	1.35135	1642	88.7568	448	24.2162
1372	clonotype362	IGH	IGHM	Hc	IGHV1-53	None	IGHJ2	CARWGSFDYW	ko	29	1.56757	1642	88.7568	498	26.9189
1373	clonotype363	IGH	IGHM	Hc	IGHV6-3	None	IGHJ2	CTVPDYW	ko	82	4.43243	1642	88.7568	498	26.9189
1374	clonotype364	IGH	IGHM	Hc	IGHV7-3	None	IGHJ4	CARYGDYDYPYYAMDYW	ko	27	1.45946	1642	88.7568	634	34.2703
1375	clonotype366	IGH	IGHM	Hc	IGHV1-75	None	IGHJ2	CARSQGVRYYFDYW	ko	36	1.94595	1642	88.7568	498	26.9189
1376	clonotype369	IGH	IGHM	Hc	IGHV9-3	None	IGHJ4	CARPTVVAPAYYAMDYW	ko	89	4.81081	1642	88.7568	634	34.2703
1377	clonotype370	IGH	IGHM	Hc	IGHV1-39	None	IGHJ1	CARFYGNYPYWYFDVW	ko	39	2.10811	1642	88.7568	270	14.5946
1378	clonotype371	IGH	IGHM	Hc	IGHV1-75	None	IGHJ4	CARSYYYGMGFYAMDYW	ko	36	1.94595	1642	88.7568	634	34.2703
1379	clonotype372	IGH	IGHM	Hc	IGHV8-8	None	IGHJ4	CARIGGGGAMDYW	ko	78	4.21622	1642	88.7568	634	34.2703
1380	clonotype374	IGH	IGHM	Hc	IGHV4-1	None	IGHJ4	CARRDSKAMDYW	ko	41	2.21622	1642	88.7568	634	34.2703
1381	clonotype375	IGH	None	Hc	IGHV1-26	IGHD2-4	IGHJ4	CASGDIYYDYDGLAMDYW	ko	130	7.02703	18	0.972973	634	34.2703
1382	clonotype377	IGH	IGHM	Hc	IGHV9-3	None	IGHJ2	CARYDTTVVATREENYFDYW	ko	89	4.81081	1642	88.7568	498	26.9189
1383	clonotype378	IGH	IGHM	Hc	IGHV1-9	None	IGHJ4	CARRYYYGRDYYAMDYW	ko	27	1.45946	1642	88.7568	634	34.2703
1384	clonotype379	IGH	IGHM	Hc	IGHV9-3	None	IGHJ4	CARLGLSYAMDYW	ko	89	4.81081	1642	88.7568	634	34.2703
1385	clonotype383	IGH	IGHM	Hc	IGHV1-26	None	IGHJ4	CARWGTTVVALRYYAMDYW	ko	130	7.02703	1642	88.7568	634	34.2703
1386	clonotype384	IGH	None	Hc	IGHV14-4	None	IGHJ3	CSGSWTYW	ko	24	1.2973	1642	88.7568	448	24.2162
1387	clonotype385	IGH	IGHM	Hc	IGHV8-8	None	IGHJ3	CARGGYYEFAYW	ko	78	4.21622	1642	88.7568	448	24.2162
1388	clonotype387	IGH	IGHM	Hc	IGHV1-9	None	IGHJ4	CAIYYGTYYAMDYW	ko	27	1.45946	1642	88.7568	634	34.2703
1389	clonotype388	IGH	IGHM	Hc	IGHV2-2	None	IGHJ2	CARVTTVDLYFDYW	ko	48	2.59459	1642	88.7568	498	26.9189
1390	clonotype390	IGH	IGHM	Hc	IGHV1-62-2	None	IGHJ2	CARHEVRVPYYGSSRSLDYW	ko	16	0.864865	1642	88.7568	498	26.9189
1391	clonotype391	IGH	IGHM	Hc	IGHV8-12	None	IGHJ1	CARRGQFITTEGYFDVW	ko	38	2.05405	1642	88.7568	270	14.5946
1392	clonotype393	IGH	IGHM	Hc	IGHV13-2	None	IGHJ1	CSREGGSSYDWYFDVW	ko	18	0.972973	1642	88.7568	270	14.5946
1393	clonotype394	IGH	IGHM	Hc	IGHV5-16	None	IGHJ1	CARDGRITTVDWYFDVW	ko	29	1.56757	1642	88.7568	270	14.5946
1394	clonotype395	IGH	IGHM	Hc	IGHV9-3	None	IGHJ4	CARDGSSYAMDYW	ko	89	4.81081	1642	88.7568	634	34.2703
1395	clonotype396	IGH	IGHM	Hc	IGHV3-6	None	IGHJ4	CARDGTGAMDYW	ko	135	7.2973	1642	88.7568	634	34.2703
1396	clonotype397	IGH	IGHM	Hc	IGHV1-18	None	IGHJ3	CARTYYYGSSPFAYW	ko	47	2.54054	1642	88.7568	448	24.2162
1397	clonotype398	IGH	IGHM	Hc	IGHV1-72	None	IGHJ2	CARGSSYFDYW	ko	21	1.13514	1642	88.7568	498	26.9189
1398	clonotype399	IGH	IGHM	Hc	IGHV8-8	None	IGHJ4	CARIKGNYYGSSWDAMDYW	ko	78	4.21622	1642	88.7568	634	34.2703
1399	clonotype400	IGH	IGHM	Hc	IGHV3-6	None	IGHJ3	CAREKGYDYDRAPWFAYW	ko	135	7.2973	1642	88.7568	448	24.2162
1400	clonotype401	IGH	None	Hc	IGHV9-3	None	IGHJ3	CARGGDGSSYFAWFAYW	ko	89	4.81081	1642	88.7568	448	24.2162
1401	clonotype403	IGH	IGHM	Hc	IGHV8-8	IGHD1-1	IGHJ1	CARINIYYYGSSYDWYFDVW	ko	78	4.21622	150	8.10811	270	14.5946
1402	clonotype405	IGH	IGHM	Hc	IGHV1-82	None	IGHJ3	CARGEGLRQEAWFAYW	ko	21	1.13514	1642	88.7568	448	24.2162
1403	clonotype406	IGH	IGHM	Hc	IGHV2-2	None	IGHJ4	CARKGVYDYEGVDYW	ko	48	2.59459	1642	88.7568	634	34.2703
1404	clonotype407	IGH	IGHM	Hc	IGHV1-15	IGHD1-1	IGHJ2	CTRPSYYYGSSYENYW	ko	15	0.810811	150	8.10811	498	26.9189
1405	clonotype408	IGH	None	Hc	IGHV1-9	IGHD2-4	IGHJ1	CALYYDYDLYFDVW	ko	27	1.45946	18	0.972973	270	14.5946
1406	clonotype410	IGH	IGHM	Hc	IGHV1-26	None	IGHJ4	CARGYGSSLYAMDYW	ko	130	7.02703	1642	88.7568	634	34.2703
1407	clonotype411	IGH	IGHM	Hc	IGHV1-26	IGHD1-1	IGHJ4	CARRIYYGSSYYAMDYW	ko	130	7.02703	150	8.10811	634	34.2703
1408	clonotype412	IGH	IGHM	Hc	IGHV1-71	None	IGHJ2	CARHEALYDYDGYYFDYW	ko	11	0.594595	1642	88.7568	498	26.9189
1409	clonotype415	IGH	IGHM	Hc	IGHV9-3	None	IGHJ1	CARNSNYLSYWYFDVW	ko	89	4.81081	1642	88.7568	270	14.5946
1410	clonotype417	IGH	IGHM	Hc	IGHV1-26	None	IGHJ4	CARLHYYAMDYW	ko	130	7.02703	1642	88.7568	634	34.2703
1411	clonotype418	IGH	IGHM	Hc	IGHV14-3	None	IGHJ3	CARGDDSFAYW	ko	7	0.378378	1642	88.7568	448	24.2162
1412	clonotype419	IGH	IGHM	Hc	IGHV1-22	None	IGHJ1	CATDWYFDVW	ko	38	2.05405	1642	88.7568	270	14.5946
1413	clonotype420	IGH	IGHM	Hc	IGHV1-12	None	IGHJ1	CARDGDFDVW	ko	12	0.648649	1642	88.7568	270	14.5946
1414	clonotype422	IGH	IGHM	Hc	IGHV1-12	None	IGHJ4	CARWDTTVGMDYW	ko	12	0.648649	1642	88.7568	634	34.2703
1415	clonotype423	IGH	IGHM	Hc	IGHV1-53	None	IGHJ4	CARKGFPYYAMDYW	ko	29	1.56757	1642	88.7568	634	34.2703
1416	clonotype424	IGH	IGHM	Hc	IGHV3-6	None	IGHJ2	CARDTTVVAPLFDYW	ko	135	7.2973	1642	88.7568	498	26.9189
1417	clonotype425	IGH	IGHM	Hc	IGHV7-3	None	IGHJ2	CARYLYYLNYG	ko	27	1.45946	1642	88.7568	498	26.9189
1418	clonotype427	IGH	IGHM	Hc	IGHV6-3	None	IGHJ3	CTGDYRGFAYW	ko	82	4.43243	1642	88.7568	448	24.2162
1419	clonotype428	IGH	IGHM	Hc	IGHV9-3	None	IGHJ1	CARSSFGTYWYFDVW	ko	89	4.81081	1642	88.7568	270	14.5946
1420	clonotype429	IGH	IGHM	Hc	IGHV2-2	None	IGHJ4	CATYRSYAMDYW	ko	48	2.59459	1642	88.7568	634	34.2703
1421	clonotype430	IGH	IGHM	Hc	IGHV1-26	None	IGHJ3	CARSLYDYDPAWFAYW	ko	130	7.02703	1642	88.7568	448	24.2162
1422	clonotype431	IGH	None	Hc	IGHV3-1	None	IGHJ2	CARRGGDLPYYFDYW	ko	21	1.13514	1642	88.7568	498	26.9189
1423	clonotype433	IGH	IGHG2B	Hc	IGHV10-1	None	IGHJ4	CVRQGPYVMDYW	ko	27	1.45946	1642	88.7568	634	34.2703
1424	clonotype434	IGH	IGHM	Hc	IGHV1-18	None	IGHJ4	CARGGYYAMDYW	ko	47	2.54054	1642	88.7568	634	34.2703
1425	clonotype435	IGH	IGHM	Hc	IGHV1-78	None	IGHJ4	CARSGYYGSSYYAMDYW	ko	26	1.40541	1642	88.7568	634	34.2703
1426	clonotype437	IGH	IGHM	Hc	IGHV1-63	IGHD1-1	IGHJ1	CARRITTVVATNDWYFDVW	ko	7	0.378378	150	8.10811	270	14.5946
1427	clonotype438	IGH	IGHM	Hc	IGHV9-3	None	IGHJ2	CATPNWGRSYYFDYW	ko	89	4.81081	1642	88.7568	498	26.9189
1428	clonotype439	IGH	IGHM	Hc	IGHV1-64	None	IGHJ4	CARDDGGVHAMDYW	ko	36	1.94595	1642	88.7568	634	34.2703
1429	clonotype440	IGH	IGHM	Hc	IGHV9-1	None	IGHJ2	CATGSRYFDYW	ko	18	0.972973	1642	88.7568	498	26.9189
1430	clonotype441	IGH	IGHM	Hc	IGHV1-75	None	IGHJ4	CARNGSSPYYYAMDYW	ko	36	1.94595	1642	88.7568	634	34.2703
1431	clonotype442	IGH	IGHM	Hc	IGHV1-26	None	IGHJ2	CARWLLRDYFDYW	ko	130	7.02703	1642	88.7568	498	26.9189
1432	clonotype443	IGH	IGHM	Hc	IGHV1-64	None	IGHJ4	CASSSPYAMDYW	ko	36	1.94595	1642	88.7568	634	34.2703
1433	clonotype444	IGH	IGHD	Hc	IGHV4-1	None	IGHJ2	CASRGTYYFDYW	ko	41	2.21622	1642	88.7568	498	26.9189
1434	clonotype446	IGH	IGHM	Hc	IGHV3-6	IGHD1-1	IGHJ4	CARGLNYYGSSYDAMDYW	ko	135	7.2973	150	8.10811	634	34.2703
1435	clonotype447	IGH	IGHM	Hc	IGHV1-69	None	IGHJ2	CARVSYDYW	ko	15	0.810811	1642	88.7568	498	26.9189
1436	clonotype448	IGH	IGHM	Hc	IGHV6-3	None	IGHJ2	CTISSNYW	ko	82	4.43243	1642	88.7568	498	26.9189
1437	clonotype450	IGH	IGHM	Hc	IGHV6-3	None	IGHJ4	CQAGGYYAMDYW	ko	82	4.43243	1642	88.7568	634	34.2703
1438	clonotype452	IGH	IGHM	Hc	IGHV3-6	None	IGHJ1	CARDYSNWYFDVW	ko	135	7.2973	1642	88.7568	270	14.5946
1439	clonotype453	IGH	IGHM	Hc	IGHV6-6	None	IGHJ4	CTRLYAMDYW	ko	25	1.35135	1642	88.7568	634	34.2703
1440	clonotype454	IGH	IGHM	Hc	IGHV8-8	None	IGHJ1	CARIDRGIYYGSPHWYFDVW	ko	78	4.21622	1642	88.7568	270	14.5946
1441	clonotype455	IGH	IGHM	Hc	IGHV1-75	IGHD1-1	IGHJ2	CARSITTVVARVFQYYFDYW	ko	36	1.94595	150	8.10811	498	26.9189
1442	clonotype456	IGH	IGHM	Hc	IGHV1-19	None	IGHJ1	CARSDYGSLNYWYFDVW	ko	49	2.64865	1642	88.7568	270	14.5946
1443	clonotype457	IGH	IGHM	Hc	IGHV7-3	IGHD2-8	IGHJ1	CARYFSPMIYYGNYEDWYFDVW	ko	27	1.45946	5	0.27027	270	14.5946
1444	clonotype458	IGH	IGHM	Hc	IGHV1-39	None	IGHJ1	CARWRNYYGRDRYFDVW	ko	39	2.10811	1642	88.7568	270	14.5946
1445	clonotype459	IGH	IGHM	Hc	IGHV4-1	None	IGHJ3	CARPEGLRLFAYW	ko	41	2.21622	1642	88.7568	448	24.2162
1446	clonotype460	IGH	IGHM	Hc	IGHV1-64	IGHD1-1	IGHJ3	CASDYYGSSFAWFAYW	ko	36	1.94595	150	8.10811	448	24.2162
1447	clonotype462	IGH	IGHM	Hc	IGHV1-64	None	IGHJ2	CARYYYGLW	ko	36	1.94595	1642	88.7568	498	26.9189
1448	clonotype463	IGH	IGHM	Hc	IGHV1-62-2	None	IGHJ4	CARHEDVSYGSSYSDAMDYW	ko	16	0.864865	1642	88.7568	634	34.2703
1449	clonotype464	IGH	IGHM	Hc	IGHV1-9	None	IGHJ2	CARGWLPLYFDYW	ko	27	1.45946	1642	88.7568	498	26.9189
1450	clonotype465	IGH	IGHM	Hc	IGHV8-12	None	IGHJ4	CARRDPLYYAMDYW	ko	38	2.05405	1642	88.7568	634	34.2703
1451	clonotype466	IGH	IGHM	Hc	IGHV5-17	None	IGHJ4	CAIPDGSHAMDYW	ko	17	0.918919	1642	88.7568	634	34.2703
1452	clonotype467	IGH	IGHM	Hc	IGHV2-5	None	IGHJ3	CAKVGFAYW	ko	16	0.864865	1642	88.7568	448	24.2162
1453	clonotype468	IGH	IGHM	Hc	IGHV1-53	None	IGHJ1	CALSTVPYWYFDVW	ko	29	1.56757	1642	88.7568	270	14.5946
1454	clonotype469	IGH	IGHM	Hc	IGHV1-69	IGHD1-1	IGHJ4	CAREGGYYYGSRYAMDYW	ko	15	0.810811	150	8.10811	634	34.2703
1455	clonotype470	IGH	None	Hc	IGHV7-1	None	IGHJ1	CARDGRGWGYFDVW	ko	22	1.18919	1642	88.7568	270	14.5946
1456	clonotype472	IGH	IGHM	Hc	IGHV1-55	None	IGHJ4	CARNWDDAMDYW	ko	14	0.756757	1642	88.7568	634	34.2703
1457	clonotype473	IGH	IGHM	Hc	IGHV5-6	None	IGHJ3	CARHSDYDVGVAYW	ko	19	1.02703	1642	88.7568	448	24.2162
1458	clonotype475	IGH	IGHM	Hc	IGHV3-6	None	IGHJ4	CANWVYAMDYW	ko	135	7.2973	1642	88.7568	634	34.2703
1459	clonotype477	IGH	IGHM	Hc	IGHV1-19	None	IGHJ1	CARGEDYGNYLWYFDVW	ko	49	2.64865	1642	88.7568	270	14.5946
1460	clonotype478	IGH	IGHM	Hc	IGHV3-6	None	IGHJ3	CARALGAWFAYW	ko	135	7.2973	1642	88.7568	448	24.2162
1461	clonotype481	IGH	IGHM	Hc	IGHV3-6	None	IGHJ3	CARDRDGSLFAYW	ko	135	7.2973	1642	88.7568	448	24.2162
1462	clonotype482	IGH	IGHM	Hc	IGHV5-6	None	IGHJ4	CARQGGGAMDYW	ko	19	1.02703	1642	88.7568	634	34.2703
1463	clonotype483	IGH	IGHM	Hc	IGHV2-9-1	None	IGHJ1	CARNGYGNYFYWYFDVW	ko	21	1.13514	1642	88.7568	270	14.5946
1464	clonotype484	IGH	IGHM	Hc	IGHV1-82	None	IGHJ4	CARERVYYGKKGYAMDYW	ko	21	1.13514	1642	88.7568	634	34.2703
1465	clonotype485	IGH	IGHM	Hc	IGHV1-9	None	IGHJ4	CARGSYYGSIQYYYAMDYW	ko	27	1.45946	1642	88.7568	634	34.2703
1466	clonotype486	IGH	IGHM	Hc	IGHV1-85	None	IGHJ3	CARLAIYYGNVAWFAYW	ko	9	0.486486	1642	88.7568	448	24.2162
1467	clonotype487	IGH	None	Hc	IGHV2-3	None	IGHJ1	CAKEWDDYWYFDVW	ko	16	0.864865	1642	88.7568	270	14.5946
1468	clonotype488	IGH	IGHM	Hc	IGHV3-6	None	IGHJ4	CARESLGAMDYW	ko	135	7.2973	1642	88.7568	634	34.2703
1469	clonotype489	IGH	IGHM	Hc	IGHV10-1	IGHD1-1	IGHJ1	CVRQEDYYGSSYDWYFDVW	ko	27	1.45946	150	8.10811	270	14.5946
1470	clonotype492	IGH	IGHM	Hc	IGHV3-3	None	IGHJ4	CARDYGVGAMDYW	ko	5	0.27027	1642	88.7568	634	34.2703
1471	clonotype493	IGH	IGHM	Hc	IGHV1-58	None	IGHJ4	CARALPYYAMDYW	ko	15	0.810811	1642	88.7568	634	34.2703
1472	clonotype494	IGH	IGHM	Hc	IGHV1-26	None	IGHJ4	CARGEGWLLPYAMDYW	ko	130	7.02703	1642	88.7568	634	34.2703
1473	clonotype495	IGH	None	Hc	IGHV1-80	None	IGHJ3	CARSSQLPWFAYW	ko	14	0.756757	1642	88.7568	448	24.2162
1474	clonotype497	IGH	IGHM	Hc	IGHV2-5	None	IGHJ4	CARAYDGYYFYAMDYW	ko	16	0.864865	1642	88.7568	634	34.2703
1475	clonotype498	IGH	IGHM	Hc	IGHV2-3	None	IGHJ4	CANLGGAMDYW	ko	16	0.864865	1642	88.7568	634	34.2703
1476	clonotype499	IGH	IGHM	Hc	IGHV13-2	None	IGHJ4	CSRDYGSSSAMDYW	ko	18	0.972973	1642	88.7568	634	34.2703
1477	clonotype500	IGH	IGHM	Hc	IGHV1-26	None	IGHJ4	CARSRYYGSRDYAMDYW	ko	130	7.02703	1642	88.7568	634	34.2703
1478	clonotype502	IGH	None	Hc	IGHV2-9-1	None	IGHJ4	CARERAMDYW	ko	21	1.13514	1642	88.7568	634	34.2703
1479	clonotype504	IGH	IGHM	Hc	IGHV2-2	None	IGHJ4	CARKGNFYYGSRGYYYAMDYW	ko	48	2.59459	1642	88.7568	634	34.2703
1480	clonotype505	IGH	IGHM	Hc	IGHV2-2	None	IGHJ3	CARKKDYSNYGFAYW	ko	48	2.59459	1642	88.7568	448	24.2162
1481	clonotype506	IGH	IGHM	Hc	IGHV3-5	None	IGHJ2	CARSYYYASFDYW	ko	4	0.216216	1642	88.7568	498	26.9189
1482	clonotype507	IGH	IGHM	Hc	IGHV9-3	None	IGHJ2	CASGTYYYGSSLFDYW	ko	89	4.81081	1642	88.7568	498	26.9189
1483	clonotype508	IGH	IGHM	Hc	IGHV1-26	None	IGHJ4	CARGYYSLYYYAMDYW	ko	130	7.02703	1642	88.7568	634	34.2703
1484	clonotype511	IGH	IGHM	Hc	IGHV14-2	None	IGHJ2	CASYYSYFDYW	ko	14	0.756757	1642	88.7568	498	26.9189
1485	clonotype512	IGH	IGHM	Hc	IGHV9-3	None	IGHJ2	CARRSPYGSFDYW	ko	89	4.81081	1642	88.7568	498	26.9189
1486	clonotype514	IGH	IGHM	Hc	IGHV1-80	None	IGHJ4	CARYRYYAMDYW	ko	14	0.756757	1642	88.7568	634	34.2703
1487	clonotype515	IGH	IGHM	Hc	IGHV1-5	None	IGHJ2	CTTHYYGSIPFDYW	ko	31	1.67568	1642	88.7568	498	26.9189
1488	clonotype517	IGH	IGHM	Hc	IGHV2-6	None	IGHJ1	CARHGGSWLLPYFDVW	ko	12	0.648649	1642	88.7568	270	14.5946
1489	clonotype518	IGH	IGHM	Hc	IGHV11-2	IGHD3-2	IGHJ3	CISLDSSGYWFAYW	ko	2	0.108108	9	0.486486	448	24.2162
1490	clonotype519	IGH	IGHM	Hc	IGHV13-2	None	IGHJ4	CSRGAMDYW	ko	18	0.972973	1642	88.7568	634	34.2703
1491	clonotype521	IGH	IGHM	Hc	IGHV9-2	None	IGHJ2	CAREITTVPNYFDYW	ko	9	0.486486	1642	88.7568	498	26.9189
1492	clonotype522	IGH	IGHM	Hc	IGHV3-6	None	IGHJ3	CARDTTVVAPGFAYW	ko	135	7.2973	1642	88.7568	448	24.2162
1493	clonotype523	IGH	IGHM	Hc	IGHV1-12	None	IGHJ4	CARVNYYAMDYW	ko	12	0.648649	1642	88.7568	634	34.2703
1494	clonotype524	IGH	IGHM	Hc	IGHV1-64	None	IGHJ3	CARYGGYGYDFSWFAYW	ko	36	1.94595	1642	88.7568	448	24.2162
1495	clonotype525	IGH	IGHM	Hc	IGHV1-26	None	IGHJ1	CARFSRGYFDVW	ko	130	7.02703	1642	88.7568	270	14.5946
1496	clonotype526	IGH	IGHM	Hc	IGHV10-3	None	IGHJ4	CVTLDGYYAMDYW	ko	33	1.78378	1642	88.7568	634	34.2703
1497	clonotype527	IGH	IGHM	Hc	IGHV1-58	None	IGHJ1	CASITTDWYFDVW	ko	15	0.810811	1642	88.7568	270	14.5946
1498	clonotype528	IGH	IGHM	Hc	IGHV1-62-2	None	IGHJ1	CARHEEYYSNAYWYFDVW	ko	16	0.864865	1642	88.7568	270	14.5946
1499	clonotype529	IGH	None	Hc	IGHV4-1	None	IGHJ4	CARLRYGNPRMAMDYW	ko	41	2.21622	1642	88.7568	634	34.2703
1500	clonotype531	IGH	IGHM	Hc	IGHV8-12	None	IGHJ1	CARRGGTGTTYFDVW	ko	38	2.05405	1642	88.7568	270	14.5946
1501	clonotype532	IGH	IGHM	Hc	IGHV2-3	None	IGHJ4	CAKIFFITTVVRNYAMDYW	ko	16	0.864865	1642	88.7568	634	34.2703
1502	clonotype533	IGH	IGHM	Hc	IGHV1-42	IGHD2-5	IGHJ3	CAPYYSNYVEFAYW	ko	15	0.810811	12	0.648649	448	24.2162
1503	clonotype534	IGH	IGHM	Hc	IGHV3-6	None	IGHJ4	CAKGSAMDYW	ko	135	7.2973	1642	88.7568	634	34.2703
1504	clonotype535	IGH	IGHM	Hc	IGHV14-4	None	IGHJ2	CTTSTVVATKDYW	ko	24	1.2973	1642	88.7568	498	26.9189
1505	clonotype537	IGH	IGHM	Hc	IGHV1-78	None	IGHJ3	CATLDSSGLFAYW	ko	26	1.40541	1642	88.7568	448	24.2162
1506	clonotype538	IGH	IGHM	Hc	IGHV1-69	None	IGHJ1	CARSLLRFRYFDVW	ko	15	0.810811	1642	88.7568	270	14.5946
1507	clonotype539	IGH	IGHM	Hc	IGHV1-39	None	IGHJ1	CARSWIAHWYFDVW	ko	39	2.10811	1642	88.7568	270	14.5946
1508	clonotype540	IGH	IGHM	Hc	IGHV1-59	None	IGHJ1	CVGYYDYDWYFDVW	ko	6	0.324324	1642	88.7568	270	14.5946
1509	clonotype541	IGH	IGHM	Hc	IGHV1-53	None	IGHJ2	CARGIYFFDYW	ko	29	1.56757	1642	88.7568	498	26.9189
1510	clonotype543	IGH	IGHM	Hc	IGHV1-69	None	IGHJ2	CARWGIVVFDYW	ko	15	0.810811	1642	88.7568	498	26.9189
1511	clonotype544	IGH	IGHM	Hc	IGHV10-1	None	IGHJ1	CVRQLRPHWYFDVW	ko	27	1.45946	1642	88.7568	270	14.5946
1512	clonotype546	IGH	IGHM	Hc	IGHV3-6	None	IGHJ2	CAREDYGYYFDYW	ko	135	7.2973	1642	88.7568	498	26.9189
1513	clonotype548	IGH	IGHM	Hc	IGHV1-59	None	IGHJ4	CARWGTVRDYAMDYW	ko	6	0.324324	1642	88.7568	634	34.2703
1514	clonotype549	IGH	IGHM	Hc	IGHV6-3	None	IGHJ2	CTGTVVARNDYW	ko	82	4.43243	1642	88.7568	498	26.9189
1515	clonotype550	IGH	IGHM	Hc	IGHV5-12	None	IGHJ3	CARPGGYNLAWFAYW	ko	10	0.540541	1642	88.7568	448	24.2162
1516	clonotype551	IGH	IGHM	Hc	IGHV1-58	None	IGHJ4	CARSYDGYYLYYAMDYW	ko	15	0.810811	1642	88.7568	634	34.2703
1517	clonotype553	IGH	IGHM	Hc	IGHV3-6	None	IGHJ3	CAREKTTVGAYW	ko	135	7.2973	1642	88.7568	448	24.2162
1518	clonotype554	IGH	IGHM	Hc	IGHV2-9-1	None	IGHJ2	CARNPDGNYVYFDYW	ko	21	1.13514	1642	88.7568	498	26.9189
1519	clonotype555	IGH	IGHM	Hc	IGHV10-1	None	IGHJ4	CVSLLLGPDYAMDYW	ko	27	1.45946	1642	88.7568	634	34.2703
1520	clonotype557	IGH	IGHM	Hc	IGHV1-26	None	IGHJ4	CARYNGYYVDYYAMDYW	ko	130	7.02703	1642	88.7568	634	34.2703
1521	clonotype558	IGH	None	Hc	IGHV1-26	None	IGHJ4	CASPLLPRGAMDYW	ko	130	7.02703	1642	88.7568	634	34.2703
1522	clonotype559	IGH	IGHM	Hc	IGHV9-2	None	IGHJ2	CARSPKWLLSLDYW	ko	9	0.486486	1642	88.7568	498	26.9189
1523	clonotype560	IGH	IGHM	Hc	IGHV2-2	None	IGHJ2	CARNYYSNYFDYW	ko	48	2.59459	1642	88.7568	498	26.9189
1524	clonotype561	IGH	IGHM	Hc	IGHV1-64	None	IGHJ4	CAREVYDYDDAMDYW	ko	36	1.94595	1642	88.7568	634	34.2703
1525	clonotype562	IGH	IGHM	Hc	IGHV5-12	IGHD1-1	IGHJ1	CASAPDYYGSSYGGFYWYFDVW	ko	10	0.540541	150	8.10811	270	14.5946
1526	clonotype564	IGH	None	Hc	IGHV1-31	None	IGHJ2	CAREIRNGSRYYFDYW	ko	4	0.216216	1642	88.7568	498	26.9189
1527	clonotype565	IGH	IGHM	Hc	IGHV1-69	None	IGHJ3	CARNDYDVIAYW	ko	15	0.810811	1642	88.7568	448	24.2162
1528	clonotype566	IGH	IGHM	Hc	IGHV14-2	None	IGHJ4	CARSGGSSYRAMDYW	ko	14	0.756757	1642	88.7568	634	34.2703
1529	clonotype568	IGH	IGHM	Hc	IGHV1-5	None	IGHJ3	CARDYDYVRAWFAYW	ko	31	1.67568	1642	88.7568	448	24.2162
1530	clonotype570	IGH	IGHM	Hc	IGHV9-3	None	IGHJ2	CAREDDGYYPFDYW	ko	89	4.81081	1642	88.7568	498	26.9189
1531	clonotype571	IGH	IGHM	Hc	IGHV10-3	None	IGHJ3	CVRAMGLYDGYSFAYW	ko	33	1.78378	1642	88.7568	448	24.2162
1532	clonotype573	IGH	IGHM	Hc	IGHV1-19	IGHD1-1	IGHJ3	CARGNYYGSSYGFAYW	ko	49	2.64865	150	8.10811	448	24.2162
1533	clonotype575	IGH	IGHM	Hc	IGHV9-3	None	IGHJ4	CARWLLRDYAMDYW	ko	89	4.81081	1642	88.7568	634	34.2703
1534	clonotype578	IGH	IGHM	Hc	IGHV5-16	None	IGHJ2	CARGWLPDYW	ko	29	1.56757	1642	88.7568	498	26.9189
1535	clonotype579	IGH	IGHM	Hc	IGHV1-42	None	IGHJ1	CARGNYGSTYWYFDVW	ko	15	0.810811	1642	88.7568	270	14.5946
1536	clonotype580	IGH	IGHM	Hc	IGHV6-3	None	IGHJ3	CTGGGTWFAYW	ko	82	4.43243	1642	88.7568	448	24.2162
1537	clonotype583	IGH	IGHM	Hc	IGHV1-39	None	IGHJ4	CARSGYYGSSYENAMDYW	ko	39	2.10811	1642	88.7568	634	34.2703
1538	clonotype584	IGH	IGHM	Hc	IGHV5-6	None	IGHJ3	CARPFISTPAWFACW	ko	19	1.02703	1642	88.7568	448	24.2162
1539	clonotype585	IGH	IGHM	Hc	IGHV8-8	None	IGHJ1	CARMRALRRGYFDVW	ko	78	4.21622	1642	88.7568	270	14.5946
1540	clonotype587	IGH	IGHM	Hc	IGHV1-5	None	IGHJ3	CTREGWLLAWFAYW	ko	31	1.67568	1642	88.7568	448	24.2162
1541	clonotype588	IGH	IGHM	Hc	IGHV5-4	None	IGHJ2	CARGRDYGSYYFDYW	ko	23	1.24324	1642	88.7568	498	26.9189
1542	clonotype590	IGH	None	Hc	IGHV8-12	IGHD1-1	IGHJ4	CARSGFITTVVAEAMDYW	ko	38	2.05405	150	8.10811	634	34.2703
1543	clonotype591	IGH	IGHM	Hc	IGHV3-6	None	IGHJ2	CARASRSTHFDYW	ko	135	7.2973	1642	88.7568	498	26.9189
1544	clonotype592	IGH	IGHM	Hc	IGHV1-26	None	IGHJ2	CAKTYYFDYW	ko	130	7.02703	1642	88.7568	498	26.9189
1545	clonotype593	IGH	IGHM	Hc	IGHV1-26	IGHD1-1	IGHJ2	CARESFITTVVAPYYFDYW	ko	130	7.02703	150	8.10811	498	26.9189
1546	clonotype594	IGH	IGHM	Hc	IGHV1-19	None	IGHJ4	CAREEGDPLDAMDYW	ko	49	2.64865	1642	88.7568	634	34.2703
1547	clonotype595	IGH	IGHM	Hc	IGHV1-84	None	IGHJ2	CARGVYW	ko	10	0.540541	1642	88.7568	498	26.9189
1548	clonotype596	IGH	IGHM	Hc	IGHV7-1	None	IGHJ4	CARDGYYDAMDYW	ko	22	1.18919	1642	88.7568	634	34.2703
1549	clonotype597	IGH	IGHM	Hc	IGHV1-56	None	IGHJ2	CARGSSGYGPFDYW	ko	1	0.0540541	1642	88.7568	498	26.9189
1550	clonotype598	IGH	IGHM	Hc	IGHV1-12	None	IGHJ2	CARGDYDEGDYFDYW	ko	12	0.648649	1642	88.7568	498	26.9189
1551	clonotype599	IGH	IGHM	Hc	IGHV1-9	IGHD1-1	IGHJ1	CASEITTVVAPYWYFDVW	ko	27	1.45946	150	8.10811	270	14.5946
1552	clonotype600	IGH	IGHM	Hc	IGHV1-18	None	IGHJ4	CARRGGAMDYW	ko	47	2.54054	1642	88.7568	634	34.2703
1553	clonotype601	IGH	IGHM	Hc	IGHV3-1	None	IGHJ4	CARRGRIYYYGSYYAMDYW	ko	21	1.13514	1642	88.7568	634	34.2703
1554	clonotype602	IGH	IGHM	Hc	IGHV5-6	None	IGHJ4	CARQGLPEAMDYW	ko	19	1.02703	1642	88.7568	634	34.2703
1555	clonotype604	IGH	IGHM	Hc	IGHV5-12	None	IGHJ4	CARSPYYFAMDYW	ko	10	0.540541	1642	88.7568	634	34.2703
1556	clonotype605	IGH	IGHM	Hc	IGHV1-19	None	IGHJ3	CANYYGSSPWFAYW	ko	49	2.64865	1642	88.7568	448	24.2162
1557	clonotype607	IGH	IGHM	Hc	IGHV3-6	None	IGHJ3	CARDDYDRVAYW	ko	135	7.2973	1642	88.7568	448	24.2162
1558	clonotype609	IGH	IGHM	Hc	IGHV7-3	None	IGHJ2	CARSLYGSSYLSYFDYW	ko	27	1.45946	1642	88.7568	498	26.9189
1559	clonotype610	IGH	IGHM	Hc	IGHV1-19	IGHD1-1	IGHJ2	CANGLITTVVATRYFDYW	ko	49	2.64865	150	8.10811	498	26.9189
1560	clonotype612	IGH	None	Hc	IGHV1-74	None	IGHJ4	CAKIYYGYEGAMDYW	ko	13	0.702703	1642	88.7568	634	34.2703
1561	clonotype613	IGH	IGHM	Hc	IGHV2-9-1	IGHD2-8	IGHJ4	CAIIYYGNYDAMDYW	ko	21	1.13514	5	0.27027	634	34.2703
1562	clonotype614	IGH	IGHM	Hc	IGHV5-9	None	IGHJ2	CARHELGDYFDYW	ko	7	0.378378	1642	88.7568	498	26.9189
1563	clonotype615	IGH	IGHM	Hc	IGHV2-2	IGHD1-1	IGHJ4	CARDYYGSSSYAMDYW	ko	48	2.59459	150	8.10811	634	34.2703
1564	clonotype616	IGH	IGHM	Hc	IGHV2-5	None	IGHJ1	CAKNRGYYWYFDVW	ko	16	0.864865	1642	88.7568	270	14.5946
1565	clonotype618	IGH	IGHM	Hc	IGHV8-8	None	IGHJ3	CARIEAHFAYW	ko	78	4.21622	1642	88.7568	448	24.2162
1566	clonotype619	IGH	IGHM	Hc	IGHV9-3	None	IGHJ2	CARSGYYGSSYFDYW	ko	89	4.81081	1642	88.7568	498	26.9189
1567	clonotype620	IGH	IGHM	Hc	IGHV1-9	None	IGHJ3	CARGGYDYDGGFAYW	ko	27	1.45946	1642	88.7568	448	24.2162
1568	clonotype621	IGH	IGHM	Hc	IGHV1-18	None	IGHJ4	CARSAQATYAMDYW	ko	47	2.54054	1642	88.7568	634	34.2703
1569	clonotype623	IGH	IGHM	Hc	IGHV5-4	None	IGHJ4	CARDHDYPYYYAMDYW	ko	23	1.24324	1642	88.7568	634	34.2703
1570	clonotype626	IGH	IGHM	Hc	IGHV1-82	None	IGHJ3	CARYNGHGGFAYW	ko	21	1.13514	1642	88.7568	448	24.2162
1571	clonotype627	IGH	IGHM	Hc	IGHV8-8	None	IGHJ4	CARIDYYGSSPLAMDYW	ko	78	4.21622	1642	88.7568	634	34.2703
1572	clonotype628	IGH	IGHM	Hc	IGHV5-17	None	IGHJ2	CANLPRGYW	ko	17	0.918919	1642	88.7568	498	26.9189
1573	clonotype629	IGH	IGHM	Hc	IGHV8-8	None	IGHJ1	CARIVYGSSPSYWYFDVW	ko	78	4.21622	1642	88.7568	270	14.5946
1574	clonotype631	IGH	IGHM	Hc	IGHV1-72	None	IGHJ1	CARSTVVARSYWYFDVW	ko	21	1.13514	1642	88.7568	270	14.5946
1575	clonotype634	IGH	IGHM	Hc	IGHV4-1	IGHD2-3	IGHJ4	CASLYDGYYVFYAMDYW	ko	41	2.21622	7	0.378378	634	34.2703
1576	clonotype635	IGH	IGHM	Hc	IGHV1-75	None	IGHJ4	CAREGVLYDGYHPFSMDYW	ko	36	1.94595	1642	88.7568	634	34.2703
1577	clonotype636	IGH	IGHM	Hc	IGHV1-75	None	IGHJ2	CARWDYYGFDYW	ko	36	1.94595	1642	88.7568	498	26.9189
1578	clonotype637	IGH	IGHM	Hc	IGHV9-3	IGHD2-5	IGHJ2	CARSAYYSNYDVYLYYFDYW	ko	89	4.81081	12	0.648649	498	26.9189
1579	clonotype638	IGH	IGHM	Hc	IGHV6-3	None	IGHJ1	CTYYGSFYWYFDVW	ko	82	4.43243	1642	88.7568	270	14.5946
1580	clonotype639	IGH	IGHM	Hc	IGHV2-6	None	IGHJ4	CARDTGNAMDYW	ko	12	0.648649	1642	88.7568	634	34.2703
1581	clonotype641	IGH	IGHM	Hc	IGHV1-19	None	IGHJ2	CARGDIYDGYYFDYW	ko	49	2.64865	1642	88.7568	498	26.9189
1582	clonotype642	IGH	IGHM	Hc	IGHV1-64	None	IGHJ4	CARGDYGSSYAMDYW	ko	36	1.94595	1642	88.7568	634	34.2703
1583	clonotype643	IGH	IGHM	Hc	IGHV2-2	None	IGHJ4	CARNMITTSYAMDYW	ko	48	2.59459	1642	88.7568	634	34.2703
1584	clonotype647	IGH	IGHM	Hc	IGHV3-6	None	IGHJ2	CARVTTVVPFDYW	ko	135	7.2973	1642	88.7568	498	26.9189
1585	clonotype648	IGH	IGHM	Hc	IGHV7-1	None	IGHJ1	CARDAPTDGYYSYWYFDVW	ko	22	1.18919	1642	88.7568	270	14.5946
1586	clonotype650	IGH	IGHM	Hc	IGHV1-22	None	IGHJ3	CARSSYYW	ko	38	2.05405	1642	88.7568	448	24.2162
1587	clonotype651	IGH	IGHM	Hc	IGHV10-3	None	IGHJ4	CVRGPTVVANAMDYW	ko	33	1.78378	1642	88.7568	634	34.2703
1588	clonotype652	IGH	IGHM	Hc	IGHV1-20	None	IGHJ2	CARNYGSSYVLDYW	ko	7	0.378378	1642	88.7568	498	26.9189
1589	clonotype654	IGH	IGHM	Hc	IGHV1-72	None	IGHJ4	CAREAAPYAMDYW	ko	21	1.13514	1642	88.7568	634	34.2703
1590	clonotype655	IGH	None	Hc	IGHV1-75	None	IGHJ4	CARRGYLLLRDYYAMDYW	ko	36	1.94595	1642	88.7568	634	34.2703
1591	clonotype656	IGH	IGHM	Hc	IGHV10-1	IGHD1-1	IGHJ4	CVRHYYGSSYDYYAMDYW	ko	27	1.45946	150	8.10811	634	34.2703
1592	clonotype657	IGH	IGHM	Hc	IGHV6-6	None	IGHJ1	CTDYDGYFDVW	ko	25	1.35135	1642	88.7568	270	14.5946
1593	clonotype660	IGH	IGHM	Hc	IGHV8-12	None	IGHJ4	CARRSMDYDGGAYYAMDYW	ko	38	2.05405	1642	88.7568	634	34.2703
1594	clonotype662	IGH	IGHM	Hc	IGHV1-62-2	None	IGHJ3	CARHEEGLGSSPFAYW	ko	16	0.864865	1642	88.7568	448	24.2162
1595	clonotype665	IGH	IGHM	Hc	IGHV14-4	IGHD1-1	IGHJ1	CAIPYPPYYYGSSSWYFDVW	ko	24	1.2973	150	8.10811	270	14.5946
1596	clonotype666	IGH	IGHM	Hc	IGHV2-3	None	IGHJ4	CAKPQLRLRSYAMDYW	ko	16	0.864865	1642	88.7568	634	34.2703
1597	clonotype668	IGH	IGHM	Hc	IGHV3-6	None	IGHJ2	CARGDTTVVAPDYW	ko	135	7.2973	1642	88.7568	498	26.9189
1598	clonotype669	IGH	IGHM	Hc	IGHV5-9-1	None	IGHJ3	CTRADYGTLRGRFAYW	ko	12	0.648649	1642	88.7568	448	24.2162
1599	clonotype671	IGH	IGHM	Hc	IGHV8-12	None	IGHJ2	CARSRLPEYYFDYW	ko	38	2.05405	1642	88.7568	498	26.9189
1600	clonotype672	IGH	IGHM	Hc	IGHV1-74	None	IGHJ2	CARGNDYW	ko	13	0.702703	1642	88.7568	498	26.9189
1601	clonotype673	IGH	IGHM	Hc	IGHV6-3	None	IGHJ4	CTGLITTVVDYAMDYW	ko	82	4.43243	1642	88.7568	634	34.2703
1602	clonotype676	IGH	IGHM	Hc	IGHV2-2	None	IGHJ4	CARGPTIVNYYAMDYW	ko	48	2.59459	1642	88.7568	634	34.2703
1603	clonotype677	IGH	IGHM	Hc	IGHV1-5	IGHD1-1	IGHJ2	CTRGPYYYGSSYFDYW	ko	31	1.67568	150	8.10811	498	26.9189
1604	clonotype678	IGH	IGHM	Hc	IGHV1-64	None	IGHJ2	CAREEIYYYVKGDYW	ko	36	1.94595	1642	88.7568	498	26.9189
1605	clonotype679	IGH	IGHM	Hc	IGHV8-4	None	IGHJ2	CAHHYYGSSFDYW	ko	3	0.162162	1642	88.7568	498	26.9189
1606	clonotype680	IGH	None	Hc	IGHV2-9-1	None	IGHJ4	CARRGYGSSYCYAMDYW	ko	21	1.13514	1642	88.7568	634	34.2703
1607	clonotype681	IGH	IGHM	Hc	IGHV14-4	None	IGHJ3	CTTYLGLRYPPFAYW	ko	24	1.2973	1642	88.7568	448	24.2162
1608	clonotype683	IGH	IGHM	Hc	IGHV1-71	None	IGHJ2	CARHEDDGYSRTDFDYW	ko	11	0.594595	1642	88.7568	498	26.9189
1609	clonotype684	IGH	IGHM	Hc	IGHV2-5	None	IGHJ2	CAKQSTVVAYYFDYW	ko	16	0.864865	1642	88.7568	498	26.9189
1610	clonotype687	IGH	IGHM	Hc	IGHV1-39	IGHD1-1	IGHJ4	CARRENYYGSSYGAMDYW	ko	39	2.10811	150	8.10811	634	34.2703
1611	clonotype688	IGH	IGHM	Hc	IGHV1-26	None	IGHJ2	CAIGENGYYLFDYW	ko	130	7.02703	1642	88.7568	498	26.9189
1612	clonotype689	IGH	IGHM	Hc	IGHV1-78	None	IGHJ4	CARDYGSSYPYAMDYW	ko	26	1.40541	1642	88.7568	634	34.2703
1613	clonotype691	IGH	IGHM	Hc	IGHV1-75	None	IGHJ2	CARGGRDLRSPDYW	ko	36	1.94595	1642	88.7568	498	26.9189
1614	clonotype694	IGH	IGHM	Hc	IGHV1-76	None	IGHJ4	CAREGLAVDYW	ko	13	0.702703	1642	88.7568	634	34.2703
1615	clonotype695	IGH	IGHM	Hc	IGHV3-6	None	IGHJ4	CARDAMDYW	ko	135	7.2973	1642	88.7568	634	34.2703
1616	clonotype696	IGH	IGHM	Hc	IGHV1-9	None	IGHJ2	CARATVVDYLDYW	ko	27	1.45946	1642	88.7568	498	26.9189
1617	clonotype698	IGH	IGHM	Hc	IGHV5-2	None	IGHJ3	CARQTAQASFAYW	ko	4	0.216216	1642	88.7568	448	24.2162
1618	clonotype699	IGH	IGHM	Hc	IGHV1-18	None	IGHJ4	CARDLGYW	ko	47	2.54054	1642	88.7568	634	34.2703
1619	clonotype700	IGH	IGHM	Hc	IGHV1-81	None	IGHJ4	CARGGDGYHAMDYW	ko	39	2.10811	1642	88.7568	634	34.2703
1620	clonotype701	IGH	IGHD	Hc	IGHV1-18	None	IGHJ3	CAWAWFAYW	ko	47	2.54054	1642	88.7568	448	24.2162
1621	clonotype706	IGH	IGHM	Hc	IGHV6-3	None	IGHJ2	CTGGYDVLFDYW	ko	82	4.43243	1642	88.7568	498	26.9189
1622	clonotype707	IGH	IGHM	Hc	IGHV3-6	None	IGHJ3	CANYYGSSLPWFAYW	ko	135	7.2973	1642	88.7568	448	24.2162
1623	clonotype708	IGH	IGHM	Hc	IGHV3-6	None	IGHJ2	CARGGTTVVATPFDYW	ko	135	7.2973	1642	88.7568	498	26.9189
1624	clonotype709	IGH	IGHM	Hc	IGHV3-6	None	IGHJ2	CARVELHEGFDYW	ko	135	7.2973	1642	88.7568	498	26.9189
1625	clonotype711	IGH	IGHM	Hc	IGHV9-3	None	IGHJ4	CARKGVTTVYYYAMDYW	ko	89	4.81081	1642	88.7568	634	34.2703
1626	clonotype712	IGH	IGHM	Hc	IGHV3-6	None	IGHJ4	CASDYDGIYYAMDYW	ko	135	7.2973	1642	88.7568	634	34.2703
1627	clonotype713	IGH	IGHM	Hc	IGHV10-3	IGHD1-1	IGHJ4	CVREPYYYGSSEDAMDYW	ko	33	1.78378	150	8.10811	634	34.2703
1628	clonotype714	IGH	IGHM	Hc	IGHV1-19	IGHD1-1	IGHJ1	CAGGYYGSSYRYFDVW	ko	49	2.64865	150	8.10811	270	14.5946
1629	clonotype715	IGH	IGHM	Hc	IGHV1-72	None	IGHJ4	CARDLYAMDYW	ko	21	1.13514	1642	88.7568	634	34.2703
1630	clonotype716	IGH	IGHM	Hc	IGHV3-1	None	IGHJ2	CARARRLYFDYW	ko	21	1.13514	1642	88.7568	498	26.9189
1631	clonotype718	IGH	IGHM	Hc	IGHV1-58	None	IGHJ4	CARDGNYFMDYW	ko	15	0.810811	1642	88.7568	634	34.2703
1632	clonotype719	IGH	IGHM	Hc	IGHV1-69	None	IGHJ3	CARDYGSGAWFAYW	ko	15	0.810811	1642	88.7568	448	24.2162
1633	clonotype721	IGH	IGHM	Hc	IGHV6-3	None	IGHJ2	CTGTTVAFDYW	ko	82	4.43243	1642	88.7568	498	26.9189
1634	clonotype724	IGH	IGHM	Hc	IGHV5-6	None	IGHJ4	CARWVSYDYDTGDAMDYW	ko	19	1.02703	1642	88.7568	634	34.2703
1635	clonotype725	IGH	IGHM	Hc	IGHV1-5	None	IGHJ2	CTRSGYW	ko	31	1.67568	1642	88.7568	498	26.9189
1636	clonotype726	IGH	IGHM	Hc	IGHV3-1	None	IGHJ1	CARDYGYDWYFDVW	ko	21	1.13514	1642	88.7568	270	14.5946
1637	clonotype727	IGH	None	Hc	IGHV13-2	None	IGHJ1	CSREVQGYFDVW	ko	18	0.972973	1642	88.7568	270	14.5946
1638	clonotype728	IGH	IGHM	Hc	IGHV2-6	None	IGHJ1	CARHRDYGSSYWYFDVW	ko	12	0.648649	1642	88.7568	270	14.5946
1639	clonotype729	IGH	IGHM	Hc	IGHV1-26	IGHD1-1	IGHJ4	CARSGNYYYGSSYFCYAMDYW	ko	130	7.02703	150	8.10811	634	34.2703
1640	clonotype731	IGH	IGHM	Hc	IGHV14-4	None	IGHJ2	CTTVVPFDYW	ko	24	1.2973	1642	88.7568	498	26.9189
1641	clonotype732	IGH	IGHM	Hc	IGHV1-26	None	IGHJ2	CAREGLWSNSLFDYW	ko	130	7.02703	1642	88.7568	498	26.9189
1642	clonotype733	IGH	IGHM	Hc	IGHV1-63	None	IGHJ1	CARCWNGYYGYFDVW	ko	7	0.378378	1642	88.7568	270	14.5946
1643	clonotype734	IGH	IGHM	Hc	IGHV7-3	None	IGHJ4	CARYEGYSNYRAMDYW	ko	27	1.45946	1642	88.7568	634	34.2703
1644	clonotype735	IGH	IGHM	Hc	IGHV1-26	IGHD1-1	IGHJ2	CARSLYYYGSSYYFDYW	ko	130	7.02703	150	8.10811	498	26.9189
1645	clonotype736	IGH	IGHM	Hc	IGHV8-8	IGHD1-1	IGHJ2	CARIKVYYGSSYDYW	ko	78	4.21622	150	8.10811	498	26.9189
1646	clonotype737	IGH	IGHM	Hc	IGHV8-12	None	IGHJ4	CARRVGSRGAMDYW	ko	38	2.05405	1642	88.7568	634	34.2703
1647	clonotype738	IGH	IGHM	Hc	IGHV1-26	None	IGHJ4	CARVEPYGSSSYYYAMDYW	ko	130	7.02703	1642	88.7568	634	34.2703
1648	clonotype739	IGH	IGHM	Hc	IGHV8-8	None	IGHJ2	CARIAKGGNPFDYW	ko	78	4.21622	1642	88.7568	498	26.9189
1649	clonotype740	IGH	IGHM	Hc	IGHV10-3	None	IGHJ1	CVRDLGTVVERGYFDVW	ko	33	1.78378	1642	88.7568	270	14.5946
1650	clonotype741	IGH	IGHM	Hc	IGHV5-12	IGHD2-4	IGHJ3	CARGYIYYDYDVDWFAYW	ko	10	0.540541	18	0.972973	448	24.2162
1651	clonotype743	IGH	IGHM	Hc	IGHV3-6	None	IGHJ4	CARVGTTAVMDYW	ko	135	7.2973	1642	88.7568	634	34.2703
1652	clonotype744	IGH	IGHM	Hc	IGHV5-6	None	IGHJ2	CARHEGITTVVDYFDYW	ko	19	1.02703	1642	88.7568	498	26.9189
1653	clonotype745	IGH	IGHM	Hc	IGHV1-19	None	IGHJ3	CAREDYDYDPFAYW	ko	49	2.64865	1642	88.7568	448	24.2162
1654	clonotype746	IGH	IGHM	Hc	IGHV15-2	None	IGHJ3	CARGGLYYGSSSLAYW	ko	13	0.702703	1642	88.7568	448	24.2162
1655	clonotype747	IGH	IGHM	Hc	IGHV1-78	None	IGHJ3	CARIAYW	ko	26	1.40541	1642	88.7568	448	24.2162
1656	clonotype748	IGH	IGHM	Hc	IGHV3-6	None	IGHJ4	CARGSTVVATDYAMDYW	ko	135	7.2973	1642	88.7568	634	34.2703
1657	clonotype750	IGH	IGHM	Hc	IGHV1-36	None	IGHJ4	CAREDYYGSPFYAMDYW	ko	8	0.432432	1642	88.7568	634	34.2703
1658	clonotype751	IGH	IGHM	Hc	IGHV1-12	None	IGHJ2	CARDGLYYFDYW	ko	12	0.648649	1642	88.7568	498	26.9189
1659	clonotype752	IGH	IGHM	Hc	IGHV1-22	None	IGHJ4	CARGGGEGTPYYYAMDYW	ko	38	2.05405	1642	88.7568	634	34.2703
1660	clonotype754	IGH	IGHM	Hc	IGHV4-1	None	IGHJ4	CARGGVTTVVPSYAMDYW	ko	41	2.21622	1642	88.7568	634	34.2703
1661	clonotype755	IGH	IGHM	Hc	IGHV8-12	None	IGHJ4	CARKRGNYAMDYW	ko	38	2.05405	1642	88.7568	634	34.2703
1662	clonotype756	IGH	IGHM	Hc	IGHV6-3	None	IGHJ3	CTRGYDAWFAYW	ko	82	4.43243	1642	88.7568	448	24.2162
1663	clonotype758	IGH	IGHM	Hc	IGHV1-26	None	IGHJ4	CARRYYSNYAHYYAMDYW	ko	130	7.02703	1642	88.7568	634	34.2703
1664	clonotype759	IGH	IGHM	Hc	IGHV1-78	None	IGHJ2	CARGKGYDLYYFDYW	ko	26	1.40541	1642	88.7568	498	26.9189
1665	clonotype760	IGH	None	Hc	IGHV1-77	IGHD1-1	IGHJ4	CARSVSYYYGSSTYAMDYW	ko	5	0.27027	150	8.10811	634	34.2703
1666	clonotype761	IGH	IGHM	Hc	IGHV9-4	None	IGHJ2	CARGNDYDEDYFDYW	ko	17	0.918919	1642	88.7568	498	26.9189
1667	clonotype764	IGH	None	Hc	IGHV4-1	None	IGHJ4	CAVYGSSLYYYAMDYW	ko	41	2.21622	1642	88.7568	634	34.2703
1668	clonotype766	IGH	IGHM	Hc	IGHV14-4	None	IGHJ2	CTTEENYGNYLDYW	ko	24	1.2973	1642	88.7568	498	26.9189
1669	clonotype767	IGH	IGHM	Hc	IGHV1-64	IGHD1-1	IGHJ4	CAREGYYYGSSYPYYYAMDYW	ko	36	1.94595	150	8.10811	634	34.2703
1670	clonotype768	IGH	IGHM	Hc	IGHV1-26	IGHD1-1	IGHJ2	CARSFYYYGSSYVYYFDYW	ko	130	7.02703	150	8.10811	498	26.9189
1671	clonotype769	IGH	IGHM	Hc	IGHV1-76	IGHD1-1	IGHJ3	CASYYYGSSLFAYW	ko	13	0.702703	150	8.10811	448	24.2162
1672	clonotype770	IGH	None	Hc	IGHV4-1	None	IGHJ1	CARPFITTAYWYFDVW	ko	41	2.21622	1642	88.7568	270	14.5946
1673	clonotype771	IGH	IGHM	Hc	IGHV3-6	None	IGHJ4	CARYGYDNAMDYW	ko	135	7.2973	1642	88.7568	634	34.2703
1674	clonotype772	IGH	IGHM	Hc	IGHV2-5	None	IGHJ3	CAKDGYFLFAYW	ko	16	0.864865	1642	88.7568	448	24.2162
1675	clonotype773	IGH	None	Hc	IGHV1-18	None	IGHJ3	CARRTAQATPFAYW	ko	47	2.54054	1642	88.7568	448	24.2162
1676	clonotype774	IGH	IGHM	Hc	IGHV1-84	None	IGHJ4	CARWTYYSNWDAMDYW	ko	10	0.540541	1642	88.7568	634	34.2703
1677	clonotype775	IGH	IGHM	Hc	IGHV1-81	None	IGHJ2	CGAREGYLDYW	ko	39	2.10811	1642	88.7568	498	26.9189
1678	clonotype777	IGH	IGHM	Hc	IGHV9-3	IGHD1-1	IGHJ3	CARTRIYYYGSSHAWFAYW	ko	89	4.81081	150	8.10811	448	24.2162
1679	clonotype779	IGH	IGHM	Hc	IGHV1-22	None	IGHJ4	CARDSNYLYAMDYW	ko	38	2.05405	1642	88.7568	634	34.2703
1680	clonotype780	IGH	IGHM	Hc	IGHV3-6	None	IGHJ3	CARDLDGSLAYW	ko	135	7.2973	1642	88.7568	448	24.2162
1681	clonotype782	IGH	IGHM	Hc	IGHV1-47	IGHD2-3	IGHJ4	CARGGIYDGYYDAMDYW	ko	8	0.432432	7	0.378378	634	34.2703
1682	clonotype783	IGH	IGHM	Hc	IGHV3-1	None	IGHJ4	CAIRDYYGSSPLAMDYW	ko	21	1.13514	1642	88.7568	634	34.2703
1683	clonotype784	IGH	IGHM	Hc	IGHV3-6	None	IGHJ2	CATDYYDYLFDYW	ko	135	7.2973	1642	88.7568	498	26.9189
1684	clonotype785	IGH	IGHM	Hc	IGHV2-3	None	IGHJ4	CAKALTTVDAMDYW	ko	16	0.864865	1642	88.7568	634	34.2703
1685	clonotype787	IGH	IGHM	Hc	IGHV1-59	None	IGHJ4	CAREEAMDYW	ko	6	0.324324	1642	88.7568	634	34.2703
1686	clonotype788	IGH	IGHM	Hc	IGHV1-53	None	IGHJ1	CARYDGYHWYFDVW	ko	29	1.56757	1642	88.7568	270	14.5946
1687	clonotype789	IGH	IGHM	Hc	IGHV5-17	None	IGHJ4	CARPQLTGSDYYAMDYW	ko	17	0.918919	1642	88.7568	634	34.2703
1688	clonotype791	IGH	IGHM	Hc	IGHV1-74	None	IGHJ4	CAILNYYGSSPHAMDYW	ko	13	0.702703	1642	88.7568	634	34.2703
1689	clonotype792	IGH	IGHM	Hc	IGHV1-39	None	IGHJ1	CARFYYGSSSRYWYFDVW	ko	39	2.10811	1642	88.7568	270	14.5946
1690	clonotype794	IGH	IGHM	Hc	IGHV10-3	None	IGHJ4	CVRDWDGYYPFYAMDYW	ko	33	1.78378	1642	88.7568	634	34.2703
1691	clonotype795	IGH	None	Hc	IGHV1-26	IGHD1-1	IGHJ3	CANYYGSSYKAWFAYW	ko	130	7.02703	150	8.10811	448	24.2162
1692	clonotype797	IGH	IGHM	Hc	IGHV3-6	None	IGHJ2	CARMPANWDDYW	ko	135	7.2973	1642	88.7568	498	26.9189
1693	clonotype799	IGH	IGHM	Hc	IGHV6-3	None	IGHJ2	CTGGRYFDYW	ko	82	4.43243	1642	88.7568	498	26.9189
1694	clonotype800	IGH	IGHM	Hc	IGHV1-26	None	IGHJ4	CALYGNYPYAMDYW	ko	130	7.02703	1642	88.7568	634	34.2703
1695	clonotype801	IGH	IGHM	Hc	IGHV8-8	IGHD2-4	IGHJ3	CARSIYYDYDGWFAYW	ko	78	4.21622	18	0.972973	448	24.2162
1696	clonotype802	IGH	IGHM	Hc	IGHV1-12	None	IGHJ2	CARGRGYSNYYFDYW	ko	12	0.648649	1642	88.7568	498	26.9189
1697	clonotype804	IGH	IGHM	Hc	IGHV1-26	None	IGHJ2	CRAITTVVDYYFDYW	ko	130	7.02703	1642	88.7568	498	26.9189
1698	clonotype810	IGH	None	Hc	IGHV1-80	None	IGHJ4	CARYGPRGAMDYW	ko	14	0.756757	1642	88.7568	634	34.2703
1699	clonotype812	IGH	IGHM	Hc	IGHV8-8	None	IGHJ2	CARIPYYGTYFDYW	ko	78	4.21622	1642	88.7568	498	26.9189
1700	clonotype813	IGH	IGHM	Hc	IGHV1-39	None	IGHJ4	CARSAYYRGDYAMDYW	ko	39	2.10811	1642	88.7568	634	34.2703
1701	clonotype814	IGH	IGHM	Hc	IGHV15-2	None	IGHJ4	CARGGYSNYSYYAMDYW	ko	13	0.702703	1642	88.7568	634	34.2703
1702	clonotype817	IGH	None	Hc	IGHV8-8	IGHD2-4	IGHJ3	CARFYYDYDGVAYW	ko	78	4.21622	18	0.972973	448	24.2162
1703	clonotype818	IGH	None	Hc	IGHV1-26	None	IGHJ4	CARGLLGAMDYW	ko	130	7.02703	1642	88.7568	634	34.2703
1704	clonotype819	IGH	IGHM	Hc	IGHV6-3	None	IGHJ4	CTGSRGAMDYW	ko	82	4.43243	1642	88.7568	634	34.2703
1705	clonotype821	IGH	None	Hc	IGHV8-5	None	IGHJ4	CAQVPVGGGYAMDYW	ko	6	0.324324	1642	88.7568	634	34.2703
1706	clonotype822	IGH	IGHM	Hc	IGHV5-9-1	None	IGHJ2	CTRDRYYGSSSVYFDYW	ko	12	0.648649	1642	88.7568	498	26.9189
1707	clonotype823	IGH	IGHM	Hc	IGHV5-9-1	None	IGHJ1	CTNGYFDVW	ko	12	0.648649	1642	88.7568	270	14.5946
1708	clonotype825	IGH	IGHM	Hc	IGHV1-55	None	IGHJ2	CARSSSGYGDYW	ko	14	0.756757	1642	88.7568	498	26.9189
1709	clonotype826	IGH	IGHM	Hc	IGHV1-18	None	IGHJ3	CARLTYYDYFAYW	ko	47	2.54054	1642	88.7568	448	24.2162
1710	clonotype827	IGH	IGHM	Hc	IGHV3-6	IGHD2-5	IGHJ4	CARDRAYYSNYNAMDYW	ko	135	7.2973	12	0.648649	634	34.2703
1711	clonotype829	IGH	IGHM	Hc	IGHV9-3	IGHD1-1	IGHJ2	CATFDYYGSSYNYW	ko	89	4.81081	150	8.10811	498	26.9189
1712	clonotype830	IGH	IGHM	Hc	IGHV9-4	None	IGHJ1	CARNGSPYWYFDVW	ko	17	0.918919	1642	88.7568	270	14.5946
1713	clonotype831	IGH	IGHM	Hc	IGHV1-39	IGHD1-1	IGHJ4	CARSGPDYYGSSYDGYAMDYW	ko	39	2.10811	150	8.10811	634	34.2703
1714	clonotype835	IGH	IGHM	Hc	IGHV1-58	None	IGHJ4	CARWLLRDYYYAMDYW	ko	15	0.810811	1642	88.7568	634	34.2703
1715	clonotype836	IGH	IGHM	Hc	IGHV6-3	None	IGHJ4	CTGSNPYYYAMDYW	ko	82	4.43243	1642	88.7568	634	34.2703
1716	clonotype837	IGH	IGHM	Hc	IGHV8-8	None	IGHJ2	CARMAIGTVVADYW	ko	78	4.21622	1642	88.7568	498	26.9189
1717	clonotype840	IGH	IGHM	Hc	IGHV3-6	None	IGHJ4	CARDGYYERYYAMDYW	ko	135	7.2973	1642	88.7568	634	34.2703
1718	clonotype843	IGH	IGHM	Hc	IGHV1-39	None	IGHJ4	CARESGTEGLYAMDYW	ko	39	2.10811	1642	88.7568	634	34.2703
1719	clonotype844	IGH	IGHM	Hc	IGHV9-3	IGHD1-1	IGHJ2	CARDYYGSRYFDYW	ko	89	4.81081	150	8.10811	498	26.9189
1720	clonotype845	IGH	IGHM	Hc	IGHV2-5	None	IGHJ4	CVKKDWDYAMDYW	ko	16	0.864865	1642	88.7568	634	34.2703
1721	clonotype847	IGH	IGHM	Hc	IGHV1-26	None	IGHJ4	CANGNEASDYW	ko	130	7.02703	1642	88.7568	634	34.2703
1722	clonotype848	IGH	IGHM	Hc	IGHV8-8	None	IGHJ2	CARTHYYGSKDFDYW	ko	78	4.21622	1642	88.7568	498	26.9189
1723	clonotype849	IGH	IGHM	Hc	IGHV1-19	None	IGHJ3	CAREKHRGFAYW	ko	49	2.64865	1642	88.7568	448	24.2162
1724	clonotype850	IGH	IGHM	Hc	IGHV3-6	None	IGHJ4	CARVYDYGGYYYAMDYW	ko	135	7.2973	1642	88.7568	634	34.2703
1725	clonotype851	IGH	IGHM	Hc	IGHV6-3	None	IGHJ3	CTGLYYDYGWFAYW	ko	82	4.43243	1642	88.7568	448	24.2162
1726	clonotype852	IGH	IGHM	Hc	IGHV5-16	None	IGHJ2	CAREEYYYGSSPYFDYW	ko	29	1.56757	1642	88.7568	498	26.9189
1727	clonotype854	IGH	IGHM	Hc	IGHV14-4	None	IGHJ3	CTLNLLLRYWFAYW	ko	24	1.2973	1642	88.7568	448	24.2162
1728	clonotype860	IGH	IGHM	Hc	IGHV9-4	IGHD1-1	IGHJ4	CARGGSIITTVVATGGAMDYW	ko	17	0.918919	150	8.10811	634	34.2703
1729	clonotype861	IGH	IGHM	Hc	IGHV3-6	None	IGHJ2	CARERETGYFDYW	ko	135	7.2973	1642	88.7568	498	26.9189
1730	clonotype863	IGH	IGHM	Hc	IGHV1-78	None	IGHJ2	CAKEVTTVVDDYFDYW	ko	26	1.40541	1642	88.7568	498	26.9189
1731	clonotype864	IGH	IGHM	Hc	IGHV3-6	None	IGHJ3	CARDSIYYYGSGLAYW	ko	135	7.2973	1642	88.7568	448	24.2162
1732	clonotype865	IGH	IGHM	Hc	IGHV1-18	IGHD2-5	IGHJ3	CATYYSNYEWVWFAYW	ko	47	2.54054	12	0.648649	448	24.2162
1733	clonotype867	IGH	IGHM	Hc	IGHV10-1	None	IGHJ4	CVRRGDMDYW	ko	27	1.45946	1642	88.7568	634	34.2703
1734	clonotype868	IGH	IGHM	Hc	IGHV5-4	None	IGHJ4	CARVGGPYAMDYW	ko	23	1.24324	1642	88.7568	634	34.2703
1735	clonotype869	IGH	IGHM	Hc	IGHV4-1	None	IGHJ3	CARRDYDYDWFAYW	ko	41	2.21622	1642	88.7568	448	24.2162
1736	clonotype870	IGH	IGHM	Hc	IGHV9-2	None	IGHJ2	CAKGDYGNFYYFDYW	ko	9	0.486486	1642	88.7568	498	26.9189
1737	clonotype873	IGH	IGHM	Hc	IGHV1-81	None	IGHJ2	CAREWDDLFDYW	ko	39	2.10811	1642	88.7568	498	26.9189
1738	clonotype878	IGH	IGHM	Hc	IGHV3-6	None	IGHJ3	CAREFHYYGSRDFAYW	ko	135	7.2973	1642	88.7568	448	24.2162
1739	clonotype879	IGH	IGHM	Hc	IGHV3-3	None	IGHJ4	CARGGAVVEGYYAMDYW	ko	5	0.27027	1642	88.7568	634	34.2703
1740	clonotype880	IGH	IGHM	Hc	IGHV7-1	None	IGHJ4	CARDEGPHYAMDYW	ko	22	1.18919	1642	88.7568	634	34.2703
1741	clonotype882	IGH	IGHM	Hc	IGHV8-8	None	IGHJ3	CALIYYDSAWFAYW	ko	78	4.21622	1642	88.7568	448	24.2162
1742	clonotype883	IGH	IGHM	Hc	IGHV1-58	None	IGHJ3	CAGGTGFAYW	ko	15	0.810811	1642	88.7568	448	24.2162
1743	clonotype884	IGH	IGHM	Hc	IGHV8-8	None	IGHJ1	CARIMGYYGSSYWYFDVW	ko	78	4.21622	1642	88.7568	270	14.5946
1744	clonotype885	IGH	IGHM	Hc	IGHV1-78	None	IGHJ4	CARGDSYAMDYW	ko	26	1.40541	1642	88.7568	634	34.2703
1745	clonotype886	IGH	IGHM	Hc	IGHV7-1	None	IGHJ4	CARAYDTYYYAMDYW	ko	22	1.18919	1642	88.7568	634	34.2703
1746	clonotype888	IGH	IGHM	Hc	IGHV1-18	None	IGHJ2	CARVAAYYGNFGGYYFDYW	ko	47	2.54054	1642	88.7568	498	26.9189
1747	clonotype889	IGH	IGHM	Hc	IGHV13-2	None	IGHJ4	CSRGDGYDAYAMDYW	ko	18	0.972973	1642	88.7568	634	34.2703
1748	clonotype890	IGH	IGHM	Hc	IGHV1-39	None	IGHJ3	CARGGVYSNYPAYW	ko	39	2.10811	1642	88.7568	448	24.2162
1749	clonotype892	IGH	IGHM	Hc	IGHV1-42	None	IGHJ2	CARIRENSNYFDYW	ko	15	0.810811	1642	88.7568	498	26.9189
1750	clonotype893	IGH	IGHM	Hc	IGHV1-78	None	IGHJ1	CARCYGSSYWYFDVW	ko	26	1.40541	1642	88.7568	270	14.5946
1751	clonotype894	IGH	IGHM	Hc	IGHV15-2	None	IGHJ1	CARKTTVVAWYFDVW	ko	13	0.702703	1642	88.7568	270	14.5946
1752	clonotype895	IGH	IGHM	Hc	IGHV1-69	None	IGHJ4	CARSTMDYDYAMDYW	ko	15	0.810811	1642	88.7568	634	34.2703
1753	clonotype896	IGH	IGHM	Hc	IGHV2-2	None	IGHJ2	CARNHVRGPFDYW	ko	48	2.59459	1642	88.7568	498	26.9189
1754	clonotype897	IGH	IGHM	Hc	IGHV1-75	None	IGHJ4	CARGGGSPTIYYAMDYW	ko	36	1.94595	1642	88.7568	634	34.2703
1755	clonotype899	IGH	IGHM	Hc	IGHV1-80	None	IGHJ2	CARRLGLRGFDYW	ko	14	0.756757	1642	88.7568	498	26.9189
1756	clonotype900	IGH	IGHM	Hc	IGHV1-81	None	IGHJ4	CARHYDNYYAMDYW	ko	39	2.10811	1642	88.7568	634	34.2703
1757	clonotype901	IGH	IGHM	Hc	IGHV7-1	None	IGHJ1	CARDALYSNHLWYFDVW	ko	22	1.18919	1642	88.7568	270	14.5946
1758	clonotype902	IGH	IGHM	Hc	IGHV5-16	None	IGHJ4	CARDRGGYDGYLGDYW	ko	29	1.56757	1642	88.7568	634	34.2703
1759	clonotype903	IGH	IGHM	Hc	IGHV4-1	None	IGHJ4	CARRDGYYAWDYW	ko	41	2.21622	1642	88.7568	634	34.2703
1760	clonotype904	IGH	IGHM	Hc	IGHV6-3	None	IGHJ2	CTRITTVVARDYFDYW	ko	82	4.43243	1642	88.7568	498	26.9189
1761	clonotype905	IGH	IGHM	Hc	IGHV3-6	None	IGHJ3	CARDYYGSSPFAYW	ko	135	7.2973	1642	88.7568	448	24.2162
1762	clonotype906	IGH	IGHM	Hc	IGHV15-2	None	IGHJ2	CARDGQYYFDYW	ko	13	0.702703	1642	88.7568	498	26.9189
1763	clonotype907	IGH	IGHM	Hc	IGHV1-37	None	IGHJ4	CARDYGSSYYYAMDYW	ko	3	0.162162	1642	88.7568	634	34.2703
1764	clonotype908	IGH	IGHM	Hc	IGHV8-8	None	IGHJ1	CARIVDYGSSYWYFDVW	ko	78	4.21622	1642	88.7568	270	14.5946
1765	clonotype909	IGH	None	Hc	IGHV6-6	None	IGHJ3	CTLTSWFAYW	ko	25	1.35135	1642	88.7568	448	24.2162
1766	clonotype910	IGH	IGHM	Hc	IGHV6-3	None	IGHJ2	CTYYGSSSFDYW	ko	82	4.43243	1642	88.7568	498	26.9189
1767	clonotype911	IGH	IGHM	Hc	IGHV8-8	None	IGHJ1	CARIRGWLLWYFDVW	ko	78	4.21622	1642	88.7568	270	14.5946
1768	clonotype912	IGH	IGHM	Hc	IGHV5-4	None	IGHJ2	CARDSLYYSKYFDYW	ko	23	1.24324	1642	88.7568	498	26.9189
1769	clonotype913	IGH	IGHM	Hc	IGHV8-8	None	IGHJ3	CARLYDYFAYW	ko	78	4.21622	1642	88.7568	448	24.2162
1770	clonotype914	IGH	IGHM	Hc	IGHV14-4	None	IGHJ3	CTTTGDYSNYVGFAYW	ko	24	1.2973	1642	88.7568	448	24.2162
1771	clonotype915	IGH	IGHM	Hc	IGHV14-2	None	IGHJ2	CARSLYYSFDYW	ko	14	0.756757	1642	88.7568	498	26.9189
1772	clonotype916	IGH	IGHM	Hc	IGHV3-6	None	IGHJ3	CAREMDYYSSFAYW	ko	135	7.2973	1642	88.7568	448	24.2162
1773	clonotype917	IGH	IGHM	Hc	IGHV1-78	None	IGHJ2	CTRSITTQHW	ko	26	1.40541	1642	88.7568	498	26.9189
1774	clonotype918	IGH	IGHM	Hc	IGHV1-7	None	IGHJ3	CAKEKINYYDYQAWFAYW	ko	3	0.162162	1642	88.7568	448	24.2162
1775	clonotype919	IGH	IGHM	Hc	IGHV1-53	None	IGHJ1	CARGGVDYYGSYWYFDVW	ko	29	1.56757	1642	88.7568	270	14.5946
1776	clonotype920	IGH	IGHM	Hc	IGHV6-3	None	IGHJ2	CTEGWLPFDYW	ko	82	4.43243	1642	88.7568	498	26.9189
1777	clonotype921	IGH	IGHM	Hc	IGHV10-3	None	IGHJ4	CVRDEAMDYW	ko	33	1.78378	1642	88.7568	634	34.2703
1778	clonotype922	IGH	IGHM	Hc	IGHV1-72	None	IGHJ2	CARDYDSDYW	ko	21	1.13514	1642	88.7568	498	26.9189
1779	clonotype924	IGH	IGHM	Hc	IGHV8-8	None	IGHJ2	CARIGYYGTPFDYW	ko	78	4.21622	1642	88.7568	498	26.9189
1780	clonotype926	IGH	IGHM	Hc	IGHV3-5	None	IGHJ1	CAREPHYDYERYWYFDVW	ko	4	0.216216	1642	88.7568	270	14.5946
1781	clonotype927	IGH	IGHM	Hc	IGHV2-2	None	IGHJ3	CARTGYSNYGGFAYW	ko	48	2.59459	1642	88.7568	448	24.2162
1782	clonotype928	IGH	IGHM	Hc	IGHV1-5	None	IGHJ3	CTISTMVTDGFAYW	ko	31	1.67568	1642	88.7568	448	24.2162
1783	clonotype929	IGH	IGHM	Hc	IGHV1-74	None	IGHJ1	CAIFPYYDYDGYFDVW	ko	13	0.702703	1642	88.7568	270	14.5946
1784	clonotype930	IGH	IGHM	Hc	IGHV13-2	None	IGHJ2	CSRWDYGSSALDYW	ko	18	0.972973	1642	88.7568	498	26.9189
1785	clonotype933	IGH	IGHM	Hc	IGHV1-36	None	IGHJ3	CAREGYYSNSWFAYW	ko	8	0.432432	1642	88.7568	448	24.2162
1786	clonotype935	IGH	IGHM	Hc	IGHV3-6	None	IGHJ4	CARVYDGYHYYYAMDYW	ko	135	7.2973	1642	88.7568	634	34.2703
1787	clonotype936	IGH	IGHM	Hc	IGHV1-64	None	IGHJ4	CARWSYYDYLYYYAMDYW	ko	36	1.94595	1642	88.7568	634	34.2703
1788	clonotype938	IGH	IGHM	Hc	IGHV5-16	IGHD1-1	IGHJ1	CARDYYYGSSYWYFDVW	ko	29	1.56757	150	8.10811	270	14.5946
1789	clonotype939	IGH	IGHM	Hc	IGHV1-54	None	IGHJ4	CARATVVHYYAMDYW	ko	15	0.810811	1642	88.7568	634	34.2703
1790	clonotype940	IGH	IGHM	Hc	IGHV1-26	None	IGHJ4	CERRLWLRHYAMDYW	ko	130	7.02703	1642	88.7568	634	34.2703
1791	clonotype941	IGH	IGHM	Hc	IGHV1-64	None	IGHJ3	CARYYGSSYWFAYW	ko	36	1.94595	1642	88.7568	448	24.2162
1792	clonotype942	IGH	IGHM	Hc	IGHV3-6	None	IGHJ4	CARLYGNGDYAMDYW	ko	135	7.2973	1642	88.7568	634	34.2703
1793	clonotype943	IGH	IGHM	Hc	IGHV5-4	None	IGHJ4	CARAYYGILYYAMDYW	ko	23	1.24324	1642	88.7568	634	34.2703
1794	clonotype944	IGH	IGHM	Hc	IGHV8-8	None	IGHJ3	CARIAGGKINYDYDWFAYW	ko	78	4.21622	1642	88.7568	448	24.2162
1795	clonotype948	IGH	IGHM	Hc	IGHV13-2	None	IGHJ4	CRGEGLYYDYEDYAMDYW	ko	18	0.972973	1642	88.7568	634	34.2703
1796	clonotype949	IGH	IGHM	Hc	IGHV3-6	None	IGHJ2	CARGGDSNYFDYW	ko	135	7.2973	1642	88.7568	498	26.9189
1797	clonotype950	IGH	IGHM	Hc	IGHV5-6	None	IGHJ3	CARQAPSGYGSSYWFAYW	ko	19	1.02703	1642	88.7568	448	24.2162
1798	clonotype951	IGH	IGHM	Hc	IGHV1-64	IGHD1-1	IGHJ4	CAGIYYYGSSSHAMDYW	ko	36	1.94595	150	8.10811	634	34.2703
1799	clonotype952	IGH	IGHM	Hc	IGHV6-6	None	IGHJ3	CTRYSAWFAYW	ko	25	1.35135	1642	88.7568	448	24.2162
1800	clonotype953	IGH	IGHM	Hc	IGHV2-9-1	IGHD1-1	IGHJ1	CARNPTNYYGSSHWYFDVW	ko	21	1.13514	150	8.10811	270	14.5946
1801	clonotype954	IGH	IGHM	Hc	IGHV1-75	None	IGHJ3	CARENYSNYVASWFAYW	ko	36	1.94595	1642	88.7568	448	24.2162
1802	clonotype955	IGH	IGHM	Hc	IGHV2-5	None	IGHJ2	CAPGDYFDYW	ko	16	0.864865	1642	88.7568	498	26.9189
1803	clonotype956	IGH	IGHM	Hc	IGHV2-5	None	IGHJ4	CAKNSFYDYGGLGAMDYW	ko	16	0.864865	1642	88.7568	634	34.2703
1804	clonotype957	IGH	IGHM	Hc	IGHV3-6	IGHD1-1	IGHJ2	CARGVLIYYYGSSYYFDYW	ko	135	7.2973	150	8.10811	498	26.9189
1805	clonotype958	IGH	IGHM	Hc	IGHV1-26	None	IGHJ4	CARRRAMDYW	ko	130	7.02703	1642	88.7568	634	34.2703
1806	clonotype959	IGH	None	Hc	IGHV5-16	None	IGHJ4	CAREGGLRRPTAYYYAMDYW	ko	29	1.56757	1642	88.7568	634	34.2703
1807	clonotype960	IGH	IGHM	Hc	IGHV1-64	IGHD1-1	IGHJ2	CAREDYYYGSRFDYW	ko	36	1.94595	150	8.10811	498	26.9189
1808	clonotype961	IGH	IGHM	Hc	IGHV8-12	None	IGHJ1	CARRRDYDGSFDVW	ko	38	2.05405	1642	88.7568	270	14.5946
1809	clonotype964	IGH	IGHM	Hc	IGHV9-3	None	IGHJ1	CAREDGYYWYFDVW	ko	89	4.81081	1642	88.7568	270	14.5946
1810	clonotype965	IGH	IGHM	Hc	IGHV1-72	None	IGHJ1	CARTGSRRYFDVW	ko	21	1.13514	1642	88.7568	270	14.5946
1811	clonotype966	IGH	IGHM	Hc	IGHV7-3	None	IGHJ3	CARVGWDGGFAYW	ko	27	1.45946	1642	88.7568	448	24.2162
1812	clonotype967	IGH	IGHM	Hc	IGHV1-18	None	IGHJ2	CARSNYYGSSPFDYW	ko	47	2.54054	1642	88.7568	498	26.9189
1813	clonotype968	IGH	IGHM	Hc	IGHV14-4	None	IGHJ2	CTLLSVPNSYYFDYW	ko	24	1.2973	1642	88.7568	498	26.9189
1814	clonotype970	IGH	IGHM	Hc	IGHV1-53	None	IGHJ4	CARWEDYSNFYAMDYW	ko	29	1.56757	1642	88.7568	634	34.2703
1815	clonotype972	IGH	IGHM	Hc	IGHV14-4	None	IGHJ3	CTRDWDASFAYW	ko	24	1.2973	1642	88.7568	448	24.2162
1816	clonotype974	IGH	IGHM	Hc	IGHV1-19	None	IGHJ2	CARDESYW	ko	49	2.64865	1642	88.7568	498	26.9189
1817	clonotype975	IGH	IGHM	Hc	IGHV9-3	None	IGHJ2	CAREDGSSYVPDYW	ko	89	4.81081	1642	88.7568	498	26.9189
1818	clonotype976	IGH	IGHM	Hc	IGHV9-1	IGHD1-1	IGHJ1	CVRLITYYGSSYRYFDVW	ko	18	0.972973	150	8.10811	270	14.5946
1819	clonotype977	IGH	IGHM	Hc	IGHV1-39	None	IGHJ3	CARSDYDYRGGFAYW	ko	39	2.10811	1642	88.7568	448	24.2162
1820	clonotype978	IGH	IGHM	Hc	IGHV1-55	None	IGHJ1	CALYSNYGGWYFDVW	ko	14	0.756757	1642	88.7568	270	14.5946
1821	clonotype979	IGH	IGHM	Hc	IGHV8-8	None	IGHJ2	CARIASYDYFDYW	ko	78	4.21622	1642	88.7568	498	26.9189
1822	clonotype980	IGH	IGHM	Hc	IGHV1-36	None	IGHJ4	CARFASRDYYAMDYW	ko	8	0.432432	1642	88.7568	634	34.2703
1823	clonotype982	IGH	IGHM	Hc	IGHV1-72	None	IGHJ4	CARDYGSSYDFHYYAMDYW	ko	21	1.13514	1642	88.7568	634	34.2703
1824	clonotype984	IGH	IGHM	Hc	IGHV8-8	None	IGHJ2	CARIAPSYGNYYFDYW	ko	78	4.21622	1642	88.7568	498	26.9189
1825	clonotype985	IGH	IGHM	Hc	IGHV1-77	None	IGHJ3	CARIGSSFSWFAYW	ko	5	0.27027	1642	88.7568	448	24.2162
1826	clonotype986	IGH	IGHM	Hc	IGHV3-6	IGHD1-1	IGHJ2	CARHYYGSSYHFDYW	ko	135	7.2973	150	8.10811	498	26.9189
1827	clonotype987	IGH	IGHM	Hc	IGHV1-62-2	None	IGHJ1	CARHEEGLYYGNSGWYVDAW	ko	16	0.864865	1642	88.7568	270	14.5946
1828	clonotype989	IGH	IGHM	Hc	IGHV6-3	None	IGHJ3	CTAAYYYGRFAYW	ko	82	4.43243	1642	88.7568	448	24.2162
1829	clonotype990	IGH	None	Hc	IGHV1-26	None	IGHJ4	CASLLWWGFYYAMDYW	ko	130	7.02703	1642	88.7568	634	34.2703
1830	clonotype991	IGH	IGHM	Hc	IGHV1-26	None	IGHJ2	CARSKGYFYYFDYW	ko	130	7.02703	1642	88.7568	498	26.9189
1831	clonotype992	IGH	IGHM	Hc	IGHV3-1	None	IGHJ3	CARAEGYDGAWFAYW	ko	21	1.13514	1642	88.7568	448	24.2162
1832	clonotype993	IGH	IGHM	Hc	IGHV1-7	None	IGHJ2	CARTGDGNPGDLYYW	ko	3	0.162162	1642	88.7568	498	26.9189
1833	clonotype995	IGH	IGHM	Hc	IGHV1-9	None	IGHJ1	CARRCVPVSWYFDVW	ko	27	1.45946	1642	88.7568	270	14.5946
1834	clonotype996	IGH	IGHM	Hc	IGHV7-3	None	IGHJ2	CARYIPYDGYYDYW	ko	27	1.45946	1642	88.7568	498	26.9189
1835	clonotype997	IGH	IGHM	Hc	IGHV1-18	None	IGHJ4	CARSGYGNPYYYAMDYW	ko	47	2.54054	1642	88.7568	634	34.2703
1836	clonotype998	IGH	IGHM	Hc	IGHV1-20	None	IGHJ1	CARGGRYFDVW	ko	7	0.378378	1642	88.7568	270	14.5946
1837	clonotype999	IGH	IGHM	Hc	IGHV5-9-1	None	IGHJ4	CTRRGYGSSYAMDYW	ko	12	0.648649	1642	88.7568	634	34.2703
1838	clonotype1168	IGH	IGHM	Hc	IGHV10-3	None	IGHJ2	CVREGIDDGYFFDYW	ko	33	1.78378	1642	88.7568	498	26.9189
1839	clonotype1197	IGH	IGHM	Hc	IGHV13-2	None	IGHJ2	CSRGGTVVATDYFDYW	ko	18	0.972973	1642	88.7568	498	26.9189
1840	clonotype1472	IGH	IGHM	Hc	IGHV7-1	None	IGHJ4	CARDAGYSNPW	ko	22	1.18919	1642	88.7568	634	34.2703
1841	clonotype1632	IGH	IGHM	Hc	IGHV10-3	None	IGHJ2	CVRASQGNYFDYW	ko	33	1.78378	1642	88.7568	498	26.9189
1842	clonotype2088	IGH	IGHM	Hc	IGHV3-5	None	IGHJ4	CARESNHAMDYW	ko	4	0.216216	1642	88.7568	634	34.2703
1843	clonotype2115	IGH	IGHM	Hc	IGHV7-1	None	IGHJ3	CARDDGYYTFAYW	ko	22	1.18919	1642	88.7568	448	24.2162
1844	clonotype2164	IGH	IGHM	Hc	IGHV3-3	None	IGHJ2	CARDALYGNPDYW	ko	5	0.27027	1642	88.7568	498	26.9189
1845	clonotype2680	IGH	IGHM	Hc	IGHV4-1	None	IGHJ3	CARGGNLYYSNYVWFAYW	ko	41	2.21622	1642	88.7568	448	24.2162
1846	clonotype318	IGH	IGHM	Hc	IGHV3-1	None	IGHJ3	CARVPDGYSVWFAYW	ko	21	1.13514	1642	88.7568	448	24.2162
1847	clonotype376	IGH	IGHM	Hc	IGHV1-9	IGHD1-1	IGHJ2	CARRFYYYGSSWDYW	ko	27	1.45946	150	8.10811	498	26.9189
1848	clonotype898	IGH	IGHM	Hc	IGHV1-81	None	IGHJ2	CEGLLLRPIFDYW	ko	39	2.10811	1642	88.7568	498	26.9189
1849	clonotype932	IGH	IGHM	Hc	IGHV2-5	None	IGHJ4	CAKRYYGSSLYAMDYW	ko	16	0.864865	1642	88.7568	634	34.2703
1850	clonotype946	IGH	IGHM	Hc	IGHV9-4	None	IGHJ4	CARFYYGGAMDYW	ko	17	0.918919	1642	88.7568	634	34.2703
1851	clonotype1001	IGH	IGHM	Hc	IGHV3-6	IGHD1-1	IGHJ1	CAIITTVVANWYFDVW	wt	158	7.44581	195	9.18944	311	14.656
1852	clonotype1002	IGH	IGHM	Hc	IGHV5-17	IGHD1-1	IGHJ1	CASPYYYGSSYVLWYFDVW	wt	26	1.22526	195	9.18944	311	14.656
1853	clonotype1003	IGH	IGHM	Hc	IGHV10-1	None	IGHJ3	CVRDTTDSFAYW	wt	46	2.16777	1846	86.9934	507	23.8926
1854	clonotype1004	IGH	IGHD	Hc	IGHV5-16	IGHD2-4	IGHJ2	CARAPIYYDYDEGGYYFDYW	wt	28	1.31951	21	0.989632	519	24.4581
1855	clonotype1005	IGH	IGHM	Hc	IGHV1-19	IGHD1-1	IGHJ1	CARTHYYGRSYWYFDVW	wt	57	2.68615	195	9.18944	311	14.656
1856	clonotype1006	IGH	IGHM	Hc	IGHV2-5	None	IGHJ3	CAKGAWFAYW	wt	5	0.235627	1846	86.9934	507	23.8926
1857	clonotype1007	IGH	IGHM	Hc	IGHV5-9	None	IGHJ2	CARHTVVAPTYW	wt	11	0.518379	1846	86.9934	519	24.4581
1858	clonotype1008	IGH	IGHM	Hc	IGHV1-64	None	IGHJ1	CARGFYGNRGRYFDVW	wt	23	1.08388	1846	86.9934	311	14.656
1859	clonotype1009	IGH	None	Hc	IGHV5-17	None	IGHJ4	CAMDSNRAMDYW	wt	26	1.22526	1846	86.9934	785	36.9934
1860	clonotype1010	IGH	IGHM	Hc	IGHV3-6	None	IGHJ3	CARRAAQATFAWFAYW	wt	158	7.44581	1846	86.9934	507	23.8926
1861	clonotype1012	IGH	None	Hc	IGHV1-26	None	IGHJ3	CARGYYGSRAWFAYW	wt	174	8.19981	1846	86.9934	507	23.8926
1862	clonotype1013	IGH	IGHM	Hc	IGHV1-74	None	IGHJ4	CALTTVVHYYAMDYW	wt	9	0.424128	1846	86.9934	785	36.9934
1863	clonotype1014	IGH	IGHM	Hc	IGHV1-76	None	IGHJ4	CARHYDYDVGGAMDYW	wt	16	0.754006	1846	86.9934	785	36.9934
1864	clonotype1015	IGH	IGHM	Hc	IGHV3-6	None	IGHJ2	CARDQVTTMEFDYW	wt	158	7.44581	1846	86.9934	519	24.4581
1865	clonotype1016	IGH	IGHM	Hc	IGHV1-18	None	IGHJ4	CARRTTVVPHYYAMDYW	wt	65	3.06315	1846	86.9934	785	36.9934
1866	clonotype1017	IGH	IGHM	Hc	IGHV1-19	None	IGHJ3	CASQGDFTTVPQSSWFAYW	wt	57	2.68615	1846	86.9934	507	23.8926
1867	clonotype1019	IGH	IGHM	Hc	IGHV5-4	None	IGHJ4	CARDRKSNRGGLYAMDYW	wt	30	1.41376	1846	86.9934	785	36.9934
1868	clonotype1020	IGH	IGHM	Hc	IGHV1-26	None	IGHJ2	CARLGYYGSSYFDYW	wt	174	8.19981	1846	86.9934	519	24.4581
1869	clonotype1021	IGH	IGHM	Hc	IGHV1-75	IGHD1-1	IGHJ2	CARYHYYYGSSDYW	wt	51	2.40339	195	9.18944	519	24.4581
1870	clonotype1022	IGH	IGHM	Hc	IGHV3-6	None	IGHJ4	CARAPLYYYGTGYYAMDYW	wt	158	7.44581	1846	86.9934	785	36.9934
1871	clonotype1023	IGH	IGHM	Hc	IGHV1-19	None	IGHJ1	CAKDDDGYPWGYFDVW	wt	57	2.68615	1846	86.9934	311	14.656
1872	clonotype1024	IGH	IGHM	Hc	IGHV1-82	IGHD1-1	IGHJ4	CASITTVVATEDYYAMDYW	wt	18	0.848256	195	9.18944	785	36.9934
1873	clonotype1026	IGH	IGHM	Hc	IGHV7-3	None	IGHJ4	CARYNYGSVMDYW	wt	26	1.22526	1846	86.9934	785	36.9934
1874	clonotype1030	IGH	None	Hc	IGHV1-62-2	None	IGHJ3	CARHEAYYGGFAYW	wt	8	0.377003	1846	86.9934	507	23.8926
1875	clonotype1031	IGH	IGHM	Hc	IGHV1-26	None	IGHJ2	CARSRYSNCDYW	wt	174	8.19981	1846	86.9934	519	24.4581
1876	clonotype1032	IGH	IGHM	Hc	IGHV14-4	None	IGHJ2	CTTAMVTTTGVDYW	wt	18	0.848256	1846	86.9934	519	24.4581
1877	clonotype1033	IGH	IGHM	Hc	IGHV10-3	None	IGHJ3	CVREGSSYLFAYW	wt	46	2.16777	1846	86.9934	507	23.8926
1878	clonotype1034	IGH	IGHM	Hc	IGHV1-18	IGHD3-2	IGHJ3	CARLLDSSGYGWFAYW	wt	65	3.06315	5	0.235627	507	23.8926
1879	clonotype1035	IGH	IGHM	Hc	IGHV5-17	IGHD2-5	IGHJ4	CAPYYSNYGYAMDYW	wt	26	1.22526	18	0.848256	785	36.9934
1880	clonotype1036	IGH	IGHM	Hc	IGHV14-3	IGHD2-5	IGHJ4	CARGAYYSNYDAMDYW	wt	18	0.848256	18	0.848256	785	36.9934
1881	clonotype1037	IGH	IGHM	Hc	IGHV1-18	None	IGHJ4	CARCGAMDYW	wt	65	3.06315	1846	86.9934	785	36.9934
1882	clonotype1038	IGH	IGHM	Hc	IGHV3-6	None	IGHJ4	CARGGEGMDYW	wt	158	7.44581	1846	86.9934	785	36.9934
1883	clonotype1039	IGH	IGHM	Hc	IGHV1-19	IGHD2-5	IGHJ4	CARCEAYYSNYVYAMDYW	wt	57	2.68615	18	0.848256	785	36.9934
1884	clonotype1040	IGH	IGHM	Hc	IGHV1-9	None	IGHJ3	CARSGDYYGSYW	wt	42	1.97926	1846	86.9934	507	23.8926
1885	clonotype1041	IGH	IGHM	Hc	IGHV8-8	None	IGHJ4	CARIEITTVNYYAMDYW	wt	113	5.32516	1846	86.9934	785	36.9934
1886	clonotype1043	IGH	IGHM	Hc	IGHV9-3	None	IGHJ2	CARWGLRRDFYYFDYW	wt	129	6.07917	1846	86.9934	519	24.4581
1887	clonotype1044	IGH	IGHM	Hc	IGHV5-4	None	IGHJ3	CARAGFAYW	wt	30	1.41376	1846	86.9934	507	23.8926
1888	clonotype1045	IGH	IGHM	Hc	IGHV9-3	IGHD1-1	IGHJ4	CANSITTVVATPLAMDYW	wt	129	6.07917	195	9.18944	785	36.9934
1889	clonotype1046	IGH	IGHM	Hc	IGHV1-52	None	IGHJ3	CARPWTAQATEFAYW	wt	5	0.235627	1846	86.9934	507	23.8926
1890	clonotype1047	IGH	IGHM	Hc	IGHV1-9	None	IGHJ2	CARYRTWEFGYW	wt	42	1.97926	1846	86.9934	519	24.4581
1891	clonotype1049	IGH	IGHM	Hc	IGHV1-55	None	IGHJ1	CGGNSTGYFDVW	wt	8	0.377003	1846	86.9934	311	14.656
1892	clonotype1050	IGH	IGHD	Hc	IGHV5-4	None	IGHJ2	CARGYGFDYW	wt	30	1.41376	1846	86.9934	519	24.4581
1893	clonotype1051	IGH	IGHM	Hc	IGHV8-8	None	IGHJ4	CARRGPITTVVGAMDYW	wt	113	5.32516	1846	86.9934	785	36.9934
1894	clonotype1052	IGH	IGHM	Hc	IGHV8-8	None	IGHJ3	CARIGDGYYW	wt	113	5.32516	1846	86.9934	507	23.8926
1895	clonotype1053	IGH	IGHM	Hc	IGHV1-18	None	IGHJ4	CARNRYYYAMDYW	wt	65	3.06315	1846	86.9934	785	36.9934
1896	clonotype1054	IGH	IGHM	Hc	IGHV1-26	None	IGHJ4	CARWSHYYGSSPPYYAMDYW	wt	174	8.19981	1846	86.9934	785	36.9934
1897	clonotype1055	IGH	IGHM	Hc	IGHV9-4	None	IGHJ4	CAVFYAMDYW	wt	21	0.989632	1846	86.9934	785	36.9934
1898	clonotype1056	IGH	IGHM	Hc	IGHV9-3	None	IGHJ3	CAREEGYDGDWFAYW	wt	129	6.07917	1846	86.9934	507	23.8926
1899	clonotype1057	IGH	IGHM	Hc	IGHV1-5	None	IGHJ3	CTREESHAWFAYW	wt	46	2.16777	1846	86.9934	507	23.8926
1900	clonotype1058	IGH	None	Hc	IGHV1-49	None	IGHJ2	CARGAYYGSSLDYW	wt	13	0.61263	1846	86.9934	519	24.4581
1901	clonotype1059	IGH	None	Hc	IGHV1-85	None	IGHJ4	CARGPTGKGAMDYW	wt	16	0.754006	1846	86.9934	785	36.9934
1902	clonotype1060	IGH	IGHM	Hc	IGHV8-8	IGHD1-1	IGHJ2	CARKVDYYGSSYLDYW	wt	113	5.32516	195	9.18944	519	24.4581
1903	clonotype1061	IGH	IGHM	Hc	IGHV3-6	None	IGHJ2	CAIGITTVYYFDYW	wt	158	7.44581	1846	86.9934	519	24.4581
1904	clonotype1062	IGH	IGHM	Hc	IGHV1-82	None	IGHJ3	CARGDSNSFAYW	wt	18	0.848256	1846	86.9934	507	23.8926
1905	clonotype1063	IGH	IGHM	Hc	IGHV9-1	None	IGHJ2	CVRHYYGSSSYYFDYW	wt	21	0.989632	1846	86.9934	519	24.4581
1906	clonotype1064	IGH	IGHM	Hc	IGHV1-74	None	IGHJ3	CAIDDYDGGPFAYW	wt	9	0.424128	1846	86.9934	507	23.8926
1907	clonotype1065	IGH	IGHM	Hc	IGHV6-6	None	IGHJ4	CTRRGVTTAMDYW	wt	65	3.06315	1846	86.9934	785	36.9934
1908	clonotype1066	IGH	IGHM	Hc	IGHV9-3	None	IGHJ2	CARPYYYGSTLYYFDYW	wt	129	6.07917	1846	86.9934	519	24.4581
1909	clonotype1067	IGH	IGHM	Hc	IGHV2-9	None	IGHJ3	CARIYYGRSWFAYW	wt	3	0.141376	1846	86.9934	507	23.8926
1910	clonotype1068	IGH	IGHM	Hc	IGHV5-17	IGHD1-1	IGHJ4	CARTYYYGSSSRDAMDYW	wt	26	1.22526	195	9.18944	785	36.9934
1911	clonotype1070	IGH	IGHD	Hc	IGHV1-9	None	IGHJ2	CARERDYDYSFDYW	wt	42	1.97926	1846	86.9934	519	24.4581
1912	clonotype1071	IGH	IGHM	Hc	IGHV1-26	None	IGHJ3	CARGAPAWFAYW	wt	174	8.19981	1846	86.9934	507	23.8926
1913	clonotype1072	IGH	IGHM	Hc	IGHV5-17	None	IGHJ2	CARPDGYYTPFDYW	wt	26	1.22526	1846	86.9934	519	24.4581
1914	clonotype1073	IGH	IGHM	Hc	IGHV3-3	None	IGHJ4	CARAQNWDCAMDYW	wt	4	0.188501	1846	86.9934	785	36.9934
1915	clonotype1074	IGH	IGHM	Hc	IGHV1-64	None	IGHJ2	CARDGYYYGSSPGYFDYW	wt	23	1.08388	1846	86.9934	519	24.4581
1916	clonotype1078	IGH	IGHM	Hc	IGHV1-26	IGHD1-1	IGHJ3	CARIFLYYGSSYAFAYW	wt	174	8.19981	195	9.18944	507	23.8926
1917	clonotype1079	IGH	IGHM	Hc	IGHV1-49	None	IGHJ1	CARDTTVGYFDVW	wt	13	0.61263	1846	86.9934	311	14.656
1918	clonotype1080	IGH	IGHM	Hc	IGHV6-3	None	IGHJ4	CTDYYRGAMDYW	wt	92	4.33553	1846	86.9934	785	36.9934
1919	clonotype1081	IGH	IGHM	Hc	IGHV1-11	None	IGHJ2	CGRDYDFDYW	wt	5	0.235627	1846	86.9934	519	24.4581
1920	clonotype1082	IGH	IGHM	Hc	IGHV1-63	None	IGHJ4	CARYYYDYDAYAMDYW	wt	8	0.377003	1846	86.9934	785	36.9934
1921	clonotype1083	IGH	IGHM	Hc	IGHV8-8	None	IGHJ4	CARIGTWLLRAMDYW	wt	113	5.32516	1846	86.9934	785	36.9934
1922	clonotype1084	IGH	IGHM	Hc	IGHV1-39	None	IGHJ4	CASRGYAMDYW	wt	39	1.83789	1846	86.9934	785	36.9934
1923	clonotype1085	IGH	IGHM	Hc	IGHV1-20	None	IGHJ3	CARSGGYDFAYW	wt	14	0.659755	1846	86.9934	507	23.8926
1924	clonotype1086	IGH	IGHM	Hc	IGHV10-1	None	IGHJ2	CVGGNYVFHYW	wt	46	2.16777	1846	86.9934	519	24.4581
1925	clonotype1087	IGH	IGHM	Hc	IGHV15-2	None	IGHJ1	CARGYYGSSPSYWYFDVW	wt	11	0.518379	1846	86.9934	311	14.656
1926	clonotype1088	IGH	IGHM	Hc	IGHV1-39	None	IGHJ4	CARNDLYAMDYW	wt	39	1.83789	1846	86.9934	785	36.9934
1927	clonotype1089	IGH	IGHM	Hc	IGHV15-2	None	IGHJ2	CARGGEDDYDKRRYYFDYW	wt	11	0.518379	1846	86.9934	519	24.4581
1928	clonotype1091	IGH	IGHM	Hc	IGHV5-16	None	IGHJ2	CARDGGGSSYDYW	wt	28	1.31951	1846	86.9934	519	24.4581
1929	clonotype1092	IGH	None	Hc	IGHV1-42	None	IGHJ4	CAGGDYGSDYYAMDYW	wt	20	0.942507	1846	86.9934	785	36.9934
1930	clonotype1093	IGH	IGHM	Hc	IGHV2-2	None	IGHJ2	CARNEYEGHYFDYW	wt	20	0.942507	1846	86.9934	519	24.4581
1931	clonotype1094	IGH	IGHM	Hc	IGHV3-6	None	IGHJ3	CARDRRLLSWFAYW	wt	158	7.44581	1846	86.9934	507	23.8926
1932	clonotype1095	IGH	IGHM	Hc	IGHV2-6-8	None	IGHJ4	CASGGAMDYW	wt	2	0.0942507	1846	86.9934	785	36.9934
1933	clonotype1096	IGH	IGHM	Hc	IGHV1-69	None	IGHJ2	CARGWLLRDYW	wt	7	0.329877	1846	86.9934	519	24.4581
1934	clonotype1097	IGH	IGHM	Hc	IGHV1-9	IGHD1-1	IGHJ4	CARDFITTVVANEDAMDYW	wt	42	1.97926	195	9.18944	785	36.9934
1935	clonotype1098	IGH	None	Hc	IGHV8-12	None	IGHJ4	CARRAYYSSPYYAMDYW	wt	63	2.9689	1846	86.9934	785	36.9934
1936	clonotype1099	IGH	IGHM	Hc	IGHV1-53	None	IGHJ4	CARRRYYGSSYKDYAMDYW	wt	7	0.329877	1846	86.9934	785	36.9934
1937	clonotype1101	IGH	IGHM	Hc	IGHV7-1	None	IGHJ4	CARDDWDYAMDYW	wt	22	1.03676	1846	86.9934	785	36.9934
1938	clonotype1102	IGH	IGHM	Hc	IGHV8-8	IGHD2-3	IGHJ4	CARIYDGYYAGAMDYW	wt	113	5.32516	16	0.754006	785	36.9934
1939	clonotype1104	IGH	IGHM	Hc	IGHV1-81	None	IGHJ4	CARSDYYGSREDYYAMDYW	wt	27	1.27238	1846	86.9934	785	36.9934
1940	clonotype1105	IGH	IGHM	Hc	IGHV1-31	None	IGHJ4	CARSYGYDSCAMDYW	wt	4	0.188501	1846	86.9934	785	36.9934
1941	clonotype1106	IGH	IGHM	Hc	IGHV1-72	None	IGHJ2	CARYDGYYYYW	wt	11	0.518379	1846	86.9934	519	24.4581
1942	clonotype1107	IGH	IGHM	Hc	IGHV1-39	None	IGHJ4	CARGRYYYAMDDW	wt	39	1.83789	1846	86.9934	785	36.9934
1943	clonotype1108	IGH	IGHM	Hc	IGHV3-6	None	IGHJ2	CARDRGRLPFDYW	wt	158	7.44581	1846	86.9934	519	24.4581
1944	clonotype1109	IGH	IGHM	Hc	IGHV4-1	None	IGHJ4	CARLPTGTRDYAMDYW	wt	39	1.83789	1846	86.9934	785	36.9934
1945	clonotype1110	IGH	IGHM	Hc	IGHV1-19	IGHD2-4	IGHJ4	CARRGIYYDYDGDYYAMDYW	wt	57	2.68615	21	0.989632	785	36.9934
1946	clonotype1111	IGH	IGHM	Hc	IGHV9-4	IGHD1-1	IGHJ2	CARSYYGSSYFDYW	wt	21	0.989632	195	9.18944	519	24.4581
1947	clonotype1112	IGH	IGHM	Hc	IGHV1-26	None	IGHJ2	CARWGTTVVAPYFDYW	wt	174	8.19981	1846	86.9934	519	24.4581
1948	clonotype1113	IGH	IGHM	Hc	IGHV9-2	None	IGHJ4	CARCSYGSSYEYAMDYW	wt	15	0.70688	1846	86.9934	785	36.9934
1949	clonotype1114	IGH	IGHM	Hc	IGHV10-3	None	IGHJ4	CVRNSRGYAMDYW	wt	46	2.16777	1846	86.9934	785	36.9934
1950	clonotype1116	IGH	IGHM	Hc	IGHV10-3	None	IGHJ1	CVRDDYGSRYFDVW	wt	46	2.16777	1846	86.9934	311	14.656
1951	clonotype1117	IGH	IGHM	Hc	IGHV3-6	None	IGHJ4	CARESGSSPIYAMDYW	wt	158	7.44581	1846	86.9934	785	36.9934
1952	clonotype1118	IGH	IGHM	Hc	IGHV7-1	None	IGHJ4	CARDAPYYAMDYW	wt	22	1.03676	1846	86.9934	785	36.9934
1953	clonotype1119	IGH	None	Hc	IGHV1-26	None	IGHJ3	CARGYYYGSPWFAYW	wt	174	8.19981	1846	86.9934	507	23.8926
1954	clonotype1120	IGH	IGHD	Hc	IGHV1-26	None	IGHJ4	CARSYDYDGYYAMDYW	wt	174	8.19981	1846	86.9934	785	36.9934
1955	clonotype1121	IGH	IGHM	Hc	IGHV10-1	None	IGHJ4	CVRPGTTGAMDYW	wt	46	2.16777	1846	86.9934	785	36.9934
1956	clonotype1122	IGH	IGHM	Hc	IGHV1-26	None	IGHJ4	CARGGVIYYDYNYAMDYW	wt	174	8.19981	1846	86.9934	785	36.9934
1957	clonotype1124	IGH	IGHM	Hc	IGHV3-6	None	IGHJ3	CARGGKNGHYGFAYW	wt	158	7.44581	1846	86.9934	507	23.8926
1958	clonotype1125	IGH	IGHM	Hc	IGHV1-76	None	IGHJ4	CARGYSNYVDYAMDYW	wt	16	0.754006	1846	86.9934	785	36.9934
1959	clonotype1126	IGH	IGHM	Hc	IGHV5-6	None	IGHJ3	CARHGLGLAWFAYW	wt	15	0.70688	1846	86.9934	507	23.8926
1960	clonotype1128	IGH	IGHM	Hc	IGHV8-12	None	IGHJ4	CARVGAYSNYAMDYW	wt	63	2.9689	1846	86.9934	785	36.9934
1961	clonotype1129	IGH	IGHM	Hc	IGHV1-85	None	IGHJ2	CARGHYGIFDYW	wt	16	0.754006	1846	86.9934	519	24.4581
1962	clonotype1131	IGH	IGHM	Hc	IGHV1-26	IGHD1-1	IGHJ4	CARYYYGSGYAMDYW	wt	174	8.19981	195	9.18944	785	36.9934
1963	clonotype1133	IGH	IGHM	Hc	IGHV1-26	None	IGHJ2	CARDSSGSYFDYW	wt	174	8.19981	1846	86.9934	519	24.4581
1964	clonotype1134	IGH	IGHM	Hc	IGHV9-3	None	IGHJ2	CARSGDEIDYW	wt	129	6.07917	1846	86.9934	519	24.4581
1965	clonotype1135	IGH	IGHM	Hc	IGHV4-1	None	IGHJ4	CARRYYGSSYWAMDYW	wt	39	1.83789	1846	86.9934	785	36.9934
1966	clonotype1136	IGH	IGHM	Hc	IGHV3-1	None	IGHJ3	CARDYDYDSAWFAYW	wt	16	0.754006	1846	86.9934	507	23.8926
1967	clonotype1138	IGH	IGHM	Hc	IGHV6-6	None	IGHJ1	CTRNYGSRSWYFDVW	wt	65	3.06315	1846	86.9934	311	14.656
1968	clonotype1139	IGH	IGHM	Hc	IGHV8-8	None	IGHJ3	CARMDYYYGSRDW	wt	113	5.32516	1846	86.9934	507	23.8926
1969	clonotype1140	IGH	IGHM	Hc	IGHV9-3	None	IGHJ4	CALLRLDYW	wt	129	6.07917	1846	86.9934	785	36.9934
1970	clonotype1141	IGH	IGHM	Hc	IGHV6-6	None	IGHJ1	CTRNYGSSYWYFDVW	wt	65	3.06315	1846	86.9934	311	14.656
1971	clonotype1142	IGH	IGHM	Hc	IGHV1-26	IGHD1-1	IGHJ4	CARPPFITTVVAKDAMDYW	wt	174	8.19981	195	9.18944	785	36.9934
1972	clonotype1143	IGH	IGHM	Hc	IGHV1-18	None	IGHJ2	CARSKWVVGYFDYW	wt	65	3.06315	1846	86.9934	519	24.4581
1973	clonotype1145	IGH	IGHM	Hc	IGHV6-3	None	IGHJ4	CTTGSSTMDYW	wt	92	4.33553	1846	86.9934	785	36.9934
1974	clonotype1146	IGH	IGHM	Hc	IGHV5-16	None	IGHJ2	CARRTDGYYPYYFDYW	wt	28	1.31951	1846	86.9934	519	24.4581
1975	clonotype1147	IGH	IGHM	Hc	IGHV1-9	None	IGHJ1	CARSTTVVARWYFDVW	wt	42	1.97926	1846	86.9934	311	14.656
1976	clonotype1148	IGH	None	Hc	IGHV1-26	None	IGHJ2	CARSYSNYDYW	wt	174	8.19981	1846	86.9934	519	24.4581
1977	clonotype1149	IGH	None	Hc	IGHV1-19	None	IGHJ3	CASPIYYDYPWFAYW	wt	57	2.68615	1846	86.9934	507	23.8926
1978	clonotype1150	IGH	IGHM	Hc	IGHV9-3	None	IGHJ2	CARGGRGGDYW	wt	129	6.07917	1846	86.9934	519	24.4581
1979	clonotype1151	IGH	IGHM	Hc	IGHV1-75	None	IGHJ2	CARSLSYSPYYFDYW	wt	51	2.40339	1846	86.9934	519	24.4581
1980	clonotype1152	IGH	IGHM	Hc	IGHV1-18	None	IGHJ3	CASYDYGSSPFAYW	wt	65	3.06315	1846	86.9934	507	23.8926
1981	clonotype1155	IGH	IGHM	Hc	IGHV1-11	None	IGHJ3	CGRVGGNWALFAYW	wt	5	0.235627	1846	86.9934	507	23.8926
1982	clonotype1156	IGH	IGHM	Hc	IGHV5-17	None	IGHJ4	CGRYRGAMDYW	wt	26	1.22526	1846	86.9934	785	36.9934
1983	clonotype1157	IGH	IGHM	Hc	IGHV9-1	None	IGHJ4	CVRGSLPQKYYYAMDYW	wt	21	0.989632	1846	86.9934	785	36.9934
1984	clonotype1159	IGH	IGHM	Hc	IGHV1-26	None	IGHJ2	CARGGYSYYFDYW	wt	174	8.19981	1846	86.9934	519	24.4581
1985	clonotype1162	IGH	None	Hc	IGHV14-3	None	IGHJ3	CARSELLRMGFAYW	wt	18	0.848256	1846	86.9934	507	23.8926
1986	clonotype1163	IGH	IGHM	Hc	IGHV1-78	None	IGHJ2	CARWAYGSRGYFDYW	wt	36	1.69651	1846	86.9934	519	24.4581
1987	clonotype1164	IGH	IGHM	Hc	IGHV13-2	None	IGHJ4	CSRSTTVPYYAMDYW	wt	32	1.50801	1846	86.9934	785	36.9934
1988	clonotype1165	IGH	IGHM	Hc	IGHV1-19	None	IGHJ2	CARGGGFDYW	wt	57	2.68615	1846	86.9934	519	24.4581
1989	clonotype1166	IGH	IGHM	Hc	IGHV8-12	None	IGHJ2	CARIYDGYLYYFDYW	wt	63	2.9689	1846	86.9934	519	24.4581
1990	clonotype1167	IGH	IGHM	Hc	IGHV9-2	None	IGHJ3	CARIEDNDGYYGFAYW	wt	15	0.70688	1846	86.9934	507	23.8926
1991	clonotype1168	IGH	IGHM	Hc	IGHV9-3	None	IGHJ1	CARGDYYGSSPYFDVW	wt	129	6.07917	1846	86.9934	311	14.656
1992	clonotype1169	IGH	IGHM	Hc	IGHV5-16	None	IGHJ2	CARDAGLRRGYYFDYW	wt	28	1.31951	1846	86.9934	519	24.4581
1993	clonotype1170	IGH	None	Hc	IGHV9-2	None	IGHJ2	CAKLGDYW	wt	15	0.70688	1846	86.9934	519	24.4581
1994	clonotype1171	IGH	IGHM	Hc	IGHV1-58	None	IGHJ3	CARSGDGYYPFAYW	wt	16	0.754006	1846	86.9934	507	23.8926
1995	clonotype1172	IGH	IGHM	Hc	IGHV6-3	None	IGHJ4	CTPLGHAMDYW	wt	92	4.33553	1846	86.9934	785	36.9934
1996	clonotype1174	IGH	IGHM	Hc	IGHV1-26	None	IGHJ2	CAREGDYGSSGDYW	wt	174	8.19981	1846	86.9934	519	24.4581
1997	clonotype1175	IGH	IGHM	Hc	IGHV1-64	None	IGHJ4	CARGDYSYAMDYW	wt	23	1.08388	1846	86.9934	785	36.9934
1998	clonotype1178	IGH	IGHM	Hc	IGHV5-4	IGHD1-1	IGHJ1	CARDSGVEFITTVVASYWYFDVW	wt	30	1.41376	195	9.18944	311	14.656
1999	clonotype1179	IGH	IGHM	Hc	IGHV1-54	None	IGHJ2	CARGDYVLYYFDYW	wt	21	0.989632	1846	86.9934	519	24.4581
[truncated: 1,973 more rows]

## Sheet: LC
	clonotype_id	chain	c_gene	chain1	v_gene	d_gene	j_gene	cdr3	status	v_count	v_freq	j_count	j_freq
1	clonotype1000	IGK	IGKC	Lc	IGKV1-135	None	IGKJ1	CWQGTHFPRTF	ko	15	3.36323	136	30.4933		All codes and analysis parameters would be provided upon rasonable request
2	clonotype1001	IGK	IGKC	Lc	IGKV2-137	None	IGKJ4	CMQHLEYPFTF	ko	4	0.896861	92	20.6278
3	clonotype1004	IGK	IGKC	Lc	IGKV8-27	None	IGKJ5	CHQYLSSLTF	ko	8	1.79372	99	22.1973
4	clonotype1005	IGK	IGKC	Lc	IGKV9-120	None	IGKJ5	CLQYASSPLTF	ko	6	1.34529	99	22.1973
5	clonotype1006	IGK	IGKC	Lc	IGKV6-17	None	IGKJ2	CQQHYSTPYTF	ko	4	0.896861	110	24.6637
6	clonotype1007	IGK	IGKC	Lc	IGKV12-46	None	IGKJ1	CQHFWGTPWTF	ko	7	1.56951	136	30.4933
7	clonotype1008	IGK	IGKC	Lc	IGKV10-96	None	IGKJ2	CQQGNTLPYTF	ko	13	2.9148	110	24.6637
8	clonotype1009	IGK	IGKC	Lc	IGKV1-110	None	IGKJ2	CSQSTHVPYTF	ko	10	2.24215	110	24.6637
9	clonotype1010	IGK	IGKC	Lc	IGKV5-39	None	IGKJ1	CQNGHSFPWTF	ko	5	1.12108	136	30.4933
10	clonotype1011	IGK	IGKC	Lc	IGKV2-109	None	IGKJ2	CAQNLELPYTF	ko	11	2.46637	110	24.6637
11	clonotype1012	IGK	IGKC	Lc	IGKV1-117	None	IGKJ4	CFQGSHVPFTF	ko	7	1.56951	92	20.6278
12	clonotype1014	IGK	IGKC	Lc	IGKV6-25	None	IGKJ1	CQQHYSTPRTF	ko	3	0.672646	136	30.4933
13	clonotype1015	IGK	IGKC	Lc	IGKV12-41	None	IGKJ5	CQHFWSTPLTF	ko	9	2.01794	99	22.1973
14	clonotype1016	IGK	IGKC	Lc	IGKV17-121	None	IGKJ4	CLQSDNLPIFTF	ko	7	1.56951	92	20.6278
15	clonotype1018	IGK	IGKC	Lc	IGKV8-30	None	IGKJ4	CQQYYSYPFTF	ko	10	2.24215	92	20.6278
16	clonotype1022	IGK	IGKC	Lc	IGKV6-15	None	IGKJ4	CQQYNSYPFTF	ko	10	2.24215	92	20.6278
17	clonotype1023	IGK	IGKC	Lc	IGKV12-41	None	IGKJ1	CQHFWSTPWTF	ko	9	2.01794	136	30.4933
18	clonotype1025	IGK	IGKC	Lc	IGKV8-28	None	IGKJ4	CQNDHSYPLTF	ko	4	0.896861	92	20.6278
19	clonotype1026	IGK	IGKC	Lc	IGKV12-46	None	IGKJ5	CQHFWGTPLTF	ko	7	1.56951	99	22.1973
20	clonotype1027	IGK	IGKC	Lc	IGKV4-53	None	IGKJ5	CQQWSSYPLTF	ko	3	0.672646	99	22.1973
21	clonotype1028	IGK	IGKC	Lc	IGKV6-23	None	IGKJ1	CQQYSSYPWTF	ko	13	2.9148	136	30.4933
22	clonotype1029	IGK	IGKC	Lc	IGKV3-10	None	IGKJ1	CQQNNEDPRTF	ko	8	1.79372	136	30.4933
23	clonotype1031	IGK	IGKC	Lc	IGKV10-96	None	IGKJ1	CQQGNTLPWTF	ko	13	2.9148	136	30.4933
24	clonotype1032	IGK	IGKC	Lc	IGKV8-24	None	IGKJ1	CQQHYSTPWTF	ko	4	0.896861	136	30.4933
25	clonotype1033	IGK	IGKC	Lc	IGKV8-21	None	IGKJ2	CKQSYNLYTF	ko	7	1.56951	110	24.6637
26	clonotype1034	IGK	IGKC	Lc	IGKV3-12	None	IGKJ5	CQHSRELPLTF	ko	8	1.79372	99	22.1973
27	clonotype1035	IGK	IGKC	Lc	IGKV4-59	None	IGKJ4	CQQWSSNPFTF	ko	7	1.56951	92	20.6278
28	clonotype1037	IGK	IGKC	Lc	IGKV8-27	None	IGKJ2	CHQYLSSYTF	ko	8	1.79372	110	24.6637
29	clonotype1038	IGK	IGKC	Lc	IGKV5-39	None	IGKJ2	CQNGHSFPYTF	ko	5	1.12108	110	24.6637
30	clonotype1039	IGK	IGKC	Lc	IGKV13-84	None	IGKJ1	CQQYWSTPWTF	ko	8	1.79372	136	30.4933
31	clonotype1040	IGK	IGKC	Lc	IGKV3-10	None	IGKJ1	CQQNNEDPTWTF	ko	8	1.79372	136	30.4933
32	clonotype1043	IGK	IGKC	Lc	IGKV8-28	None	IGKJ1	CQNDHSYPRTF	ko	4	0.896861	136	30.4933
33	clonotype1046	IGK	IGKC	Lc	IGKV1-135	None	IGKJ1	CWQGTHFPQTF	ko	15	3.36323	136	30.4933
34	clonotype1048	IGK	IGKC	Lc	IGKV4-57	None	IGKJ2	CQQRSSYPPTF	ko	7	1.56951	110	24.6637
35	clonotype1054	IGK	IGKC	Lc	IGKV4-53	None	IGKJ4	CQQWSSYPFTF	ko	3	0.672646	92	20.6278
36	clonotype1058	IGK	IGKC	Lc	IGKV9-120	None	IGKJ1	CLQYASSPWTF	ko	6	1.34529	136	30.4933
37	clonotype1060	IGK	IGKC	Lc	IGKV1-117	None	IGKJ2	CFQGSHVPYTF	ko	7	1.56951	110	24.6637
38	clonotype1062	IGK	IGKC	Lc	IGKV1-117	None	IGKJ1	CFQGSHVPPTF	ko	7	1.56951	136	30.4933
39	clonotype1064	IGK	IGKC	Lc	IGKV17-127	None	IGKJ5	CLQSDNMPLTF	ko	4	0.896861	99	22.1973
40	clonotype1065	IGK	IGKC	Lc	IGKV3-12	None	IGKJ2	CQHSRELPYTF	ko	8	1.79372	110	24.6637
41	clonotype1066	IGK	IGKC	Lc	IGKV12-44	None	IGKJ5	CQHHYGTPLTF	ko	5	1.12108	99	22.1973
42	clonotype1067	IGK	IGKC	Lc	IGKV1-117	None	IGKJ1	CFQGSHVPWTF	ko	7	1.56951	136	30.4933
43	clonotype1069	IGK	IGKC	Lc	IGKV1-110	None	IGKJ1	CSQSTHVPPWTF	ko	10	2.24215	136	30.4933
44	clonotype1071	IGK	IGKC	Lc	IGKV9-124	None	IGKJ1	CLQYASYPPTF	ko	8	1.79372	136	30.4933
45	clonotype1072	IGK	IGKC	Lc	IGKV4-72	None	IGKJ5	CQQWSSNPLTF	ko	3	0.672646	99	22.1973
46	clonotype1074	IGK	IGKC	Lc	IGKV6-14	None	IGKJ5	CLQHWNYPLTF	ko	4	0.896861	99	22.1973
47	clonotype1075	IGK	IGKC	Lc	IGKV4-74	None	IGKJ2	CHQYHRSPYMYTF	ko	6	1.34529	110	24.6637
48	clonotype1076	IGK	IGKC	Lc	IGKV14-100	None	IGKJ2	CVQYAQFPYTF	ko	3	0.672646	110	24.6637
49	clonotype1077	IGK	IGKC	Lc	IGKV6-32	None	IGKJ4	CQQDYSSPFTF	ko	9	2.01794	92	20.6278
50	clonotype1078	IGK	IGKC	Lc	IGKV9-120	None	IGKJ5	CLQYASSPPTF	ko	6	1.34529	99	22.1973
51	clonotype1079	IGK	IGKC	Lc	IGKV6-23	None	IGKJ5	CQQYSSYPLTF	ko	13	2.9148	99	22.1973
52	clonotype1082	IGK	IGKC	Lc	IGKV1-135	None	IGKJ2	CWQGTHFPYTF	ko	15	3.36323	110	24.6637
53	clonotype1085	IGK	IGKC	Lc	IGKV4-59	None	IGKJ4	CQQWSSNPPTF	ko	7	1.56951	92	20.6278
54	clonotype1087	IGK	IGKC	Lc	IGKV8-27	None	IGKJ1	CHQYLSSWTF	ko	8	1.79372	136	30.4933
55	clonotype1088	IGK	IGKC	Lc	IGKV3-7	None	IGKJ5	CQHSWEIPLTF	ko	4	0.896861	99	22.1973
56	clonotype1090	IGK	IGKC	Lc	IGKV1-88	None	IGKJ2	CLQGTHQPYTF	ko	7	1.56951	110	24.6637
57	clonotype1092	IGK	IGKC	Lc	IGKV17-127	None	IGKJ2	CLQSDNMPYTF	ko	4	0.896861	110	24.6637
58	clonotype1094	IGK	IGKC	Lc	IGKV13-84	None	IGKJ1	CQQYWSTQTF	ko	8	1.79372	136	30.4933
59	clonotype1095	IGK	IGKC	Lc	IGKV19-93	None	IGKJ2	CLQYDNLYTF	ko	16	3.58744	110	24.6637
60	clonotype1096	IGK	IGKC	Lc	IGKV3-4	None	IGKJ1	CQQSNEDPRTF	ko	6	1.34529	136	30.4933
61	clonotype1099	IGL	IGLC3	Lc	IGLV1	None	IGLJ3	CALWYSNHFIF	ko	7	1.56951	3	0.672646
62	clonotype1102	IGK	IGKC	Lc	IGKV5-48	None	IGKJ5	CQQSNSWPLTF	ko	7	1.56951	99	22.1973
63	clonotype1106	IGK	IGKC	Lc	IGKV4-86	None	IGKJ2	CQQWNYPLITF	ko	5	1.12108	110	24.6637
64	clonotype1107	IGK	IGKC	Lc	IGKV6-25	None	IGKJ4	CQQHYSTPFTF	ko	3	0.672646	92	20.6278
65	clonotype1108	IGK	IGKC	Lc	IGKV8-30	None	IGKJ5	CQQYYSYLTF	ko	10	2.24215	99	22.1973
66	clonotype1111	IGK	IGKC	Lc	IGKV17-121	None	IGKJ2	CLQSDNLPYTF	ko	7	1.56951	110	24.6637
67	clonotype1118	IGK	IGKC	Lc	IGKV15-103	None	IGKJ5	CQQGQSYPLTF	ko	5	1.12108	99	22.1973
68	clonotype1122	IGK	IGKC	Lc	IGKV8-30	None	IGKJ5	CQQYYSYPLTF	ko	10	2.24215	99	22.1973
69	clonotype1124	IGK	IGKC	Lc	IGKV1-88	None	IGKJ1	CLQGTHQPWTF	ko	7	1.56951	136	30.4933
70	clonotype1128	IGK	IGKC	Lc	IGKV1-117	None	IGKJ1	CFQGSHVPRTF	ko	7	1.56951	136	30.4933
71	clonotype1132	IGK	IGKC	Lc	IGKV13-85	None	IGKJ2	CQQYWSTPYTF	ko	2	0.44843	110	24.6637
72	clonotype1142	IGK	IGKC	Lc	IGKV6-15	None	IGKJ5	CQQYNSYPLTF	ko	10	2.24215	99	22.1973
73	clonotype1148	IGK	IGKC	Lc	IGKV3-4	None	IGKJ5	CQQSNEDPLTF	ko	6	1.34529	99	22.1973
74	clonotype1150	IGK	IGKC	Lc	IGKV12-44	None	IGKJ4	CQHHYGTPFTF	ko	5	1.12108	92	20.6278
75	clonotype1152	IGK	IGKC	Lc	IGKV4-79	None	IGKJ4	CHQWSSYPFTF	ko	3	0.672646	92	20.6278
76	clonotype1158	IGK	IGKC	Lc	IGKV1-117	None	IGKJ5	CFQGSHVPLTF	ko	7	1.56951	99	22.1973
77	clonotype1160	IGK	IGKC	Lc	IGKV17-121	None	IGKJ4	CLQSDNLPFTF	ko	7	1.56951	92	20.6278
78	clonotype1164	IGK	IGKC	Lc	IGKV8-19	None	IGKJ2	CQNDYSYPYTF	ko	5	1.12108	110	24.6637
79	clonotype1165	IGK	IGKC	Lc	IGKV5-43	None	IGKJ5	CQQSNSWPHTF	ko	7	1.56951	99	22.1973
80	clonotype1167	IGK	IGKC	Lc	IGKV8-21	None	IGKJ1	CKQSYNLRTF	ko	7	1.56951	136	30.4933
81	clonotype1172	IGK	IGKC	Lc	IGKV6-20	None	IGKJ5	CGQSYSYPTF	ko	7	1.56951	99	22.1973
82	clonotype1174	IGK	IGKC	Lc	IGKV1-135	None	IGKJ4	CWQGTHFPFTF	ko	15	3.36323	92	20.6278
83	clonotype1182	IGK	IGKC	Lc	IGKV17-121	None	IGKJ5	CLQSDNLPLTF	ko	7	1.56951	99	22.1973
84	clonotype1186	IGK	IGKC	Lc	IGKV1-135	None	IGKJ1	CWQGTHFPWTF	ko	15	3.36323	136	30.4933
85	clonotype1188	IGK	IGKC	Lc	IGKV4-68	None	IGKJ2	CQQWSSNPYTF	ko	4	0.896861	110	24.6637
86	clonotype1189	IGL	IGLC2	Lc	IGLV3	None	IGLJ2	CGVGDTIKEQFVYVF	ko	1	0.224215	2	0.44843
87	clonotype1191	IGK	IGKC	Lc	IGKV1-110	None	IGKJ1	CSQSTHVPRTF	ko	10	2.24215	136	30.4933
88	clonotype1194	IGK	IGKC	Lc	IGKV8-30	None	IGKJ2	CQQYYSYPYTF	ko	10	2.24215	110	24.6637
89	clonotype1197	IGK	IGKC	Lc	IGKV17-127	None	IGKJ4	CLQSDNMPFTF	ko	4	0.896861	92	20.6278
90	clonotype1198	IGK	IGKC	Lc	IGKV4-50	None	IGKJ5	CQQFTSSPSTF	ko	8	1.79372	99	22.1973
91	clonotype1199	IGK	IGKC	Lc	IGKV6-20	None	IGKJ4	CGQSYSYPFTF	ko	7	1.56951	92	20.6278
92	clonotype1202	IGK	IGKC	Lc	IGKV13-85	None	IGKJ4	CQQYWSTPPTF	ko	2	0.44843	92	20.6278
93	clonotype1203	IGK	IGKC	Lc	IGKV14-126	None	IGKJ2	CLQHGESPYTF	ko	6	1.34529	110	24.6637
94	clonotype1204	IGK	IGKC	Lc	IGKV3-4	None	IGKJ4	CQQSNEDPFTF	ko	6	1.34529	92	20.6278
95	clonotype1206	IGK	IGKC	Lc	IGKV5-48	None	IGKJ5	CQQSNSWPTTF	ko	7	1.56951	99	22.1973
96	clonotype1209	IGK	IGKC	Lc	IGKV4-57	None	IGKJ5	CQQRSSYPLTF	ko	7	1.56951	99	22.1973
97	clonotype1210	IGK	IGKC	Lc	IGKV1-133	None	IGKJ2	CVQGTHFPHTF	ko	5	1.12108	110	24.6637
98	clonotype1214	IGK	IGKC	Lc	IGKV6-20	None	IGKJ1	CGQSYSYPWTF	ko	7	1.56951	136	30.4933
99	clonotype1220	IGK	IGKC	Lc	IGKV4-74	None	IGKJ5	CHQYHRSPLTF	ko	6	1.34529	99	22.1973
100	clonotype1228	IGK	IGKC	Lc	IGKV6-23	None	IGKJ4	CQQYSSYPFTF	ko	13	2.9148	92	20.6278
101	clonotype1230	IGK	IGKC	Lc	IGKV5-45	None	IGKJ1	CQQSNSWPWTF	ko	2	0.44843	136	30.4933
102	clonotype1237	IGK	IGKC	Lc	IGKV4-50	None	IGKJ1	CQQFTSSPWTF	ko	8	1.79372	136	30.4933
103	clonotype1245	IGK	IGKC	Lc	IGKV4-74	None	IGKJ1	CHQYHRSPPTWTF	ko	6	1.34529	136	30.4933
104	clonotype1252	IGK	IGKC	Lc	IGKV14-130	None	IGKJ4	CLQFYEFPFTF	ko	3	0.672646	92	20.6278
105	clonotype1255	IGK	IGKC	Lc	IGKV10-94	None	IGKJ1	CQQYSKLPWTF	ko	8	1.79372	136	30.4933
106	clonotype1257	IGK	IGKC	Lc	IGKV14-111	None	IGKJ5	CLQYDEFPLTF	ko	14	3.13901	99	22.1973
107	clonotype1260	IGK	IGKC	Lc	IGKV19-93	None	IGKJ1	CLQYDNLWTF	ko	16	3.58744	136	30.4933
108	clonotype1262	IGK	IGKC	Lc	IGKV2-109	None	IGKJ1	CAQNLELPPTF	ko	11	2.46637	136	30.4933
109	clonotype1264	IGK	IGKC	Lc	IGKV6-23	None	IGKJ2	CQQYSSYPYTF	ko	13	2.9148	110	24.6637
110	clonotype1265	IGK	IGKC	Lc	IGKV4-58	None	IGKJ5	CQQWSGYPLTF	ko	3	0.672646	99	22.1973
111	clonotype1267	IGK	IGKC	Lc	IGKV6-32	None	IGKJ5	CQQDYSSPPTF	ko	9	2.01794	99	22.1973
112	clonotype1268	IGK	IGKC	Lc	IGKV3-2	None	IGKJ4	CQQSKEVPFTF	ko	7	1.56951	92	20.6278
113	clonotype1274	IGK	IGKC	Lc	IGKV12-46	None	IGKJ1	CQHFWGTTWTF	ko	7	1.56951	136	30.4933
114	clonotype1279	IGK	IGKC	Lc	IGKV3-7	None	IGKJ2	CQHSWEIPYTF	ko	4	0.896861	110	24.6637
115	clonotype1280	IGK	IGKC	Lc	IGKV3-4	None	IGKJ1	CQQSNEDPWTF	ko	6	1.34529	136	30.4933
116	clonotype1284	IGL	IGLC2	Lc	IGLV2	None	IGLJ2	CALWYSTHYVF	ko	1	0.224215	2	0.44843
117	clonotype1285	IGK	IGKC	Lc	IGKV4-61	None	IGKJ5	CQQYHSYPPTF	ko	4	0.896861	99	22.1973
118	clonotype1288	IGK	IGKC	Lc	IGKV10-96	None	IGKJ1	CQQGNTLPPTF	ko	13	2.9148	136	30.4933
119	clonotype1291	IGK	IGKC	Lc	IGKV1-110	None	IGKJ2	CSQSTHVPPYTF	ko	10	2.24215	110	24.6637
120	clonotype1293	IGK	IGKC	Lc	IGKV10-94	None	IGKJ2	CQQYSKLPYTF	ko	8	1.79372	110	24.6637
121	clonotype1295	IGL	IGLC1	Lc	IGLV1	None	IGLJ1	CALWYSNHWVF	ko	7	1.56951	4	0.896861
122	clonotype1296	IGK	IGKC	Lc	IGKV4-59	None	IGKJ4	CQQWSSNPIFTF	ko	7	1.56951	92	20.6278
123	clonotype1300	IGK	IGKC	Lc	IGKV12-46	None	IGKJ2	CQHFWGTPYTF	ko	7	1.56951	110	24.6637
124	clonotype1304	IGK	IGKC	Lc	IGKV3-2	None	IGKJ1	CQQSKEVPWTF	ko	7	1.56951	136	30.4933
125	clonotype1306	IGK	IGKC	Lc	IGKV2-109	None	IGKJ5	CAQNLELPLTF	ko	11	2.46637	99	22.1973
126	clonotype1308	IGK	IGKC	Lc	IGKV19-93	None	IGKJ4	CLQYDNLLTF	ko	16	3.58744	92	20.6278
127	clonotype1309	IGK	IGKC	Lc	IGKV9-120	None	IGKJ1	CLQYASSPRTF	ko	6	1.34529	136	30.4933
128	clonotype1318	IGK	IGKC	Lc	IGKV6-32	None	IGKJ2	CQQDYSSPYTF	ko	9	2.01794	110	24.6637
129	clonotype1319	IGK	IGKC	Lc	IGKV3-5	None	IGKJ2	CQQSNEDPYTF	ko	1	0.224215	110	24.6637
130	clonotype1321	IGK	IGKC	Lc	IGKV12-44	None	IGKJ2	CQHHYGTPYTF	ko	5	1.12108	110	24.6637
131	clonotype1323	IGK	IGKC	Lc	IGKV12-41	None	IGKJ4	CQHFWSTPFTF	ko	9	2.01794	92	20.6278
132	clonotype1327	IGK	IGKC	Lc	IGKV4-50	None	IGKJ4	CQQFTSSPFTF	ko	8	1.79372	92	20.6278
133	clonotype1330	IGK	IGKC	Lc	IGKV19-93	None	IGKJ2	CLQYDNLLYTF	ko	16	3.58744	110	24.6637
134	clonotype1332	IGK	IGKC	Lc	IGKV5-39	None	IGKJ5	CQNGHSFPLTF	ko	5	1.12108	99	22.1973
135	clonotype1334	IGK	IGKC	Lc	IGKV10-94	None	IGKJ4	CQQYSKLPFTF	ko	8	1.79372	92	20.6278
136	clonotype1335	IGK	IGKC	Lc	IGKV5-48	None	IGKJ5	CQQSNSWLTF	ko	7	1.56951	99	22.1973
137	clonotype1340	IGK	IGKC	Lc	IGKV5-43	None	IGKJ1	CQQSNSWPHWTF	ko	7	1.56951	136	30.4933
138	clonotype1341	IGK	IGKC	Lc	IGKV14-111	None	IGKJ2	CLQYDEFPYTF	ko	14	3.13901	110	24.6637
139	clonotype1344	IGK	IGKC	Lc	IGKV10-96	None	IGKJ1	CQQGNTLPRTF	ko	13	2.9148	136	30.4933
140	clonotype1345	IGK	IGKC	Lc	IGKV10-96	None	IGKJ1	CQQGNTLWTF	ko	13	2.9148	136	30.4933
141	clonotype1349	IGK	IGKC	Lc	IGKV4-57-1	None	IGKJ2	CQQYSGYPLTF	ko	4	0.896861	110	24.6637
142	clonotype1351	IGK	IGKC	Lc	IGKV6-15	None	IGKJ4	CQQYNSYPLFTF	ko	10	2.24215	92	20.6278
143	clonotype1352	IGK	IGKC	Lc	IGKV9-124	None	IGKJ2	CLQYASYPMYTF	ko	8	1.79372	110	24.6637
144	clonotype1353	IGK	IGKC	Lc	IGKV19-93	None	IGKJ1	CLQYDNLLRTF	ko	16	3.58744	136	30.4933
145	clonotype1354	IGK	IGKC	Lc	IGKV4-61	None	IGKJ5	CQQYHSYPLTF	ko	4	0.896861	99	22.1973
146	clonotype1355	IGK	IGKC	Lc	IGKV9-120	None	IGKJ2	CLQYASSPYTF	ko	6	1.34529	110	24.6637
147	clonotype1356	IGK	IGKC	Lc	IGKV19-93	None	IGKJ5	CLQYDNLPLTF	ko	16	3.58744	99	22.1973
148	clonotype1359	IGK	IGKC	Lc	IGKV6-32	None	IGKJ1	CQQDYSSPWTF	ko	9	2.01794	136	30.4933
149	clonotype1362	IGK	IGKC	Lc	IGKV5-48	None	IGKJ2	CQQSNSWPYTF	ko	7	1.56951	110	24.6637
150	clonotype1363	IGK	IGKC	Lc	IGKV4-53	None	IGKJ1	CQQWSSYPLMRTF	ko	3	0.672646	136	30.4933
151	clonotype1369	IGK	IGKC	Lc	IGKV14-111	None	IGKJ1	CLQYDEFPWTF	ko	14	3.13901	136	30.4933
152	clonotype1372	IGK	IGKC	Lc	IGKV6-20	None	IGKJ1	CGQSYSYPPTF	ko	7	1.56951	136	30.4933
153	clonotype1376	IGK	IGKC	Lc	IGKV2-137	None	IGKJ1	CMQHLEYPWTF	ko	4	0.896861	136	30.4933
154	clonotype1384	IGK	IGKC	Lc	IGKV8-19	None	IGKJ4	CQNDYSYPFTF	ko	5	1.12108	92	20.6278
155	clonotype1385	IGK	IGKC	Lc	IGKV8-30	None	IGKJ2	CQQYYSYPPTF	ko	10	2.24215	110	24.6637
156	clonotype1389	IGK	IGKC	Lc	IGKV6-15	None	IGKJ2	CQQYNSYPYTF	ko	10	2.24215	110	24.6637
157	clonotype1390	IGK	IGKC	Lc	IGKV14-100	None	IGKJ1	CVQYAQFPWTF	ko	3	0.672646	136	30.4933
158	clonotype1400	IGK	IGKC	Lc	IGKV1-110	None	IGKJ1	CSQSTHVPPTF	ko	10	2.24215	136	30.4933
159	clonotype1405	IGK	IGKC	Lc	IGKV1-135	None	IGKJ5	CWQGTHFPLTF	ko	15	3.36323	99	22.1973
160	clonotype1408	IGK	IGKC	Lc	IGKV2-137	None	IGKJ2	CMQHLEYPYTF	ko	4	0.896861	110	24.6637
161	clonotype1414	IGK	IGKC	Lc	IGKV3-10	None	IGKJ1	CQQNNEDPWTF	ko	8	1.79372	136	30.4933
162	clonotype1415	IGK	IGKC	Lc	IGKV1-135	None	IGKJ2	CWQGTHFPHTF	ko	15	3.36323	110	24.6637
163	clonotype1418	IGK	IGKC	Lc	IGKV19-93	None	IGKJ1	CLQYDNLRTF	ko	16	3.58744	136	30.4933
164	clonotype1422	IGK	IGKC	Lc	IGKV9-124	None	IGKJ1	CLQYASYPWTF	ko	8	1.79372	136	30.4933
165	clonotype1425	IGK	IGKC	Lc	IGKV10-94	None	IGKJ5	CQQYSKLPLTF	ko	8	1.79372	99	22.1973
166	clonotype1426	IGK	IGKC	Lc	IGKV14-111	None	IGKJ1	CLQYDEFPRTF	ko	14	3.13901	136	30.4933
167	clonotype1428	IGK	IGKC	Lc	IGKV13-84	None	IGKJ2	CQQYWSTPTF	ko	8	1.79372	110	24.6637
168	clonotype1431	IGK	IGKC	Lc	IGKV8-28	None	IGKJ4	CQNDHSYPFTF	ko	4	0.896861	92	20.6278
169	clonotype1435	IGK	IGKC	Lc	IGKV19-93	None	IGKJ1	CLQYDNLLWTF	ko	16	3.58744	136	30.4933
170	clonotype1438	IGK	IGKC	Lc	IGKV10-96	None	IGKJ4	CQQGNTLPLTF	ko	13	2.9148	92	20.6278
171	clonotype1440	IGK	IGKC	Lc	IGKV1-88	None	IGKJ2	CLQGTHQPPTF	ko	7	1.56951	110	24.6637
172	clonotype1441	IGK	IGKC	Lc	IGKV4-58	None	IGKJ4	CQQWSGYPFTF	ko	3	0.672646	92	20.6278
173	clonotype1446	IGK	IGKC	Lc	IGKV10-96	None	IGKJ1	CQQGNTLRTF	ko	13	2.9148	136	30.4933
174	clonotype1449	IGK	IGKC	Lc	IGKV4-57	None	IGKJ2	CQQRSSYPYTF	ko	7	1.56951	110	24.6637
175	clonotype1451	IGK	IGKC	Lc	IGKV8-27	None	IGKJ4	CHQYLSSRTF	ko	8	1.79372	92	20.6278
176	clonotype1458	IGK	IGKC	Lc	IGKV8-28	None	IGKJ2	CQNDHSYPYTF	ko	4	0.896861	110	24.6637
177	clonotype1462	IGK	IGKC	Lc	IGKV16-104	None	IGKJ2	CQQHNEYPYTF	ko	4	0.896861	110	24.6637
178	clonotype1463	IGK	IGKC	Lc	IGKV14-111	None	IGKJ2	CLQYDELYTF	ko	14	3.13901	110	24.6637
179	clonotype1467	IGK	IGKC	Lc	IGKV3-12	None	IGKJ4	CQHSRELPFTF	ko	8	1.79372	92	20.6278
180	clonotype1471	IGK	IGKC	Lc	IGKV5-39	None	IGKJ4	CQNGHSFPPTF	ko	5	1.12108	92	20.6278
181	clonotype1490	IGK	IGKC	Lc	IGKV13-84	None	IGKJ5	CQQYWSTPLTF	ko	8	1.79372	99	22.1973
182	clonotype1491	IGK	IGKC	Lc	IGKV1-99	None	IGKJ4	CFQSNYLIFTF	ko	2	0.44843	92	20.6278
183	clonotype1515	IGK	IGKC	Lc	IGKV12-44	None	IGKJ1	CQHHYGTPPTF	ko	5	1.12108	136	30.4933
184	clonotype1519	IGK	IGKC	Lc	IGKV5-39	None	IGKJ4	CQNGHSFPFTF	ko	5	1.12108	92	20.6278
185	clonotype1520	IGK	IGKC	Lc	IGKV6-14	None	IGKJ1	CLQHWNYPWTF	ko	4	0.896861	136	30.4933
186	clonotype1523	IGK	IGKC	Lc	IGKV1-110	None	IGKJ4	CSQSTHVPFTF	ko	10	2.24215	92	20.6278
187	clonotype1527	IGK	IGKC	Lc	IGKV19-93	None	IGKJ1	CLQYDNLPWTF	ko	16	3.58744	136	30.4933
188	clonotype1528	IGK	IGKC	Lc	IGKV12-41	None	IGKJ2	CQHFWSTPYTF	ko	9	2.01794	110	24.6637
189	clonotype1536	IGK	IGKC	Lc	IGKV4-55	None	IGKJ1	CQQWSSYPPTF	ko	3	0.672646	136	30.4933
190	clonotype1545	IGK	IGKC	Lc	IGKV2-112	None	IGKJ2	CQQLVEYPYTF	ko	2	0.44843	110	24.6637
191	clonotype1546	IGK	IGKC	Lc	IGKV4-70	None	IGKJ4	CHQRSSYPCTF	ko	5	1.12108	92	20.6278
192	clonotype1566	IGK	IGKC	Lc	IGKV4-57	None	IGKJ1	CQQRSSYPWTF	ko	7	1.56951	136	30.4933
193	clonotype1568	IGK	IGKC	Lc	IGKV8-24	None	IGKJ4	CQQHYSTPTF	ko	4	0.896861	92	20.6278
194	clonotype1570	IGK	IGKC	Lc	IGKV2-112	None	IGKJ4	CQQLVEYPFTF	ko	2	0.44843	92	20.6278
195	clonotype1579	IGK	IGKC	Lc	IGKV4-57-1	None	IGKJ1	CQQYSGYWTF	ko	4	0.896861	136	30.4933
196	clonotype1591	IGK	IGKC	Lc	IGKV12-41	None	IGKJ1	CQHFWSTPRTF	ko	9	2.01794	136	30.4933
197	clonotype1592	IGK	IGKC	Lc	IGKV14-111	None	IGKJ4	CLQYDEFPIFTF	ko	14	3.13901	92	20.6278
198	clonotype1593	IGK	IGKC	Lc	IGKV12-41	None	IGKJ1	CQHFWSTTWTF	ko	9	2.01794	136	30.4933
199	clonotype1601	IGK	IGKC	Lc	IGKV8-19	None	IGKJ5	CQNDYSYPLTF	ko	5	1.12108	99	22.1973
200	clonotype1605	IGL	IGLC1	Lc	IGLV1	None	IGLJ1	CALWYSNHFWVF	ko	7	1.56951	4	0.896861
201	clonotype1613	IGK	IGKC	Lc	IGKV12-89	None	IGKJ1	CQNVLSTPWTF	ko	4	0.896861	136	30.4933
202	clonotype1620	IGK	IGKC	Lc	IGKV6-14	None	IGKJ4	CLQHWNYPFTF	ko	4	0.896861	92	20.6278
203	clonotype1622	IGK	IGKC	Lc	IGKV1-99	None	IGKJ2	CFQSNYLPYTF	ko	2	0.44843	110	24.6637
204	clonotype1624	IGK	IGKC	Lc	IGKV12-38	None	IGKJ4	CKQAYDVPFTF	ko	3	0.672646	92	20.6278
205	clonotype1627	IGK	IGKC	Lc	IGKV1-110	None	IGKJ5	CSQSTHVPLTF	ko	10	2.24215	99	22.1973
206	clonotype1628	IGK	IGKC	Lc	IGKV16-104	None	IGKJ1	CQQHNEYPWTF	ko	4	0.896861	136	30.4933
207	clonotype1629	IGK	IGKC	Lc	IGKV1-110	None	IGKJ1	CSQSTHVPWTF	ko	10	2.24215	136	30.4933
208	clonotype1640	IGK	IGKC	Lc	IGKV4-58	None	IGKJ2	CQQWSGYPYTF	ko	3	0.672646	110	24.6637
209	clonotype1643	IGK	IGKC	Lc	IGKV8-21	None	IGKJ4	CKQSYNLFTF	ko	7	1.56951	92	20.6278
210	clonotype1654	IGK	IGKC	Lc	IGKV6-15	None	IGKJ2	CQQYNSYPTF	ko	10	2.24215	110	24.6637
211	clonotype1655	IGK	IGKC	Lc	IGKV1-88	None	IGKJ5	CLQGTHQPLTF	ko	7	1.56951	99	22.1973
212	clonotype1656	IGK	IGKC	Lc	IGKV5-48	None	IGKJ2	CQQSNSWYTF	ko	7	1.56951	110	24.6637
213	clonotype1664	IGK	IGKC	Lc	IGKV15-103	None	IGKJ2	CQQGQSYPYTF	ko	5	1.12108	110	24.6637
214	clonotype1668	IGK	IGKC	Lc	IGKV19-93	None	IGKJ4	CLQYDNLLFTF	ko	16	3.58744	92	20.6278
215	clonotype1669	IGK	IGKC	Lc	IGKV3-2	None	IGKJ2	CQQSKEVPYTF	ko	7	1.56951	110	24.6637
216	clonotype1672	IGK	IGKC	Lc	IGKV4-91	None	IGKJ4	CQQGSSIPRTF	ko	4	0.896861	92	20.6278
217	clonotype1678	IGK	IGKC	Lc	IGKV14-111	None	IGKJ2	CLQYDEFPPYTF	ko	14	3.13901	110	24.6637
218	clonotype1679	IGK	IGKC	Lc	IGKV4-57	None	IGKJ4	CQQRSSYPFTF	ko	7	1.56951	92	20.6278
219	clonotype1682	IGK	IGKC	Lc	IGKV16-104	None	IGKJ4	CQQHNEYPFTF	ko	4	0.896861	92	20.6278
220	clonotype1699	IGK	IGKC	Lc	IGKV4-54	None	IGKJ4	CQQYHSYPFTF	ko	1	0.224215	92	20.6278
221	clonotype1704	IGK	IGKC	Lc	IGKV19-93	None	IGKJ5	CLQYDNLLLTF	ko	16	3.58744	99	22.1973
222	clonotype1711	IGK	IGKC	Lc	IGKV4-61	None	IGKJ1	CQQYHSYPTF	ko	4	0.896861	136	30.4933
223	clonotype1713	IGK	IGKC	Lc	IGKV7-33	None	IGKJ4	CAQFYSYPFTF	ko	1	0.224215	92	20.6278
224	clonotype1716	IGK	IGKC	Lc	IGKV1-122	None	IGKJ1	CLQVTHVPWTF	ko	2	0.44843	136	30.4933
225	clonotype1717	IGK	IGKC	Lc	IGKV1-135	None	IGKJ2	CWQGTHFMYTF	ko	15	3.36323	110	24.6637
226	clonotype1720	IGK	IGKC	Lc	IGKV4-63	None	IGKJ5	CFQGSGYPLTF	ko	3	0.672646	99	22.1973
227	clonotype1727	IGK	IGKC	Lc	IGKV14-126	None	IGKJ4	CLQHGESPFTF	ko	6	1.34529	92	20.6278
228	clonotype1728	IGK	IGKC	Lc	IGKV1-135	None	IGKJ5	CWQGTHFLTF	ko	15	3.36323	99	22.1973
229	clonotype1730	IGK	IGKC	Lc	IGKV12-41	None	IGKJ5	CQHFWSTLTF	ko	9	2.01794	99	22.1973
230	clonotype1731	IGK	IGKC	Lc	IGKV4-91	None	IGKJ4	CQQGSSIPFTF	ko	4	0.896861	92	20.6278
231	clonotype1741	IGK	IGKC	Lc	IGKV14-126	None	IGKJ5	CLQHGESPPTF	ko	6	1.34529	99	22.1973
232	clonotype1742	IGK	IGKC	Lc	IGKV2-109	None	IGKJ1	CAQNLELPRTF	ko	11	2.46637	136	30.4933
233	clonotype1744	IGK	IGKC	Lc	IGKV6-23	None	IGKJ1	CQQYSSYTWTF	ko	13	2.9148	136	30.4933
234	clonotype1752	IGK	IGKC	Lc	IGKV4-80	None	IGKJ1	CHQWSSYPWTF	ko	3	0.672646	136	30.4933
235	clonotype1753	IGK	IGKC	Lc	IGKV3-10	None	IGKJ2	CQQNNEDPYTF	ko	8	1.79372	110	24.6637
236	clonotype1754	IGK	IGKC	Lc	IGKV6-32	None	IGKJ1	CQQDYSSPRTF	ko	9	2.01794	136	30.4933
237	clonotype1760	IGK	IGKC	Lc	IGKV6-23	None	IGKJ2	CQQYSSYHTF	ko	13	2.9148	110	24.6637
238	clonotype1761	IGK	IGKC	Lc	IGKV3-10	None	IGKJ2	CQQNNEDPMYTF	ko	8	1.79372	110	24.6637
239	clonotype1769	IGK	IGKC	Lc	IGKV8-21	None	IGKJ5	CKQSYNLLTF	ko	7	1.56951	99	22.1973
240	clonotype1771	IGK	IGKC	Lc	IGKV1-122	None	IGKJ2	CLQVTHVPYTF	ko	2	0.44843	110	24.6637
241	clonotype1794	IGK	IGKC	Lc	IGKV3-10	None	IGKJ5	CQQNNEDPLTF	ko	8	1.79372	99	22.1973
242	clonotype1795	IGK	IGKC	Lc	IGKV4-55	None	IGKJ2	CQQWSSYPKYTF	ko	3	0.672646	110	24.6637
243	clonotype1797	IGK	IGKC	Lc	IGKV6-32	None	IGKJ5	CQQDYSSPLTF	ko	9	2.01794	99	22.1973
244	clonotype1810	IGK	IGKC	Lc	IGKV6-25	None	IGKJ1	CQQHYSTTWTF	ko	3	0.672646	136	30.4933
245	clonotype1819	IGK	IGKC	Lc	IGKV4-74	None	IGKJ2	CHQYHRSPYTF	ko	6	1.34529	110	24.6637
246	clonotype1820	IGK	IGKC	Lc	IGKV3-7	None	IGKJ5	CQHSWEIPPTF	ko	4	0.896861	99	22.1973
247	clonotype1822	IGK	IGKC	Lc	IGKV4-57-1	None	IGKJ5	CQQYSGYPLLTF	ko	4	0.896861	99	22.1973
248	clonotype1823	IGK	IGKC	Lc	IGKV8-30	None	IGKJ1	CQQYYSYPWTF	ko	10	2.24215	136	30.4933
249	clonotype1827	IGK	IGKC	Lc	IGKV8-24	None	IGKJ2	CQQHYSTPPTF	ko	4	0.896861	110	24.6637
250	clonotype1830	IGK	IGKC	Lc	IGKV5-43	None	IGKJ1	CQQSNSWPQTF	ko	7	1.56951	136	30.4933
251	clonotype1845	IGK	IGKC	Lc	IGKV1-135	None	IGKJ1	CWQGTHFWTF	ko	15	3.36323	136	30.4933
252	clonotype1846	IGK	IGKC	Lc	IGKV14-111	None	IGKJ4	CLQYDEFPFTF	ko	14	3.13901	92	20.6278
253	clonotype1860	IGK	IGKC	Lc	IGKV17-121	None	IGKJ5	CLQSDNLPLLTF	ko	7	1.56951	99	22.1973
254	clonotype1862	IGK	IGKC	Lc	IGKV4-86	None	IGKJ2	CQQWNYPYTF	ko	5	1.12108	110	24.6637
255	clonotype1863	IGK	IGKC	Lc	IGKV19-93	None	IGKJ4	CLQYYDLFTF	ko	16	3.58744	92	20.6278
256	clonotype1867	IGK	IGKC	Lc	IGKV6-20	None	IGKJ2	CGQSYSYPYTF	ko	7	1.56951	110	24.6637
257	clonotype1872	IGK	IGKC	Lc	IGKV14-126	None	IGKJ5	CLQHGESPLTF	ko	6	1.34529	99	22.1973
258	clonotype1886	IGK	IGKC	Lc	IGKV9-124	None	IGKJ1	CLQYASYPRTF	ko	8	1.79372	136	30.4933
259	clonotype1901	IGK	IGKC	Lc	IGKV8-24	None	IGKJ5	CQQHYSTPLTF	ko	4	0.896861	99	22.1973
260	clonotype1902	IGK	IGKC	Lc	IGKV14-100	None	IGKJ4	CVQYAQFPFTF	ko	3	0.672646	92	20.6278
261	clonotype1906	IGK	IGKC	Lc	IGKV2-109	None	IGKJ4	CAQNLELPFTF	ko	11	2.46637	92	20.6278
262	clonotype1911	IGK	IGKC	Lc	IGKV8-18	None	IGKJ5	CQHNHGSFLPLTF	ko	3	0.672646	99	22.1973
263	clonotype1914	IGK	IGKC	Lc	IGKV4-59	None	IGKJ5	CQQWSSNPPITF	ko	7	1.56951	99	22.1973
264	clonotype1922	IGK	IGKC	Lc	IGKV6-15	None	IGKJ5	CQQYNSYPLLTF	ko	10	2.24215	99	22.1973
265	clonotype1930	IGK	IGKC	Lc	IGKV13-84	None	IGKJ4	CQQYWSTPFTF	ko	8	1.79372	92	20.6278
266	clonotype1936	IGK	IGKC	Lc	IGKV6-14	None	IGKJ2	CLQHWNYPYTF	ko	4	0.896861	110	24.6637
267	clonotype1938	IGK	IGKC	Lc	IGKV9-124	None	IGKJ4	CLQYASYPFTF	ko	8	1.79372	92	20.6278
268	clonotype1941	IGK	IGKC	Lc	IGKV4-79	None	IGKJ2	CQQWSSYPQYTF	ko	3	0.672646	110	24.6637
269	clonotype1954	IGK	IGKC	Lc	IGKV2-109	None	IGKJ1	CAQNLELPWTF	ko	11	2.46637	136	30.4933
270	clonotype1958	IGK	IGKC	Lc	IGKV4-68	None	IGKJ2	CQQWSSNPPKYTF	ko	4	0.896861	110	24.6637
271	clonotype1959	IGK	IGKC	Lc	IGKV4-57-1	None	IGKJ4	CQQYSGYPFTF	ko	4	0.896861	92	20.6278
272	clonotype1965	IGK	IGKC	Lc	IGKV6-23	None	IGKJ4	CQQYSSYPLFTF	ko	13	2.9148	92	20.6278
273	clonotype1975	IGK	IGKC	Lc	IGKV4-70	None	IGKJ5	CHQRSSYPTF	ko	5	1.12108	99	22.1973
274	clonotype1987	IGK	IGKC	Lc	IGKV3-12	None	IGKJ2	CQHSRELPYMYTF	ko	8	1.79372	110	24.6637
275	clonotype1990	IGK	IGKC	Lc	IGKV12-41	None	IGKJ1	CQHFWSTWTF	ko	9	2.01794	136	30.4933
276	clonotype1991	IGK	IGKC	Lc	IGKV12-89	None	IGKJ2	CQNVLSTPYTF	ko	4	0.896861	110	24.6637
277	clonotype2001	IGK	IGKC	Lc	IGKV8-30	None	IGKJ4	CQQYYSYPIFTF	ko	10	2.24215	92	20.6278
278	clonotype2005	IGK	IGKC	Lc	IGKV19-93	None	IGKJ4	CLQYDNLFTF	ko	16	3.58744	92	20.6278
279	clonotype2008	IGK	IGKC	Lc	IGKV12-98	None	IGKJ1	CQQLYSTPWTF	ko	3	0.672646	136	30.4933
280	clonotype2015	IGK	IGKC	Lc	IGKV5-48	None	IGKJ2	CQQSNSWPMYTF	ko	7	1.56951	110	24.6637
281	clonotype2038	IGK	IGKC	Lc	IGKV3-4	None	IGKJ5	CQQSNEDPPTF	ko	6	1.34529	99	22.1973
282	clonotype2046	IGK	IGKC	Lc	IGKV4-50	None	IGKJ1	CQQFTSSHRTF	ko	8	1.79372	136	30.4933
283	clonotype2052	IGK	IGKC	Lc	IGKV12-89	None	IGKJ5	CQNVLSTPLTF	ko	4	0.896861	99	22.1973
284	clonotype2054	IGK	IGKC	Lc	IGKV8-19	None	IGKJ5	CQNDYSYPPLTF	ko	5	1.12108	99	22.1973
285	clonotype2056	IGK	IGKC	Lc	IGKV4-59	None	IGKJ2	CQQWSSNPQMYTF	ko	7	1.56951	110	24.6637
286	clonotype2059	IGK	IGKC	Lc	IGKV12-38	None	IGKJ2	CKQAYDVPYTF	ko	3	0.672646	110	24.6637
287	clonotype2066	IGK	IGKC	Lc	IGKV12-41	None	IGKJ4	CQHFWSTIFTF	ko	9	2.01794	92	20.6278
288	clonotype2070	IGK	IGKC	Lc	IGKV4-74	None	IGKJ1	CHQYHRSPPTF	ko	6	1.34529	136	30.4933
289	clonotype2076	IGK	IGKC	Lc	IGKV1-135	None	IGKJ2	CWQGTHFYTF	ko	15	3.36323	110	24.6637
290	clonotype2093	IGK	IGKC	Lc	IGKV15-103	None	IGKJ1	CQQGQSYRTF	ko	5	1.12108	136	30.4933
291	clonotype2098	IGK	IGKC	Lc	IGKV5-48	None	IGKJ4	CQQSNSWPFTF	ko	7	1.56951	92	20.6278
292	clonotype2099	IGK	IGKC	Lc	IGKV8-21	None	IGKJ1	CKQSYNLWTF	ko	7	1.56951	136	30.4933
293	clonotype2116	IGK	IGKC	Lc	IGKV14-111	None	IGKJ5	CLQYDEFLTF	ko	14	3.13901	99	22.1973
294	clonotype2120	IGK	IGKC	Lc	IGKV8-27	None	IGKJ2	CHQYLSLYTF	ko	8	1.79372	110	24.6637
295	clonotype2126	IGK	IGKC	Lc	IGKV10-96	None	IGKJ1	CQQGNTLPTF	ko	13	2.9148	136	30.4933
296	clonotype2128	IGL	IGLC1	Lc	IGLV1	None	IGLJ1	CALWYSNSWVF	ko	7	1.56951	4	0.896861
297	clonotype2136	IGK	IGKC	Lc	IGKV1-135	None	IGKJ1	CWQGTHFRTF	ko	15	3.36323	136	30.4933
298	clonotype2143	IGK	IGKC	Lc	IGKV12-46	None	IGKJ2	CQHFWGTYTF	ko	7	1.56951	110	24.6637
299	clonotype2150	IGK	IGKC	Lc	IGKV10-96	None	IGKJ4	CQQGNTLPFTF	ko	13	2.9148	92	20.6278
300	clonotype2153	IGK	IGKC	Lc	IGKV3-7	None	IGKJ1	CQHSWEIPWTF	ko	4	0.896861	136	30.4933
301	clonotype2154	IGK	IGKC	Lc	IGKV9-123	None	IGKJ4	CLQRNAYPLTF	ko	1	0.224215	92	20.6278
302	clonotype2161	IGK	IGKC	Lc	IGKV8-30	None	IGKJ5	CQQYYSYPTF	ko	10	2.24215	99	22.1973
303	clonotype2163	IGK	IGKC	Lc	IGKV12-98	None	IGKJ1	CQQLYSTPLTF	ko	3	0.672646	136	30.4933
304	clonotype2166	IGK	IGKC	Lc	IGKV3-2	None	IGKJ4	CQQSKEVPLTF	ko	7	1.56951	92	20.6278
305	clonotype2189	IGK	IGKC	Lc	IGKV10-96	None	IGKJ2	CQQGNTLPPYTF	ko	13	2.9148	110	24.6637
306	clonotype2202	IGK	IGKC	Lc	IGKV9-124	None	IGKJ2	CLQYASYPYTF	ko	8	1.79372	110	24.6637
307	clonotype2209	IGK	IGKC	Lc	IGKV1-88	None	IGKJ4	CLQGTHQPFTF	ko	7	1.56951	92	20.6278
308	clonotype2226	IGK	IGKC	Lc	IGKV2-109	None	IGKJ2	CAQNLELYTF	ko	11	2.46637	110	24.6637
309	clonotype2240	IGK	IGKC	Lc	IGKV4-59	None	IGKJ1	CQQWSSNPWTF	ko	7	1.56951	136	30.4933
310	clonotype2245	IGK	IGKC	Lc	IGKV1-133	None	IGKJ1	CVQGTHFPRTF	ko	5	1.12108	136	30.4933
311	clonotype2246	IGK	IGKC	Lc	IGKV9-120	None	IGKJ4	CLQYASSPFTF	ko	6	1.34529	92	20.6278
312	clonotype2256	IGK	IGKC	Lc	IGKV4-55	None	IGKJ2	CQQWSSYPYTF	ko	3	0.672646	110	24.6637
313	clonotype2262	IGK	IGKC	Lc	IGKV6-32	None	IGKJ2	CQQDYSSPPYTF	ko	9	2.01794	110	24.6637
314	clonotype2265	IGK	IGKC	Lc	IGKV11-125	None	IGKJ2	CLQHSYLPYTF	ko	1	0.224215	110	24.6637
315	clonotype2266	IGK	IGKC	Lc	IGKV10-94	None	IGKJ1	CQQYSKLPPTF	ko	8	1.79372	136	30.4933
316	clonotype2274	IGK	IGKC	Lc	IGKV6-23	None	IGKJ1	CQQYSSYRTF	ko	13	2.9148	136	30.4933
317	clonotype2281	IGK	IGKC	Lc	IGKV1-110	None	IGKJ5	CSQSTHVPPLTF	ko	10	2.24215	99	22.1973
318	clonotype2283	IGK	IGKC	Lc	IGKV1-132	None	IGKJ4	CLQGTYYPFTF	ko	3	0.672646	92	20.6278
319	clonotype2284	IGK	IGKC	Lc	IGKV6-15	None	IGKJ2	CQQYNSYTF	ko	10	2.24215	110	24.6637
320	clonotype2287	IGK	IGKC	Lc	IGKV2-109	None	IGKJ1	CAQNLELWTF	ko	11	2.46637	136	30.4933
321	clonotype2290	IGK	IGKC	Lc	IGKV12-46	None	IGKJ1	CQHFWGTPRTF	ko	7	1.56951	136	30.4933
322	clonotype2312	IGK	IGKC	Lc	IGKV3-10	None	IGKJ5	CQQNNEDPPLTF	ko	8	1.79372	99	22.1973
323	clonotype2331	IGK	IGKC	Lc	IGKV14-130	None	IGKJ5	CLQFYEFPLTF	ko	3	0.672646	99	22.1973
324	clonotype2336	IGK	IGKC	Lc	IGKV8-27	None	IGKJ2	CHQYLSPYTF	ko	8	1.79372	110	24.6637
325	clonotype2340	IGK	IGKC	Lc	IGKV19-93	None	IGKJ2	CLQYDNLLYMYTF	ko	16	3.58744	110	24.6637
326	clonotype2346	IGK	IGKC	Lc	IGKV4-86	None	IGKJ1	CQQWNYPLMTF	ko	5	1.12108	136	30.4933
327	clonotype2351	IGK	IGKC	Lc	IGKV14-111	None	IGKJ5	CLQYDEFPPTF	ko	14	3.13901	99	22.1973
328	clonotype2359	IGK	IGKC	Lc	IGKV4-61	None	IGKJ1	CQQYHSYPRTF	ko	4	0.896861	136	30.4933
329	clonotype2362	IGK	IGKC	Lc	IGKV12-44	None	IGKJ1	CQHHYGTPWTF	ko	5	1.12108	136	30.4933
330	clonotype2365	IGK	IGKC	Lc	IGKV3-12	None	IGKJ5	CQHSRELPPTF	ko	8	1.79372	99	22.1973
331	clonotype2392	IGK	IGKC	Lc	IGKV6-23	None	IGKJ5	CQQYSSSPLTF	ko	13	2.9148	99	22.1973
332	clonotype2401	IGK	IGKC	Lc	IGKV13-84	None	IGKJ4	CQQYWSTPPFTF	ko	8	1.79372	92	20.6278
333	clonotype2432	IGK	IGKC	Lc	IGKV2-109	None	IGKJ1	CAQNLELPPWTF	ko	11	2.46637	136	30.4933
334	clonotype2433	IGK	IGKC	Lc	IGKV3-2	None	IGKJ1	CQQSKEVPRTF	ko	7	1.56951	136	30.4933
335	clonotype2437	IGK	IGKC	Lc	IGKV4-72	None	IGKJ5	CQQWSSNPPMLTF	ko	3	0.672646	99	22.1973
336	clonotype2438	IGK	IGKC	Lc	IGKV6-15	None	IGKJ2	CQQYNSYPLYTF	ko	10	2.24215	110	24.6637
337	clonotype2446	IGK	IGKC	Lc	IGKV2-109	None	IGKJ4	CAQNLELPTF	ko	11	2.46637	92	20.6278
338	clonotype2490	IGK	IGKC	Lc	IGKV5-43	None	IGKJ1	CQQSNSWPRTF	ko	7	1.56951	136	30.4933
339	clonotype2507	IGK	IGKC	Lc	IGKV1-133	None	IGKJ4	CVQGTHFPFTF	ko	5	1.12108	92	20.6278
340	clonotype2509	IGK	IGKC	Lc	IGKV15-103	None	IGKJ1	CQQGQSYPWTF	ko	5	1.12108	136	30.4933
341	clonotype2510	IGK	IGKC	Lc	IGKV2-137	None	IGKJ5	CMQHLEYPLTF	ko	4	0.896861	99	22.1973
342	clonotype2513	IGK	IGKC	Lc	IGKV10-94	None	IGKJ1	CQQYSKLPRTF	ko	8	1.79372	136	30.4933
343	clonotype2526	IGK	IGKC	Lc	IGKV14-126	None	IGKJ1	CLQHGESPWTF	ko	6	1.34529	136	30.4933
344	clonotype2538	IGK	IGKC	Lc	IGKV3-1	None	IGKJ5	CQQSRKVPSTF	ko	3	0.672646	99	22.1973
345	clonotype2550	IGK	IGKC	Lc	IGKV12-98	None	IGKJ2	CQQLYSTPYTF	ko	3	0.672646	110	24.6637
346	clonotype2553	IGK	IGKC	Lc	IGKV6-20	None	IGKJ5	CGQSYSYPLTF	ko	7	1.56951	99	22.1973
347	clonotype2555	IGK	IGKC	Lc	IGKV8-30	None	IGKJ1	CQQYYSYRTF	ko	10	2.24215	136	30.4933
348	clonotype2563	IGK	IGKC	Lc	IGKV1-117	None	IGKJ1	CFQGSLWTF	ko	7	1.56951	136	30.4933
349	clonotype2576	IGK	IGKC	Lc	IGKV10-96	None	IGKJ1	CQQGNTLPPWTF	ko	13	2.9148	136	30.4933
350	clonotype2577	IGK	IGKC	Lc	IGKV4-50	None	IGKJ5	CQQFTSSPSMLTF	ko	8	1.79372	99	22.1973
351	clonotype2587	IGK	IGKC	Lc	IGKV3-12	None	IGKJ1	CQHSRELPRTF	ko	8	1.79372	136	30.4933
352	clonotype2590	IGK	IGKC	Lc	IGKV3-12	None	IGKJ5	CQHSRELTF	ko	8	1.79372	99	22.1973
353	clonotype2598	IGK	IGKC	Lc	IGKV8-21	None	IGKJ4	CKQSYNLPTF	ko	7	1.56951	92	20.6278
354	clonotype2641	IGK	IGKC	Lc	IGKV3-1	None	IGKJ2	CQQSRKVPYTF	ko	3	0.672646	110	24.6637
355	clonotype2682	IGK	IGKC	Lc	IGKV8-21	None	IGKJ5	CKQSYNLALTF	ko	7	1.56951	99	22.1973
356	clonotype2747	IGK	IGKC	Lc	IGKV4-63	None	IGKJ4	CFQGSGYPFTF	ko	3	0.672646	92	20.6278
357	clonotype2764	IGK	IGKC	Lc	IGKV5-43	None	IGKJ4	CQQSNSWPHFTF	ko	7	1.56951	92	20.6278
358	clonotype2769	IGK	IGKC	Lc	IGKV4-86	None	IGKJ4	CQQWNYPLFTF	ko	5	1.12108	92	20.6278
359	clonotype309	IGK	IGKC	Lc	IGKV8-18	None	IGKJ2	CQHNHGSFLPYTF	ko	3	0.672646	110	24.6637
360	clonotype316	IGK	IGKC	Lc	IGKV6-17	None	IGKJ2	CQQHYSTPYMYTF	ko	4	0.896861	110	24.6637
361	clonotype322	IGK	IGKC	Lc	IGKV14-111	None	IGKJ4	CLQYDEFPPAF	ko	14	3.13901	92	20.6278
362	clonotype326	IGK	IGKC	Lc	IGKV4-79	None	IGKJ5	CHQWSSYPLTF	ko	3	0.672646	99	22.1973
363	clonotype329	IGK	IGKC	Lc	IGKV4-50	None	IGKJ1	CQQFTSSPSMTF	ko	8	1.79372	136	30.4933
364	clonotype336	IGK	IGKC	Lc	IGKV12-89	None	IGKJ4	CQNVLSTPPTF	ko	4	0.896861	92	20.6278
365	clonotype344	IGK	IGKC	Lc	IGKV6-20	None	IGKJ5	CGQSYSYLTF	ko	7	1.56951	99	22.1973
366	clonotype363	IGK	IGKC	Lc	IGKV4-70	None	IGKJ4	CHQRSSYPFTF	ko	5	1.12108	92	20.6278
367	clonotype383	IGK	IGKC	Lc	IGKV10-96	None	IGKJ5	CQQGNTLLTF	ko	13	2.9148	99	22.1973
368	clonotype390	IGK	IGKC	Lc	IGKV6-15	None	IGKJ1	CQQYNSYPWTF	ko	10	2.24215	136	30.4933
369	clonotype393	IGK	IGKC	Lc	IGKV1-133	None	IGKJ2	CVQGTHFPYTF	ko	5	1.12108	110	24.6637
370	clonotype403	IGK	IGKC	Lc	IGKV3-12	None	IGKJ5	CQHSRELLTF	ko	8	1.79372	99	22.1973
371	clonotype429	IGK	IGKC	Lc	IGKV6-32	None	IGKJ5	CQQDYSSPALTF	ko	9	2.01794	99	22.1973
372	clonotype433	IGK	IGKC	Lc	IGKV6-23	None	IGKJ1	CQQYSTFPWTF	ko	13	2.9148	136	30.4933
373	clonotype441	IGK	IGKC	Lc	IGKV4-91	None	IGKJ5	CQQGSSIPLTF	ko	4	0.896861	99	22.1973
374	clonotype477	IGK	IGKC	Lc	IGKV17-121	None	IGKJ5	CLQSDNLPTLTF	ko	7	1.56951	99	22.1973
375	clonotype531	IGK	IGKC	Lc	IGKV4-50	None	IGKJ5	CQQFTSSPLTF	ko	8	1.79372	99	22.1973
376	clonotype579	IGK	IGKC	Lc	IGKV4-50	None	IGKJ2	CQQFTSSYTF	ko	8	1.79372	110	24.6637
377	clonotype580	IGK	IGKC	Lc	IGKV6-17	None	IGKJ2	CQQHYSTPPEYTF	ko	4	0.896861	110	24.6637
378	clonotype595	IGK	IGKC	Lc	IGKV1-110	None	IGKJ2	CSQSTHVPTF	ko	10	2.24215	110	24.6637
379	clonotype599	IGK	IGKC	Lc	IGKV3-2	None	IGKJ5	CQQSKEVPPTF	ko	7	1.56951	99	22.1973
380	clonotype614	IGK	IGKC	Lc	IGKV12-38	None	IGKJ1	CKQAYDVPWTF	ko	3	0.672646	136	30.4933
381	clonotype637	IGK	IGKC	Lc	IGKV12-46	None	IGKJ4	CQHFWGTPFTF	ko	7	1.56951	92	20.6278
382	clonotype648	IGL	IGLC1	Lc	IGLV1	None	IGLJ1	CALWYSNHLVF	ko	7	1.56951	4	0.896861
383	clonotype662	IGK	IGKC	Lc	IGKV14-111	None	IGKJ2	CLQYDEFPYMYTF	ko	14	3.13901	110	24.6637
384	clonotype671	IGK	IGKC	Lc	IGKV3-4	None	IGKJ2	CQQSNEDPMYTF	ko	6	1.34529	110	24.6637
385	clonotype706	IGK	IGKC	Lc	IGKV4-86	None	IGKJ5	CQQWNYPLTF	ko	5	1.12108	99	22.1973
386	clonotype708	IGK	IGKC	Lc	IGKV3-10	None	IGKJ4	CQQNNEDPFTF	ko	8	1.79372	92	20.6278
387	clonotype721	IGK	IGKC	Lc	IGKV9-124	None	IGKJ5	CLQYASYPLTF	ko	8	1.79372	99	22.1973
388	clonotype726	IGK	IGKC	Lc	IGKV17-121	None	IGKJ4	CLQSDNFTF	ko	7	1.56951	92	20.6278
389	clonotype728	IGK	IGKC	Lc	IGKV10-96	None	IGKJ2	CQQGNTLPLYTF	ko	13	2.9148	110	24.6637
390	clonotype731	IGK	IGKC	Lc	IGKV4-70	None	IGKJ4	CHQRSSYLTF	ko	5	1.12108	92	20.6278
391	clonotype774	IGK	IGKC	Lc	IGKV16-104	None	IGKJ5	CQQHNEYPYVTF	ko	4	0.896861	99	22.1973
392	clonotype784	IGK	IGKC	Lc	IGKV2-109	None	IGKJ1	CAQNLELRTF	ko	11	2.46637	136	30.4933
393	clonotype818	IGK	IGKC	Lc	IGKV6-23	None	IGKJ5	CQQYSSYLTF	ko	13	2.9148	99	22.1973
394	clonotype823	IGK	IGKC	Lc	IGKV1-135	None	IGKJ1	CWQGTHFPGTF	ko	15	3.36323	136	30.4933
395	clonotype831	IGK	IGKC	Lc	IGKV14-126	None	IGKJ1	CLQHGESPPWTF	ko	6	1.34529	136	30.4933
396	clonotype840	IGK	IGKC	Lc	IGKV8-30	None	IGKJ1	CQQYYSYPRTF	ko	10	2.24215	136	30.4933
397	clonotype850	IGK	IGKC	Lc	IGKV4-59	None	IGKJ1	CHQYHRSPWTF	ko	7	1.56951	136	30.4933
398	clonotype864	IGK	IGKC	Lc	IGKV4-68	None	IGKJ5	CQQWSSNLTF	ko	4	0.896861	99	22.1973
399	clonotype865	IGK	IGKC	Lc	IGKV4-80	None	IGKJ1	CHQWSSYPTF	ko	3	0.672646	136	30.4933
400	clonotype867	IGK	IGKC	Lc	IGKV1-135	None	IGKJ1	CWQGTHFPTWTF	ko	15	3.36323	136	30.4933
401	clonotype886	IGK	IGKC	Lc	IGKV6-17	None	IGKJ2	CQQHYSTPPYTF	ko	4	0.896861	110	24.6637
402	clonotype902	IGK	IGKC	Lc	IGKV13-84	None	IGKJ1	CQQYWSTPRTF	ko	8	1.79372	136	30.4933
403	clonotype904	IGK	IGKC	Lc	IGKV14-111	None	IGKJ1	CLQYDELWTF	ko	14	3.13901	136	30.4933
404	clonotype908	IGK	IGKC	Lc	IGKV1-88	None	IGKJ1	CLQGTHQWTF	ko	7	1.56951	136	30.4933
405	clonotype929	IGK	IGKC	Lc	IGKV17-127	None	IGKJ1	CLQSDNMPWTF	ko	4	0.896861	136	30.4933
406	clonotype938	IGK	IGKC	Lc	IGKV4-57	None	IGKJ4	CQQRSSYPPITF	ko	7	1.56951	92	20.6278
407	clonotype947	IGK	IGKC	Lc	IGKV3-1	None	IGKJ1	CQQSRKVPWTF	ko	3	0.672646	136	30.4933
408	clonotype951	IGK	IGKC	Lc	IGKV14-130	None	IGKJ1	CLQFYEFPPTF	ko	3	0.672646	136	30.4933
409	clonotype967	IGK	IGKC	Lc	IGKV4-70	None	IGKJ5	CHQRSSYPLTF	ko	5	1.12108	99	22.1973
410	clonotype970	IGK	IGKC	Lc	IGKV4-72	None	IGKJ5	CQQWSSNPPLTF	ko	3	0.672646	99	22.1973
411	clonotype1116	IGL	IGLC3	Lc	IGLV1	None	IGLJ3	CALWYSNQFIF	ko	7	1.56951	3	0.672646
412	clonotype1126	IGK	IGKC	Lc	IGKV8-19	None	IGKJ5	CQNDYSYPPTF	ko	5	1.12108	99	22.1973
413	clonotype1140	IGK	IGKC	Lc	IGKV1-88	None	IGKJ1	CLQGTHQPPWTF	ko	7	1.56951	136	30.4933
414	clonotype1141	IGK	IGKC	Lc	IGKV8-27	None	IGKJ2	CHQYLLYTF	ko	8	1.79372	110	24.6637
415	clonotype1178	IGK	IGKC	Lc	IGKV3-2	None	IGKJ5	CQQSKEVPPLTF	ko	7	1.56951	99	22.1973
416	clonotype1181	IGK	IGKC	Lc	IGKV14-111	None	IGKJ1	CLQYDEFRTF	ko	14	3.13901	136	30.4933
417	clonotype1450	IGK	IGKC	Lc	IGKV5-43	None	IGKJ4	CQQSNSWPHAF	ko	7	1.56951	92	20.6278
418	clonotype1483	IGK	IGKC	Lc	IGKV4-68	None	IGKJ1	CQQWSSNPRTF	ko	4	0.896861	136	30.4933
419	clonotype1600	IGK	IGKC	Lc	IGKV8-16	None	IGKJ2	CQQHLHIPYTF	ko	1	0.224215	110	24.6637
420	clonotype1689	IGK	IGKC	Lc	IGKV8-18	None	IGKJ4	CQHNHGSFLPFTF	ko	3	0.672646	92	20.6278
421	clonotype1709	IGK	IGKC	Lc	IGKV4-91	None	IGKJ2	CQQGSSIPYTF	ko	4	0.896861	110	24.6637
422	clonotype1765	IGK	IGKC	Lc	IGKV6-23	None	IGKJ5	CQQYSSYPTF	ko	13	2.9148	99	22.1973
423	clonotype1808	IGK	IGKC	Lc	IGKV4-74	None	IGKJ4	CHQYHRSPFTF	ko	6	1.34529	92	20.6278
424	clonotype1856	IGK	IGKC	Lc	IGKV9-124	None	IGKJ1	CLQYASYRTF	ko	8	1.79372	136	30.4933
425	clonotype1878	IGK	IGKC	Lc	IGKV10-94	None	IGKJ1	CQQYSKLWTF	ko	8	1.79372	136	30.4933
426	clonotype1898	IGK	IGKC	Lc	IGKV1-133	None	IGKJ5	CVQGTHFPLTF	ko	5	1.12108	99	22.1973
427	clonotype1921	IGK	IGKC	Lc	IGKV15-103	None	IGKJ4	CQQGQSYPFTF	ko	5	1.12108	92	20.6278
428	clonotype2051	IGK	IGKC	Lc	IGKV10-94	None	IGKJ4	CQQYSKLPPFTF	ko	8	1.79372	92	20.6278
429	clonotype2144	IGK	IGKC	Lc	IGKV4-63	None	IGKJ2	CFQGSGYPYTF	ko	3	0.672646	110	24.6637
430	clonotype2218	IGK	IGKC	Lc	IGKV8-27	None	IGKJ2	CHQYLSSYMYTF	ko	8	1.79372	110	24.6637
431	clonotype2285	IGK	IGKC	Lc	IGKV6-15	None	IGKJ2	CQQYNSYLMYTF	ko	10	2.24215	110	24.6637
432	clonotype2330	IGK	IGKC	Lc	IGKV5-45	None	IGKJ2	CQQSNSWPQYTF	ko	2	0.44843	110	24.6637
433	clonotype2375	IGK	IGKC	Lc	IGKV5-43	None	IGKJ4	CQQSNSWPLFTF	ko	7	1.56951	92	20.6278
434	clonotype2581	IGK	IGKC	Lc	IGKV6-23	None	IGKJ5	CQQYSSYALTF	ko	13	2.9148	99	22.1973
435	clonotype2613	IGK	IGKC	Lc	IGKV6-32	None	IGKJ1	CQQDYSSTWTF	ko	9	2.01794	136	30.4933
436	clonotype2694	IGK	IGKC	Lc	IGKV1-132	None	IGKJ5	CLQGTYYPLTF	ko	3	0.672646	99	22.1973
437	clonotype2696	IGK	IGKC	Lc	IGKV20-101-2	None	IGKJ1	CQQHFHYWTF	ko	1	0.224215	136	30.4933
438	clonotype2710	IGK	IGKC	Lc	IGKV4-57	None	IGKJ2	CQQRSSYPQYTF	ko	7	1.56951	110	24.6637
439	clonotype2759	IGK	IGKC	Lc	IGKV1-135	None	IGKJ1	CWQGTQWTF	ko	15	3.36323	136	30.4933
440	clonotype2762	IGK	IGKC	Lc	IGKV1-132	None	IGKJ2	CLQGTYYPHTF	ko	3	0.672646	110	24.6637
441	clonotype2772	IGK	IGKC	Lc	IGKV19-93	None	IGKJ1	CLQYDNLLPTF	ko	16	3.58744	136	30.4933
442	clonotype391	IGL	IGLC3	Lc	IGLV1	None	IGLJ3	CALWYSNQTFIF	ko	7	1.56951	3	0.672646
443	clonotype464	IGK	IGKC	Lc	IGKV19-93	None	IGKJ2	CLQYDNLHTF	ko	16	3.58744	110	24.6637
444	clonotype515	IGK	IGKC	Lc	IGKV4-80	None	IGKJ1	CHQWSSYWTF	ko	3	0.672646	136	30.4933
445	clonotype564	IGK	IGKC	Lc	IGKV4-69	None	IGKJ1	CHQRSSYPWTF	ko	1	0.224215	136	30.4933
446	clonotype890	IGK	IGKC	Lc	IGKV13-84	None	IGKJ1	CQQYWSTRTF	ko	8	1.79372	136	30.4933
447	clonotype1000	IGK	IGKC	Lc	IGKV6-15	None	IGKJ5	CQQYNSYPLLTF	wt	11	2.35043	102	21.7949
448	clonotype1001	IGK	IGKC	Lc	IGKV1-135	None	IGKJ5	CWQGTHFPLTF	wt	14	2.99145	102	21.7949
449	clonotype1002	IGL	IGLC1	Lc	IGLV1	None	IGLJ1	CALWYSNWVF	wt	16	3.4188	14	2.99145
450	clonotype1003	IGK	IGKC	Lc	IGKV14-111	None	IGKJ1	CLQYDEFPWTF	wt	11	2.35043	136	29.0598
451	clonotype1004	IGK	IGKC	Lc	IGKV2-109	None	IGKJ5	CAQNLELPLTF	wt	11	2.35043	102	21.7949
452	clonotype1005	IGK	IGKC	Lc	IGKV8-24	None	IGKJ2	CQQHYSTPYTF	wt	3	0.641026	123	26.2821
453	clonotype1006	IGL	IGLC1	Lc	IGLV1	None	IGLJ1	CALWYSNHFVF	wt	16	3.4188	14	2.99145
454	clonotype1007	IGK	IGKC	Lc	IGKV8-27	None	IGKJ5	CHQYLSSLTF	wt	8	1.7094	102	21.7949
455	clonotype1008	IGK	IGKC	Lc	IGKV6-32	None	IGKJ1	CQQDYSSPRTF	wt	5	1.06838	136	29.0598
456	clonotype1009	IGK	IGKC	Lc	IGKV3-4	None	IGKJ2	CQQSNEDPPTF	wt	6	1.28205	123	26.2821
457	clonotype1010	IGK	IGKC	Lc	IGKV12-46	None	IGKJ1	CQHFWGTPPTF	wt	8	1.7094	136	29.0598
458	clonotype1012	IGK	IGKC	Lc	IGKV3-5	None	IGKJ4	CQQSNEDPFTF	wt	3	0.641026	80	17.094
459	clonotype1014	IGK	IGKC	Lc	IGKV4-74	None	IGKJ4	CHQYHRSPFTF	wt	4	0.854701	80	17.094
460	clonotype1015	IGK	IGKC	Lc	IGKV4-70	None	IGKJ2	CHQRSSYPCTF	wt	6	1.28205	123	26.2821
461	clonotype1017	IGL	IGLC2	Lc	IGLV3	None	IGLJ2	CGVGDTIKEQFVYVF	wt	5	1.06838	8	1.7094
462	clonotype1019	IGK	IGKC	Lc	IGKV1-135	None	IGKJ2	CWQGTHFPQYTF	wt	14	2.99145	123	26.2821
463	clonotype1021	IGK	IGKC	Lc	IGKV3-12	None	IGKJ1	CQHSRELPWTF	wt	10	2.13675	136	29.0598
464	clonotype1022	IGK	IGKC	Lc	IGKV3-2	None	IGKJ1	CQQSKEVPWTF	wt	7	1.49573	136	29.0598
465	clonotype1023	IGL	IGLC1	Lc	IGLV1	None	IGLJ1	CALWYSNHWVF	wt	16	3.4188	14	2.99145
466	clonotype1024	IGL	IGLC1	Lc	IGLV2	None	IGLJ1	CALWYSTHWVF	wt	6	1.28205	14	2.99145
467	clonotype1026	IGK	IGKC	Lc	IGKV8-19	None	IGKJ5	CQNDYSYPLTF	wt	3	0.641026	102	21.7949
468	clonotype1030	IGK	IGKC	Lc	IGKV1-110	None	IGKJ1	CSQSTHVPRTF	wt	10	2.13675	136	29.0598
469	clonotype1031	IGK	IGKC	Lc	IGKV6-25	None	IGKJ1	CQQHYSTPPTF	wt	4	0.854701	136	29.0598
470	clonotype1032	IGK	IGKC	Lc	IGKV8-21	None	IGKJ2	CKQSYNLYTF	wt	4	0.854701	123	26.2821
471	clonotype1034	IGK	IGKC	Lc	IGKV13-85	None	IGKJ5	CQQYWSTPLTF	wt	5	1.06838	102	21.7949
472	clonotype1035	IGL	IGLC3	Lc	IGLV1	None	IGLJ3	CALWYSNHFIF	wt	16	3.4188	5	1.06838
473	clonotype1036	IGK	IGKC	Lc	IGKV15-103	None	IGKJ4	CQQGQSYPLTF	wt	7	1.49573	80	17.094
474	clonotype1037	IGK	IGKC	Lc	IGKV17-127	None	IGKJ2	CLQSDNMPYTF	wt	8	1.7094	123	26.2821
475	clonotype1038	IGK	IGKC	Lc	IGKV1-88	None	IGKJ2	CLQGTHQPYTF	wt	4	0.854701	123	26.2821
476	clonotype1041	IGK	IGKC	Lc	IGKV2-109	None	IGKJ4	CAQLLELPFTF	wt	11	2.35043	80	17.094
477	clonotype1044	IGK	IGKC	Lc	IGKV1-135	None	IGKJ1	CWQGTHFPQTF	wt	14	2.99145	136	29.0598
478	clonotype1047	IGK	IGKC	Lc	IGKV6-32	None	IGKJ4	CQQDYSSPFTF	wt	5	1.06838	80	17.094
479	clonotype1049	IGK	IGKC	Lc	IGKV14-126	None	IGKJ2	CLQHGESPYTF	wt	3	0.641026	123	26.2821
480	clonotype1050	IGK	IGKC	Lc	IGKV19-93	None	IGKJ2	CLQYDNLLYTF	wt	19	4.05983	123	26.2821
481	clonotype1051	IGK	IGKC	Lc	IGKV6-17	None	IGKJ4	CQQHYSTPFTF	wt	8	1.7094	80	17.094
482	clonotype1053	IGK	IGKC	Lc	IGKV16-104	None	IGKJ1	CQQHNEYPTF	wt	5	1.06838	136	29.0598
483	clonotype1057	IGK	IGKC	Lc	IGKV1-135	None	IGKJ2	CWQGTHFPYTF	wt	14	2.99145	123	26.2821
484	clonotype1058	IGK	IGKC	Lc	IGKV16-104	None	IGKJ5	CQQHNEYPLTF	wt	5	1.06838	102	21.7949
485	clonotype1060	IGK	IGKC	Lc	IGKV6-32	None	IGKJ2	CQQDYSSPYTF	wt	5	1.06838	123	26.2821
486	clonotype1061	IGK	IGKC	Lc	IGKV4-59	None	IGKJ2	CQQWSSNPYTF	wt	6	1.28205	123	26.2821
487	clonotype1062	IGK	IGKC	Lc	IGKV3-7	None	IGKJ5	CQHSWEIPLTF	wt	6	1.28205	102	21.7949
488	clonotype1064	IGK	IGKC	Lc	IGKV8-30	None	IGKJ4	CQQYYSYPFTF	wt	7	1.49573	80	17.094
489	clonotype1065	IGK	IGKC	Lc	IGKV3-2	None	IGKJ4	CQQSKEVPFTF	wt	7	1.49573	80	17.094
490	clonotype1066	IGK	IGKC	Lc	IGKV15-103	None	IGKJ2	CQQGQSYPYTF	wt	7	1.49573	123	26.2821
491	clonotype1068	IGK	IGKC	Lc	IGKV4-57	None	IGKJ2	CQQRSSYPPTF	wt	8	1.7094	123	26.2821
492	clonotype1070	IGK	IGKC	Lc	IGKV3-12	None	IGKJ2	CQHSRELPYTF	wt	10	2.13675	123	26.2821
493	clonotype1071	IGK	IGKC	Lc	IGKV1-117	None	IGKJ1	CFQGSHVPWTF	wt	9	1.92308	136	29.0598
494	clonotype1072	IGL	IGLC2	Lc	IGLV2	None	IGLJ2	CALWYSTHYVF	wt	6	1.28205	8	1.7094
495	clonotype1074	IGK	IGKC	Lc	IGKV10-94	None	IGKJ2	CQQYSKLPYTF	wt	4	0.854701	123	26.2821
496	clonotype1078	IGK	IGKC	Lc	IGKV1-117	None	IGKJ1	CFQGSHVPRTF	wt	9	1.92308	136	29.0598
497	clonotype1079	IGK	IGKC	Lc	IGKV8-24	None	IGKJ1	CQQHYSTPWTF	wt	3	0.641026	136	29.0598
498	clonotype1080	IGK	IGKC	Lc	IGKV1-88	None	IGKJ5	CLQGTHQPLTF	wt	4	0.854701	102	21.7949
499	clonotype1081	IGK	IGKC	Lc	IGKV8-16	None	IGKJ2	CQQHLHIPYTF	wt	6	1.28205	123	26.2821
500	clonotype1083	IGK	IGKC	Lc	IGKV14-100	None	IGKJ2	CVQYAQFPYTF	wt	5	1.06838	123	26.2821
501	clonotype1084	IGK	IGKC	Lc	IGKV4-50	None	IGKJ5	CQQFTSSPLTF	wt	7	1.49573	102	21.7949
502	clonotype1085	IGK	IGKC	Lc	IGKV1-133	None	IGKJ5	CVQGTHFPLTF	wt	5	1.06838	102	21.7949
503	clonotype1086	IGK	IGKC	Lc	IGKV5-48	None	IGKJ2	CQQSNSWPYTF	wt	6	1.28205	123	26.2821
504	clonotype1087	IGK	IGKC	Lc	IGKV19-93	None	IGKJ1	CLQYDNLTWTF	wt	19	4.05983	136	29.0598
505	clonotype1088	IGK	IGKC	Lc	IGKV3-5	None	IGKJ1	CQQSNEDPWTF	wt	3	0.641026	136	29.0598
506	clonotype1091	IGK	IGKC	Lc	IGKV14-111	None	IGKJ4	CLQYDEFPPFTF	wt	11	2.35043	80	17.094
507	clonotype1092	IGK	IGKC	Lc	IGKV3-12	None	IGKJ2	CQHSRELPTF	wt	10	2.13675	123	26.2821
508	clonotype1093	IGK	IGKC	Lc	IGKV1-110	None	IGKJ2	CSQSTHVPYTF	wt	10	2.13675	123	26.2821
509	clonotype1096	IGK	IGKC	Lc	IGKV1-135	None	IGKJ1	CWQGTHFPRTF	wt	14	2.99145	136	29.0598
510	clonotype1097	IGK	IGKC	Lc	IGKV5-39	None	IGKJ1	CQNGHSFPRTF	wt	6	1.28205	136	29.0598
511	clonotype1098	IGK	IGKC	Lc	IGKV6-32	None	IGKJ1	CQQDYSSPWTF	wt	5	1.06838	136	29.0598
512	clonotype1099	IGK	IGKC	Lc	IGKV13-84	None	IGKJ4	CQQYWSTFTF	wt	5	1.06838	80	17.094
513	clonotype1101	IGK	IGKC	Lc	IGKV1-122	None	IGKJ1	CLQVTHVPWTF	wt	5	1.06838	136	29.0598
514	clonotype1104	IGK	IGKC	Lc	IGKV3-7	None	IGKJ2	CQHSWEIPYTF	wt	6	1.28205	123	26.2821
515	clonotype1105	IGK	IGKC	Lc	IGKV19-93	None	IGKJ1	CLQYATWTF	wt	19	4.05983	136	29.0598
516	clonotype1106	IGK	IGKC	Lc	IGKV13-85	None	IGKJ2	CQQYWSTPYTF	wt	5	1.06838	123	26.2821
517	clonotype1109	IGK	IGKC	Lc	IGKV4-50	None	IGKJ4	CQQFTSSPFTF	wt	7	1.49573	80	17.094
518	clonotype1110	IGK	IGKC	Lc	IGKV2-109	None	IGKJ1	CAQNLELTWTF	wt	11	2.35043	136	29.0598
519	clonotype1112	IGK	IGKC	Lc	IGKV12-89	None	IGKJ1	CQNVLSTPWTF	wt	4	0.854701	136	29.0598
520	clonotype1113	IGK	IGKC	Lc	IGKV19-93	None	IGKJ1	CLQYDNLLWTF	wt	19	4.05983	136	29.0598
521	clonotype1116	IGK	IGKC	Lc	IGKV3-2	None	IGKJ2	CQQSKEVPYTF	wt	7	1.49573	123	26.2821
522	clonotype1118	IGK	IGKC	Lc	IGKV16-104	None	IGKJ2	CQQHNEYPYTF	wt	5	1.06838	123	26.2821
523	clonotype1119	IGK	IGKC	Lc	IGKV6-15	None	IGKJ4	CQQYNSYIFTF	wt	11	2.35043	80	17.094
524	clonotype1120	IGK	IGKC	Lc	IGKV8-30	None	IGKJ5	CQQYYSYPLTF	wt	7	1.49573	102	21.7949
525	clonotype1121	IGK	IGKC	Lc	IGKV3-5	None	IGKJ2	CQQSNEDPYTF	wt	3	0.641026	123	26.2821
526	clonotype1124	IGK	IGKC	Lc	IGKV10-96	None	IGKJ1	CQQGNTLPWTF	wt	12	2.5641	136	29.0598
527	clonotype1125	IGK	IGKC	Lc	IGKV6-23	None	IGKJ5	CQQYSSYPLTF	wt	8	1.7094	102	21.7949
528	clonotype1126	IGK	IGKC	Lc	IGKV12-44	None	IGKJ5	CQHHYGTPLTF	wt	9	1.92308	102	21.7949
529	clonotype1128	IGK	IGKC	Lc	IGKV3-12	None	IGKJ2	CQHSRELPMYTF	wt	10	2.13675	123	26.2821
530	clonotype1131	IGK	IGKC	Lc	IGKV4-53	None	IGKJ4	CQQWSSYPFTF	wt	5	1.06838	80	17.094
531	clonotype1133	IGK	IGKC	Lc	IGKV4-53	None	IGKJ4	CQQWSSYPLTF	wt	5	1.06838	80	17.094
532	clonotype1134	IGK	IGKC	Lc	IGKV6-20	None	IGKJ4	CGQSYSYPFTF	wt	3	0.641026	80	17.094
533	clonotype1136	IGK	IGKC	Lc	IGKV8-30	None	IGKJ1	CQQYYSYPWTF	wt	7	1.49573	136	29.0598
534	clonotype1138	IGK	IGKC	Lc	IGKV12-41	None	IGKJ1	CQHFWSTPRTF	wt	7	1.49573	136	29.0598
535	clonotype1139	IGK	IGKC	Lc	IGKV9-120	None	IGKJ1	CLQYASSPWTF	wt	5	1.06838	136	29.0598
536	clonotype1140	IGK	IGKC	Lc	IGKV4-59	None	IGKJ5	CQQWSSNPLTF	wt	6	1.28205	102	21.7949
537	clonotype1141	IGK	IGKC	Lc	IGKV13-85	None	IGKJ2	CQQYWSTPPTF	wt	5	1.06838	123	26.2821
538	clonotype1142	IGK	IGKC	Lc	IGKV17-127	None	IGKJ5	CLQSDNMPLTF	wt	8	1.7094	102	21.7949
539	clonotype1143	IGK	IGKC	Lc	IGKV5-43	None	IGKJ2	CQQSNSWPQYTF	wt	9	1.92308	123	26.2821
540	clonotype1145	IGK	IGKC	Lc	IGKV5-39	None	IGKJ5	CQNGHSFPLTF	wt	6	1.28205	102	21.7949
541	clonotype1149	IGK	IGKC	Lc	IGKV3-12	None	IGKJ5	CQHSRELPPTF	wt	10	2.13675	102	21.7949
542	clonotype1152	IGL	IGLC1	Lc	IGLV1	None	IGLJ1	CALWYSNHSWVF	wt	16	3.4188	14	2.99145
543	clonotype1155	IGK	IGKC	Lc	IGKV8-24	None	IGKJ5	CQQHYSTPLTF	wt	3	0.641026	102	21.7949
544	clonotype1156	IGK	IGKC	Lc	IGKV10-96	None	IGKJ2	CQQGNTLPYTF	wt	12	2.5641	123	26.2821
545	clonotype1157	IGK	IGKC	Lc	IGKV10-96	None	IGKJ4	CQQGNTLPFTF	wt	12	2.5641	80	17.094
546	clonotype1159	IGK	IGKC	Lc	IGKV19-93	None	IGKJ2	CLQYDNLYTF	wt	19	4.05983	123	26.2821
547	clonotype1162	IGK	IGKC	Lc	IGKV14-126	None	IGKJ1	CLQHGESPWTF	wt	3	0.641026	136	29.0598
548	clonotype1163	IGL	IGLC1	Lc	IGLV1	None	IGLJ1	CALWYSNHLVF	wt	16	3.4188	14	2.99145
549	clonotype1165	IGK	IGKC	Lc	IGKV17-121	None	IGKJ5	CLQSDNLPLTF	wt	6	1.28205	102	21.7949
550	clonotype1166	IGK	IGKC	Lc	IGKV9-120	None	IGKJ5	CLQYASSPLTF	wt	5	1.06838	102	21.7949
551	clonotype1169	IGK	IGKC	Lc	IGKV10-96	None	IGKJ1	CQQGNTLPRTF	wt	12	2.5641	136	29.0598
552	clonotype1170	IGK	IGKC	Lc	IGKV3-10	None	IGKJ4	CQQNNEDPPFTF	wt	8	1.7094	80	17.094
553	clonotype1172	IGK	IGKC	Lc	IGKV2-137	None	IGKJ2	CMQHLEYPYTF	wt	4	0.854701	123	26.2821
554	clonotype1174	IGK	IGKC	Lc	IGKV8-28	None	IGKJ4	CQNDHSYPFTF	wt	4	0.854701	80	17.094
555	clonotype1175	IGK	None	Lc	IGKV5-45	None	IGKJ1	CQQSNSWPWTF	wt	2	0.42735	136	29.0598
556	clonotype1178	IGK	IGKC	Lc	IGKV4-68	None	IGKJ1	CQQWSSNPTF	wt	1	0.213675	136	29.0598
557	clonotype1180	IGK	IGKC	Lc	IGKV12-41	None	IGKJ1	CQHFWSTPWTF	wt	7	1.49573	136	29.0598
558	clonotype1182	IGK	IGKC	Lc	IGKV3-4	None	IGKJ1	CQQSNEDPRTF	wt	6	1.28205	136	29.0598
559	clonotype1183	IGK	IGKC	Lc	IGKV17-127	None	IGKJ5	CLQSDNMPLQF	wt	8	1.7094	102	21.7949
560	clonotype1189	IGK	IGKC	Lc	IGKV8-27	None	IGKJ2	CHQYLSSYTF	wt	8	1.7094	123	26.2821
561	clonotype1190	IGK	IGKC	Lc	IGKV4-57-1	None	IGKJ5	CQQYSGYPLTF	wt	4	0.854701	102	21.7949
562	clonotype1195	IGK	IGKC	Lc	IGKV17-121	None	IGKJ4	CLQSDNLPFTF	wt	6	1.28205	80	17.094
563	clonotype1197	IGK	IGKC	Lc	IGKV3-10	None	IGKJ1	CQQNNEDPWTF	wt	8	1.7094	136	29.0598
564	clonotype1199	IGK	IGKC	Lc	IGKV14-100	None	IGKJ1	CVQYAQFPWTF	wt	5	1.06838	136	29.0598
565	clonotype1206	IGK	IGKC	Lc	IGKV9-120	None	IGKJ2	CLQYASSPPTF	wt	5	1.06838	123	26.2821
566	clonotype1207	IGL	IGLC3	Lc	IGLV1	None	IGLJ3	CALWYSNQFIF	wt	16	3.4188	5	1.06838
567	clonotype1213	IGK	IGKC	Lc	IGKV5-39	None	IGKJ1	CQNGHSFPWTF	wt	6	1.28205	136	29.0598
568	clonotype1221	IGK	IGKC	Lc	IGKV2-112	None	IGKJ5	CQQLVEYPRTF	wt	4	0.854701	102	21.7949
569	clonotype1222	IGK	IGKC	Lc	IGKV4-57	None	IGKJ5	CQQRSSYPLTF	wt	8	1.7094	102	21.7949
570	clonotype1225	IGK	IGKC	Lc	IGKV2-137	None	IGKJ4	CMQHLEYPFTF	wt	4	0.854701	80	17.094
571	clonotype1230	IGK	IGKC	Lc	IGKV4-61	None	IGKJ1	CQQYHSYPWTF	wt	4	0.854701	136	29.0598
572	clonotype1231	IGK	IGKC	Lc	IGKV5-48	None	IGKJ4	CQQSNSWPTTF	wt	6	1.28205	80	17.094
573	clonotype1233	IGK	IGKC	Lc	IGKV8-21	None	IGKJ1	CKQSYNLWTF	wt	4	0.854701	136	29.0598
574	clonotype1234	IGK	IGKC	Lc	IGKV4-61	None	IGKJ1	CQQYHSYPTF	wt	4	0.854701	136	29.0598
575	clonotype1235	IGK	IGKC	Lc	IGKV14-100	None	IGKJ1	CVQYAQFPRTF	wt	5	1.06838	136	29.0598
576	clonotype1236	IGK	IGKC	Lc	IGKV12-46	None	IGKJ1	CQHFWGTPRTF	wt	8	1.7094	136	29.0598
577	clonotype1239	IGK	IGKC	Lc	IGKV11-125	None	IGKJ2	CLQHSYLPYTF	wt	2	0.42735	123	26.2821
578	clonotype1244	IGL	IGLC2	Lc	IGLV3	None	IGLJ2	CGVGDTIKEHYVF	wt	5	1.06838	8	1.7094
579	clonotype1247	IGK	IGKC	Lc	IGKV14-111	None	IGKJ2	CLQYDEFPYTF	wt	11	2.35043	123	26.2821
580	clonotype1249	IGL	IGLC1	Lc	IGLV2	None	IGLJ1	CALWYSTHLVF	wt	6	1.28205	14	2.99145
581	clonotype1252	IGK	IGKC	Lc	IGKV6-17	None	IGKJ2	CQQHYSTLMYTF	wt	8	1.7094	123	26.2821
582	clonotype1253	IGK	IGKC	Lc	IGKV3-2	None	IGKJ5	CQQSKEVPLTF	wt	7	1.49573	102	21.7949
583	clonotype1257	IGK	IGKC	Lc	IGKV3-10	None	IGKJ2	CQQNNEDPYTF	wt	8	1.7094	123	26.2821
584	clonotype1259	IGK	IGKC	Lc	IGKV19-93	None	IGKJ4	CLQYDNLLFTF	wt	19	4.05983	80	17.094
585	clonotype1261	IGK	IGKC	Lc	IGKV10-96	None	IGKJ5	CQQGNTLTF	wt	12	2.5641	102	21.7949
586	clonotype1264	IGK	IGKC	Lc	IGKV4-91	None	IGKJ4	CQQGSSIPFTF	wt	3	0.641026	80	17.094
587	clonotype1266	IGK	IGKC	Lc	IGKV14-111	None	IGKJ2	CLQYDELYTF	wt	11	2.35043	123	26.2821
588	clonotype1270	IGK	IGKC	Lc	IGKV1-135	None	IGKJ2	CWQGTHFPHTF	wt	14	2.99145	123	26.2821
589	clonotype1271	IGK	IGKC	Lc	IGKV8-28	None	IGKJ5	CQNDHSYPLTF	wt	4	0.854701	102	21.7949
590	clonotype1275	IGK	IGKC	Lc	IGKV9-120	None	IGKJ2	CLQYASSPYTF	wt	5	1.06838	123	26.2821
591	clonotype1277	IGK	IGKC	Lc	IGKV3-4	None	IGKJ2	CQQSMYTF	wt	6	1.28205	123	26.2821
592	clonotype1280	IGK	IGKC	Lc	IGKV19-93	None	IGKJ1	CLQYDNLWTF	wt	19	4.05983	136	29.0598
593	clonotype1284	IGK	IGKC	Lc	IGKV1-110	None	IGKJ4	CSQSTHVPFTF	wt	10	2.13675	80	17.094
594	clonotype1289	IGK	IGKC	Lc	IGKV1-99	None	IGKJ4	CFQSNYLPLTF	wt	6	1.28205	80	17.094
595	clonotype1291	IGK	IGKC	Lc	IGKV1-135	None	IGKJ1	CWQGTHFPWTF	wt	14	2.99145	136	29.0598
596	clonotype1292	IGK	IGKC	Lc	IGKV4-86	None	IGKJ2	CQQWNYPYTF	wt	3	0.641026	123	26.2821
597	clonotype1293	IGK	IGKC	Lc	IGKV5-43	None	IGKJ4	CQQSNSWPFTF	wt	9	1.92308	80	17.094
598	clonotype1296	IGK	IGKC	Lc	IGKV4-50	None	IGKJ1	CQQFTSSPWTF	wt	7	1.49573	136	29.0598
599	clonotype1298	IGK	IGKC	Lc	IGKV8-30	None	IGKJ2	CQQYYSYPYTF	wt	7	1.49573	123	26.2821
600	clonotype1301	IGK	IGKC	Lc	IGKV12-46	None	IGKJ1	CQHFWGTPWTF	wt	8	1.7094	136	29.0598
601	clonotype1305	IGK	IGKC	Lc	IGKV6-13	None	IGKJ5	CQQYSSYPTF	wt	1	0.213675	102	21.7949
602	clonotype1307	IGK	IGKC	Lc	IGKV5-39	None	IGKJ2	CQNGHSFPYTF	wt	6	1.28205	123	26.2821
603	clonotype1308	IGK	IGKC	Lc	IGKV3-2	None	IGKJ1	CQQSKEVPRTF	wt	7	1.49573	136	29.0598
604	clonotype1309	IGK	IGKC	Lc	IGKV3-1	None	IGKJ2	CQQSRKVPYTF	wt	4	0.854701	123	26.2821
605	clonotype1312	IGK	IGKC	Lc	IGKV6-32	None	IGKJ5	CQQDYSSPLTF	wt	5	1.06838	102	21.7949
606	clonotype1314	IGK	IGKC	Lc	IGKV3-4	None	IGKJ1	CQQSNEDPTF	wt	6	1.28205	136	29.0598
607	clonotype1317	IGK	IGKC	Lc	IGKV10-94	None	IGKJ1	CQQYSKLPWTF	wt	4	0.854701	136	29.0598
608	clonotype1321	IGK	IGKC	Lc	IGKV6-17	None	IGKJ1	CQQHYSTPRTF	wt	8	1.7094	136	29.0598
609	clonotype1328	IGK	IGKC	Lc	IGKV12-89	None	IGKJ5	CQNVLSTPLTF	wt	4	0.854701	102	21.7949
610	clonotype1329	IGK	IGKC	Lc	IGKV12-38	None	IGKJ2	CKQAYDVPYTF	wt	5	1.06838	123	26.2821
611	clonotype1331	IGK	IGKC	Lc	IGKV6-17	None	IGKJ4	CQQHYSTPPFTF	wt	8	1.7094	80	17.094
612	clonotype1342	IGK	IGKC	Lc	IGKV1-110	None	IGKJ5	CSQSTHVPTF	wt	10	2.13675	102	21.7949
613	clonotype1346	IGK	IGKC	Lc	IGKV6-23	None	IGKJ2	CQQYSSYPYTF	wt	8	1.7094	123	26.2821
614	clonotype1347	IGK	IGKC	Lc	IGKV1-133	None	IGKJ1	CVQGTHFPRTF	wt	5	1.06838	136	29.0598
615	clonotype1350	IGK	IGKC	Lc	IGKV8-28	None	IGKJ2	CQNDHSYPYTF	wt	4	0.854701	123	26.2821
616	clonotype1356	IGK	IGKC	Lc	IGKV3-10	None	IGKJ1	CQQNNEDPPTF	wt	8	1.7094	136	29.0598
617	clonotype1358	IGK	IGKC	Lc	IGKV1-117	None	IGKJ1	CFQGSHVPTF	wt	9	1.92308	136	29.0598
618	clonotype1359	IGK	IGKC	Lc	IGKV16-104	None	IGKJ1	CQQHNEYPWTF	wt	5	1.06838	136	29.0598
619	clonotype1360	IGK	IGKC	Lc	IGKV1-122	None	IGKJ2	CLQVTHVPYTF	wt	5	1.06838	123	26.2821
620	clonotype1365	IGK	IGKC	Lc	IGKV1-110	None	IGKJ1	CSQSTHVPPTF	wt	10	2.13675	136	29.0598
621	clonotype1370	IGK	IGKC	Lc	IGKV6-15	None	IGKJ2	CQQYNSYPLYTF	wt	11	2.35043	123	26.2821
622	clonotype1372	IGK	IGKC	Lc	IGKV2-137	None	IGKJ2	CMQHLEYPLTF	wt	4	0.854701	123	26.2821
623	clonotype1373	IGK	IGKC	Lc	IGKV14-130	None	IGKJ5	CLQFYEFPLTF	wt	4	0.854701	102	21.7949
624	clonotype1375	IGK	IGKC	Lc	IGKV3-10	None	IGKJ4	CQQNNEDPFTF	wt	8	1.7094	80	17.094
625	clonotype1377	IGK	IGKC	Lc	IGKV19-93	None	IGKJ5	CLQYDNLLTF	wt	19	4.05983	102	21.7949
626	clonotype1379	IGK	IGKC	Lc	IGKV13-84	None	IGKJ1	CQQYWSTPWTF	wt	5	1.06838	136	29.0598
627	clonotype1380	IGK	IGKC	Lc	IGKV12-46	None	IGKJ2	CQHFWGTPYTF	wt	8	1.7094	123	26.2821
628	clonotype1382	IGL	IGLC1	Lc	IGLV1	None	IGLJ1	CALWYSNHFWVF	wt	16	3.4188	14	2.99145
629	clonotype1384	IGK	IGKC	Lc	IGKV9-124	None	IGKJ1	CLQYASYPRTF	wt	5	1.06838	136	29.0598
630	clonotype1395	IGK	IGKC	Lc	IGKV2-109	None	IGKJ1	CAQNLELPWTF	wt	11	2.35043	136	29.0598
631	clonotype1396	IGK	IGKC	Lc	IGKV8-34	None	IGKJ2	CQQSYSAPYTF	wt	2	0.42735	123	26.2821
632	clonotype1402	IGK	IGKC	Lc	IGKV1-110	None	IGKJ1	CSQSTHVPPWTF	wt	10	2.13675	136	29.0598
633	clonotype1405	IGK	IGKC	Lc	IGKV14-111	None	IGKJ4	CLQYDEFPFTF	wt	11	2.35043	80	17.094
634	clonotype1407	IGK	IGKC	Lc	IGKV8-27	None	IGKJ1	CHQYLSSWTF	wt	8	1.7094	136	29.0598
635	clonotype1411	IGK	IGKC	Lc	IGKV10-94	None	IGKJ1	CQQYSKLPPTF	wt	4	0.854701	136	29.0598
636	clonotype1414	IGK	IGKC	Lc	IGKV3-4	None	IGKJ5	CQQSNEDPLTF	wt	6	1.28205	102	21.7949
637	clonotype1417	IGK	IGKC	Lc	IGKV1-117	None	IGKJ2	CFQGSHVPYTF	wt	9	1.92308	123	26.2821
638	clonotype1426	IGK	IGKC	Lc	IGKV3-12	None	IGKJ4	CQHSRELPFTF	wt	10	2.13675	80	17.094
639	clonotype1428	IGK	IGKC	Lc	IGKV12-46	None	IGKJ5	CQHFWGTPLTF	wt	8	1.7094	102	21.7949
640	clonotype1430	IGK	IGKC	Lc	IGKV4-59	None	IGKJ4	CQQWSSNPFTF	wt	6	1.28205	80	17.094
641	clonotype1437	IGK	IGKC	Lc	IGKV1-117	None	IGKJ4	CFQGSHVPFTF	wt	9	1.92308	80	17.094
642	clonotype1445	IGK	IGKC	Lc	IGKV3-12	None	IGKJ1	CQHSRELPRTF	wt	10	2.13675	136	29.0598
643	clonotype1446	IGK	IGKC	Lc	IGKV10-96	None	IGKJ1	CQQGNTLPPTF	wt	12	2.5641	136	29.0598
644	clonotype1447	IGK	IGKC	Lc	IGKV12-38	None	IGKJ1	CKQAYDVPRTF	wt	5	1.06838	136	29.0598
645	clonotype1450	IGK	IGKC	Lc	IGKV10-96	None	IGKJ1	CQQGNTLWTF	wt	12	2.5641	136	29.0598
646	clonotype1451	IGK	IGKC	Lc	IGKV14-111	None	IGKJ5	CLQYDEFPLTF	wt	11	2.35043	102	21.7949
647	clonotype1452	IGK	IGKC	Lc	IGKV1-117	None	IGKJ5	CFQGSHVPPLTF	wt	9	1.92308	102	21.7949
648	clonotype1459	IGK	IGKC	Lc	IGKV8-28	None	IGKJ1	CQNDHSYPRTF	wt	4	0.854701	136	29.0598
649	clonotype1461	IGK	IGKC	Lc	IGKV4-53	None	IGKJ2	CQQWSSYPLITF	wt	5	1.06838	123	26.2821
650	clonotype1464	IGK	IGKC	Lc	IGKV8-27	None	IGKJ2	CHQYLSSRTF	wt	8	1.7094	123	26.2821
651	clonotype1482	IGK	IGKC	Lc	IGKV10-96	None	IGKJ5	CQQGNTLPLTF	wt	12	2.5641	102	21.7949
652	clonotype1489	IGK	IGKC	Lc	IGKV4-80	None	IGKJ1	CHQWSSYPWTF	wt	6	1.28205	136	29.0598
653	clonotype1490	IGK	IGKC	Lc	IGKV8-19	None	IGKJ5	CQNDYSYPPLTF	wt	3	0.641026	102	21.7949
654	clonotype1494	IGK	IGKC	Lc	IGKV6-20	None	IGKJ5	CGQSYSYPLTF	wt	3	0.641026	102	21.7949
655	clonotype1497	IGK	IGKC	Lc	IGKV5-39	None	IGKJ1	CQNGHSFPPTF	wt	6	1.28205	136	29.0598
656	clonotype1499	IGK	IGKC	Lc	IGKV1-133	None	IGKJ2	CVQGTHFPYTF	wt	5	1.06838	123	26.2821
657	clonotype1505	IGK	None	Lc	IGKV3-12	None	IGKJ5	CQHSRELPLTF	wt	10	2.13675	102	21.7949
658	clonotype150	IGK	IGKC	Lc	IGKV4-80	None	IGKJ2	CHQWSSYPYTF	wt	6	1.28205	123	26.2821
659	clonotype1511	IGK	IGKC	Lc	IGKV1-117	None	IGKJ1	CFQGSHVPPTF	wt	9	1.92308	136	29.0598
660	clonotype1513	IGK	IGKC	Lc	IGKV10-96	None	IGKJ1	CQQGNTLPTF	wt	12	2.5641	136	29.0598
661	clonotype1517	IGK	None	Lc	IGKV8-30	None	IGKJ1	CQQYYSYPRTF	wt	7	1.49573	136	29.0598
662	clonotype1527	IGK	IGKC	Lc	IGKV5-39	None	IGKJ4	CQNGHSFPFTF	wt	6	1.28205	80	17.094
663	clonotype1528	IGK	IGKC	Lc	IGKV4-50	None	IGKJ1	CQQFTSSPSMWTF	wt	7	1.49573	136	29.0598
664	clonotype1529	IGK	IGKC	Lc	IGKV4-91	None	IGKJ2	CQQGSSIPRTF	wt	3	0.641026	123	26.2821
665	clonotype1538	IGK	IGKC	Lc	IGKV6-23	None	IGKJ4	CQQYSSYPFTF	wt	8	1.7094	80	17.094
666	clonotype1540	IGK	IGKC	Lc	IGKV17-121	None	IGKJ2	CLQSDNLPYTF	wt	6	1.28205	123	26.2821
667	clonotype1541	IGK	IGKC	Lc	IGKV5-48	None	IGKJ5	CQQSNSWPLTF	wt	6	1.28205	102	21.7949
668	clonotype1543	IGK	IGKC	Lc	IGKV4-86	None	IGKJ4	CQQWNYPFTF	wt	3	0.641026	80	17.094
669	clonotype1556	IGK	IGKC	Lc	IGKV13-84	None	IGKJ5	CQQYWSTLTF	wt	5	1.06838	102	21.7949
670	clonotype1561	IGK	IGKC	Lc	IGKV2-109	None	IGKJ1	CAQNLELWTF	wt	11	2.35043	136	29.0598
671	clonotype1563	IGK	IGKC	Lc	IGKV4-80	None	IGKJ1	CHQWSSYRTF	wt	6	1.28205	136	29.0598
672	clonotype1569	IGK	IGKC	Lc	IGKV6-15	None	IGKJ5	CQQYNSYPLTF	wt	11	2.35043	102	21.7949
673	clonotype1572	IGK	IGKC	Lc	IGKV4-59	None	IGKJ2	CQQWSSNPPTF	wt	6	1.28205	123	26.2821
674	clonotype1578	IGK	IGKC	Lc	IGKV3-12	None	IGKJ5	CQHSRELLTF	wt	10	2.13675	102	21.7949
675	clonotype1590	IGK	IGKC	Lc	IGKV10-96	None	IGKJ1	CQQGNTLPPWTF	wt	12	2.5641	136	29.0598
676	clonotype1599	IGK	IGKC	Lc	IGKV5-43	None	IGKJ2	CQQSNSWPQTF	wt	9	1.92308	123	26.2821
677	clonotype1611	IGK	IGKC	Lc	IGKV19-93	None	IGKJ1	CLQYDNLPTWTF	wt	19	4.05983	136	29.0598
678	clonotype1613	IGK	IGKC	Lc	IGKV14-130	None	IGKJ2	CLQFYEFPYTF	wt	4	0.854701	123	26.2821
679	clonotype1621	IGK	IGKC	Lc	IGKV3-1	None	IGKJ1	CQQSRKVPSF	wt	4	0.854701	136	29.0598
680	clonotype1623	IGL	IGLC1	Lc	IGLV1	None	IGLJ1	CALWYSNLWVF	wt	16	3.4188	14	2.99145
681	clonotype1640	IGK	IGKC	Lc	IGKV17-127	None	IGKJ2	CLQSDNMPLYTF	wt	8	1.7094	123	26.2821
682	clonotype1649	IGK	IGKC	Lc	IGKV4-74	None	IGKJ5	CQQWNYPLITF	wt	4	0.854701	102	21.7949
683	clonotype1653	IGK	IGKC	Lc	IGKV12-44	None	IGKJ5	CQHHYGTPPTF	wt	9	1.92308	102	21.7949
684	clonotype1658	IGK	IGKC	Lc	IGKV9-124	None	IGKJ4	CLQYASYPFTF	wt	5	1.06838	80	17.094
685	clonotype1662	IGK	IGKC	Lc	IGKV1-117	None	IGKJ5	CFQGSHVPLTF	wt	9	1.92308	102	21.7949
686	clonotype1665	IGK	IGKC	Lc	IGKV6-25	None	IGKJ1	CQQHYSTPTF	wt	4	0.854701	136	29.0598
687	clonotype1673	IGK	IGKC	Lc	IGKV6-15	None	IGKJ2	CQQYNSYPYTF	wt	11	2.35043	123	26.2821
688	clonotype1677	IGK	IGKC	Lc	IGKV1-135	None	IGKJ4	CWQGTHFPFTF	wt	14	2.99145	80	17.094
689	clonotype1682	IGK	IGKC	Lc	IGKV6-25	None	IGKJ1	CQQHYSTPPWTF	wt	4	0.854701	136	29.0598
690	clonotype1684	IGK	IGKC	Lc	IGKV6-20	None	IGKJ2	CGQSYSYPYTF	wt	3	0.641026	123	26.2821
691	clonotype1692	IGK	IGKC	Lc	IGKV4-69	None	IGKJ4	CHQRSSYPFTF	wt	2	0.42735	80	17.094
692	clonotype1695	IGK	IGKC	Lc	IGKV6-15	None	IGKJ4	CQQYNSYPFTF	wt	11	2.35043	80	17.094
693	clonotype1702	IGK	IGKC	Lc	IGKV4-57	None	IGKJ4	CQQRSSYPFTF	wt	8	1.7094	80	17.094
694	clonotype1715	IGL	IGLC1	Lc	IGLV1	None	IGLJ1	CALWYSNRWVF	wt	16	3.4188	14	2.99145
695	clonotype1724	IGK	IGKC	Lc	IGKV14-126	None	IGKJ4	CLQHGESPFTF	wt	3	0.641026	80	17.094
696	clonotype1727	IGK	IGKC	Lc	IGKV4-61	None	IGKJ5	CQQYHSYPLTF	wt	4	0.854701	102	21.7949
697	clonotype1729	IGK	IGKC	Lc	IGKV3-2	None	IGKJ1	CQQSKEVPPTF	wt	7	1.49573	136	29.0598
698	clonotype1733	IGK	IGKC	Lc	IGKV4-58	None	IGKJ5	CQQWSGYPFTF	wt	4	0.854701	102	21.7949
699	clonotype1739	IGK	IGKC	Lc	IGKV1-88	None	IGKJ1	CLQGTHQPWTF	wt	4	0.854701	136	29.0598
700	clonotype1753	IGK	IGKC	Lc	IGKV4-53	None	IGKJ1	CQQWSSYPRTF	wt	5	1.06838	136	29.0598
701	clonotype1771	IGK	IGKC	Lc	IGKV8-27	None	IGKJ4	CHQYLSSIFTF	wt	8	1.7094	80	17.094
702	clonotype1775	IGK	IGKC	Lc	IGKV5-48	None	IGKJ5	CQQSNSWPITF	wt	6	1.28205	102	21.7949
703	clonotype1783	IGK	IGKC	Lc	IGKV3-1	None	IGKJ1	CQQSRKVPWTF	wt	4	0.854701	136	29.0598
704	clonotype1794	IGK	IGKC	Lc	IGKV12-44	None	IGKJ2	CQHHYGTPYTF	wt	9	1.92308	123	26.2821
705	clonotype1795	IGK	IGKC	Lc	IGKV1-99	None	IGKJ4	CFQSNYLIFTF	wt	6	1.28205	80	17.094
706	clonotype1809	IGK	IGKC	Lc	IGKV2-109	None	IGKJ4	CAQNLELPFTF	wt	11	2.35043	80	17.094
707	clonotype1815	IGK	IGKC	Lc	IGKV4-58	None	IGKJ2	CQQWSGYPYTF	wt	4	0.854701	123	26.2821
708	clonotype1821	IGK	IGKC	Lc	IGKV3-10	None	IGKJ2	CQQNNEDPYMYTF	wt	8	1.7094	123	26.2821
709	clonotype1822	IGK	IGKC	Lc	IGKV19-93	None	IGKJ2	CLQYDNLLMYTF	wt	19	4.05983	123	26.2821
710	clonotype1832	IGK	IGKC	Lc	IGKV14-111	None	IGKJ5	CLQYDEFPPLTF	wt	11	2.35043	102	21.7949
711	clonotype1833	IGK	IGKC	Lc	IGKV5-48	None	IGKJ5	CQQSNSWPTLTF	wt	6	1.28205	102	21.7949
712	clonotype1837	IGK	IGKC	Lc	IGKV3-7	None	IGKJ1	CQHSWEIPWTF	wt	6	1.28205	136	29.0598
713	clonotype1839	IGK	IGKC	Lc	IGKV1-110	None	IGKJ1	CSQSTHVPWTF	wt	10	2.13675	136	29.0598
714	clonotype1842	IGK	IGKC	Lc	IGKV4-57	None	IGKJ5	CQQRRSYPPTF	wt	8	1.7094	102	21.7949
715	clonotype1845	IGK	IGKC	Lc	IGKV1-122	None	IGKJ4	CLQVTHVPFTF	wt	5	1.06838	80	17.094
716	clonotype1847	IGK	IGKC	Lc	IGKV1-122	None	IGKJ5	CLQVTHVPLTF	wt	5	1.06838	102	21.7949
717	clonotype1850	IGL	IGLC2	Lc	IGLV2	None	IGLJ2	CALWYSTHFVF	wt	6	1.28205	8	1.7094
718	clonotype1853	IGK	IGKC	Lc	IGKV4-50	None	IGKJ2	CQQFTSSPYMYTF	wt	7	1.49573	123	26.2821
719	clonotype1866	IGK	IGKC	Lc	IGKV6-15	None	IGKJ2	CQQYNSYMYTF	wt	11	2.35043	123	26.2821
720	clonotype1888	IGL	IGLC2	Lc	IGLV2	None	IGLJ2	CALWYSTHNYVF	wt	6	1.28205	8	1.7094
721	clonotype1899	IGK	IGKC	Lc	IGKV4-70	None	IGKJ1	CHQRSSYPWTF	wt	6	1.28205	136	29.0598
722	clonotype1906	IGK	IGKC	Lc	IGKV4-57	None	IGKJ2	CQQRSSYPYTF	wt	8	1.7094	123	26.2821
723	clonotype1911	IGK	IGKC	Lc	IGKV5-45	None	IGKJ1	CQQSNSWPRTF	wt	2	0.42735	136	29.0598
724	clonotype1925	IGK	IGKC	Lc	IGKV6-15	None	IGKJ4	CQQYNSYPIFTF	wt	11	2.35043	80	17.094
725	clonotype1932	IGK	IGKC	Lc	IGKV8-16	None	IGKJ5	CQQHLHIPLTF	wt	6	1.28205	102	21.7949
726	clonotype1934	IGK	IGKC	Lc	IGKV6-17	None	IGKJ1	CQQHYSTRTF	wt	8	1.7094	136	29.0598
727	clonotype1939	IGK	IGKC	Lc	IGKV17-121	None	IGKJ5	CLQSDNLPLAF	wt	6	1.28205	102	21.7949
728	clonotype1945	IGK	IGKC	Lc	IGKV6-17	None	IGKJ2	CQQHYSTYTF	wt	8	1.7094	123	26.2821
729	clonotype1953	IGK	IGKC	Lc	IGKV15-103	None	IGKJ1	CQQGQSYPWTF	wt	7	1.49573	136	29.0598
730	clonotype1957	IGK	IGKC	Lc	IGKV12-46	None	IGKJ5	CQHFWGTPPLTF	wt	8	1.7094	102	21.7949
731	clonotype1959	IGK	IGKC	Lc	IGKV2-109	None	IGKJ5	CAQNLELLTF	wt	11	2.35043	102	21.7949
732	clonotype1960	IGK	IGKC	Lc	IGKV9-124	None	IGKJ2	CLQYASYPYTF	wt	5	1.06838	123	26.2821
733	clonotype1970	IGK	IGKC	Lc	IGKV8-21	None	IGKJ1	CKQSYNLRTF	wt	4	0.854701	136	29.0598
734	clonotype1975	IGK	IGKC	Lc	IGKV12-41	None	IGKJ4	CQHFWSTPFTF	wt	7	1.49573	80	17.094
735	clonotype1978	IGK	None	Lc	IGKV4-59	None	IGKJ5	CQQWSSNPPITF	wt	6	1.28205	102	21.7949
736	clonotype1984	IGK	IGKC	Lc	IGKV6-25	None	IGKJ4	CQQHYSTIFTF	wt	4	0.854701	80	17.094
737	clonotype1989	IGK	IGKC	Lc	IGKV4-57-1	None	IGKJ2	CQQYSGYPYTF	wt	4	0.854701	123	26.2821
738	clonotype2006	IGK	IGKC	Lc	IGKV15-103	None	IGKJ4	CQQGQSYPFTF	wt	7	1.49573	80	17.094
739	clonotype2009	IGK	IGKC	Lc	IGKV13-85	None	IGKJ4	CQQYWSTPFTF	wt	5	1.06838	80	17.094
740	clonotype2019	IGK	IGKC	Lc	IGKV19-93	None	IGKJ4	CLQYDNLIFTF	wt	19	4.05983	80	17.094
741	clonotype2020	IGK	IGKC	Lc	IGKV3-7	None	IGKJ4	CQHSWEIPFTF	wt	6	1.28205	80	17.094
742	clonotype2021	IGK	IGKC	Lc	IGKV1-122	None	IGKJ2	CLQVTHVPPTF	wt	5	1.06838	123	26.2821
743	clonotype2024	IGK	IGKC	Lc	IGKV12-46	None	IGKJ4	CQHFWGTPFTF	wt	8	1.7094	80	17.094
744	clonotype2051	IGK	IGKC	Lc	IGKV1-135	None	IGKJ1	CWQGTHFWTF	wt	14	2.99145	136	29.0598
745	clonotype2066	IGK	IGKC	Lc	IGKV19-93	None	IGKJ1	CLQYDNLRTF	wt	19	4.05983	136	29.0598
746	clonotype2078	IGK	IGKC	Lc	IGKV4-78	None	IGKJ1	CQQWSSNPRTF	wt	1	0.213675	136	29.0598
747	clonotype2090	IGK	IGKC	Lc	IGKV4-50	None	IGKJ2	CQQFTSSPYTF	wt	7	1.49573	123	26.2821
748	clonotype2097	IGK	IGKC	Lc	IGKV6-14	None	IGKJ2	CLQHWNYPYTF	wt	2	0.42735	123	26.2821
749	clonotype2114	IGK	IGKC	Lc	IGKV1-133	None	IGKJ2	CVQGTHFPHTF	wt	5	1.06838	123	26.2821
750	clonotype2118	IGK	IGKC	Lc	IGKV4-79	None	IGKJ2	CHQWSSYPPTF	wt	4	0.854701	123	26.2821
751	clonotype2126	IGK	IGKC	Lc	IGKV12-41	None	IGKJ2	CQHFWSTPYTF	wt	7	1.49573	123	26.2821
752	clonotype2145	IGK	IGKC	Lc	IGKV9-124	None	IGKJ5	CLQYASYPPLTF	wt	5	1.06838	102	21.7949
753	clonotype2149	IGK	IGKC	Lc	IGKV17-127	None	IGKJ4	CLQSDNIFTF	wt	8	1.7094	80	17.094
754	clonotype2158	IGK	IGKC	Lc	IGKV5-43	None	IGKJ5	CQQSNSWPHAF	wt	9	1.92308	102	21.7949
755	clonotype2164	IGK	IGKC	Lc	IGKV1-88	None	IGKJ1	CLQGTHQPPTF	wt	4	0.854701	136	29.0598
756	clonotype2188	IGK	IGKC	Lc	IGKV17-127	None	IGKJ5	CLQSDNMLTF	wt	8	1.7094	102	21.7949
757	clonotype2189	IGK	IGKC	Lc	IGKV9-120	None	IGKJ4	CLQYASSPFTF	wt	5	1.06838	80	17.094
758	clonotype2206	IGK	IGKC	Lc	IGKV19-93	None	IGKJ5	CLQYDNLLLTF	wt	19	4.05983	102	21.7949
759	clonotype2214	IGK	IGKC	Lc	IGKV4-50	None	IGKJ2	CQQFTSSPSMYTF	wt	7	1.49573	123	26.2821
760	clonotype221	IGK	IGKC	Lc	IGKV4-70	None	IGKJ2	CHQRSSYTF	wt	6	1.28205	123	26.2821
761	clonotype2229	IGK	IGKC	Lc	IGKV12-98	None	IGKJ2	CQQLYSTPYTF	wt	3	0.641026	123	26.2821
762	clonotype2240	IGK	IGKC	Lc	IGKV2-109	None	IGKJ2	CAQNLELPTF	wt	11	2.35043	123	26.2821
763	clonotype2258	IGK	IGKC	Lc	IGKV9-124	None	IGKJ1	CLQYASYPWTF	wt	5	1.06838	136	29.0598
764	clonotype2260	IGK	IGKC	Lc	IGKV4-79	None	IGKJ5	CHQWSSYPLTF	wt	4	0.854701	102	21.7949
765	clonotype2268	IGK	IGKC	Lc	IGKV12-98	None	IGKJ1	CQQLYSTPLTF	wt	3	0.641026	136	29.0598
766	clonotype2271	IGK	IGKC	Lc	IGKV10-94	None	IGKJ1	CQQYSKLPRTF	wt	4	0.854701	136	29.0598
767	clonotype2273	IGK	IGKC	Lc	IGKV17-121	None	IGKJ4	CLQSDNLPLFTF	wt	6	1.28205	80	17.094
768	clonotype2274	IGK	IGKC	Lc	IGKV12-44	None	IGKJ4	CQHHYGTPFTF	wt	9	1.92308	80	17.094
769	clonotype2275	IGK	IGKC	Lc	IGKV6-17	None	IGKJ5	CQQHYSTPPLTF	wt	8	1.7094	102	21.7949
770	clonotype2285	IGK	IGKC	Lc	IGKV19-93	None	IGKJ1	CLQYDNLLRTF	wt	19	4.05983	136	29.0598
771	clonotype2287	IGK	IGKC	Lc	IGKV2-137	None	IGKJ1	CMQHLEYPWTF	wt	4	0.854701	136	29.0598
772	clonotype2313	IGK	IGKC	Lc	IGKV4-79	None	IGKJ2	CHQWSSYPPYTF	wt	4	0.854701	123	26.2821
773	clonotype2321	IGK	IGKC	Lc	IGKV6-15	None	IGKJ5	CQQYNSFTF	wt	11	2.35043	102	21.7949
774	clonotype2322	IGK	IGKC	Lc	IGKV12-44	None	IGKJ1	CQHHYGTPRTF	wt	9	1.92308	136	29.0598
775	clonotype2328	IGK	IGKC	Lc	IGKV7-33	None	IGKJ2	CAQFYSYPFTF	wt	2	0.42735	123	26.2821
776	clonotype2342	IGK	IGKC	Lc	IGKV4-63	None	IGKJ5	CFQGSGYPLTF	wt	2	0.42735	102	21.7949
777	clonotype2375	IGK	IGKC	Lc	IGKV4-70	None	IGKJ2	CHQRSSYYTF	wt	6	1.28205	123	26.2821
778	clonotype2382	IGK	IGKC	Lc	IGKV12-44	None	IGKJ1	CQHHYGTPPWTF	wt	9	1.92308	136	29.0598
779	clonotype2396	IGK	IGKC	Lc	IGKV2-112	None	IGKJ1	CQQLVEYPWTF	wt	4	0.854701	136	29.0598
780	clonotype2402	IGK	IGKC	Lc	IGKV5-43	None	IGKJ2	CQQSNSWYTF	wt	9	1.92308	123	26.2821
781	clonotype2408	IGK	IGKC	Lc	IGKV19-93	None	IGKJ1	CLQYDNLGTF	wt	19	4.05983	136	29.0598
782	clonotype2412	IGK	IGKC	Lc	IGKV4-80	None	IGKJ4	CHQWSSFTF	wt	6	1.28205	80	17.094
783	clonotype2417	IGK	IGKC	Lc	IGKV6-14	None	IGKJ4	CLQHWNYPLTF	wt	2	0.42735	80	17.094
784	clonotype2431	IGK	IGKC	Lc	IGKV19-93	None	IGKJ2	CLQYDNLLYMYTF	wt	19	4.05983	123	26.2821
785	clonotype2437	IGK	IGKC	Lc	IGKV3-12	None	IGKJ4	CQHSRELIFTF	wt	10	2.13675	80	17.094
786	clonotype2440	IGK	IGKC	Lc	IGKV15-103	None	IGKJ1	CQQGQSYPRTF	wt	7	1.49573	136	29.0598
787	clonotype2459	IGK	IGKC	Lc	IGKV3-7	None	IGKJ4	CQHSWEIPPTF	wt	6	1.28205	80	17.094
788	clonotype2470	IGK	IGKC	Lc	IGKV4-70	None	IGKJ2	CHQRSSYPYTF	wt	6	1.28205	123	26.2821
789	clonotype2488	IGK	IGKC	Lc	IGKV1-99	None	IGKJ4	CFQSNYLPFTF	wt	6	1.28205	80	17.094
790	clonotype2494	IGK	IGKC	Lc	IGKV6-23	None	IGKJ1	CQQYSSYRTF	wt	8	1.7094	136	29.0598
791	clonotype2497	IGK	IGKC	Lc	IGKV15-103	None	IGKJ2	CQQGQSYTF	wt	7	1.49573	123	26.2821
792	clonotype2506	IGK	IGKC	Lc	IGKV2-109	None	IGKJ2	CAQNLELPYTF	wt	11	2.35043	123	26.2821
793	clonotype250	IGK	IGKC	Lc	IGKV4-80	None	IGKJ1	CHQWSSYPTF	wt	6	1.28205	136	29.0598
794	clonotype2529	IGK	IGKC	Lc	IGKV3-7	None	IGKJ4	CQHSWEITF	wt	6	1.28205	80	17.094
795	clonotype2541	IGK	IGKC	Lc	IGKV1-135	None	IGKJ1	CWQGTHLWTF	wt	14	2.99145	136	29.0598
796	clonotype2546	IGK	IGKC	Lc	IGKV4-57-1	None	IGKJ2	CQQYSGYPLYTF	wt	4	0.854701	123	26.2821
797	clonotype2550	IGK	IGKC	Lc	IGKV3-1	None	IGKJ5	CQQSRKVPLTF	wt	4	0.854701	102	21.7949
798	clonotype2556	IGK	IGKC	Lc	IGKV4-57-1	None	IGKJ1	CQQYSGYPWTF	wt	4	0.854701	136	29.0598
799	clonotype2558	IGK	IGKC	Lc	IGKV3-10	None	IGKJ1	CQQNNEDPTWTF	wt	8	1.7094	136	29.0598
800	clonotype2574	IGK	IGKC	Lc	IGKV4-59	None	IGKJ1	CQQWSSNPWTF	wt	6	1.28205	136	29.0598
801	clonotype2589	IGK	IGKC	Lc	IGKV13-85	None	IGKJ1	CQQYWSTPRTF	wt	5	1.06838	136	29.0598
802	clonotype2608	IGK	IGKC	Lc	IGKV1-110	None	IGKJ5	CSQSTHVPLTF	wt	10	2.13675	102	21.7949
803	clonotype2617	IGK	IGKC	Lc	IGKV14-111	None	IGKJ5	CLQYDEFPALTF	wt	11	2.35043	102	21.7949
804	clonotype2625	IGL	IGLC2	Lc	IGLV3	None	IGLJ2	CGVGDTIKEQYVF	wt	5	1.06838	8	1.7094
805	clonotype2638	IGK	IGKC	Lc	IGKV1-99	None	IGKJ2	CFQSNYLPLYTF	wt	6	1.28205	123	26.2821
806	clonotype2648	IGL	IGLC1	Lc	IGLV1	None	IGLJ1	CALWYHWVF	wt	16	3.4188	14	2.99145
807	clonotype2653	IGK	IGKC	Lc	IGKV12-41	None	IGKJ2	CQHFWSTPYMYTF	wt	7	1.49573	123	26.2821
808	clonotype2655	IGK	IGKC	Lc	IGKV8-30	None	IGKJ5	CQQYYSYPPELTF	wt	7	1.49573	102	21.7949
809	clonotype2663	IGK	IGKC	Lc	IGKV8-30	None	IGKJ5	CQQYYSYLTF	wt	7	1.49573	102	21.7949
810	clonotype2672	IGK	IGKC	Lc	IGKV17-127	None	IGKJ4	CLQSDNMPFTF	wt	8	1.7094	80	17.094
811	clonotype2674	IGK	IGKC	Lc	IGKV4-79	None	IGKJ4	CHQWSSYPFTF	wt	4	0.854701	80	17.094
812	clonotype2678	IGK	IGKC	Lc	IGKV1-135	None	IGKJ1	CWQGTHFRTF	wt	14	2.99145	136	29.0598
813	clonotype2693	IGK	IGKC	Lc	IGKV12-38	None	IGKJ1	CKQAYDVPWTF	wt	5	1.06838	136	29.0598
814	clonotype2694	IGK	IGKC	Lc	IGKV16-104	None	IGKJ4	CQQHNEYPFTF	wt	5	1.06838	80	17.094
815	clonotype2711	IGK	IGKC	Lc	IGKV2-109	None	IGKJ1	CAQNLELPRTF	wt	11	2.35043	136	29.0598
816	clonotype2730	IGK	IGKC	Lc	IGKV4-55	None	IGKJ5	CQQWSSYPPTF	wt	1	0.213675	102	21.7949
817	clonotype2748	IGK	IGKC	Lc	IGKV6-23	None	IGKJ1	CQQYSSYPWTF	wt	8	1.7094	136	29.0598
818	clonotype2753	IGK	IGKC	Lc	IGKV4-80	None	IGKJ2	CHQWSSYPCTF	wt	6	1.28205	123	26.2821
819	clonotype2764	IGK	IGKC	Lc	IGKV8-21	None	IGKJ5	CKQSYNLLTF	wt	4	0.854701	102	21.7949
820	clonotype2788	IGK	IGKC	Lc	IGKV13-84	None	IGKJ2	CQQYWSTMYTF	wt	5	1.06838	123	26.2821
821	clonotype2799	IGK	IGKC	Lc	IGKV6-15	None	IGKJ1	CQQYNSYPWTF	wt	11	2.35043	136	29.0598
822	clonotype2806	IGK	IGKC	Lc	IGKV7-33	None	IGKJ4	CAQFYSYIFTF	wt	2	0.42735	80	17.094
823	clonotype2820	IGK	IGKC	Lc	IGKV6-23	None	IGKJ5	CQQYSSYLTF	wt	8	1.7094	102	21.7949
824	clonotype2838	IGK	IGKC	Lc	IGKV4-72	None	IGKJ4	CQQWSSNPPFTF	wt	3	0.641026	80	17.094
825	clonotype2855	IGK	IGKC	Lc	IGKV1-110	None	IGKJ5	CSQSTHVPPLTF	wt	10	2.13675	102	21.7949
826	clonotype2880	IGK	IGKC	Lc	IGKV5-43	None	IGKJ2	CQQSNSWPHMYTF	wt	9	1.92308	123	26.2821
827	clonotype2918	IGK	IGKC	Lc	IGKV8-18	None	IGKJ2	CQHNHGSFLPYTF	wt	1	0.213675	123	26.2821
828	clonotype2922	IGK	IGKC	Lc	IGKV14-111	None	IGKJ5	CLQYDEFPPTF	wt	11	2.35043	102	21.7949
829	clonotype2937	IGK	IGKC	Lc	IGKV5-43	None	IGKJ5	CQQSNSWPQLTF	wt	9	1.92308	102	21.7949
830	clonotype2942	IGK	IGKC	Lc	IGKV5-43	None	IGKJ5	CQQSNSWLTF	wt	9	1.92308	102	21.7949
831	clonotype2947	IGK	IGKC	Lc	IGKV4-74	None	IGKJ2	CHQYHRSPYTF	wt	4	0.854701	123	26.2821
832	clonotype297	IGK	IGKC	Lc	IGKV4-63	None	IGKJ2	CFQGSGYPYTF	wt	2	0.42735	123	26.2821
833	clonotype308	IGK	IGKC	Lc	IGKV5-43	None	IGKJ5	CQQSNSWPHTF	wt	9	1.92308	102	21.7949
834	clonotype316	IGK	IGKC	Lc	IGKV14-111	None	IGKJ1	CLQYDEFPRTF	wt	11	2.35043	136	29.0598
835	clonotype334	IGK	IGKC	Lc	IGKV2-109	None	IGKJ1	CAQNLELPPTF	wt	11	2.35043	136	29.0598
836	clonotype339	IGK	IGKC	Lc	IGKV11-125	None	IGKJ1	CLQHSYLPWTF	wt	2	0.42735	136	29.0598
837	clonotype341	IGK	IGKC	Lc	IGKV4-69	None	IGKJ5	CHQRSSSF	wt	2	0.42735	102	21.7949
838	clonotype351	IGK	IGKC	Lc	IGKV8-19	None	IGKJ4	CQNDYSYPFTF	wt	3	0.641026	80	17.094
839	clonotype363	IGK	IGKC	Lc	IGKV3-10	None	IGKJ1	CQQNNEDPRTF	wt	8	1.7094	136	29.0598
840	clonotype375	IGK	IGKC	Lc	IGKV2-112	None	IGKJ4	CQQLVEYPFTF	wt	4	0.854701	80	17.094
841	clonotype395	IGK	IGKC	Lc	IGKV12-46	None	IGKJ5	CQHFWGTLTF	wt	8	1.7094	102	21.7949
842	clonotype397	IGK	IGKC	Lc	IGKV4-53	None	IGKJ2	CQQWSSYPYTF	wt	5	1.06838	123	26.2821
843	clonotype410	IGK	IGKC	Lc	IGKV12-98	None	IGKJ1	CQQLYSTPWTF	wt	3	0.641026	136	29.0598
844	clonotype423	IGK	IGKC	Lc	IGKV13-84	None	IGKJ1	CQQYWSTWTF	wt	5	1.06838	136	29.0598
845	clonotype424	IGK	IGKC	Lc	IGKV1-133	None	IGKJ1	CVQGTHFPWTF	wt	5	1.06838	136	29.0598
846	clonotype430	IGK	IGKC	Lc	IGKV4-57	None	IGKJ2	CQQRSSYMYTF	wt	8	1.7094	123	26.2821
847	clonotype437	IGL	IGLC2	Lc	IGLV3	None	IGLJ2	CGVGDTIKEQFVF	wt	5	1.06838	8	1.7094
848	clonotype455	IGL	IGLC3	Lc	IGLV1	None	IGLJ3	CALWYSNHCIF	wt	16	3.4188	5	1.06838
849	clonotype461	IGK	IGKC	Lc	IGKV1-135	None	IGKJ1	CWQGTHFPHPF	wt	14	2.99145	136	29.0598
850	clonotype471	IGK	IGKC	Lc	IGKV12-44	None	IGKJ1	CQHHYGTPWTF	wt	9	1.92308	136	29.0598
851	clonotype481	IGK	IGKC	Lc	IGKV14-100	None	IGKJ2	CVQYAQFPMYTF	wt	5	1.06838	123	26.2821
852	clonotype490	IGK	IGKC	Lc	IGKV1-110	None	IGKJ2	CSQSTHVPHTF	wt	10	2.13675	123	26.2821
853	clonotype493	IGK	IGKC	Lc	IGKV12-44	None	IGKJ2	CQHHYGTPYMYTF	wt	9	1.92308	123	26.2821
854	clonotype495	IGK	IGKC	Lc	IGKV4-72	None	IGKJ2	CQQWSSSPQYTF	wt	3	0.641026	123	26.2821
855	clonotype501	IGK	IGKC	Lc	IGKV12-41	None	IGKJ4	CQHFWSTFTF	wt	7	1.49573	80	17.094
856	clonotype507	IGK	IGKC	Lc	IGKV10-95	None	IGKJ2	CQQYSKLPPYTF	wt	3	0.641026	123	26.2821
857	clonotype529	IGK	IGKC	Lc	IGKV10-96	None	IGKJ2	CQQGNTLPPYTF	wt	12	2.5641	123	26.2821
858	clonotype533	IGK	IGKC	Lc	IGKV2-112	None	IGKJ5	CQQLVEYPLTF	wt	4	0.854701	102	21.7949
859	clonotype538	IGK	IGKC	Lc	IGKV4-91	None	IGKJ2	CQQGSSIPYTF	wt	3	0.641026	123	26.2821
860	clonotype548	IGK	IGKC	Lc	IGKV5-48	None	IGKJ5	CQQSNSWPALTF	wt	6	1.28205	102	21.7949
861	clonotype588	IGK	IGKC	Lc	IGKV6-17	None	IGKJ5	CQQHYSTLTF	wt	8	1.7094	102	21.7949
862	clonotype620	IGK	IGKC	Lc	IGKV14-130	None	IGKJ1	CLQFYEFPPTF	wt	4	0.854701	136	29.0598
863	clonotype622	IGK	IGKC	Lc	IGKV1-99	None	IGKJ1	CFQSNYLPWTF	wt	6	1.28205	136	29.0598
864	clonotype640	IGK	IGKC	Lc	IGKV12-44	None	IGKJ1	CQHHYGTWTF	wt	9	1.92308	136	29.0598
865	clonotype642	IGK	IGKC	Lc	IGKV12-38	None	IGKJ5	CKQAYDVPLTF	wt	5	1.06838	102	21.7949
866	clonotype673	IGK	IGKC	Lc	IGKV4-74	None	IGKJ5	CHQYHRSPPTF	wt	4	0.854701	102	21.7949
867	clonotype716	IGK	IGKC	Lc	IGKV12-89	None	IGKJ2	CQNVLSTPYTF	wt	4	0.854701	123	26.2821
868	clonotype736	IGK	IGKC	Lc	IGKV19-93	None	IGKJ4	CLQYDNLFTF	wt	19	4.05983	80	17.094
869	clonotype738	IGK	IGKC	Lc	IGKV12-41	None	IGKJ5	CQHFWSTPLTF	wt	7	1.49573	102	21.7949
870	clonotype749	IGK	IGKC	Lc	IGKV15-103	None	IGKJ2	CQQGQSYLMYTF	wt	7	1.49573	123	26.2821
871	clonotype750	IGL	IGLC1	Lc	IGLV1	None	IGLJ1	CALWYSNLRVF	wt	16	3.4188	14	2.99145
872	clonotype772	IGK	IGKC	Lc	IGKV4-70	None	IGKJ1	CHQRSSYWTF	wt	6	1.28205	136	29.0598
873	clonotype780	IGK	IGKC	Lc	IGKV4-58	None	IGKJ4	CQQWSGYPFITF	wt	4	0.854701	80	17.094
874	clonotype789	IGK	IGKC	Lc	IGKV3-4	None	IGKJ1	CQQSNEDPPWTF	wt	6	1.28205	136	29.0598
875	clonotype801	IGK	IGKC	Lc	IGKV8-34	None	IGKJ5	CQQSYSAPLTF	wt	2	0.42735	102	21.7949
876	clonotype802	IGK	IGKC	Lc	IGKV19-93	None	IGKJ5	CLQYDNLLPTF	wt	19	4.05983	102	21.7949
877	clonotype832	IGK	IGKC	Lc	IGKV14-130	None	IGKJ5	CLQFYEFPPLTF	wt	4	0.854701	102	21.7949
878	clonotype833	IGK	IGKC	Lc	IGKV14-111	None	IGKJ5	CLQYDELLTF	wt	11	2.35043	102	21.7949
879	clonotype847	IGK	IGKC	Lc	IGKV17-127	None	IGKJ5	CLQSDNMPLLTF	wt	8	1.7094	102	21.7949
880	clonotype848	IGK	IGKC	Lc	IGKV1-135	None	IGKJ2	CWQGTQYTF	wt	14	2.99145	123	26.2821
881	clonotype876	IGK	IGKC	Lc	IGKV4-61	None	IGKJ2	CQQYHSYPYTF	wt	4	0.854701	123	26.2821
882	clonotype886	IGK	IGKC	Lc	IGKV19-93	None	IGKJ1	CLQYDNLLPWTF	wt	19	4.05983	136	29.0598
883	clonotype909	IGL	IGLC3	Lc	IGLV1	None	IGLJ3	CALWYSNQTFIF	wt	16	3.4188	5	1.06838
884	clonotype953	IGK	IGKC	Lc	IGKV10-96	None	IGKJ1	CQQGNTLLWTF	wt	12	2.5641	136	29.0598
885	clonotype958	IGL	IGLC2	Lc	IGLV3	None	IGLJ2	CGVGDTIKEQFYVF	wt	5	1.06838	8	1.7094
886	clonotype967	IGK	IGKC	Lc	IGKV12-38	None	IGKJ4	CKQAYDVPFTF	wt	5	1.06838	80	17.094
887	clonotype974	IGK	IGKC	Lc	IGKV4-57	None	IGKJ4	CQQRSSYPIFTF	wt	8	1.7094	80	17.094
888	clonotype996	IGK	IGKC	Lc	IGKV6-23	None	IGKJ2	CQQYSSYYTF	wt	8	1.7094	123	26.2821
889	clonotype1150	IGK	IGKC	Lc	IGKV6-23	None	IGKJ2	CQQYSSYPMYTF	wt	8	1.7094	123	26.2821
890	clonotype1237	IGK	IGKC	Lc	IGKV4-58	None	IGKJ5	CQQWSGYPLTF	wt	4	0.854701	102	21.7949
891	clonotype1279	IGK	IGKC	Lc	IGKV4-72	None	IGKJ4	CQQWSSSPFTF	wt	3	0.641026	80	17.094
892	clonotype1412	IGK	IGKC	Lc	IGKV4-86	None	IGKJ2	CQQWNYPLYTF	wt	3	0.641026	123	26.2821
893	clonotype1553	IGK	IGKC	Lc	IGKV17-121	None	IGKJ5	CLQSDNLPLLTF	wt	6	1.28205	102	21.7949
894	clonotype1600	IGK	IGKC	Lc	IGKV8-27	None	IGKJ4	CHQYLSSFTF	wt	8	1.7094	80	17.094
895	clonotype1612	IGK	IGKC	Lc	IGKV8-27	None	IGKJ1	CHQYLSWTF	wt	8	1.7094	136	29.0598
896	clonotype1757	IGK	IGKC	Lc	IGKV1-135	None	IGKJ2	CWQGTHLYTF	wt	14	2.99145	123	26.2821
897	clonotype1861	IGL	IGLC1	Lc	IGLV1	None	IGLJ1	CALWYSNHFGVF	wt	16	3.4188	14	2.99145
898	clonotype1902	IGK	IGKC	Lc	IGKV8-27	None	IGKJ2	CHQYLSLYTF	wt	8	1.7094	123	26.2821
899	clonotype2059	IGK	IGKC	Lc	IGKV8-16	None	IGKJ1	CQQHLHIRTF	wt	6	1.28205	136	29.0598
900	clonotype2109	IGK	IGKC	Lc	IGKV12-89	None	IGKJ5	CQNVLSTPPF	wt	4	0.854701	102	21.7949
901	clonotype2212	IGK	IGKC	Lc	IGKV8-16	None	IGKJ1	CQQHLHIPRTF	wt	6	1.28205	136	29.0598
902	clonotype2339	IGK	IGKC	Lc	IGKV1-99	None	IGKJ2	CFQSNYLPYTF	wt	6	1.28205	123	26.2821
903	clonotype2428	IGK	IGKC	Lc	IGKV1-117	None	IGKJ5	CFQGSHALTF	wt	9	1.92308	102	21.7949
904	clonotype2471	IGK	IGKC	Lc	IGKV8-16	None	IGKJ4	CQQHLHIPFTF	wt	6	1.28205	80	17.094
905	clonotype2517	IGK	IGKC	Lc	IGKV3-2	None	IGKJ5	CQQSKEVPPLTF	wt	7	1.49573	102	21.7949
906	clonotype2837	IGK	IGKC	Lc	IGKV9-129	None	IGKJ1	CLQYASSPRTF	wt	1	0.213675	136	29.0598
907	clonotype2884	IGK	IGKC	Lc	IGKV8-16	None	IGKJ1	CQQHLHIPWTF	wt	6	1.28205	136	29.0598
908	clonotype379	IGK	IGKC	Lc	IGKV4-57	None	IGKJ1	CQQRSSYPWTF	wt	8	1.7094	136	29.0598
909	clonotype480	IGL	IGLC3	Lc	IGLV1	None	IGLJ3	CALWYSNHFFIF	wt	16	3.4188	5	1.06838
910	clonotype551	IGK	IGKC	Lc	IGKV14-100	None	IGKJ5	CVQYAQFPLTF	wt	5	1.06838	102	21.7949
911	clonotype795	IGK	IGKC	Lc	IGKV6-15	None	IGKJ4	CQQYNSYPTF	wt	11	2.35043	80	17.094
912	clonotype858	IGK	IGKC	Lc	IGKV10-95	None	IGKJ5	CQQYSKLLTF	wt	3	0.641026	102	21.7949
913	clonotype984	IGL	IGLC1	Lc	IGLV2	None	IGLJ1	CALWYSTHFEVF	wt	6	1.28205	14	2.99145
914	clonotype997	IGK	IGKC	Lc	IGKV10-95	None	IGKJ4	CQQYSKLPFTF	wt	3	0.641026	80	17.094

## Sheet: CDR3 clone frequency
	status	v_subgroup	cdr3_aa	clonotype_count	freq
33	wt	IGHV3-6	ARASNLYYYGSSVYYFDY	69	0.246675		All codes and analysis parameters would be provided upon rasonable request
74	wt	IGHV1-78	ARGDGYYVFAY	6	0.02145
76	wt	IGHV6-6	THDGYWYFDV	4	0.0143
78	wt	IGHV1-9	ARGGEYSNFYAMDY	2	0.00715001
99	wt	IGHV10-1	VSPEVAPYAMDY	13	0.046475
107	wt	IGHV8-8	ARIGYYEGKYFDV	11	0.039325
118	wt	IGHV6-3	TEGSYDYERSSDY	31	0.110825
139	wt	IGHV2-2	AKIYYGNYGYAMDY	2	0.00715001
164	wt	IGHV6-6	TRRYYGSSFAY	19	0.0679251
165	wt	IGHV6-3	TGLYYGNYYFDY	44	0.1573
184	wt	IGHV1-81	ARGTYGSSHYYYAMDY	5	0.017875
208	wt	IGHV5-16	AREPLITTVVATFYDWYFDV	21	0.0750751
214	wt	IGHV9-3	ARFYYYGSNPDYYAMDY	4	0.0143
220	wt	IGHV6-3	TGYYYGSSPDY	9	0.032175
222	wt	IGHV3-6	AREGITTVVAPCAMDY	48	0.1716
241	wt	IGHV5-9	ARHGYEVYFDV	2	0.00715001
248	wt	IGHV6-3	TDYYRGAMDY	76	0.2717
251	wt	IGHV3-6	ARDYYSNYVYAMDY	37	0.132275
255	wt	IGHV3-6	ARDYDYDVGFA	3	0.010725
265	wt	IGHV6-3	TEGGSYAMDY	29	0.103675
271	wt	IGHV9-4	ARVGLLSTYYAMDY	16	0.0572001
279	wt	IGHV8-4	AQSVWLGFAY	16	0.0572001
285	wt	IGHV8-8	ARIRYYYGSSGWYFDV	10	0.03575
287	wt	IGHV3-6	ARDRLAWFAY	76	0.2717
289	wt	IGHV1-50	ASNTFAY	117	0.418275
290	wt	IGHV3-6	ARADYDGRNYYAMDY	110	0.39325
292	wt	IGHV1-75	ANSNYGGY	7	0.025025
293	wt	IGHV4-1	ARDYYGSSYRYFDV	4	0.0143
299	wt	IGHV2-3	AKRGYYYGSSLYYYAM	2	0.00715001
304	wt	IGHV6-3	TGDIYYYGSSYWYFDV	27	0.0965251
314	wt	IGHV3-6	ARGETTVVPY	30	0.10725
319	wt	IGHV1-19	ARTHYYGRSYW	2	0.00715001
320	wt	IGHV8-8	ARIADSSFAY	10	0.03575
322	wt	IGHV6-3	TLLWGLYFDY	15	0.0536251
325	wt	IGHV8-5	AQMKGHYDYEY	78	0.27885
333	wt	IGHV1-19	ARGGSKNYYFDY	11	0.039325
334	wt	IGHV1-75	ARRQYYFDY	3	0.010725
345	wt	IGHV6-3	TGKSSYFDY	44	0.1573
359	wt	IGHV15-2	ARRYYGSSYWYFDV	18	0.0643501
360	wt	IGHV3-6	ARVGGFAY	73	0.260975
362	wt	IGHV9-4	ARVDLPRDYAMDY	21	0.0750751
368	wt	IGHV1-78	ASYYDFDY	23	0.0822251
370	wt	IGHV1-54	ALFITTVMGHLDY	3	0.010725
372	wt	IGHV3-6	ARWGLRRTDYYAMDY	54	0.19305
378	wt	IGHV1-26	ARNPIYYDFDY	73	0.260975
389	wt	IGHV3-6	ARAPYYYGSLYAMDY	22	0.0786501
393	wt	IGHV10-3	VRDHYDGYPDY	13	0.046475
398	wt	IGHV1-26	ARERWLLRRHYYAMD	2	0.00715001
399	wt	IGHV7-1	ARDPAYYSNYDYAMDY	10	0.03575
402	wt	IGHV3-6	ARDRGKGFDV	39	0.139425
406	wt	IGHV8-8	ARIHDGYSHYFDY	13	0.046475
408	wt	IGHV1-42	ARRGGSSTYFDY	6	0.02145
411	wt	IGHV1-19	AREERKLGLGDY	10	0.03575
413	wt	IGHV3-4	ARGVDSSGPEGYYAMDY	8	0.0286
415	wt	IGHV3-6	AIGITTVYYFDY	74	0.26455
420	wt	IGHV3-6	ACSFAY	37	0.132275
425	wt	IGHV6-3	TITTVVAPDWYFDV	34	0.12155
434	wt	IGHV1-18	ASYDYGSSPFAY	4	0.0143
439	wt	IGHV1-58	ARSGSSYGNAMDY	3	0.010725
442	wt	IGHV6-3	TFYGSSPYYFDY	64	0.2288
447	wt	IGHV7-3	ARWGGNLFD	2	0.00715001
449	wt	IGHV3-5	ARDQYAYYSNYGFDY	11	0.039325
450	wt	IGHV3-6	ASRELIDLLFAY	64	0.2288
454	wt	IGHV7-1	ARDASYYSNPWFAY	13	0.046475
459	wt	IGHV3-6	AREGGIYYGYDDYAMDY	51	0.182325
460	wt	IGHV3-6	ARDRRLLSWFAY	64	0.2288
461	wt	IGHV3-1	ARDGDYDWFAY	14	0.0500501
463	wt	IGHV2-9-1	ARKDGYYDAMDY	11	0.039325
464	wt	IGHV3-6	ARDRGLLRYWYFDV	40	0.143
467	wt	IGHV9-3	ARWGTVVPEDFDV	6	0.02145
470	wt	IGHV1-81	ANYYGSSYFDY	2	0.00715001
472	wt	IGHV3-5	ARDDGSSYWYF	2	0.00715001
475	wt	IGHV13-2	TRGSSYPLYFDY	8	0.0286
482	wt	IGHV6-3	TGGAYGNYSWFAY	61	0.218075
484	wt	IGHV3-8	ASGEDFAY	12	0.0429
488	wt	IGHV3-6	ARRVVATPYWYFDV	93	0.332475
489	wt	IGHV3-6	AKDGSYAMDY	14	0.0500501
490	wt	IGHV3-6	ARWEGYGYDPYYAMDY	9	0.032175
492	wt	IGHV6-6	TRPSYDYDVPWF	2	0.00715001
493	wt	IGHV3-6	ARDRRLLSWFA	6	0.02145
499	wt	IGHV3-6	AREGLLRMDY	57	0.203775
500	wt	IGHV3-6	AERPAQATGFAY	81	0.289575
502	wt	IGHV10-3	VRLDSNDLEGFAY	11	0.039325
503	wt	IGHV4-1	ARRNDYNYAMDY	16	0.0572001
507	wt	IGHV1-50	ARIYYDYD	101	0.361075
511	wt	IGHV2-9-1	ARRGVYYGSSYEGAMDY	3	0.010725
513	wt	IGHV6-3	TGYDARAMDY	53	0.189475
515	wt	IGHV3-6	ARGYYGSIPYFDY	53	0.189475
521	wt	IGHV3-6	AREGGNYYGSSYGFDY	49	0.175175
522	wt	IGHV7-3	ARWGGNLFDY	10	0.03575
523	wt	IGHV6-3	TVYHPYAMDY	89	0.318175
526	wt	IGHV6-3	TGGTTVDIWFAY	64	0.2288
528	wt	IGHV6-3	TTGSSTMDY	53	0.189475
536	wt	IGHV1-78	ARDYDYDPFAY	31	0.110825
540	wt	IGHV14-3	ARTHGSSRGFAY	8	0.0286
544	wt	IGHV8-6	ARRARVGDAMDY	32	0.1144
552	wt	IGHV3-6	AREGAM	6	0.02145
553	wt	IGHV5-4	ARGYYGSSPFAY	3	0.010725
556	wt	IGHV3-6	ARETTVVPYFDY	88	0.3146
559	wt	IGHV3-6	AREGYYYGSSSPDY	64	0.2288
561	wt	IGHV15-2	ARLYDYDRGGFDY	21	0.0750751
563	wt	IGHV1-58	ARSKPDAMDY	8	0.0286
568	wt	IGHV10-3	VRERIYYGNSYAMDY	13	0.046475
572	wt	IGHV1-78	AKAYYSNYGFAY	71	0.253825
573	wt	IGHV1-26	ARSANYYGSSYGYFDV	8	0.0286
574	wt	IGHV1-36	ARDGYPSWFAY	3	0.010725
577	wt	IGHV6-3	TVGWLLLYYAMDY	24	0.0858001
578	wt	IGHV6-3	TFHTVGHYYAMDY	20	0.0715001
579	wt	IGHV6-3	TQWRLLRGFAY	28	0.1001
581	wt	IGHV1-37	ARYHYYAMDY	46	0.16445
583	wt	IGHV4-1	ARLPTGTRDYAMDY	18	0.0643501
586	wt	IGHV1-58	ARYYGNPLAMDY	8	0.0286
587	wt	IGHV8-8	ARIGPSITTVVATKAMDY	15	0.0536251
597	wt	IGHV3-6	ARAPLYYYGTGYYAMDY	63	0.225225
602	wt	IGHV3-6	ARDQEGLLAWFAY	46	0.16445
604	wt	IGHV10-1	VRPDYDYDDGYAMDY	8	0.0286
605	wt	IGHV6-3	TVLITTARGDY	3	0.010725
606	wt	IGHV8-8	ARAYSIFNAMDY	36	0.1287
607	wt	IGHV8-8	ARIVYDYFYAMDY	11	0.039325
611	wt	IGHV3-6	ARDRGYDGQTGGDAMDY	93	0.332475
612	wt	IGHV1-75	AREGLRRGLYAMDY	2	0.00715001
614	wt	IGHV3-1	AREGRDYYGSSYGYFDV	11	0.039325
618	wt	IGHV1-26	ARGDYYAMDY	11	0.039325
619	wt	IGHV3-6	ARGGVTTKVSYYYAMDY	58	0.20735
621	wt	IGHV3-6	ARDPDYYGSSYWYFDV	29	0.103675
630	wt	IGHV1-74	AIRVRPYYYAMDY	2	0.00715001
636	wt	IGHV1-50	ASNTFA	8	0.0286
637	wt	IGHV4-1	ARTYYSKGGYYYAMDY	9	0.032175
638	wt	IGHV1-85	ARWAYYYGSSRYYYAMDY	3	0.010725
642	wt	IGHV6-3	TLYDSMDY	92	0.3289
644	wt	IGHV1-76	ARSRLSFAY	3	0.010725
655	wt	IGHV6-3	SLRAMDY	68	0.2431
656	wt	IGHV1-31	ARSYGYDSCAMDY	13	0.046475
659	wt	IGHV6-3	TGSNYAMDY	42	0.15015
663	wt	IGHV1-18	ARRIYYDYPWFAY	4	0.0143
666	wt	IGHV2-3	AKPESLDYYYGSSPHYYAMDY	6	0.02145
680	wt	IGHV1-54	ARGGYSPYYYAMDY	3	0.010725
681	wt	IGHV3-6	ARADYDGRNYYAM	4	0.0143
685	wt	IGHV1-9	ARWDTTVVAGDY	2	0.00715001
690	wt	IGHV6-3	IPVYYYGSSYDYYAMDY	51	0.182325
694	wt	IGHV1-82	ATYYSNYADY	3	0.010725
697	wt	IGHV3-6	ARDRGRLPFDY	90	0.32175
701	wt	IGHV3-6	ATYYYGSSPAWFAY	55	0.196625
703	wt	IGHV6-3	TGGGLYDASWFAY	45	0.160875
706	wt	IGHV3-6	ARDPNYDYDVRFAY	110	0.39325
707	wt	IGHV1-18	ARGRNYDYPNYYAMDY	5	0.017875
709	wt	IGHV1-26	ARFDSSGHFDY	4	0.0143
711	wt	IGHV1-22	ARDVDYAMDY	9	0.032175
717	wt	IGHV1-75	ASDDGYYGWGFY	5	0.017875
718	wt	IGHV5-16	ARVGAIYDGYYDYAMDY	12	0.0429
724	wt	IGHV3-6	ARGYGRVPYWYFDV	30	0.10725
725	wt	IGHV5-16	AREGDYDGYYYAMDY	25	0.0893751
727	wt	IGHV8-8	ARIAGYYGSSYFFDY	20	0.0715001
731	wt	IGHV8-8	ARIVYSNYPWFAY	22	0.0786501
732	wt	IGHV3-6	AREADGYPFDY	40	0.143
734	wt	IGHV3-6	ARRCGNYALFDY	42	0.15015
737	wt	IGHV5-16	ARAGSYYFDY	7	0.025025
741	wt	IGHV1-64	ARETDYVNYYYAMDY	8	0.0286
743	wt	IGHV5-9-1	TRVYYDYDEDYYAMDY	99	0.353925
745	wt	IGHV8-8	AVDGYYGIGAMDY	48	0.1716
756	wt	IGHV3-6	ARGEKNGHYGFAY	3	0.010725
759	wt	IGHV3-6	ARVDGNYYAMDY	37	0.132275
760	wt	IGHV1-26	AIYYDYFYAMDY	18	0.0643501
762	wt	IGHV3-6	ARDDGPYYYAMDY	59	0.210925
763	wt	IGHV6-3	TDGYYGGGAMDY	52	0.1859
764	wt	IGHV6-3	TIYYGRGWYFDV	43	0.153725
766	wt	IGHV3-6	AAGDFDY	44	0.1573
769	wt	IGHV1-4	ARFRTGFDY	57	0.203775
770	wt	IGHV6-3	LGDYDRGQYGMDY	29	0.103675
772	wt	IGHV13-2	SRDCAY	10	0.03575
775	wt	IGHV1-78	ARESIYYYGSSYF	3	0.010725
777	wt	IGHV3-6	ARSTMVTPFAY	48	0.1716
778	wt	IGHV6-3	TGYYGYAMDY	58	0.20735
783	wt	IGHV1-9	ARWPLLWYLDY	4	0.0143
786	wt	IGHV9-4	ARRDDYDFDY	8	0.0286
788	wt	IGHV1-78	ARNIPGYAMDY	46	0.16445
790	wt	IGHV3-6	ASDYYGRYFDV	53	0.189475
794	wt	IGHV1-26	ARWWFYWYFDV	9	0.032175
797	wt	IGHV3-6	ARDPIYYYGSSYWYFDV	73	0.260975
798	wt	IGHV1-26	ARRAKDYDWFAY	3	0.010725
804	wt	IGHV1-20	ARSRSDYDYDGPAY	22	0.0786501
808	wt	IGHV3-6	AREMAADYYGSSYEDYFDY	36	0.1287
810	wt	IGHV3-6	ARITTVLDY	18	0.0643501
813	wt	IGHV1-26	ARRRIYYGNYGY	9	0.032175
815	wt	IGHV6-3	TGGDLYWYFDV	30	0.10725
819	wt	IGHV9-3	ARGDYYGSKSPYWYFDV	6	0.02145
821	wt	IGHV6-3	TGPLFYGSSDYAMDY	2	0.00715001
823	wt	IGHV8-12	ARVYGNYYFDY	9	0.032175
825	wt	IGHV4-1	ARQRTAQAPMDY	13	0.046475
826	wt	IGHV7-3	ARYTVVATDYAMDY	4	0.0143
827	wt	IGHV6-3	TGSYDYLAY	64	0.2288
829	wt	IGHV3-6	ARGNSNPPMGY	53	0.189475
838	wt	IGHV3-6	ARGRWLLPYWYFDV	45	0.160875
839	wt	IGHV6-3	TYYYGSSYDYFDY	121	0.432575
840	wt	IGHV3-6	ARGGYGNLMDY	38	0.13585
843	wt	IGHV3-6	ARANWDWYFD	5	0.017875
847	wt	IGHV3-6	ARGYYGSSYERYFDV	49	0.175175
852	wt	IGHV3-6	AREDYYGEDY	109	0.389675
853	wt	IGHV3-6	ARELRYPWYFDV	76	0.2717
854	wt	IGHV1-19	ARNYYGSPWFAY	18	0.0643501
855	wt	IGHV14-3	ARGITTVVATRYFDV	9	0.032175
856	wt	IGHV8-8	ARIEDDGPYFDY	8	0.0286
858	wt	IGHV6-3	TAPLITTVVERYFDV	31	0.110825
862	wt	IGHV3-6	ARRGDY	46	0.16445
864	wt	IGHV8-8	ARIRGYHDYDAMDY	18	0.0643501
869	wt	IGHV9-2	ARVYDGYYVAWFAY	2	0.00715001
877	wt	IGHV8-11	ARIEGFTTVVADAMDY	32	0.1144
883	wt	IGHV1-26	AFITTVVIPFDY	12	0.0429
892	wt	IGHV1-75	ARGRLRREAYYFDY	4	0.0143
893	wt	IGHV3-8	ARSGLRDAMDY	8	0.0286
895	wt	IGHV3-6	ANWFAY	58	0.20735
901	wt	IGHV6-3	TGSTMITKFAY	48	0.1716
916	wt	IGHV8-5	AQIGLHWYFDV	24	0.0858001
919	wt	IGHV1-64	ARRGLTGTGDY	3	0.010725
922	wt	IGHV1-75	ARDWDSYFDV	7	0.025025
929	wt	IGHV10-1	VRPDYSTWFAY	8	0.0286
930	wt	IGHV1-20	ARSPIITTVVATSPYWYFDV	7	0.025025
933	wt	IGHV3-6	ARGAYYGNYEAWFAY	48	0.1716
934	wt	IGHV1-78	ARYYYDYDAYAMDY	84	0.3003
937	wt	IGHV4-1	ARQDGYSNAMDY	7	0.025025
938	wt	IGHV4-1	ARRSLSNYTYYYAMDY	7	0.025025
939	wt	IGHV1-75	ARSSPRQLRPYYAMDY	4	0.0143
940	wt	IGHV6-3	IPVYYYGSSYDYYA	3	0.010725
941	wt	IGHV1-75	ARQDYYGSSYNYFDY	10	0.03575
944	wt	IGHV8-8	ARIGDGYY	9	0.032175
947	wt	IGHV9-3	ASSPQLRLPLTWFAY	6	0.02145
948	wt	IGHV3-8	ARILLRSYYFDY	13	0.046475
950	wt	IGHV8-12	ARRAIYYYGSSYENAMDY	19	0.0679251
952	wt	IGHV6-3	TAIYYDYDEGY	57	0.203775
955	wt	IGHV8-8	ARIERGRGAMDY	17	0.0607751
956	wt	IGHV3-6	ARDYDYDVGFAY	50	0.17875
957	wt	IGHV9-3	ARGRLDGYDVGYFDY	2	0.00715001
961	wt	IGHV6-3	TEDGYYVAY	31	0.110825
964	wt	IGHV6-3	TEDSSGSERYFD	3	0.010725
967	wt	IGHV6-3	TGGLRRGDYFDY	11	0.039325
968	wt	IGHV3-6	ARDGHYYGSSYVDWYFDV	52	0.1859
971	wt	IGHV3-6	ARGGEGMDY	57	0.203775
972	wt	IGHV3-6	ARGDSTMVRGFAY	15	0.0536251
974	wt	IGHV1-22	ALLTG	4	0.0143
976	wt	IGHV1-58	ARTLPYGLDY	14	0.0500501
981	wt	IGHV1-50	ACNTFAY	96	0.3432
982	wt	IGHV2-9-1	ARIGTTVRYFDV	3	0.010725
983	wt	IGHV2-2	ARGGHGYSRFMDY	8	0.0286
986	wt	IGHV3-6	ARDQISLILGYGSTYGFAY	38	0.13585
987	wt	IGHV8-8	ARIGRLRRGYYFDY	6	0.02145
988	wt	IGHV1-26	ARGRITTVVATDY	7	0.025025
990	wt	IGHV6-3	TGDYDYFYYFDY	52	0.1859
992	wt	IGHV6-3	TAGLFYGSSYDFDY	8	0.0286
999	wt	IGHV9-3	AVTTVVAPLDYAMDY	4	0.0143
1003	wt	IGHV1-26	ARYSYYYGSSCYAMDY	5	0.017875
1004	wt	IGHV1-9	ARGGIYYGSSYGFYYAMDY	3	0.010725
1005	wt	IGHV5-16	ARDLSGDYPLDAMDY	15	0.0536251
1006	wt	IGHV6-3	TEDSSGSERYFDV	2	0.00715001
1007	wt	IGHV3-6	ARLRLRLAMDY	10	0.03575
1011	wt	IGHV3-6	ARDYGSSYSWYFDV	40	0.143
1017	wt	IGHV5-16	ARADYGSSYAMDY	24	0.0858001
1021	wt	IGHV9-3	ARTVVVHFDY	3	0.010725
1022	wt	IGHV10-3	VRDSPGYFDV	16	0.0572001
1024	wt	IGHV8-8	ARIDDGYYFFAY	13	0.046475
1025	wt	IGHV3-6	AREGFGNYKYFDY	63	0.225225
1026	wt	IGHV3-6	ARDPRSYRGFAY	74	0.26455
1028	wt	IGHV7-3	ARWGGLGYFDY	11	0.039325
1029	wt	IGHV3-3	ARAQNWDCAMDY	38	0.13585
1032	wt	IGHV3-6	ARGQPHYYAMDY	35	0.125125
1035	wt	IGHV3-6	ARGGLLSYYFDY	22	0.0786501
1037	wt	IGHV1-26	ARRLNWALYYAMDY	7	0.025025
1038	wt	IGHV6-6	TGAGYAMDY	25	0.0893751
1045	wt	IGHV3-6	ARDWGGS	49	0.175175
1046	wt	IGHV8-11	ARILSSPCYFDV	14	0.0500501
1049	wt	IGHV1-19	ARSGYGNYAWFAY	3	0.010725
1053	wt	IGHV8-12	ARRTLVWYFDV	9	0.032175
1055	wt	IGHV3-6	ARADYDGRNYYA	3	0.010725
1056	wt	IGHV1-26	ARLTTVVATDY	3	0.010725
1059	wt	IGHV1-15	TRWLLGYFDV	3	0.010725
1064	wt	IGHV2-2	ARAISDGDYAMDY	2	0.00715001
1066	wt	IGHV6-3	TVLAVV	8	0.0286
1068	wt	IGHV5-2	ARPPYYDYDLYYFDY	5	0.017875
1069	wt	IGHV10-1	VRHVGGYDGEFGY	4	0.0143
1071	wt	IGHV3-6	ARGYYGETFDY	74	0.26455
1074	wt	IGHV1-58	ARQDLYYAMDY	23	0.0822251
1076	wt	IGHV3-8	ARLGYAMDY	3	0.010725
1078	wt	IGHV3-6	ARERAITSYYF	5	0.017875
1085	wt	IGHV1-7	ARERWLYY	5	0.017875
1087	wt	IGHV1-20	ARSGGYDFAY	26	0.0929501
1089	wt	IGHV3-6	AREGLYGNYEGSAMDY	14	0.0500501
1091	wt	IGHV6-5	TGFITTVDYAMDY	44	0.1573
1093	wt	IGHV7-1	ASLHYSNYEGMDY	15	0.0536251
1094	wt	IGHV1-75	ARAYYDYDVKLWYAMDY	4	0.0143
1098	wt	IGHV3-6	ARFTTVVAGDY	43	0.153725
1106	wt	IGHV7-1	ARDPYSNYGNAMDY	28	0.1001
1108	wt	IGHV3-8	ARWGYDYDEGYFDV	7	0.025025
1110	wt	IGHV1-26	ARRDYDWFA	2	0.00715001
1111	wt	IGHV1-52	ARGYDYDWFAY	3	0.010725
1113	wt	IGHV8-8	ARIEITTVNYYAMDY	12	0.0429
1115	wt	IGHV1-59	ARDYYGSSYHWYFDV	3	0.010725
1127	wt	IGHV3-1	ARGALFDY	16	0.0572001
1128	wt	IGHV3-6	ARGYLDWYFDV	30	0.10725
1129	wt	IGHV8-2	WRERDYGSRGFAY	8	0.0286
1130	wt	IGHV8-6	ARSVYYYGSIPYYFDY	49	0.175175
1131	wt	IGHV3-6	ARAYSNYVSYWYFDV	24	0.0858001
1137	wt	IGHV3-6	ARDDGPYYYAM	4	0.0143
1139	wt	IGHV1-67	ARWDYYGSSYVDY	8	0.0286
1140	wt	IGHV3-6	ARGLRRGFAY	53	0.189475
1142	wt	IGHV3-6	ATGYGYYYAMDY	4	0.0143
1143	wt	IGHV15-2	ARGGEDDYDKRRYYFDY	4	0.0143
1146	wt	IGHV3-6	ARDRDYDDPYWYFDV	31	0.110825
1155	wt	IGHV6-3	TGLWYYGNWF	3	0.010725
1156	wt	IGHV3-6	ARETVYYDYFYYAMDY	71	0.253825
1159	wt	IGHV3-3	ARGLISLGYF	3	0.010725
1163	wt	IGHV3-6	ARESGSSPIYAMDY	18	0.0643501
1173	wt	IGHV10-1	VRPGTTGAMDY	19	0.0679251
1177	wt	IGHV3-6	ARGGKNGHYGFAY	74	0.26455
1178	wt	IGHV1-26	AMDYGFAY	5	0.017875
1181	wt	IGHV6-3	TNYFDY	117	0.418275
1183	wt	IGHV10-3	VRDYYGLDY	6	0.02145
1184	wt	IGHV10-3	VRDDYGSRYFDV	19	0.0679251
1188	wt	IGHV9-2	ASTGTNYFDY	4	0.0143
1192	wt	IGHV3-8	ARRKGYDYDGPMDY	8	0.0286
1193	wt	IGHV9-3	AVGSSYYFDY	11	0.039325
1194	wt	IGHV1-62-2	ARHEEGSSSFAY	12	0.0429
1195	wt	IGHV3-6	GSGNYDYDVGFAY	46	0.16445
1197	wt	IGHV1-18	ARGGIYYDSYYAMDY	8	0.0286
1202	wt	IGHV6-6	TRDYLYYYAMDY	9	0.032175
1204	wt	IGHV1-19	ARGGNYYGSSSFAY	8	0.0286
1211	wt	IGHV3-4	ARGLFYYYGSSPYYAMDY	40	0.143
1215	wt	IGHV3-6	MYYGYDAIPWFAY	68	0.2431
1216	wt	IGHV9-2	ARSEDGYYDAMDY	3	0.010725
1217	wt	IGHV7-4	VKALYGNYAMDY	19	0.0679251
1218	wt	IGHV1-85	AREEVIPYAMDY	8	0.0286
1219	wt	IGHV4-1	ARERGFAY	8	0.0286
1221	wt	IGHV10-1	VRRGAMDY	28	0.1001
1222	wt	IGHV6-3	TEITTVEGYFDV	15	0.0536251
1227	wt	IGHV8-8	ARIDYGSSPSWFAY	2	0.00715001
1228	wt	IGHV1-64	AGEDDSNYYAMDY	12	0.0429
1231	wt	IGHV3-6	ARDRTVVATDY	81	0.289575
1232	wt	IGHV8-5	AQIYYYGSIFAY	144	0.514801
1236	wt	IGHV1-39	ARSARLRLDYAMDY	6	0.02145
1237	wt	IGHV7-3	ARYGYDEGYAM	2	0.00715001
1240	wt	IGHV6-3	TGGTTVVRGYWYFDV	33	0.117975
1241	wt	IGHV9-1	ARDYPFAY	3	0.010725
1243	wt	IGHV1-26	ARSPTTVVASANWERYYYAMDY	12	0.0429
1244	wt	IGHV1-75	ARSDYYYGSSYDYYAMDY	15	0.0536251
1245	wt	IGHV1-26	ARGGYYDYFYYAMDY	5	0.017875
1248	wt	IGHV3-6	ASSYDY	60	0.2145
1252	wt	IGHV6-3	TGEGALGYDEFAY	29	0.103675
1259	wt	IGHV1-78	ARSEATDY	19	0.0679251
1264	wt	IGHV3-1	ARDEGSGRRYFDV	8	0.0286
1269	wt	IGHV10-1	VRHRDY	8	0.0286
1285	wt	IGHV6-6	TRDYYGSLFS	8	0.0286
1289	wt	IGHV6-3	TGPITSGYYAMDY	35	0.125125
1290	wt	IGHV1-26	ALITTVGAY	8	0.0286
1295	wt	IGHV9-3	ARGAYYGSSYGYFDV	5	0.017875
1298	wt	IGHV1-42	ARRVSYAMDY	10	0.03575
1299	wt	IGHV6-3	TEIPYYYGSSHWYFDV	29	0.103675
1303	wt	IGHV6-6	TPGGFDY	13	0.046475
1305	wt	IGHV15-2	ARRAIYYDYDEERWYFDV	2	0.00715001
1308	wt	IGHV6-3	TYYYGSSYDYFD	10	0.03575
1309	wt	IGHV13-2	SRERQLRLYAMDY	8	0.0286
1313	wt	IGHV8-8	ARVYYGNFYFDY	13	0.046475
1323	wt	IGHV1-78	ARWDYDMDYAMDY	24	0.0858001
1329	wt	IGHV9-3	KRLPVCL	2	0.00715001
1332	wt	IGHV1-78	ARWDYDMD	4	0.0143
1334	wt	IGHV3-6	ARGEFLRVHY	29	0.103675
1336	wt	IGHV1-5	TRGGITTVD	8	0.0286
1337	wt	IGHV1-26	ARYYYDYSWFAY	4	0.0143
1343	wt	IGHV8-6	ARSVYYYGSIPYYFD	3	0.010725
1345	wt	IGHV6-3	TAGYAWF	2	0.00715001
1346	wt	IGHV3-1	ARDNGLLYYGSIYWYFDV	27	0.0965251
1356	wt	IGHV10-3	VREYYGSSYEFAY	18	0.0643501
1359	wt	IGHV9-1	ARRGEYYAMDY	9	0.032175
1362	wt	IGHV1-42	ARCSLMEGGDY	5	0.017875
1369	wt	IGHV10-1	VSGFITTVVATDYYAMDY	15	0.0536251
1372	wt	IGHV6-3	TGGSNYWYFD	6	0.02145
1373	wt	IGHV1-78	ALYYGNPWYAMDY	10	0.03575
1376	wt	IGHV5-16	ARLPPYYSIWYFDV	17	0.0607751
1381	wt	IGHV6-3	TLDWG	41	0.146575
1382	wt	IGHV6-3	GRGFAY	5	0.017875
1383	wt	IGHV9-4	ARYPHYYGSSYAPYYYAMDY	10	0.03575
1384	wt	IGHV8-8	AVDGYY	3	0.010725
1388	wt	IGHV3-6	ASAVVAPRFAY	5	0.017875
1389	wt	IGHV3-6	ARAVYDYDAWFAY	45	0.160875
1394	wt	IGHV1-54	AGDYYYGSRANYYAMDY	19	0.0679251
1397	wt	IGHV8-8	ARSGTLDY	10	0.03575
1399	wt	IGHV9-3	ARETY	16	0.0572001
1400	wt	IGHV10-1	VRQRNYDYDAGFAY	9	0.032175
1401	wt	IGHV7-1	ARDVPYYYGSAPFAY	7	0.025025
1402	wt	IGHV6-3	TGGSNYWYFDV	56	0.2002
1405	wt	IGHV6-3	TAGYAWFAY	32	0.1144
1406	wt	IGHV1-26	ARWSHYYGSSPPYYAMDY	9	0.032175
1407	wt	IGHV3-6	ARERGPGGKEEGFAY	30	0.10725
1409	wt	IGHV1-78	AGGIYDGYYAYYFDY	17	0.0607751
1410	wt	IGHV1-26	ARGPIYYYGSPYYFDY	6	0.02145
1414	wt	IGHV8-12	ARSWGRFQAWFAY	5	0.017875
1415	wt	IGHV8-8	ARIETTVGWYFDV	15	0.0536251
1416	wt	IGHV3-6	AREGGLPLDYFDY	59	0.210925
1425	wt	IGHV6-3	TGNCYYAMDY	84	0.3003
1426	wt	IGHV6-3	TGLRPSYWYFDV	40	0.143
1428	wt	IGHV8-2	WREKGSNYDCYAMDY	20	0.0715001
1430	wt	IGHV3-6	ARTYDYDVWFAY	27	0.0965251
1431	wt	IGHV1-18	ARSVPHYYGSSLYWYFDV	2	0.00715001
1432	wt	IGHV8-8	ARIGIYYDYDGGNYYAMDY	7	0.025025
1434	wt	IGHV8-12	ARSPHYYGSQRYYFDY	2	0.00715001
1436	wt	IGHV1-74	AIYYGSSYNWYFDV	3	0.010725
1437	wt	IGHV1-63	ARISFITHYYAMDY	8	0.0286
1441	wt	IGHV6-6	YSRYAMDY	21	0.0750751
1445	wt	IGHV1-37	ARDYGSSYDYAMDY	20	0.0715001
1448	wt	IGHV1-74	AIGWGTTRAWFAY	2	0.00715001
1450	wt	IGHV1-12	ARDYYGSSLYWYFDV	3	0.010725
1452	wt	IGHV3-8	ARSPYGYDEGGYAMDY	11	0.039325
1456	wt	IGHV3-6	ARADYDGYYVWYFDV	49	0.175175
1457	wt	IGHV10-1	VRHYDGYYVYYAMDY	12	0.0429
1458	wt	IGHV1-22	ARRRTGMMFDY	2	0.00715001
1459	wt	IGHV14-2	ARYDGCFDY	5	0.017875
1460	wt	IGHV1-72	AREGLGYFDY	7	0.025025
1461	wt	IGHV1-9	ARIPLGRDYAMDY	3	0.010725
1465	wt	IGHV4-1	ARRGMGLLPYWYFDV	3	0.010725
1471	wt	IGHV3-6	ARDRIDGYYVGFAY	14	0.0500501
1479	wt	IGHV8-8	ARIESPLYDGYYPYAMDY	24	0.0858001
1481	wt	IGHV3-6	ARGGGKTYYFDY	47	0.168025
1482	wt	IGHV3-6	ARVTTVVAPYWYFDV	66	0.23595
1484	wt	IGHV3-5	ARENGYYDWYFDV	21	0.0750751
1485	wt	IGHV9-4	ARLGITTYFDY	9	0.032175
1487	wt	IGHV6-3	TGPLSYGSSDYAMDY	84	0.3003
1488	wt	IGHV1-9	ARTLHYYGSRDY	6	0.02145
1491	wt	IGHV10-1	VRRGYRGYYAMDY	9	0.032175
1492	wt	IGHV9-4	AVFYAMDY	23	0.0822251
1496	wt	IGHV1-78	AREGHYYGSSYYFDY	7	0.025025
1507	wt	IGHV8-8	ARLITTVVEGLTYFDY	12	0.0429
1508	wt	IGHV3-6	ARERAITSYYFDY	38	0.13585
1518	wt	IGHV15-2	ARRRPYWYFD	3	0.010725
1520	wt	IGHV10-3	VRNSRGYAMDY	14	0.0500501
1524	wt	IGHV6-3	TGRDYYGSFAY	53	0.189475
1528	wt	IGHV3-6	ARVVGNYKGLYYAMDY	36	0.1287
1529	wt	IGHV5-2	ARQTDYYGNYDFDY	10	0.03575
1538	wt	IGHV3-6	ARDPVFDY	26	0.0929501
1539	wt	IGHV13-2	SRAYDGYYVGFAY	16	0.0572001
1540	wt	IGHV3-6	AGGNYYAMDY	98	0.35035
1541	wt	IGHV1-15	THSSEVPFAY	3	0.010725
1543	wt	IGHV6-3	TAYYYGSNFDV	36	0.1287
1546	wt	IGHV1-19	AREDGGLYAMDY	10	0.03575
1547	wt	IGHV1-19	ARRDYGSSGAMDY	4	0.0143
1549	wt	IGHV9-3	ARGILLSVGCFDV	5	0.017875
1551	wt	IGHV9-3	ARLKLSPMDY	4	0.0143
1552	wt	IGHV9-3	ARRTVVVPYAMDY	10	0.03575
1554	wt	IGHV6-3	TDLLCDY	19	0.0679251
1558	wt	IGHV1-39	ASNSYFDY	23	0.0822251
1559	wt	IGHV1-26	ARSSIYYDYLAWFAY	3	0.010725
1562	wt	IGHV1-78	ARRPLRGAMDY	2	0.00715001
1563	wt	IGHV8-8	ARIDYYGSQPLWYFDV	18	0.0643501
1568	wt	IGHV3-6	ARRVVATPY	4	0.0143
1571	wt	IGHV1-50	ARLYYYAMDY	6	0.02145
1572	wt	IGHV13-2	SRSGGRGYYAMDY	9	0.032175
1578	wt	IGHV6-3	TGDYDYDGSWFA	6	0.02145
1580	wt	IGHV8-8	ARIAVHGKGSEIYAMDY	20	0.0715001
1583	wt	IGHV3-6	ARANWDWYF	10	0.03575
1584	wt	IGHV9-3	ARYGDDYGGGWFAY	5	0.017875
1588	wt	IGHV3-6	ARGRWLLPYWYF	6	0.02145
1590	wt	IGHV1-19	ARSSYGSSRGAMDY	3	0.010725
1591	wt	IGHV1-26	ARSRYYGSRYYYAMDY	8	0.0286
1592	wt	IGHV1-26	ASYGLNYAMDY	11	0.039325
1593	wt	IGHV3-6	ARDRFLIYYYGSSPSYWYFDV	25	0.0893751
1594	wt	IGHV8-8	ARIDLWLDYYGSSHWYFDV	10	0.03575
1595	wt	IGHV1-20	ARSEVPYYGSSYGY	20	0.0715001
1597	wt	IGHV8-8	ARRLPYYYAMDY	13	0.046475
1607	wt	IGHV5-4	ARGYGFDY	26	0.0929501
1612	wt	IGHV9-2	ARSSSYAMDY	45	0.160875
1613	wt	IGHV14-4	TKLDYYGSSYAY	3	0.010725
1614	wt	IGHV1-78	ARGPFDY	14	0.0500501
1615	wt	IGHV8-12	AGTGSWFAY	7	0.025025
1616	wt	IGHV1-61	ARNYPRSSYYF	2	0.00715001
1619	wt	IGHV7-4	VKAVGYYDYDGPH	18	0.0643501
1620	wt	IGHV1-12	ARWGPHYYGKEAHYFDY	6	0.02145
1621	wt	IGHV14-3	ARSYYGSSRGFAY	3	0.010725
1622	wt	IGHV1-22	ARGGYDYDEYYYAMDY	4	0.0143
1623	wt	IGHV1-39	ARSFYYYGSSYGDWYFDV	4	0.0143
1627	wt	IGHV10-1	VRQGYSKGFAY	10	0.03575
1628	wt	IGHV13-2	SRSTTVPYYAMDY	8	0.0286
1631	wt	IGHV6-3	TGGAYYYGFAY	34	0.12155
1633	wt	IGHV8-12	ARRAYYSSPYYAMDY	2	0.00715001
1634	wt	IGHV9-3	AKTYDYDY	4	0.0143
1641	wt	IGHV6-3	TENGNYDYAMDY	30	0.10725
1642	wt	IGHV6-3	TEYYKN	46	0.16445
1649	wt	IGHV1-19	ARSGKKIYYDPFFDY	18	0.0643501
1654	wt	IGHV2-6	ATYGNYDWFAY	15	0.0536251
1656	wt	IGHV3-6	AREAYYGSSSPWFAY	48	0.1716
1663	wt	IGHV10-3	VRSTGTYYYAMDY	15	0.0536251
1664	wt	IGHV2-9-1	ARKNYYGSSFFYAMDY	5	0.017875
1665	wt	IGHV3-6	ARDRDYDDPYWYFD	3	0.010725
1672	wt	IGHV8-8	ARISYGKYAMDY	35	0.125125
1674	wt	IGHV1-26	ARRGLLRYEYYFDY	3	0.010725
1679	wt	IGHV7-1	ARDAPYYAMDY	26	0.0929501
1680	wt	IGHV3-6	AGTTGRAMDY	58	0.20735
1684	wt	IGHV4-1	ARPFHDGSWYFDV	12	0.0429
1685	wt	IGHV1-5	TREVYDYYAMDY	3	0.010725
1690	wt	IGHV3-6	AREEPLRRGLYAMDY	47	0.168025
1693	wt	IGHV6-3	TGDGYPDY	114	0.40755
1694	wt	IGHV8-8	ARIRDYYGNYSYYAMDY	10	0.03575
1695	wt	IGHV6-3	TEDYGTWFAY	41	0.146575
1702	wt	IGHV3-6	ARGYDYDGAMD	3	0.010725
1703	wt	IGHV1-78	ARYYYDYDAYAMD	5	0.017875
1709	wt	IGHV3-6	ARRGLLFYAMDY	75	0.268125
1711	wt	IGHV5-16	AREGNYGSSYRYFDV	6	0.02145
1712	wt	IGHV3-6	AREGSNYGGAMDY	77	0.275275
1713	wt	IGHV3-6	ARKDSNYRSWFAY	26	0.0929501
1714	wt	IGHV5-16	ARDYYYGSSYPPYAMDY	5	0.017875
1715	wt	IGHV7-1	ARDAGYYGSSYWYFDV	8	0.0286
1716	wt	IGHV3-6	ASGGYWYFDV	62	0.22165
1717	wt	IGHV6-3	TGDYDYDGSWFAY	33	0.117975
1723	wt	IGHV3-8	AVGYGSLYYYA	2	0.00715001
1724	wt	IGHV6-3	TTGSSTMD	2	0.00715001
1725	wt	IGHV3-6	AREGFGNYKYFD	5	0.017875
1728	wt	IGHV10-1	WGDDGAY	9	0.032175
1729	wt	IGHV6-3	TYYSNFYAMDY	134	0.47905
1732	wt	IGHV1-12	ARGEDIYYGNHYFDY	17	0.0607751
1733	wt	IGHV3-6	ARDQVTTMEFDY	40	0.143
1736	wt	IGHV5-16	ARDRGHYYAMDY	26	0.0929501
1737	wt	IGHV1-78	ARIYYDYAMDY	87	0.311025
1738	wt	IGHV3-3	ARGAYYSNYYAMDY	23	0.0822251
1740	wt	IGHV3-6	ARRSKRHAMDY	47	0.168025
1743	wt	IGHV15-2	ARLLNGGYYAMDY	17	0.0607751
1744	wt	IGHV4-1	ATQEYDYAFAY	9	0.032175
1754	wt	IGHV1-20	ARGIYDGYYEGYAMDY	17	0.0607751
1756	wt	IGHV3-1	ASGDYYGSRNWYFDV	14	0.0500501
1758	wt	IGHV3-6	ARAPITTVVDY	21	0.0750751
1759	wt	IGHV2-2-1	AYYIVRGMDY	2	0.00715001
1761	wt	IGHV1-5	TKLADY	3	0.010725
1767	wt	IGHV3-1	ARDPGRRWYFDV	9	0.032175
1770	wt	IGHV2-9-1	ASLYGSPFAY	2	0.00715001
1771	wt	IGHV3-6	ARAPVVGYYFDY	55	0.196625
1772	wt	IGHV1-78	ARWDYGKRGAMDY	29	0.103675
1773	wt	IGHV1-15	TGSTMVTYYAMDY	11	0.039325
1777	wt	IGHV3-6	ARAPVVGYYF	3	0.010725
1778	wt	IGHV6-3	TAPFITTVVEGS	35	0.125125
1779	wt	IGHV3-6	AREGAMVTTEYFDV	34	0.12155
1780	wt	IGHV12-3	AGAPYYHGGFAY	3	0.010725
1788	wt	IGHV1-26	ASFIYYGNYYAMDY	30	0.10725
1790	wt	IGHV1-50	APRGEGYGYGFAY	3	0.010725
1791	wt	IGHV1-19	ARTHYYGRSYWYFDV	13	0.046475
1792	wt	IGHV10-3	VREGYYYGSSYYYAMDY	16	0.0572001
1794	wt	IGHV6-3	TVYSNYGAMDY	15	0.0536251
1800	wt	IGHV3-6	ARRAAQATFAWFAY	24	0.0858001
1801	wt	IGHV6-3	TGRDDGYYDWFA	3	0.010725
1805	wt	IGHV9-2	ARDTTVVKDWYFDV	5	0.017875
1808	wt	IGHV1-5	TILYYYGSD	5	0.017875
1810	wt	IGHV8-2	WRERGYDYDGYYYAMDY	7	0.025025
1814	wt	IGHV3-6	AGGNYYA	6	0.02145
1815	wt	IGHV1-82	ARGEGLRSMDY	14	0.0500501
1816	wt	IGHV3-6	ASGGYWYF	5	0.017875
1829	wt	IGHV8-8	ARTLYYGSPRYFDV	7	0.025025
1835	wt	IGHV9-3	ARSRWLPRFDY	6	0.02145
1838	wt	IGHV4-1	ARITFYYYGSTYAMDY	18	0.0643501
1839	wt	IGHV3-6	ATNYYGSRFSWYFDV	68	0.2431
1841	wt	IGHV3-6	ARDRIYYGSTYLYYAMDY	25	0.0893751
1844	wt	IGHV6-3	TSTVVPLYAMDY	17	0.0607751
1848	wt	IGHV1-19	ARYYDGYYFDY	4	0.0143
1853	wt	IGHV1-22	ARSGYYWYFDV	8	0.0286
1858	wt	IGHV3-6	ARERDFGYAMDY	42	0.15015
1859	wt	IGHV3-6	ARASNLYYYGSSVYY	3	0.010725
1860	wt	IGHV9-3	ARWIYYGNPFDY	9	0.032175
1862	wt	IGHV8-12	ARRADFWFAY	6	0.02145
1864	wt	IGHV1-9	ARYRTWEFGY	2	0.00715001
1867	wt	IGHV1-53	ARLPP	3	0.010725
1868	wt	IGHV9-2	ARDGSSYWYFDV	3	0.010725
1869	wt	IGHV13-2	SRSGFAY	14	0.0500501
1870	wt	IGHV9-3	ARDYGSSYGDY	3	0.010725
1877	wt	IGHV13-2	SRGDYDAMDY	18	0.0643501
1878	wt	IGHV3-6	ASGLDAMDY	85	0.303875
1880	wt	IGHV3-6	ARDGDPSRYAMDY	49	0.175175
1884	wt	IGHV3-6	ARGCLHYFDY	34	0.12155
1886	wt	IGHV9-3	ARAYGSSYFYAMDY	4	0.0143
1889	wt	IGHV1-5	TRGFAY	4	0.0143
1893	wt	IGHV8-8	ARIAESYYYGSPPAWFAY	11	0.039325
1894	wt	IGHV6-3	TEVRDWDVFAY	16	0.0572001
1895	wt	IGHV1-61	ARSSLLLYYFDY	6	0.02145
1896	wt	IGHV6-6	TRRFITTVVASYYFDY	5	0.017875
1898	wt	IGHV4-1	ARGLPYAMDY	7	0.025025
1899	wt	IGHV1-81	ARPESSRRGTGYYAMDY	3	0.010725
1902	wt	IGHV10-3	VREGSSYLFAY	10	0.03575
1907	wt	IGHV10-3	VRDGGVVAFDY	12	0.0429
1908	wt	IGHV3-6	ARMEDYGSSYDY	47	0.168025
1909	wt	IGHV3-4	ARGDGYWYFDV	15	0.0536251
1910	wt	IGHV10-3	VRDEDYGWFAY	18	0.0643501
1913	wt	IGHV9-4	ARSIYYYERGFDY	4	0.0143
1914	wt	IGHV1-26	ARDTTVAFPDY	7	0.025025
1918	wt	IGHV6-3	TSLLLRGY	52	0.1859
1919	wt	IGHV1-42	AGGDYGSDYYAMDY	2	0.00715001
1922	wt	IGHV13-2	SRGYYSNHYGDYYAMDY	4	0.0143
1928	wt	IGHV6-6	TEWFAY	10	0.03575
1935	wt	IGHV6-6	IKGSWGGSSPYYFDY	2	0.00715001
1936	wt	IGHV1-7	ARSGYYGSGL	2	0.00715001
1941	wt	IGHV1-18	ARFHYGNFYYFDY	8	0.0286
1945	wt	IGHV6-3	TVDYYGSSYVGY	76	0.2717
1946	wt	IGHV6-3	TGQGTTVQNY	52	0.1859
1947	wt	IGHV1-72	ARLLPYYYA	2	0.00715001
1948	wt	IGHV1-78	ARDALGPYYYGSSYYAMDY	22	0.0786501
1949	wt	IGHV8-12	ARSQIYYDYGGFAY	6	0.02145
1951	wt	IGHV1-42	ARKGDPAWFAY	2	0.00715001
1953	wt	IGHV9-1	VRNDYGGFAY	3	0.010725
1955	wt	IGHV3-6	KSPGQYGLWF	2	0.00715001
1956	wt	IGHV6-3	TEGYDYFWYFDV	50	0.17875
1959	wt	IGHV3-6	ARNYYGSSYYFDY	61	0.218075
1960	wt	IGHV1-42	ARVYDGYCFDY	5	0.017875
1962	wt	IGHV3-6	ASYYDYDWD	16	0.0572001
1967	wt	IGHV6-3	KQYYYGSSPYAMDY	2	0.00715001
1968	wt	IGHV1-63	AREDYYGTFAY	4	0.0143
1979	wt	IGHV4-1	ARPLYGYGYAMDY	5	0.017875
1982	wt	IGHV3-6	ASYDSQYFDY	32	0.1144
1985	wt	IGHV8-8	ARIANYDYDGVYFDY	12	0.0429
1986	wt	IGHV9-3	ARFRLREMDY	4	0.0143
1987	wt	IGHV2-9-1	ASLYSKNWFAY	11	0.039325
1989	wt	IGHV3-6	ARGYGRVPYWYFD	5	0.017875
1991	wt	IGHV9-1	VPYYYGSGGFGY	8	0.0286
1992	wt	IGHV10-3	VREDYSKDYAMDY	22	0.0786501
1997	wt	IGHV14-4	TTRYYGSSYCAMDY	2	0.00715001
1999	wt	IGHV6-3	TGPYYYGSSGVAY	67	0.239525
2004	wt	IGHV9-3	ATLCKGWFAY	6	0.02145
2007	wt	IGHV1-5	TRSGDGYYVFAY	2	0.00715001
2009	wt	IGHV6-3	TPLGHAMDY	39	0.139425
2014	wt	IGHV2-9-1	ARRYDYYAMDY	2	0.00715001
2016	wt	IGHV6-3	TEGRGYFDV	2	0.00715001
2017	wt	IGHV10-3	VRGGSSPYYYAMDY	17	0.0607751
2018	wt	IGHV1-4	ARWWIPYGGY	42	0.15015
2021	wt	IGHV1-19	ARHYSNYYAMDY	6	0.02145
2025	wt	IGHV5-4	ARDSTTVVATRYAMDY	2	0.00715001
2032	wt	IGHV1-26	AIYYGYDEGYAMDY	6	0.02145
2052	wt	IGHV1-11	GRRGYGSSYAMDY	6	0.02145
2053	wt	IGHV3-6	ARDFDV	25	0.0893751
2056	wt	IGHV8-12	ARRGYYYGSSWFAY	7	0.025025
2058	wt	IGHV6-3	TITTVVAPDWYF	6	0.02145
2063	wt	IGHV3-1	ARDTGSIYDGYSPWYFDV	12	0.0429
2065	wt	IGHV6-3	TYYSNFYAM	7	0.025025
2066	wt	IGHV3-6	ARAVYDYDAWFA	4	0.0143
2068	wt	IGHV3-6	ARHYYGSRNYYAMDY	42	0.15015
2070	wt	IGHV6-3	TPAWDY	37	0.132275
2082	wt	IGHV10-1	VRQGVTFDY	12	0.0429
2083	wt	IGHV15-2	ARSYYYGSSYFDY	25	0.0893751
2089	wt	IGHV3-6	AIITTVVANWYFDV	35	0.125125
2095	wt	IGHV8-8	ARYGTTVVAEFYYYAMDY	2	0.00715001
2096	wt	IGHV8-8	ARIGAYDGYRFDY	11	0.039325
2099	wt	IGHV1-18	ARWRGAVTTVVADYYAMDY	4	0.0143
2104	wt	IGHV9-3	APYYYGSRRFDY	10	0.03575
2105	wt	IGHV1-18	ARRGRWLLLWYFDV	4	0.0143
2106	wt	IGHV8-8	ARIALFPFITTHDYFD	2	0.00715001
2107	wt	IGHV7-3	ARSYGNYPWYFDV	2	0.00715001
2111	wt	IGHV1-26	ARGERNYDGYPWFAY	5	0.017875
2114	wt	IGHV1-42	ASSPLDY	3	0.010725
2115	wt	IGHV10-1	VRRGAMD	2	0.00715001
2120	wt	IGHV7-3	ARSPYYYGSSWGYFDV	7	0.025025
2122	wt	IGHV7-3	ARYGDYGSSHTGFAY	15	0.0536251
2123	wt	IGHV8-8	ARIGGLPFAY	6	0.02145
2124	wt	IGHV6-3	TGRGGGPRAMDY	22	0.0786501
2125	wt	IGHV5-16	ARDYGVYYGNYGDAMDY	16	0.0572001
2130	wt	IGHV5-16	ARNWDYGSSYWYFDV	7	0.025025
2131	wt	IGHV6-6	TSSPFPTGPFAY	8	0.0286
2134	wt	IGHV3-6	AREGGLPLDYFD	6	0.02145
2139	wt	IGHV1-78	AREGEDY	8	0.0286
2140	wt	IGHV1-49	ARGYGTIFAY	2	0.00715001
2141	wt	IGHV2-2	ARKNYDYDNDYYAMDY	4	0.0143
2142	wt	IGHV8-12	ARVGAYSNYAMDY	5	0.017875
2146	wt	IGHV3-6	ARDLETYYSNPYYYAMD	2	0.00715001
2147	wt	IGHV6-3	TGGGWPTTWRAMDY	55	0.196625
2151	wt	IGHV1-11	GRGGAMDY	4	0.0143
2152	wt	IGHV13-2	SRSEGTTVVARDYYAMDY	12	0.0429
2153	wt	IGHV1-26	ARDCYYGSSCAMDY	10	0.03575
2163	wt	IGHV3-6	GSGNYDYDVGFA	3	0.010725
2164	wt	IGHV1-19	ARSLRGLDYYAMDY	18	0.0643501
2165	wt	IGHV1-78	ARNELRLDYWYFDV	16	0.0572001
2172	wt	IGHV1-18	ARNERYYAMDY	5	0.017875
2173	wt	IGHV2-2	ARNSDYYSNTDYYAMDY	5	0.017875
2178	wt	IGHV1-19	ARDYSNPYYAMDY	7	0.025025
2179	wt	IGHV3-1	ARSPIYYGNYYFDY	8	0.0286
2180	wt	IGHV1-82	ARKCNRDYYYAMDY	2	0.00715001
2182	wt	IGHV10-1	VGGNYLFAY	13	0.046475
2184	wt	IGHV5-4	ARDKSYSNYKYFDV	2	0.00715001
2185	wt	IGHV1-39	ARYYSNYYAMDY	19	0.0679251
2186	wt	IGHV9-1	VRRGYYGSSYGYFDV	13	0.046475
2188	wt	IGHV14-3	ASPLYGSSGAMDY	3	0.010725
2192	wt	IGHV6-3	TGGTTVVPDY	10	0.03575
2194	wt	IGHV8-8	ARTKRVPTGYFDV	8	0.0286
2195	wt	IGHV6-6	TKSSSITTVVATDWYFDV	2	0.00715001
2199	wt	IGHV1-12	ARPLLLRYHWYF	2	0.00715001
2200	wt	IGHV9-3	AREGYSNYEVYFDY	9	0.032175
2203	wt	IGHV10-3	VRNYGNGYAMDY	8	0.0286
2205	wt	IGHV1-19	ANYYGSSYWYFDV	5	0.017875
2207	wt	IGHV14-3	ARDYYGSGGAMDY	2	0.00715001
2211	wt	IGHV1-18	AREGGYYSNYWFAY	2	0.00715001
2213	wt	IGHV8-12	ARIYDGYLYYFDY	11	0.039325
2214	wt	IGHV1-81	AMDATTVVGG	4	0.0143
2215	wt	IGHV2-6	NDQPSGNLPFLKPDDIQYF	5	0.017875
2216	wt	IGHV3-6	ARDGYYGSSPHFDY	65	0.232375
2217	wt	IGHV3-6	ARDQVTTGNWYFDV	43	0.153725
2221	wt	IGHV5-9-1	TRDRARSTFFDY	2	0.00715001
2224	wt	IGHV1-54	AYEGFAY	2	0.00715001
2227	wt	IGHV8-8	ARIGVTTVVPRYYAMDY	29	0.103675
2228	wt	IGHV6-3	TGLITTVVAHYYAMDY	20	0.0715001
2229	wt	IGHV3-6	ARDQVTTGNWY	6	0.02145
2232	wt	IGHV1-81	ARVGIYYGNYCAMDY	2	0.00715001
2233	wt	IGHV1-4	ARPNYGAMDY	4	0.0143
2234	wt	IGHV3-8	ASSLYGSSPNWYFDV	13	0.046475
2237	wt	IGHV6-3	TGDYYGSSYWYFDV	17	0.0607751
2238	wt	IGHV6-3	TRNYYGSRDAM	2	0.00715001
2242	wt	IGHV1-69	ARRGIYYYGSSGLRKGYYFDY	9	0.032175
2247	wt	IGHV10-3	VVSAWFAY	4	0.0143
2248	wt	IGHV3-6	ARGRVYYYAPFAY	71	0.253825
2252	wt	IGHV5-4	ARDHYYYGSSPHYYAMDY	3	0.010725
2254	wt	IGHV1-26	ARGYYGSRAWFAY	2	0.00715001
2255	wt	IGHV5-4	ARDGIYYDYLRFAY	3	0.010725
2257	wt	IGHV6-6	TEWFA	2	0.00715001
2258	wt	IGHV7-1	ARDATYDGYYPYAMDY	13	0.046475
2259	wt	IGHV1-78	LYYGYLAWFA	2	0.00715001
2260	wt	IGHV8-8	ARYYYGSRGFAY	9	0.032175
2264	wt	IGHV8-12	ARKDYYGSSSFAY	12	0.0429
2266	wt	IGHV1-26	ASRNYDDWYFDV	3	0.010725
2268	wt	IGHV3-1	ARDYDYDSAWFAY	19	0.0679251
2271	wt	IGHV7-3	ARFYGSSLYAMDY	5	0.017875
2278	wt	IGHV8-8	ARIGAYDGYRFD	2	0.00715001
2283	wt	IGHV9-1	VRATVVATGDYFDY	6	0.02145
2284	wt	IGHV1-31	AREGETGRRDYYAMDY	5	0.017875
2285	wt	IGHV1-78	ARGAYYSNYDWYFDV	25	0.0893751
2286	wt	IGHV9-3	AKTPFTTVVGFDY	9	0.032175
2287	wt	IGHV3-6	ARDDGSSYVKHYAMDY	22	0.0786501
2288	wt	IGHV1-39	ARLDYYGSWGFDV	10	0.03575
2291	wt	IGHV3-6	ARDYGSRYFDV	73	0.260975
2295	wt	IGHV3-6	ARDRLAWF	4	0.0143
2296	wt	IGHV9-3	ARGITTVVATGAY	2	0.00715001
2298	wt	IGHV2-6-1	ARHEDYYGSSYHYYAMDY	2	0.00715001
2300	wt	IGHV1-19	ARRGSSPDYYAMDY	5	0.017875
2302	wt	IGHV9-3	ARSLTGSFDY	3	0.010725
2304	wt	IGHV2-9	AKRDYYGSSYDHYYAMDY	3	0.010725
2310	wt	IGHV5-4	ARDPNDGYYAMDY	3	0.010725
2312	wt	IGHV1-42	ARGSNYVGWFAY	8	0.0286
2314	wt	IGHV14-3	ARRPITTVVGGDYFDY	12	0.0429
2316	wt	IGHV10-3	VREGDGYYEGFAY	15	0.0536251
2317	wt	IGHV1-26	ANWVFITTVVENYYAMDY	9	0.032175
2318	wt	IGHV3-6	ARLGALYYGSSSSFD	4	0.0143
2323	wt	IGHV6-3	TGYYGYAM	2	0.00715001
2333	wt	IGHV7-1	ARDPMGRGEMDYAMDY	5	0.017875
2335	wt	IGHV3-6	ARDPYYYAMDY	53	0.189475
2336	wt	IGHV1-18	ARWGYSKGFHYYAMDY	8	0.0286
2339	wt	IGHV10-3	VRDYGSSWSWYFDV	16	0.0572001
2341	wt	IGHV3-6	ARDRGLLRYWY	3	0.010725
2342	wt	IGHV9-2	AKGGYYSFAMDY	14	0.0500501
2343	wt	IGHV9-4	ARSYYGSSYFD	3	0.010725
2345	wt	IGHV1-26	ARRYWDYAMDY	11	0.039325
2346	wt	IGHV3-6	ARDLETYYSNPYYY	2	0.00715001
2347	wt	IGHV6-3	TEDAMDY	58	0.20735
2348	wt	IGHV1-64	ADGYYAY	3	0.010725
2352	wt	IGHV8-12	ARRIYDGYY	8	0.0286
2354	wt	IGHV1-9	AIPSHLRGYAMDY	3	0.010725
2357	wt	IGHV3-6	ARDGYYGSYYAMDY	14	0.0500501
2359	wt	IGHV5-16	AKMGYYGPYWYFDV	5	0.017875
2360	wt	IGHV9-3	ARIRAWFAY	8	0.0286
2361	wt	IGHV14-3	AGNLGNFDY	2	0.00715001
2362	wt	IGHV2-3	AKPHDYDEGLAY	13	0.046475
2364	wt	IGHV1-69	ARPATVVEDYAMDY	2	0.00715001
2367	wt	IGHV3-6	ARGGNTWFAY	34	0.12155
2374	wt	IGHV1-39	ALPYYSNDWYFDV	16	0.0572001
2376	wt	IGHV7-4	VKAVRFDV	24	0.0858001
2377	wt	IGHV1-7	ARLDGYYAMDY	9	0.032175
2378	wt	IGHV1-53	ARGVVPYYAMDY	6	0.02145
2380	wt	IGHV9-3	ARYGSFAY	5	0.017875
2381	wt	IGHV10-3	VRGGWFRSLSAPYDYYAMDY	14	0.0500501
2382	wt	IGHV6-3	TVYHPYAM	3	0.010725
2385	wt	IGHV6-6	TRGGLRRPGYYAMDY	13	0.046475
2388	wt	IGHV8-8	ARIGEGLRRVYYAMDY	16	0.0572001
2391	wt	IGHV9-3	ATLYYGSSPDY	11	0.039325
2396	wt	IGHV3-4	ARGLFYYYGSSPYYAM	5	0.017875
2403	wt	IGHV9-4	ARSYYGSSYFDY	15	0.0536251
2406	wt	IGHV1-9	ASRFVY	17	0.0607751
2411	wt	IGHV9-2	ARSAYSYYAMDY	6	0.02145
2414	wt	IGHV1-26	ARGLPPWFAY	3	0.010725
2417	wt	IGHV10-1	VRHEVGWAFDY	29	0.103675
2419	wt	IGHV1-54	ALYGSSYRDMDY	6	0.02145
2425	wt	IGHV10-1	VSPFITTAAGYFDV	5	0.017875
2430	wt	IGHV8-8	ARIADSWFAY	9	0.032175
2436	wt	IGHV6-3	TNYYGSRGGAMD	4	0.0143
2437	wt	IGHV3-8	AKYAIYFDY	9	0.032175
2438	wt	IGHV3-6	AISVLWSKWFAY	64	0.2288
2439	wt	IGHV10-3	VRGVVY	12	0.0429
2442	wt	IGHV3-6	ARANWDWYFDV	65	0.232375
2444	wt	IGHV1-18	ARLDGYYLYYYAMDY	9	0.032175
2445	wt	IGHV8-12	ARRGVYDGYPLYAMDY	11	0.039325
2448	wt	IGHV5-9-1	TREVGEWDGYYAMDY	3	0.010725
2450	wt	IGHV9-1	VRHYYGSSSYYFDY	3	0.010725
2454	wt	IGHV9-1	VKGKYYFDY	5	0.017875
2460	wt	IGHV6-6	TRPRGYDGYPYYFDY	4	0.0143
2462	wt	IGHV3-6	ARGAYYGNYEAWFA	6	0.02145
2464	wt	IGHV3-6	ARDEDYYGSSPGAY	26	0.0929501
2467	wt	IGHV1-78	ARWAYGSRGYFD	6	0.02145
2471	wt	IGHV1-42	ARGATVPDY	3	0.010725
2472	wt	IGHV8-8	ARKVDYYGSSYLDY	12	0.0429
2480	wt	IGHV1-78	ARSRAMD	2	0.00715001
2487	wt	IGHV9-3	ARSGDEIDY	14	0.0500501
2498	wt	IGHV1-39	ARLLLGYYAMDY	10	0.03575
2501	wt	IGHV3-6	ARKDSNYRSWFA	2	0.00715001
2502	wt	IGHV1-7	ASLLHYYGSSYVDY	7	0.025025
2503	wt	IGHV6-3	TGGERAMDY	59	0.210925
2506	wt	IGHV9-4	ARFDYEDAMDY	15	0.0536251
2511	wt	IGHV5-16	ARDQDYYGSSYWYFDV	24	0.0858001
2513	wt	IGHV1-22	AREEDRGLRFAY	4	0.0143
2515	wt	IGHV3-6	ASDERGFAY	46	0.16445
2518	wt	IGHV5-16	ARVQGDPDWYFDV	8	0.0286
2523	wt	IGHV14-3	ANYYGSSSYYYAMDY	8	0.0286
2524	wt	IGHV1-31	ARSYGYDSCAMD	2	0.00715001
2534	wt	IGHV3-6	ARDPDYYGSSYWYFD	4	0.0143
2536	wt	IGHV1-19	ARDYGSSYGNYFDY	6	0.02145
2537	wt	IGHV3-3	ARGLISLGYFDV	25	0.0893751
2538	wt	IGHV6-3	AYYSNYVGFA	2	0.00715001
2543	wt	IGHV6-6	TRPGYSAWFAY	10	0.03575
2545	wt	IGHV8-8	ARIGVVAKDYYAMDY	11	0.039325
2547	wt	IGHV8-8	ARIGRLPAWFAY	2	0.00715001
2552	wt	IGHV1-9	TTVVATDAMDY	2	0.00715001
2554	wt	IGHV3-6	ASYDYEGYYAMDY	45	0.160875
2555	wt	IGHV3-6	ARDPIYYYGSSY	3	0.010725
2557	wt	IGHV3-6	AREGSNYGGAMD	6	0.02145
2559	wt	IGHV1-20	ARSKDYVEGFAY	13	0.046475
2562	wt	IGHV3-8	ARYDSIFYAMDY	13	0.046475
2566	wt	IGHV1-26	ARGAYYSNSDY	2	0.00715001
2567	wt	IGHV5-16	ARDRGPFDY	22	0.0786501
2574	wt	IGHV6-3	TYYYGSSYDYF	7	0.025025
2580	wt	IGHV3-6	ARGGNTWFA	5	0.017875
2582	wt	IGHV8-12	ARIITTVVDYAMDY	9	0.032175
2583	wt	IGHV6-3	TIYYSNFAMDY	25	0.0893751
2584	wt	IGHV1-19	ARRGIYYDYDGDYYAMDY	8	0.0286
2585	wt	IGHV3-6	ARSLRQGYFDY	36	0.1287
2586	wt	IGHV4-1	ARPGITTVVATDYAMDY	8	0.0286
2590	wt	IGHV1-72	AREGITTVPATRYYAMDY	3	0.010725
2593	wt	IGHV1-78	ARIYYDYA	3	0.010725
2595	wt	IGHV8-12	ARRAYDYDDY	9	0.032175
2598	wt	IGHV8-12	AGYGRGYYAMDY	5	0.017875
2599	wt	IGHV1-62-2	ARHEPYGNWYFDV	5	0.017875
2600	wt	IGHV3-1	AREVTLSFDY	27	0.0965251
2607	wt	IGHV15-2	ARGDYYAPFAY	4	0.0143
2610	wt	IGHV3-6	ARDRGRLPFD	4	0.0143
2615	wt	IGHV1-9	ARSTTVVARWYFDV	4	0.0143
2618	wt	IGHV1-26	ARGGDPYY	3	0.010725
2622	wt	IGHV6-3	TGLWYYGNWFAY	28	0.1001
2624	wt	IGHV10-1	VRQGYYGSSYYFDY	11	0.039325
2628	wt	IGHV1-52	ARWEQLRLQAMDY	2	0.00715001
2630	wt	IGHV8-8	ARIYYGYDEGLAY	11	0.039325
2631	wt	IGHV1-5	TSPYGSSYDYAMDY	3	0.010725
2636	wt	IGHV6-6	TRIYDGYY	3	0.010725
2638	wt	IGHV3-6	ARRSHYFDY	59	0.210925
2639	wt	IGHV9-3	ARWALYYGSSLWYFDV	2	0.00715001
2640	wt	IGHV1-58	ARLEPYYDYDEGYFDV	9	0.032175
2642	wt	IGHV6-6	TRLPAY	8	0.0286
2644	wt	IGHV1-50	ARGGGPYYFDY	2	0.00715001
2645	wt	IGHV1-77	ARELLRYSYAMDY	10	0.03575
2647	wt	IGHV1-26	ARYYYGSGYAMDY	8	0.0286
2648	wt	IGHV9-3	ARPYYYGSTLYYFDY	6	0.02145
2653	wt	IGHV15-2	ARLHYYGSSYEEVYYAMDY	37	0.132275
2655	wt	IGHV15-2	ARQDYYGSSYWYFDV	17	0.0607751
2659	wt	IGHV2-2	ASPNRGYAMDY	7	0.025025
2664	wt	IGHV1-78	ASPYYYGSSFDY	15	0.0536251
2668	wt	IGHV1-26	AREGYCYFDY	8	0.0286
2672	wt	IGHV6-3	TNYYGSRGGAMDY	37	0.132275
2676	wt	IGHV9-3	ARWGGFYAMDY	8	0.0286
2682	wt	IGHV1-76	ARGGYSHYYAMDY	4	0.0143
2683	wt	IGHV3-8	ARIGYYPWYFDV	4	0.0143
2684	wt	IGHV6-6	TRGDGYFYYYAMDY	13	0.046475
2685	wt	IGHV10-1	VRQYGSSLFAY	6	0.02145
2687	wt	IGHV7-3	ARYEGYYEGDAMDY	3	0.010725
2690	wt	IGHV10-1	VRHETSSDSNYEDYYAMDY	9	0.032175
2692	wt	IGHV5-2	ARHSYYTGFAY	7	0.025025
2699	wt	IGHV4-1	ARGGYYWYFDV	12	0.0429
2700	wt	IGHV1-50	ACNTFA	2	0.00715001
2703	wt	IGHV1-49	ARGDGNYFYAMDY	3	0.010725
2704	wt	IGHV6-3	TENYDYDWFAY	67	0.239525
2705	wt	IGHV1-12	AISNPYAMDY	8	0.0286
2706	wt	IGHV2-3-1	AHIYYDYNYAMDY	7	0.025025
2708	wt	IGHV8-4	AQSSDYYGHYFDY	10	0.03575
2709	wt	IGHV1-39	AREGAQVYYYAMDY	7	0.025025
2710	wt	IGHV1-62-2	ARHPRFYYGYDVEYYFDY	2	0.00715001
2711	wt	IGHV3-8	ARGSANWLWAMDY	11	0.039325
2712	wt	IGHV1-78	ARGDYFDY	19	0.0679251
2715	wt	IGHV15-2	ARRRPYWYFDV	7	0.025025
2724	wt	IGHV8-8	ARIGYYEGKYF	2	0.00715001
2727	wt	IGHV1-78	ARGYGNPSWFAY	8	0.0286
2728	wt	IGHV4-1	ARRYGYDPFAY	20	0.0715001
2729	wt	IGHV1-75	ARYHYYYGSSDY	5	0.017875
2730	wt	IGHV1-26	ARETYYSNYQAYAMDY	2	0.00715001
2732	wt	IGHV1-26	ARGVIYYYGSSYDYYAMDY	12	0.0429
2734	wt	IGHV6-6	TTGDGYEV	16	0.0572001
2740	wt	IGHV9-3	AREGGYYYGSSSYYYA	2	0.00715001
2743	wt	IGHV3-5	ARDNWGYGSSLWYFDV	4	0.0143
2746	wt	IGHV10-3	VRDNHYYGSRSGNFDY	17	0.0607751
2748	wt	IGHV6-3	NTVVEDFDY	56	0.2002
2756	wt	IGHV9-1	VRFYDGYYPWAMDY	3	0.010725
2757	wt	IGHV3-5	ARDDGSSYWYFDV	20	0.0715001
2761	wt	IGHV1-5	TYAMDY	6	0.02145
2762	wt	IGHV1-36	SEDSAVYYCACNTFAY	8	0.0286
2765	wt	IGHV5-4	AREGSYYYGSSYGFDY	10	0.03575
2769	wt	IGHV9-4	AALWPTGDFDY	2	0.00715001
2770	wt	IGHV10-3	VRDGWSHAMDY	19	0.0679251
2771	wt	IGHV3-6	ARGYDYDGAMDY	38	0.13585
2774	wt	IGHV1-26	ARVYGSSY	10	0.03575
2777	wt	IGHV10-1	VRHHDGYSLMDY	7	0.025025
2778	wt	IGHV1-78	ARYYYDYDAYAM	7	0.025025
2780	wt	IGHV1-26	ARRIANWAPYYFDY	4	0.0143
2791	wt	IGHV1-18	ARSKWVVGYFDY	9	0.032175
2794	wt	IGHV2-2	AGEGENYAMDY	15	0.0536251
2798	wt	IGHV8-8	ARIALFPFITTHDYFDY	19	0.0679251
2799	wt	IGHV6-3	TDYYRGAM	4	0.0143
2800	wt	IGHV8-8	ARIGDDYDGGDYFDY	18	0.0643501
2804	wt	IGHV3-6	ARDRTTVVPWYFDV	6	0.02145
2807	wt	IGHV5-17	ARTYYYGSSSRDAMDY	3	0.010725
2810	wt	IGHV1-9	ARSGDYYGSY	2	0.00715001
2812	wt	IGHV4-1	ARLTGLPFAY	7	0.025025
2813	wt	IGHV5-17	AKTYDPPYAMDY	2	0.00715001
2815	wt	IGHV15-2	ARKEGDYYGSSYWYFDV	23	0.0822251
2817	wt	IGHV7-3	ARCNYYGSSPWFAY	7	0.025025
2819	wt	IGHV13-2	SRTGFDY	4	0.0143
2821	wt	IGHV10-1	VRLGIYYYGSSPPYYAMDY	2	0.00715001
2824	wt	IGHV3-6	ARGYDYDGAM	3	0.010725
2826	wt	IGHV1-9	ARKGSTAQATFLYAMDY	5	0.017875
2829	wt	IGHV9-3	ARSWPYGGFAY	2	0.00715001
2838	wt	IGHV1-26	ARGFYYDYDGFAY	5	0.017875
2839	wt	IGHV1-58	ARGRWLRTDAMDY	7	0.025025
2842	wt	IGHV3-6	ERGGEGMDY	3	0.010725
2843	wt	IGHV3-6	ARDVLLWAMDY	48	0.1716
2846	wt	IGHV3-6	ARDQEGLLAW	2	0.00715001
2847	wt	IGHV13-2	VEPPTVVAPITMLWTT	9	0.032175
2852	wt	IGHV1-20	ARATVVAKPYFDY	6	0.02145
2854	wt	IGHV6-6	TRRSGLREDYAMDY	18	0.0643501
2856	wt	IGHV8-8	ARKPITTVVKNYFDY	13	0.046475
2858	wt	IGHV1-26	ARRRGGIYYDYDGSSYYAMDY	4	0.0143
2862	wt	IGHV7-1	ARDPYDYDGHWYFDV	7	0.025025
2866	wt	IGHV12-3	AGDRDYYGSPQFAY	6	0.02145
2869	wt	IGHV1-18	VSGYYGSSYEVDY	3	0.010725
2870	wt	IGHV9-3	ARGAVVAPYWYFDV	3	0.010725
2871	wt	IGHV3-6	ARDQVTTGNWYFD	5	0.017875
2875	wt	IGHV1-19	ARRQLRLRFAY	9	0.032175
2882	wt	IGHV1-58	ARYGNYPSYAMDY	6	0.02145
2887	wt	IGHV6-3	TGSWLLHAMDY	35	0.125125
2889	wt	IGHV5-16	ARRTDGYYPYYFDY	15	0.0536251
2891	wt	IGHV1-63	ARSDYYGSPWFAY	39	0.139425
2894	wt	IGHV1-26	ARLGYYGSSYFDY	5	0.017875
2896	wt	IGHV6-6	TRPTGTAWFAY	13	0.046475
2899	wt	IGHV1-11	GRDYDFGY	2	0.00715001
2900	wt	IGHV1-36	ARGGYYAMDY	5	0.017875
2902	wt	IGHV8-8	ARPLYYGNYVGYAMDY	8	0.0286
2903	wt	IGHV3-6	AREGMTTQATPYAMDY	14	0.0500501
2904	wt	IGHV1-19	ARWSGYYGSSCLDY	3	0.010725
2907	wt	IGHV1-26	ARRRRLDSSGYLLDY	2	0.00715001
2908	wt	IGHV3-6	AREGGLPLDYF	5	0.017875
2913	wt	IGHV6-3	TGGAYGNYSWFA	8	0.0286
2918	wt	IGHV10-3	VREPYLWLRQGGFDY	11	0.039325
2920	wt	IGHV3-6	ASYDYEGYYAMD	2	0.00715001
2921	wt	IGHV1S15	AIYYYGSSYGWFAY	2	0.00715001
2923	wt	IGHV8-8	ARIEMDYGSSYGY	13	0.046475
2929	wt	IGHV3-6	ARERTIYFAFAY	5	0.017875
2930	wt	IGHV1-75	ARGEDSNPFAY	2	0.00715001
2933	wt	IGHV1-26	ARGGWLLSYYFDY	7	0.025025
2934	wt	IGHV1-9	ARVRYDYDWYFDV	7	0.025025
2935	wt	IGHV3-6	ARERDFGYAM	3	0.010725
2938	wt	IGHV1-19	ARSGNTTALDY	7	0.025025
2939	wt	IGHV1-36	ARGYDGYPFAY	5	0.017875
2943	wt	IGHV1-26	ARGDYDGYYYAMDY	6	0.02145
2944	wt	IGHV3-6	ARGGVTTKVSYYYA	3	0.010725
2948	wt	IGHV1-12	AREGILITTVGIGY	3	0.010725
2949	wt	IGHV2-2	ARKGLPMDFDV	12	0.0429
2953	wt	IGHV3-6	ARDSKGFAY	22	0.0786501
2954	wt	IGHV6-3	TGGYNDY	36	0.1287
2955	wt	IGHV4-1	ARERVTNWYFDV	7	0.025025
2957	wt	IGHV9-4	ARGGGIITTLDYFDY	15	0.0536251
2958	wt	IGHV1-36	ARRGYYDYDGFAY	2	0.00715001
2960	wt	IGHV1-54	ARYGFYAMDY	4	0.0143
2961	wt	IGHV8-8	ARINQGDYYGSSYGYFDV	9	0.032175
2966	wt	IGHV1-5	TNFYYYGSSYGYAMDY	3	0.010725
2969	wt	IGHV3-1	AREHYGNSWFAY	6	0.02145
2973	wt	IGHV6-6	THTRRGYYAMDY	3	0.010725
2980	wt	IGHV8-8	ARIAHWDVFMDY	16	0.0572001
2981	wt	IGHV6-6	TRNYGSSYWYFDV	14	0.0500501
2982	wt	IGHV2-2	ARNSYYYGSSTDV	8	0.0286
2983	wt	IGHV8-8	ARMRSYDYDGNYYAMDY	10	0.03575
2984	wt	IGHV1-11	GRGIYYDYVPFAY	5	0.017875
2985	wt	IGHV1-69	ARRENGNYGEVYYAMDY	4	0.0143
2986	wt	IGHV1-26	ARDGSPYWYFDV	3	0.010725
2989	wt	IGHV6-6	TRRVITTVVGDY	5	0.017875
2992	wt	IGHV3-6	ARDRGYDGQTGGDAM	3	0.010725
2995	wt	IGHV6-3	TEGYDYFWYFD	3	0.010725
2997	wt	IGHV8-12	ARSEGTGSEAMDY	3	0.010725
3004	wt	IGHV8-12	ARRRDGSSYDY	8	0.0286
3006	wt	IGHV3-6	ARERYYGSRGYYAMDY	38	0.13585
3009	wt	IGHV14-3	ARGYYEGDYYAMDY	8	0.0286
3010	wt	IGHV7-1	ARAAYYRAMDY	12	0.0429
3011	wt	IGHV1-5	TRAYYGSSWAWFAY	2	0.00715001
3012	wt	IGHV1-7	ARSGYDGYYYAMDY	5	0.017875
3014	wt	IGHV2-2	ARDPYDYDAVAMDY	10	0.03575
3015	wt	IGHV13-2	SRYDGYSNAMDY	7	0.025025
3018	wt	IGHV2-6	ASDNYGSSYVDY	6	0.02145
3019	wt	IGHV6-3	TGGGYYYGSNWYFDV	25	0.0893751
3022	wt	IGHV3-6	ARGASIYYGNFDY	2	0.00715001
3025	wt	IGHV1-22	ARGPPIITTVVATRAMDY	4	0.0143
3026	wt	IGHV9-3	AKEDPIYYYGRRYFDV	4	0.0143
3028	wt	IGHV1-39	ARSRNWDEGMDY	6	0.02145
3029	wt	IGHV1-76	ARFGIYWYFDV	4	0.0143
3031	wt	IGHV1-20	ARSKDY	10	0.03575
3036	wt	IGHV10-1	VRQAYGSSYAMDY	10	0.03575
3037	wt	IGHV10-1	VRDTTDSFAY	12	0.0429
3038	wt	IGHV8-12	ARRGGYDYAYWYFDV	5	0.017875
3040	wt	IGHV8-8	ARMDAMDY	7	0.025025
3041	wt	IGHV9-3	ARVYDAYLDAMDY	10	0.03575
3046	wt	IGHV6-6	TDSPFAY	16	0.0572001
3048	wt	IGHV6-6	TRKGNSWYFDV	9	0.032175
3053	wt	IGHV1-7	ARHYLRYYAMDY	4	0.0143
3055	wt	IGHV1-54	ARVPPYYYGSSYGYFDV	4	0.0143
3056	wt	IGHV3-6	AREGHWYFDV	3	0.010725
3060	wt	IGHV1-7	ARVPYYYGSSY	5	0.017875
3061	wt	IGHV9-3	ATFAWFA	2	0.00715001
3063	wt	IGHV1-20	ARGIYDGYYEGYAMDH	2	0.00715001
3065	wt	IGHV1-26	ARPFLPSEDAMDY	7	0.025025
3066	wt	IGHV3-6	ARDLETYYSNPYYYA	5	0.017875
3067	wt	IGHV1-49	ARSYYSNYGDAMDY	3	0.010725
3068	wt	IGHV5-9-1	TREGPMDY	2	0.00715001
3069	wt	IGHV1-39	ARGEEKVDYFDY	13	0.046475
3072	wt	IGHV3-6	AREGSSGYADY	54	0.19305
3079	wt	IGHV3-6	AAGDFD	4	0.0143
3080	wt	IGHV4-1	ARPDSNYGYFDV	9	0.032175
3081	wt	IGHV1-80	ARYGSSIDY	5	0.017875
3082	wt	IGHV1-18	AKNSDYYGSSYWYFDV	2	0.00715001
3083	wt	IGHV6-3	TVYHPYAMD	2	0.00715001
3084	wt	IGHV5-4	ARGWGYFDY	3	0.010725
3085	wt	IGHV14-3	ARARIYYYGSSPFAY	3	0.010725
3086	wt	IGHV1-75	ARGDYSNYEGY	10	0.03575
3087	wt	IGHV1-26	ARGDYYAM	2	0.00715001
3091	wt	IGHV8-12	ARRVGYSNSHWYFDV	5	0.017875
3095	wt	IGHV1-72	ARETTVVARNYFDY	11	0.039325
3099	wt	IGHV3-5	ARDSYYGSS	3	0.010725
3104	wt	IGHV1-62-2	ARHEEYYYGSSGGWFAY	5	0.017875
3106	wt	IGHV5-4	ARDRNYDRGRFAY	4	0.0143
3111	wt	IGHV10-1	VSPITTVSEGFAY	2	0.00715001
3112	wt	IGHV5-16	AREGYYYFDY	9	0.032175
3118	wt	IGHV1-26	AREGKNEDYDYFDY	11	0.039325
3124	wt	IGHV3-8	AVGYGSLYYYAMDY	17	0.0607751
3126	wt	IGHV1-66	AREGSRYGSSYEEY	2	0.00715001
3127	wt	IGHV2-2	ARNYGYVLDY	6	0.02145
3128	wt	IGHV9-3	ARYEKYDYPYAMDY	7	0.025025
3129	wt	IGHV1-18	ARKEFYYAMDY	3	0.010725
3132	wt	IGHV1-22	ARPPSYYDYDGYAMDY	10	0.03575
3135	wt	IGHV1-18	ARKEELWFAY	4	0.0143
3139	wt	IGHV1-39	ARNFDY	8	0.0286
3142	wt	IGHV5-16	ARGRYYYGSSSFDY	4	0.0143
3146	wt	IGHV8-8	ARGTTVVVPSYWYFDV	6	0.02145
3148	wt	IGHV8-8	ARIDYGSSWYFDV	11	0.039325
3150	wt	IGHV6-6	TRGLLLDYFDY	8	0.0286
3152	wt	IGHV1-80	ARYGANWVFDY	2	0.00715001
3153	wt	IGHV9-3	ARQCLYYDYDGAY	4	0.0143
3156	wt	IGHV1-58	AKGDTTVVFDY	10	0.03575
3157	wt	IGHV10-1	VTGYGSSYASFAY	7	0.025025
3159	wt	IGHV6-6	TSLLLRYWYFDV	7	0.025025
3164	wt	IGHV3-6	ARGYYGETFD	2	0.00715001
3170	wt	IGHV1-26	ARGNGSSPCAMDY	2	0.00715001
3173	wt	IGHV8-8	ARIYYYGSSYLGFAY	13	0.046475
3174	wt	IGHV8-6	ARIYGSRVGWYF	2	0.00715001
3176	wt	IGHV1-54	LIHFDY	2	0.00715001
3180	wt	IGHV1-14	AGYSNLFAY	4	0.0143
3182	wt	IGHV4-1	ARLLLGRYFDV	9	0.032175
3184	wt	IGHV1-18	AREDHSNYEGAMDY	4	0.0143
3188	wt	IGHV8-8	ARIPHYYGSVAGFAY	5	0.017875
3190	wt	IGHV8-12	ARNDYDRYYFDY	8	0.0286
3191	wt	IGHV1-12	AREAYYDYDGAWFAY	2	0.00715001
3192	wt	IGHV8-12	ARVYGNYYFD	2	0.00715001
3193	wt	IGHV6-6	TVNLGDV	19	0.0679251
3196	wt	IGHV3-6	ARLGALYYGSSSSFDY	15	0.0536251
3198	wt	IGHV5-16	ARDAGLRRGYYFDY	16	0.0572001
3199	wt	IGHV1-19	ARSLYYYHFDY	17	0.0607751
3200	wt	IGHV3-6	AGTTGRAMD	4	0.0143
3201	wt	IGHV15-2	AYYSNYVLYAMDY	2	0.00715001
3202	wt	IGHV1-69	AILYAMDY	7	0.025025
3206	wt	IGHV4-1	ARLYYDYDGGSFFDY	10	0.03575
3213	wt	IGHV1-49	ARSGGRGSFAY	2	0.00715001
3214	wt	IGHV13-2	SRSGDGYYGYFDV	3	0.010725
3215	wt	IGHV1-26	ARSGDGYLDY	4	0.0143
3219	wt	IGHV1-42	ARLYGSSYRWYFDV	12	0.0429
3221	wt	IGHV1-42	ARGGALYYGNYEGFAY	7	0.025025
3223	wt	IGHV7-1	ARDSDGYYAFAY	13	0.046475
3225	wt	IGHV3-8	ARYRTVVAPFDY	22	0.0786501
3226	wt	IGHV3-6	ARDRIYYGSTYLYYAM	2	0.00715001
3232	wt	IGHV9-3	AREEGYDGDWFAY	4	0.0143
3234	wt	IGHV1-42	ARHYHYAMDY	5	0.017875
3236	wt	IGHV1-39	ARGYYDAMDY	6	0.02145
3240	wt	IGHV9-3	ARDYPWFA	2	0.00715001
3245	wt	IGHV8-8	ARIASVSPGYFDV	5	0.017875
3249	wt	IGHV1-26	ARRYYDYDKGLYYYAMDY	10	0.03575
3252	wt	IGHV3-6	ARERMDY	55	0.196625
3253	wt	IGHV7-1	ARGGIPYDYDNYWYFDV	11	0.039325
3254	wt	IGHV9-3	ARVYYDYPWFAY	6	0.02145
3255	wt	IGHV5-17	AMDSNRAMDY	2	0.00715001
3256	wt	IGHV6-6	TRGAY	10	0.03575
3259	wt	IGHV6-3	TRNYYGSRDAMDY	53	0.189475
3260	wt	IGHV10-1	VSPYYGSSYNYAMDY	12	0.0429
3261	wt	IGHV8-12	ARRAQYYGSSYNAMDY	22	0.0786501
3268	wt	IGHV8-8	ARMWGVYYYGSWTLYAMDY	21	0.0750751
3270	wt	IGHV1-26	ARRIANWAPYYFD	2	0.00715001
3271	wt	IGHV1-78	ARGGFYGTPYWYFD	2	0.00715001
3274	wt	IGHV7-3	ARGPIYYGNYDAMDY	16	0.0572001
3278	wt	IGHV3-6	AREFGLEMDY	59	0.210925
3281	wt	IGHV3-6	ARDTYYGPGIGYAMDY	21	0.0750751
3282	wt	IGHV1-26	AQITTVEDYAMDY	9	0.032175
3283	wt	IGHV3-6	ARELRYPWYF	9	0.032175
3284	wt	IGHV15-2	ARLYYYGSSPYWYFDV	10	0.03575
3285	wt	IGHV3-6	ARDPNYDYDVRFA	6	0.02145
3286	wt	IGHV1-26	ARSRGYAMDY	7	0.025025
3287	wt	IGHV1-39	LLLLRGYFDV	6	0.02145
3290	wt	IGHV1-19	ARSNLLPHYAMDY	9	0.032175
3291	wt	IGHV1-78	ARWAYGSRGYFDY	24	0.0858001
3292	wt	IGHV7-1	ARDAYSCWYFDV	19	0.0679251
3293	wt	IGHV1-75	VAGDYYAMDY	3	0.010725
3295	wt	IGHV8-8	ARNYYGSSPWYFDV	10	0.03575
3300	wt	IGHV10-3	VRAREATDFDY	10	0.03575
3302	wt	IGHV3-6	AREGDDYDPLMDYYAMDY	33	0.117975
3306	wt	IGHV1-19	ARCEAYYSNYVYAMDY	18	0.0643501
3313	wt	IGHV15-2	ARSGYYYGSFDY	11	0.039325
3315	wt	IGHV8-5	AHLCGYDVRFAY	23	0.0822251
3316	wt	IGHV1-85	ARPLDYMGAMDY	3	0.010725
3317	wt	IGHV9-2	ARRRKSYYSNSYYYAMDY	14	0.0500501
3322	wt	IGHV1-19	ARKIYYDYAWFAY	11	0.039325
3323	wt	IGHV1-82	TNGNYFAY	7	0.025025
3324	wt	IGHV6-3	TGGDYYYGSSPWFAY	12	0.0429
3327	wt	IGHV6-3	TGLGWGY	62	0.22165
3330	wt	IGHV1-26	ARWGTTENYFDY	5	0.017875
3331	wt	IGHV9-3	ARFDYDVRFAY	10	0.03575
3332	wt	IGHV1-9	ARPPGYYGSSSYYFDY	3	0.010725
3335	wt	IGHV3-1	ARGSWYYAMDY	18	0.0643501
3336	wt	IGHV1-26	ARCLYDYDWFAY	7	0.025025
3337	wt	IGHV1-58	ARSLYDYGYYFDY	11	0.039325
3338	wt	IGHV3-6	ARAGGSSPGV	9	0.032175
3339	wt	IGHV3-8	ATTMITTPFAY	17	0.0607751
3340	wt	IGHV1-26	ARGYYYGSPWFAY	4	0.0143
3341	wt	IGHV1-64	ARGDY	4	0.0143
3348	wt	IGHV1-49	ARDTTVGYFDV	2	0.00715001
3349	wt	IGHV1-26	ARLWGLLRYAMDY	6	0.02145
3350	wt	IGHV1-50	ALTTVVHYYAMDY	8	0.0286
3351	wt	IGHV6-3	TDSSGQAY	19	0.0679251
3356	wt	IGHV8-6	ARRARVGDA	2	0.00715001
3358	wt	IGHV3-6	ARDLETYYSNPYYYAMDY	26	0.0929501
3362	wt	IGHV8-8	ARIARDYDAVKFAY	3	0.010725
3365	wt	IGHV10-1	VRHEGPPRRDYAMDY	15	0.0536251
3368	wt	IGHV8-12	ALLRHWYFDV	10	0.03575
3370	wt	IGHV10-1	VKGLRRGFAY	15	0.0536251
3371	wt	IGHV14-3	ARGAYDGYYWFAY	6	0.02145
3372	wt	IGHV6-6	TRWFAY	26	0.0929501
3373	wt	IGHV1-26	ASYDYDGNYYAMDY	11	0.039325
3376	wt	IGHV5-2	ARHGLFAY	2	0.00715001
3379	wt	IGHV4-1	KTGDYYGSSYGLCYGL	4	0.0143
3390	wt	IGHV1-64	AREGSNSPHYYAMDY	5	0.017875
3392	wt	IGHV8-8	ARIARYGSSYYAMDY	19	0.0679251
3394	wt	IGHV1-78	ARSELGGYSFAY	5	0.017875
3403	wt	IGHV6-6	TLLSLIYYYGSSSWYFDV	2	0.00715001
3409	wt	IGHV8-8	ARILLGYYAMDY	15	0.0536251
3412	wt	IGHV8-8	ARIPPTGLFYAMDY	7	0.025025
3413	wt	IGHV1-26	AYYYGSSSFDY	7	0.025025
3416	wt	IGHV13-2	SRSSGYHLDY	5	0.017875
3420	wt	IGHV3-6	ARARYYYGSSYYFDY	23	0.0822251
3423	wt	IGHV1-58	ARSGDGYYPFAY	4	0.0143
3425	wt	IGHV3-6	ARELRYPWY	5	0.017875
3428	wt	IGHV3-6	ASGLDAMD	4	0.0143
3429	wt	IGHV1-19	ARRRDDYDEDYAMDY	10	0.03575
3431	wt	IGHV1-26	ARDYGSSYRFAY	5	0.017875
3432	wt	IGHV9-1	VRSNYEGSMDY	3	0.010725
3433	wt	IGHV3-8	ARWTTGYAMDY	6	0.02145
3435	wt	IGHV9-3	ARSSNYYYGSTFDY	10	0.03575
3436	wt	IGHV1-26	ARSRYSNCDY	4	0.0143
3438	wt	IGHV6-3	TTIYYDYDRVY	43	0.153725
3449	wt	IGHV1-26	ARSHYSNYF	3	0.010725
3455	wt	IGHV8-8	ARIDIYYYGSSHYYAMDY	15	0.0536251
3458	wt	IGHV3-6	AREGVLRSNWYFDV	35	0.125125
3459	wt	IGHV1-52	ARLDDGYYGY	2	0.00715001
3461	wt	IGHV1-26	ADYYGSSYEGAMDY	2	0.00715001
3462	wt	IGHV3-8	ARLLRVYFDY	21	0.0750751
3463	wt	IGHV1-64	ARSAYYSNYSFAY	4	0.0143
3464	wt	IGHV3-1	AREGGGWLLYYAMDY	16	0.0572001
3465	wt	IGHV1-47	AIYPYYYGSSYVPAWFAY	2	0.00715001
3466	wt	IGHV6-3	TDDTTANWYFDV	2	0.00715001
3467	wt	IGHV1-5	TRSYDY	4	0.0143
3468	wt	IGHV3-6	MYYGYDAIPWFA	7	0.025025
3469	wt	IGHV1-5	TRDSMVTAEAMDY	2	0.00715001
3472	wt	IGHV1-76	ARGYSNYVDYAMDY	2	0.00715001
3474	wt	IGHV9-3	AREDYSNLCAMDY	4	0.0143
3478	wt	IGHV8-12	ARGVYGYERDFDY	2	0.00715001
3479	wt	IGHV1-37	ARYHYYAMD	3	0.010725
3484	wt	IGHV1-78	ARSLDYYGSSYDAMDY	11	0.039325
3489	wt	IGHV3-6	AREGDGYFDY	19	0.0679251
3494	wt	IGHV8-8	ARIAEDDGYPFDY	13	0.046475
3495	wt	IGHV1-18	ARSDYYGSRSFAY	2	0.00715001
3496	wt	IGHV8-8	ARIESPLYDGYYPYAMD	2	0.00715001
3497	wt	IGHV8-8	ARIEGVTTGY	2	0.00715001
3501	wt	IGHV1-63	ARSGGDDGYWYFDV	2	0.00715001
3502	wt	IGHV6-6	IYGNCPFAY	4	0.0143
3521	wt	IGHV13-2	SRSAYYSSYAMDY	9	0.032175
3523	wt	IGHV1-9	AKGPPYSNYTVCFDY	6	0.02145
3532	wt	IGHV14-3	ARGGYGNYGE	2	0.00715001
3538	wt	IGHV3-6	ARDKVY	4	0.0143
3539	wt	IGHV3-1	ARHYGSSRGYFDV	3	0.010725
3541	wt	IGHV1-76	AREGGHYYGSRKVWFAY	4	0.0143
3542	wt	IGHV8-6	ARIYGSRVGWYFDV	12	0.0429
3543	wt	IGHV1-19	ARRLFDY	7	0.025025
3551	wt	IGHV5-16	ARGRGSSPFAY	3	0.010725
3554	wt	IGHV6-3	KKIYGYADYYAMDY	37	0.132275
3558	wt	IGHV5-9	ARLGGWLLLDAMDY	3	0.010725
3559	wt	IGHV1-54	ARDGYYGYAMDY	3	0.010725
3560	wt	IGHV3-6	ARDTGTSYAMDY	37	0.132275
3566	wt	IGHV1-18	ARRDYYGTYFDY	5	0.017875
3570	wt	IGHV4-1	ASLGRPSWFAY	7	0.025025
3571	wt	IGHV1-78	AREPFYYAMDY	10	0.03575
3578	wt	IGHV3-6	AREGITTVDFDV	51	0.182325
3581	wt	IGHV8-8	ARMGYYYGSSYVDY	7	0.025025
3583	wt	IGHV5-9-1	TRGFGAMDY	5	0.017875
3589	wt	IGHV1-49	ALNYGSSYWYFDV	2	0.00715001
3593	wt	IGHV1-78	AGGIYDGYYAY	2	0.00715001
3594	wt	IGHV1-26	AVYGSTPAWFAY	2	0.00715001
3597	wt	IGHV3-8	ARSSSGNYFDY	7	0.025025
3599	wt	IGHV1-50	ARGDGSGAWFAY	2	0.00715001
3600	wt	IGHV3-6	ACSFA	2	0.00715001
3603	wt	IGHV6-6	TRRGAAQATFAY	7	0.025025
3604	wt	IGHV1-34	ARGGLAFDY	5	0.017875
3606	wt	IGHV1-26	ARGGKYGRHYYAMDY	8	0.0286
3615	wt	IGHV1-64	ARRDDYPFFAY	5	0.017875
3616	wt	IGHV3-6	ARALDYDEGSYAMDY	16	0.0572001
3617	wt	IGHV5-17	ARRGYYGSSSYAMDY	4	0.0143
3619	wt	IGHV14-1	TKGYYGSSSWFAY	2	0.00715001
3624	wt	IGHV14-3	ARFYDGFFDY	13	0.046475
3626	wt	IGHV10-3	VREGGDYVYDY	6	0.02145
3628	wt	IGHV13-2	SYGYAMDY	16	0.0572001
3632	wt	IGHV1-20	ARDDGYLWY	3	0.010725
3634	wt	IGHV9-3	ARYYSFDY	10	0.03575
3637	wt	IGHV3-6	ARRGPWFA	2	0.00715001
3640	wt	IGHV6-3	TRGPDY	25	0.0893751
3646	wt	IGHV5-12	ARHRKGQLDYYAMDY	2	0.00715001
3647	wt	IGHV1-20	ARDDGYLWYFD	4	0.0143
3649	wt	IGHV1-26	ARNLLLPYYFDY	7	0.025025
3651	wt	IGHV1-78	AKTFPYSNYVAWFAY	6	0.02145
3657	wt	IGHV1-62-2	ARHGPPTVYGSSPYYFDY	6	0.02145
3658	wt	IGHV4-1	AKLYFDV	15	0.0536251
3659	wt	IGHV1-75	ARWGYYGSSYEDY	17	0.0607751
3662	wt	IGHV8-8	ARSMDY	8	0.0286
3663	wt	IGHV6-6	TRSGYGDY	7	0.025025
3664	wt	IGHV8-8	ARIEDYGSSLFDY	10	0.03575
3665	wt	IGHV1-9	ARKRDRAMDY	4	0.0143
3666	wt	IGHV1-26	ARSYDYDERAWFAY	4	0.0143
3672	wt	IGHV1-19	AKRDYERVLFFDY	12	0.0429
3675	wt	IGHV6-3	TGGVWFGMGYSDY	18	0.0643501
3676	wt	IGHV3-6	AERPAQATGFA	5	0.017875
3678	wt	IGHV6-3	TEGGSYAMD	2	0.00715001
3679	wt	IGHV3-6	QHITTVVDYFDY	12	0.0429
3680	wt	IGHV3-6	ARDDGPYYYAMD	4	0.0143
3684	wt	IGHV5-9-1	TREEKYYYGILDY	6	0.02145
3685	wt	IGHV1-63	ARTNYGSSPSYWYFDV	2	0.00715001
3688	wt	IGHV10-1	VRHEYNQFAY	15	0.0536251
3689	wt	IGHV8-6	ARRALITEEYFDV	8	0.0286
3690	wt	IGHV8-12	ARRGEGNLRWYFD	3	0.010725
3691	wt	IGHV9-3	ARSENSPWYFDV	5	0.017875
3697	wt	IGHV4-1	ARRGYYGSSPNWYFDV	6	0.02145
3699	wt	IGHV8-8	ARIGYGNYVLYAMDY	5	0.017875
3701	wt	IGHV1-39	ARRYGSSYEFAY	7	0.025025
3702	wt	IGHV4-1	ATLKSDWYF	2	0.00715001
3705	wt	IGHV1-58	ARSGTYDYSSWFAY	7	0.025025
3706	wt	IGHV1-26	ARRIYMDAM	2	0.00715001
3707	wt	IGHV8-8	ARMDYYYGSYAMDY	10	0.03575
3708	wt	IGHV1-81	ARGKYDYDDYFDY	3	0.010725
3715	wt	IGHV8-8	ARMGSDYFDY	7	0.025025
3716	wt	IGHV3-6	ARRGLLFYAMD	5	0.017875
3717	wt	IGHV9-4	AREGYYGSRSFAY	10	0.03575
3722	wt	IGHV9-3	ARGRTFYYYAMDY	3	0.010725
3723	wt	IGHV1-49	ARASNYEDYYAMDY	13	0.046475
3726	wt	IGHV14-4	TTYGYYVRNAWFAY	4	0.0143
3729	wt	IGHV1-37	ARYHYYAM	3	0.010725
3731	wt	IGHV1-39	ARGTLTLYYFDY	6	0.02145
3732	wt	IGHV7-1	ARDGPYYYGSSYYAMDY	2	0.00715001
3734	wt	IGHV3-6	ARDTYYGPGIGYAMD	3	0.010725
3735	wt	IGHV1-19	ASPIYYDYPWFAY	6	0.02145
3736	wt	IGHV6-6	TRGDYEGYYFDY	8	0.0286
3738	wt	IGHV10-3	VSYYDYETDYAMDY	16	0.0572001
3742	wt	IGHV7-1	ARDAGYYGSSYWY	2	0.00715001
3743	wt	IGHV6-3	TGLLYDGYHYAMDY	24	0.0858001
3744	wt	IGHV2-5	AKKEGAPFGTTGYAMDY	12	0.0429
3746	wt	IGHV1-39	ARSWDPPWYFDV	2	0.00715001
3747	wt	IGHV4-1	ARRYYGSSYWAMDY	16	0.0572001
3749	wt	IGHV1-22	ARSDYSWFAY	4	0.0143
3750	wt	IGHV1-39	ASPLYYGSSYYAMDY	13	0.046475
3754	wt	IGHV5-2	ARLTGTYAMDY	3	0.010725
3756	wt	IGHV5-12-1	ARQSSGYQFYYYAMDY	2	0.00715001
3757	wt	IGHV9-3	ATFAWFAY	11	0.039325
3758	wt	IGHV1-75	ARKRIYYDYDRDSFDY	3	0.010725
3769	wt	IGHV1-49	ARQDYGSSGGLAY	3	0.010725
3770	wt	IGHV1-78	AIYYDYGDAMDY	25	0.0893751
3777	wt	IGHV5-16	ARDSGNYVDAMDY	13	0.046475
3779	wt	IGHV1-19	ARDGSSAWFAY	6	0.02145
3781	wt	IGHV3-6	ARETTVVPYFD	7	0.025025
3785	wt	IGHV14-2	ARGDYDGLCIAMDY	2	0.00715001
3788	wt	IGHV14-1	ARWDYYGSSYY	3	0.010725
3790	wt	IGHV3-6	ASGLHYAMDY	37	0.132275
3791	wt	IGHV11-2	MSLYGSPSYYFDY	5	0.017875
3797	wt	IGHV3-6	AREGGGYYGRAMDY	14	0.0500501
3798	wt	IGHV1-75	ARDYGSLYYAMDY	8	0.0286
3799	wt	IGHV6-3	TVRRGAWFAY	2	0.00715001
3800	wt	IGHV5S24	FLIWGSSHLVLRDGDRHNPAM	3	0.010725
3803	wt	IGHV8-8	ARKTYYDYRGYFDV	8	0.0286
3808	wt	IGHV3-6	ARDYYGSSYLDY	17	0.0607751
3809	wt	IGHV3-6	ARDKVYWDVFDY	15	0.0536251
3810	wt	IGHV9-3	ARRELRYYAMDY	4	0.0143
3813	wt	IGHV1-12	ARDGNSAWFAY	3	0.010725
3818	wt	IGHV2-6	SGPSFAY	2	0.00715001
3819	wt	IGHV4-1	ARPGRKWYYAMDY	8	0.0286
3820	wt	IGHV3-1	ARGDPGAMDY	4	0.0143
3821	wt	IGHV3-6	ARRGPWFAY	14	0.0500501
3823	wt	IGHV8-5	AQIGLHW	2	0.00715001
3824	wt	IGHV3-6	AREGITTVVAGSDY	11	0.039325
3826	wt	IGHV1-5	TRCETPGIYYDYVSFDY	3	0.010725
3827	wt	IGHV1-82	ARKEGKNREFDY	4	0.0143
3831	wt	IGHV6-3	TVYDYDLAWFAY	17	0.0607751
3832	wt	IGHV9-3	ARSGTVVATDY	5	0.017875
3833	wt	IGHV8-12	ARSGSTMVTYWYFDV	7	0.025025
3836	wt	IGHV6-3	TGLITTVVAHYYA	3	0.010725
3838	wt	IGHV1-19	ARGGGFDY	5	0.017875
3841	wt	IGHV1-62-2	ARHEEAYYSNYGGFAY	2	0.00715001
3844	wt	IGHV1-26	ARSFKTSDSSGYDYYAMDY	12	0.0429
3845	wt	IGHV9-2	ARFYDGYFHFDY	12	0.0429
3847	wt	IGHV8-6	ARRARVGDAMD	4	0.0143
3848	wt	IGHV8-8	ARMYYSNYYAMDY	7	0.025025
3854	wt	IGHV3-8	ARWEGPYYYAMDY	11	0.039325
3855	wt	IGHV1-26	ANGNYESLAY	3	0.010725
3860	wt	IGHV7-1	ARDAEDYVGYFDV	6	0.02145
3862	wt	IGHV4-1	ARLGGSSYGDY	8	0.0286
3863	wt	IGHV1-63	ASGGDGYDGGYFDV	3	0.010725
3866	wt	IGHV8-8	ARMSYYDYDEFAY	20	0.0715001
3867	wt	IGHV3-8	ARGGGSSYFDY	4	0.0143
3868	wt	IGHV6-3	TVITTVDDY	20	0.0715001
3869	wt	IGHV7-1	ARDAYSCWYFD	2	0.00715001
3870	wt	IGHV7-1	ARDADYYYGSAMDY	2	0.00715001
3874	wt	IGHV3-6	ARETVYYDYFYYA	2	0.00715001
3875	wt	IGHV1-34	ASVDY	2	0.00715001
3876	wt	IGHV1-50	ARGGVDGYPYYAMDY	4	0.0143
3877	wt	IGHV7-1	ARDSRAGAMDY	19	0.0679251
3884	wt	IGHV5-16	AREGANWDGAMDY	2	0.00715001
3885	wt	IGHV6-6	TRHHRGDYPLYAMDY	10	0.03575
3886	wt	IGHV1-26	ARWHYGSSYGYYAMDY	7	0.025025
3888	wt	IGHV4-1	AREGYAMDY	12	0.0429
3889	wt	IGHV8-8	ARIGDYSNGGNYAMDY	4	0.0143
3890	wt	IGHV8-8	ARIMIRWEFDY	5	0.017875
3893	wt	IGHV1-26	ARDQYYYGSSYPFAY	5	0.017875
3894	wt	IGHV1-20	ARGHYYGGYFDV	2	0.00715001
3899	wt	IGHV8-12	ARRALMRYYGGYYYAMDY	11	0.039325
3900	wt	IGHV8-8	ARIYGTWNFGV	3	0.010725
3903	wt	IGHV7-3	ARSDTTNYFDY	11	0.039325
3910	wt	IGHV8-8	ANVPYYYGSSPWDY	15	0.0536251
3911	wt	IGHV1-26	ARSLSLVAKAY	4	0.0143
3914	wt	IGHV1-42	ARSELRYYYFDY	6	0.02145
3915	wt	IGHV9-1	VRRGRLHGSSYEKYYFDY	3	0.010725
3917	wt	IGHV1-12	ARPLLLRYHWYFDV	4	0.0143
3918	wt	IGHV6-3	PYYSTSDWYFDV	12	0.0429
3920	wt	IGHV1-26	ARNYYGSRYYFDY	5	0.017875
3928	wt	IGHV1-53	ARDGNLDY	4	0.0143
3932	wt	IGHV1-19	ASSSHWYFDV	4	0.0143
3934	wt	IGHV1-26	ARGGLRLLYFDY	2	0.00715001
3936	wt	IGHV1-39	AWGSSPLDY	2	0.00715001
3940	wt	IGHV3-6	ARAGSSGYNYAMDY	7	0.025025
3943	wt	IGHV3-6	ARAPLRGYFDV	11	0.039325
3945	wt	IGHV2-9-1	ARIWDFDV	3	0.010725
3948	wt	IGHV1-26	ARGNYYGYYYAMDY	12	0.0429
3951	wt	IGHV1-42	ARSYYGSRGNYAMDY	4	0.0143
3953	wt	IGHV8-8	ARIGIYYDYDVPWYFDV	5	0.017875
3954	wt	IGHV5-16	ARAPIYYDYDEGGYYFDY	11	0.039325
3955	wt	IGHV6-6	TRNYGSSYWYF	3	0.010725
3958	wt	IGHV9-3	ARDYDYDGTYAMDY	6	0.02145
3963	wt	IGHV1-78	ARDDGYYGGFAY	4	0.0143
3964	wt	IGHV9-2	ARSGFFDY	8	0.0286
3965	wt	IGHV10-3	VRDNTTVEGGAWFAY	5	0.017875
3968	wt	IGHV1-78	ARGGFYGTPYWYF	3	0.010725
3970	wt	IGHV9-1	VPITTVVPMDY	6	0.02145
3976	wt	IGHV4-1	AKLYF	3	0.010725
3980	wt	IGHV1-5	TNLIYYYGSSYGFAY	5	0.017875
3981	wt	IGHV15-2	ARDDYDEGFAY	7	0.025025
3984	wt	IGHV10-3	VRDRGYYPYYYAMDY	14	0.0500501
3986	wt	IGHV7-3	ARSGSSYECYAMDY	3	0.010725
3990	wt	IGHV6-3	TGHYYGSSYEDY	18	0.0643501
3991	wt	IGHV1-26	ARDSSGSYFDY	6	0.02145
3992	wt	IGHV13-2	SRSDDLDY	9	0.032175
3993	wt	IGHV8-2	WREEGFV	6	0.02145
3995	wt	IGHV8-11	ARTLYDYDKGVAY	4	0.0143
3996	wt	IGHV1S136	DVLIRLALISQRPKSKYTMD	2	0.00715001
3999	wt	IGHV1-26	AREGGTPYYYAMD	3	0.010725
4002	wt	IGHV1-26	ARFYYYGSSYSFDY	4	0.0143
4003	wt	IGHV1-76	ARYYYYAMDY	13	0.046475
4004	wt	IGHV6-3	TGPGTGAMDY	19	0.0679251
4009	wt	IGHV5-17	ARGGHYYSNYAY	3	0.010725
4011	wt	IGHV3-6	ARAPLYYYGTGYYAM	3	0.010725
4012	wt	IGHV3-6	ARGIIHTRGYFDY	11	0.039325
4015	wt	IGHV3-6	ASDERGFA	7	0.025025
4018	wt	IGHV1-53	ARRGYYDYDDYAMDY	5	0.017875
4021	wt	IGHV3-6	ARDPYYYAMD	3	0.010725
4023	wt	IGHV10-3	VLYGSSLYAMDY	10	0.03575
4026	wt	IGHV6-3	TGLRPSYWY	2	0.00715001
4027	wt	IGHV1-75	ARETGWLRYFDV	2	0.00715001
4028	wt	IGHV1-85	ARSMGLRPYYAMDY	2	0.00715001
4032	wt	IGHV1-19	ATDDGSYYFDY	5	0.017875
4033	wt	IGHV3-5	SSSCH	2	0.00715001
4034	wt	IGHV5-12-1	ARHIVYGEGYFDY	2	0.00715001
4035	wt	IGHV10-3	VRDPGAY	8	0.0286
4046	wt	IGHV1-26	ARTTVVGGGWDFDY	2	0.00715001
4048	wt	IGHV5-16	ARDQGGISYAMDY	17	0.0607751
4050	wt	IGHV2-2	ARNFIWDDGDFDY	6	0.02145
4054	wt	IGHV13-2	SRSSDPLYYFDY	16	0.0572001
4057	wt	IGHV1-81	ASGEAWFAY	2	0.00715001
4065	wt	IGHV3-6	ARVNWDWYFDV	2	0.00715001
4067	wt	IGHV7-3	ARWGDYEKDAMDY	10	0.03575
4072	wt	IGHV1-78	ARESIYYYGSSYFDY	16	0.0572001
4075	wt	IGHV9-4	ARFDYEDAMD	2	0.00715001
4076	wt	IGHV3-6	AIITTVVANWYFD	3	0.010725
4082	wt	IGHV1-82	ARGDYYYGSYAMDY	3	0.010725
4087	wt	IGHV4-1	ARLQKPYAMDY	3	0.010725
4093	wt	IGHV10-3	VRESTTVPSWFAY	6	0.02145
4094	wt	IGHV8-12	ARSLLRYPYAMDY	2	0.00715001
4097	wt	IGHV1-64	ASKGFAY	2	0.00715001
4099	wt	IGHV5-4	ARDHPTWAMDY	6	0.02145
4100	wt	IGHV8-8	ARIALFYGSSGGDYF	2	0.00715001
4102	wt	IGHV3-1	ARDYDYDSAWF	2	0.00715001
4103	wt	IGHV1-54	ARGDYVLYYFDY	9	0.032175
4104	wt	IGHV1-19	ARTSPPIYHYAMDY	2	0.00715001
4105	wt	IGHV8-8	ARIENYSNLFAY	5	0.017875
4107	wt	IGHV1-72	ATEGIITTVVPYYYAMDY	7	0.025025
4110	wt	IGHV9-3	ARWATVVAEGWFAY	7	0.025025
4112	wt	IGHV1-64	ARSGGWLPYFDY	5	0.017875
4114	wt	IGHV1-20	ASSGPITTVVGFDY	12	0.0429
4115	wt	IGHV3-8	ARLSLYDYEYYAMDY	15	0.0536251
4117	wt	IGHV6-3	TGPLGGGRYYYAMDY	27	0.0965251
4120	wt	IGHV1-39	ARDDYGSSYVGYFDV	4	0.0143
4124	wt	IGHV1-18	ARWNISPYYYGSSYHWYFDV	4	0.0143
4125	wt	IGHV2-6-1	ARQQITTVVPYYAMDY	2	0.00715001
4131	wt	IGHV1-72	ARRGYYYGRGAMDY	3	0.010725
4132	wt	IGHV2-2	AREEDYYYGSSFDY	6	0.02145
4137	wt	IGHV8-8	ARIGNSDYFDY	14	0.0500501
4141	wt	IGHV5-4	ARDGAYGNYVLAY	5	0.017875
4143	wt	IGHV8-11	ARISPPYYGSSYWYFDV	5	0.017875
4148	wt	IGHV8-12	ARDYGSSLYYYAMDY	7	0.025025
4149	wt	IGHV1-26	ARDYEAWFAY	5	0.017875
4150	wt	IGHV15-2	AYYSNYHYAMDY	2	0.00715001
4151	wt	IGHV3-6	ARGYGRVPYWY	2	0.00715001
4153	wt	IGHV1-26	ARREAYYSNYGFAY	9	0.032175
4156	wt	IGHV3-8	AKYAIYF	2	0.00715001
4157	wt	IGHV3-6	ARDVLLWAMD	4	0.0143
4159	wt	IGHV7-1	ARDAPYYAMD	2	0.00715001
4164	wt	IGHV1-19	APHLGPYYYGSSYYAMDY	6	0.02145
4165	wt	IGHV8-11	ARMDYYYGSRD	7	0.025025
4169	wt	IGHV8-12	AYPDDYGAWFAY	3	0.010725
4170	wt	IGHV1-20	ARRYFDV	9	0.032175
4180	wt	IGHV10-3	VRGGSRGDY	17	0.0607751
4186	wt	IGHV1-26	ARSAQATKAWFAY	3	0.010725
4190	wt	IGHV13-2	SRSGDYAMDY	4	0.0143
4194	wt	IGHV6-6	KVSTTVDAMDY	7	0.025025
4197	wt	IGHV9-1	VRWEPPFAY	3	0.010725
4198	wt	IGHV3-6	ARDRGYDGQTGGDAMD	4	0.0143
4200	wt	IGHV9-1	VKEAFTTVVATLWYFDV	6	0.02145
4205	wt	IGHV9-3	ALLRLDY	10	0.03575
4206	wt	IGHV1-69	ARGIHYYGSSLYYFDY	4	0.0143
4207	wt	IGHV1-76	AREKGLNYDYDLYYAMDY	8	0.0286
4210	wt	IGHV1-7	AREGLTAWFAY	2	0.00715001
4211	wt	IGHV8-8	ARISITTVVAPDY	18	0.0643501
4212	wt	IGHV9-3	ARGIYGNSPF	5	0.017875
4213	wt	IGHV9-3	ARPPFYYGSSYGYFDV	2	0.00715001
4214	wt	IGHV14-4	TTEGIYYGNRFAY	3	0.010725
4218	wt	IGHV1-75	ARIYYYGSSHWYFDV	2	0.00715001
4220	wt	IGHV5-16	ARERGYYGSSSYYFDY	19	0.0679251
4223	wt	IGHV9-1	VRWSPLLLGYFDV	4	0.0143
4224	wt	IGHV9-3	ARREPQRAMDY	4	0.0143
4232	wt	IGHV1-75	ARRYYYGSSPYYYAMDY	5	0.017875
4234	wt	IGHV4-1	ATLKSDWYFDV	7	0.025025
4240	wt	IGHV3-6	ARGRVTTKVSYYYAMDY	2	0.00715001
4247	wt	IGHV3-4	ARGLFYYYGSSPYYA	2	0.00715001
4248	wt	IGHV8-8	ARIEGYSNPHYYAMDY	6	0.02145
4251	wt	IGHV14-4	TTYDSPLFAY	2	0.00715001
4253	wt	IGHV6-6	TRSTMVTTGFAY	5	0.017875
4255	wt	IGHV2-6	ASGGAMDY	4	0.0143
4256	wt	IGHV5-16	ARDAGLRRGYYF	2	0.00715001
4259	wt	IGHV1-47	ARRGYDGYPHYYAMDY	3	0.010725
4260	wt	IGHV9-3	ARVDYGYDEYYFDY	4	0.0143
4264	wt	IGHV1-81	ARSYITTVPLYAMDY	2	0.00715001
4266	wt	IGHV1-15	ILFYGNYAIDYAMDY	2	0.00715001
4267	wt	IGHV1-19	ARNYYYYGSSYAMDY	4	0.0143
4268	wt	IGHV4-1	ARDYYGSSYWYFDV	9	0.032175
4273	wt	IGHV1-75	ARPSLYDGYYEDYAMDY	4	0.0143
4274	wt	IGHV6-3	TVYYYGSSGY	16	0.0572001
4275	wt	IGHV6-3	IPVYYYGSSYDYYAM	2	0.00715001
4276	wt	IGHV10-1	VRHHNWDYFDY	9	0.032175
4282	wt	IGHV10-1	VRHHTAIYYDYEDAMDY	18	0.0643501
4285	wt	IGHV9-1	VRLYYGFAY	7	0.025025
4287	wt	IGHV3-5	ARDDDGYSFAY	16	0.0572001
4288	wt	IGHV9-3	ARWNPQSRAMDY	3	0.010725
4289	wt	IGHV3-6	ASGAYGSSPYWYFDV	12	0.0429
4290	wt	IGHV1-12	ARPLITTVVGCFDY	2	0.00715001
4295	wt	IGHV1-19	ARNDGAWFAY	5	0.017875
4299	wt	IGHV1-75	ARSGIYYDLFDY	7	0.025025
4307	wt	IGHV6-3	TDPYSY	9	0.032175
4311	wt	IGHV8-12	ARRALYGNYYAMDY	5	0.017875
4313	wt	IGHV1-77	ASDGSYYFDY	2	0.00715001
4321	wt	IGHV9-4	ARGPVGVVPLDY	2	0.00715001
4326	wt	IGHV1-26	ARRRVYYDYPPMDY	3	0.010725
4327	wt	IGHV1-26	ARERNLGDIYYGNSFDY	3	0.010725
4328	wt	IGHV7-3	ARYRGLGYFDV	9	0.032175
4332	wt	IGHV1-55	ARGGYDYSYAMDY	2	0.00715001
4336	wt	IGHV6-3	TGGYYYGSSPSYWYFDV	15	0.0536251
4339	wt	IGHV5-16	ARHPYYGSSSYAMDY	2	0.00715001
4341	wt	IGHV1-19	ASYSNYYGCYAMDY	7	0.025025
4345	wt	IGHV1-75	ARSPYYYGSSYLHFDY	3	0.010725
4348	wt	IGHV9-1	VRNYYDYGEWANEGFDY	10	0.03575
4349	wt	IGHV1-59	AKGYDGFAY	4	0.0143
4354	wt	IGHV1-26	ARKLRPYFDY	2	0.00715001
4357	wt	IGHV4-1	ASVYYYGSSYGNAMDY	10	0.03575
4363	wt	IGHV6-3	TGGGYYYGSNWYFD	4	0.0143
4364	wt	IGHV8-12	ARRATVAHYAMDY	12	0.0429
4367	wt	IGHV2-2	TTVVARGYYAMDY	5	0.017875
4368	wt	IGHV1-66	ARDYDGYYGFAY	3	0.010725
4377	wt	IGHV1-81	ARLYGNYADYYAMDY	5	0.017875
4378	wt	IGHV3-6	ARDYGSRYFD	3	0.010725
4381	wt	IGHV1-18	ARLEWGTAWFAY	2	0.00715001
4387	wt	IGHV1-47	ARGEGAMDY	9	0.032175
4388	wt	IGHV1-26	ARRVYSGNPEGFAY	6	0.02145
4389	wt	IGHV1-12	ARGPVYYDYEYFDY	6	0.02145
4391	wt	IGHV9-3	ARSPLYYYGSSSGYWYFDV	4	0.0143
4394	wt	IGHV3-1	ARYDGYLAFSFDY	15	0.0536251
4396	wt	IGHV13-2	SSDYTGGFAY	9	0.032175
4402	wt	IGHV6-3	RITTVVATTTLTT	2	0.00715001
4403	wt	IGHV1-26	ALLWYFDV	2	0.00715001
4404	wt	IGHV2-9-1	ARRDSSYAMDY	7	0.025025
4405	wt	IGHV1-5	TREAMDY	2	0.00715001
4409	wt	IGHV8-5	AQIYYYGSIFA	3	0.010725
4411	wt	IGHV1-26	ARSHYSNYFAY	15	0.0536251
4412	wt	IGHV1-78	ARWDYDMDYA	2	0.00715001
4416	wt	IGHV7-3	ARYGYDEGYAMDY	12	0.0429
4425	wt	IGHV1-55	AREPDINGRAWFAY	2	0.00715001
4426	wt	IGHV5-17	ASPYYYGSSYVLWYFDV	2	0.00715001
4427	wt	IGHV1-9	ARKFDYYGSSYAMDY	6	0.02145
4428	wt	IGHV8-8	ARISLITTVVVPFDY	11	0.039325
4431	wt	IGHV1-39	ASSGAMDY	6	0.02145
4441	wt	IGHV1-26	ARHSSGYHYYAMDY	8	0.0286
4445	wt	IGHV1-75	AGDYDGYFDV	4	0.0143
4449	wt	IGHV1-75	ARDWDSYFD	2	0.00715001
4456	wt	IGHV3-6	ARVGGFA	8	0.0286
4460	wt	IGHV8-8	AKTYTYGSHWYFDV	3	0.010725
4463	wt	IGHV1-47	ARGHYYGYAMDY	9	0.032175
4468	wt	IGHV9-3	ARIHYYGSSYDYAMDY	3	0.010725
4471	wt	IGHV1-20	ARWGSNYGVFYAMDY	5	0.017875
4475	wt	IGHV1-26	ARRDYRYHYYAMDY	3	0.010725
4476	wt	IGHV1-75	ARYGSSYLWYFDV	3	0.010725
4477	wt	IGHV8-8	ARIEPLYYYGSSFAWFA	2	0.00715001
4478	wt	IGHV3-6	ARGYYGSIPYFD	2	0.00715001
4481	wt	IGHV5-12-2	ARQCWLLDYFDY	7	0.025025
4490	wt	IGHV1-19	ARLYYDYDVAWFAY	5	0.017875
4495	wt	IGHV10-1	VRQGDY	5	0.017875
4496	wt	IGHV3-6	ATYYYGSSPAWF	2	0.00715001
4497	wt	IGHV15-2	ARLLNGGYYA	4	0.0143
4498	wt	IGHV5-12	ARHNYSNYFYAMDY	5	0.017875
4499	wt	IGHV3-1	ARGGLLEAWFAY	13	0.046475
4500	wt	IGHV3-6	ARTYDYDVWFA	5	0.017875
4502	wt	IGHV9-3	ARSGYSYYYAMDY	4	0.0143
4504	wt	IGHV8-2	WREMRLRRTFDY	18	0.0643501
4506	wt	IGHV6-6	TRPLTGRAWFAY	8	0.0286
4507	wt	IGHV6-3	TAGYAWFA	4	0.0143
4511	wt	IGHV8-12	ARKIYYDYDRYAMDY	10	0.03575
4513	wt	IGHV1-39	ARRYYSNRGYFDY	5	0.017875
4519	wt	IGHV7-1	ARSGPNLYAMDY	7	0.025025
4527	wt	IGHV1-54	ARSRYTVYAMDY	3	0.010725
4531	wt	IGHV1-14	TRPYYYGSSPYYFDY	2	0.00715001
4533	wt	IGHV8-8	ARIEELRQFAY	6	0.02145
4537	wt	IGHV5-9-1	TRDGDITTKAMDY	9	0.032175
4539	wt	IGHV1-26	ARGDYYGSSYLSMDY	2	0.00715001
4547	wt	IGHV1-75	ARSALLRYHDY	6	0.02145
4548	wt	IGHV3-6	ARSLRQGYFD	2	0.00715001
4553	wt	IGHV1-62-2	ARHEEEAYYSNSAWFAY	7	0.025025
4554	wt	IGHV1-61	ARSLRSPFAY	2	0.00715001
4557	wt	IGHV6-6	TITTVVGGDY	10	0.03575
4559	wt	IGHV9-3	ARDGYYPDWYFDV	4	0.0143
4562	wt	IGHV8-8	ARIYDGYYAGAMDY	7	0.025025
4563	wt	IGHV1-47	ARGYYYGSSWYFDV	6	0.02145
4573	wt	IGHV1-26	ARYNGSRYFDY	3	0.010725
4579	wt	IGHV1-62-3	ARGFYGNRGRYFDV	3	0.010725
4585	wt	IGHV11-2	IGSSSYYYAMDY	5	0.017875
4590	wt	IGHV5-6	ARHPNYGSSYWFAY	3	0.010725
4591	wt	IGHV1-81	AREGYSNYEWYYAMDY	4	0.0143
4597	wt	IGHV1-75	ARDSYYAMDY	9	0.032175
4598	wt	IGHV10-1	VSHSSGNYYA	2	0.00715001
4599	wt	IGHV1-26	AREGDLPPYNS	4	0.0143
4600	wt	IGHV1-26	ARYYSNFDY	3	0.010725
4607	wt	IGHV3-8	ARGTYSNFLFAY	8	0.0286
4608	wt	IGHV1-18	ARGDYYGPFAY	2	0.00715001
4614	wt	IGHV9-3	AREGGYYYGSSSYYY	2	0.00715001
4615	wt	IGHV1-22	ASPYDYLAY	2	0.00715001
4616	wt	IGHV6-6	TSLLRYAWFAY	4	0.0143
4619	wt	IGHV9-3	ARKIYYGSSYWYFDV	13	0.046475
4629	wt	IGHV1-18	ARKGLYRGFAY	2	0.00715001
4630	wt	IGHV1-75	ARGGAYGNYEGY	3	0.010725
4641	wt	IGHV1-9	ARGDYDRAWFAY	3	0.010725
4644	wt	IGHV3-8	ARYKFYDGYYFDY	18	0.0643501
4649	wt	IGHV1-19	ARGRTGPWFAY	2	0.00715001
4657	wt	IGHV3-6	ARGGDLYYDYDKAY	5	0.017875
4658	wt	IGHV6-3	TGLYYGNYYF	7	0.025025
4659	wt	IGHV1-9	ARRYYGSSYWFAY	5	0.017875
4661	wt	IGHV1-62-2	ARHQERYYYGSSPFDY	5	0.017875
4663	wt	IGHV3-1	ARGLWDWYFDV	4	0.0143
4667	wt	IGHV6-6	IRLRRIAMDY	17	0.0607751
4671	wt	IGHV13-2	SSDGNYSFAY	16	0.0572001
4675	wt	IGHV5-2	ARHYSNYLYYYAMDY	6	0.02145
4677	wt	IGHV8-8	ARIEITTVNYYAM	2	0.00715001
4684	wt	IGHV10-3	VRGPGVVYYYAMDY	12	0.0429
4687	wt	IGHV8-12	ARRGGVYYYGSRGYFDV	3	0.010725
4688	wt	IGHV9-3	AREGYSNYEVYFD	3	0.010725
4690	wt	IGHV8-8	ARIRVYYDYFDY	12	0.0429
4692	wt	IGHV1-19	ARSGSSYWYFDV	8	0.0286
4693	wt	IGHV1-26	ASGGLLQFAY	2	0.00715001
4698	wt	IGHV1-39	AGYDYDGFYAMDY	4	0.0143
4702	wt	IGHV1-76	AREGGYDYDWFAY	5	0.017875
4705	wt	IGHV3-6	ARDPIYYYGSSYWYFD	6	0.02145
4709	wt	IGHV1-26	ASPLLLPPMDY	6	0.02145
4712	wt	IGHV10-3	VRGGGYYYGSSPHYYAMDY	2	0.00715001
4719	wt	IGHV1-72	ARLLPYYYAMDY	5	0.017875
4722	wt	IGHV5-15	ARQRYYGSSPYYYAMDY	3	0.010725
4726	wt	IGHV2-2	ARNGDYDVAMDY	2	0.00715001
4728	wt	IGHV8-8	ARIDIYYYGSSHYYAM	2	0.00715001
4733	wt	IGHV9-3	ARRAAQATPWFAY	4	0.0143
4734	wt	IGHV8-8	ARSYSNYGGAMDY	15	0.0536251
4737	wt	IGHV1-4	ARSPSFYSFYYAMDY	2	0.00715001
4739	wt	IGHV8-8	ARIGWLYGSSYRYFDV	7	0.025025
4746	wt	IGHV5-16	ARVYGSILDY	6	0.02145
4751	wt	IGHV1-75	AREDGSSSLDY	2	0.00715001
4754	wt	IGHV6-3	TGPLSYGSSDYAMD	4	0.0143
4755	wt	IGHV9-3	ARGPYYYGSGGAMDY	7	0.025025
4757	wt	IGHV3-6	ARDQEGLLAWFA	8	0.0286
4758	wt	IGHV1-18	ARGIYYGSSWYFDV	2	0.00715001
4760	wt	IGHV9-4	ARGGLLYAMDY	15	0.0536251
4761	wt	IGHV1-81	ARDCPIYYYGSSYWYFDV	5	0.017875
4764	wt	IGHV1-12	ASEEDYYGSSSFAY	10	0.03575
4765	wt	IGHV4-1	ARQAPNYYGSSPWYFDV	5	0.017875
4767	wt	IGHV1-26	ALMVTTANYAMDY	3	0.010725
4774	wt	IGHV3-6	ARDRFLIYYYGSSPSYWYF	4	0.0143
4776	wt	IGHV14-4	TTKASYGNGWYFDV	2	0.00715001
4778	wt	IGHV3-5	ARENGYYDWYFD	3	0.010725
4780	wt	IGHV1-76	AREGHDGYYENDY	3	0.010725
4783	wt	IGHV1-62-2	ARHEEGPRQLRLKGAWFAY	3	0.010725
4787	wt	IGHV3-8	ARLLRVYF	2	0.00715001
4792	wt	IGHV4-1	ARQKYYGSSSWFAY	6	0.02145
4793	wt	IGHV1-34	AITTVVARYFDV	5	0.017875
4801	wt	IGHV1-19	ARGIRPFYYYGSSYGYFDY	5	0.017875
4808	wt	IGHV5-9	ARHSLDYSVHY	2	0.00715001
4809	wt	IGHV8-8	ARMRGSSYGY	4	0.0143
4810	wt	IGHV1-78	ARWDYGKRGAMD	3	0.010725
4811	wt	IGHV14-3	AREVGNSNLAY	3	0.010725
4812	wt	IGHV1-74	AIRFAY	3	0.010725
4813	wt	IGHV5-17	AREVGSLLLTMDY	2	0.00715001
4816	wt	IGHV3-1	ARAGDGYFLDY	7	0.025025
4818	wt	IGHV3-6	ARDGYDVSVFAY	34	0.12155
4820	wt	IGHV1-78	ARRIGLLRRYF	2	0.00715001
4826	wt	IGHV1-26	ARAEGSYAMDY	3	0.010725
4835	wt	IGHV1-19	ASDYGSSLFDY	7	0.025025
4836	wt	IGHV14-2	ARNYYGSSCYYFDY	2	0.00715001
4837	wt	IGHV1-34	AKGGNYDYYAMDY	4	0.0143
4846	wt	IGHV5-16	ARDAGLRRGYYFD	2	0.00715001
4848	wt	IGHV8-12	ARRVGYYGSGDWYFDV	4	0.0143
4852	wt	IGHV3-6	ARSLRQGYF	3	0.010725
4861	wt	IGHV1-87	SEDSAVYYCAYSYDYFDY	5	0.017875
4862	wt	IGHV1-78	ARSRAMDY	15	0.0536251
4863	wt	IGHV8-8	ARSYYGSSPRFAY	3	0.010725
4865	wt	IGHV2-3	AKENWDIAMDY	4	0.0143
4874	wt	IGHV3-6	ARDDGPYYYA	3	0.010725
4875	wt	IGHV1-26	ARDYNYGSSSPMDY	3	0.010725
4878	wt	IGHV1-49	ARGGVYYSKYAMDY	5	0.017875
4882	wt	IGHV1-78	ARRHGYYEDYAMD	3	0.010725
4885	wt	IGHV1-26	ARDYGSSYWFAY	8	0.0286
4889	wt	IGHV5-4	ARDYSKPFYAMDY	4	0.0143
4890	wt	IGHV3-6	ARELRYPWYFD	7	0.025025
4891	wt	IGHV6-3	TTGTGAY	35	0.125125
4900	wt	IGHV3-6	ARRYMDY	7	0.025025
4905	wt	IGHV6-3	TGDYDYFYYFD	2	0.00715001
4906	wt	IGHV9-3	ARDYPWFAY	9	0.032175
4912	wt	IGHV10-1	VRHAPAMDY	8	0.0286
4915	wt	IGHV10-1	VRHRYYGSRGGAMDY	10	0.03575
4917	wt	IGHV2-2	ARLLFDY	3	0.010725
4921	wt	IGHV3-6	ARGAYYGNYEAWF	2	0.00715001
4922	wt	IGHV7-1	ARDAYDYDDGAWFAY	7	0.025025
4924	wt	IGHV3-6	ARDGGYGAMDY	23	0.0822251
4925	wt	IGHV2-3	AKDYYDYDGAMDY	12	0.0429
4927	wt	IGHV9-3	ARPENLWSPFAY	7	0.025025
4930	wt	IGHV10-3	VREGSGSSPAWFAY	2	0.00715001
4934	wt	IGHV1-50	ARLYYYA	2	0.00715001
4935	wt	IGHV5-17	ASLWLREDY	2	0.00715001
4938	wt	IGHV3-6	AREMAADYYGSSYEDYFD	4	0.0143
4941	wt	IGHV5-16	ARAGDIYGYDGGVDFDY	12	0.0429
4946	wt	IGHV1-78	ARIYYDYAM	3	0.010725
4947	wt	IGHV3-8	ASSLYGSSPNWYF	2	0.00715001
4950	wt	IGHV8-6	ARRARVGDAM	4	0.0143
4951	wt	IGHV1-75	ARTDYDFSYAMDY	3	0.010725
4956	wt	IGHV7-3	ARYRGGSSPYAMDY	8	0.0286
4957	wt	IGHV1-78	ARRHGYYEDYAMDY	26	0.0929501
4958	wt	IGHV3-6	ARDRFLIYYYGSSPSYWY	3	0.010725
4959	wt	IGHV1-18	ARNYYGSSHYFDY	4	0.0143
4960	wt	IGHV1-4	ASSLSTYYAMDY	2	0.00715001
4967	wt	IGHV3-5	ARDSYYGSSWGWFDY	7	0.025025
4971	wt	IGHV3-6	AREGFG	12	0.0429
4972	wt	IGHV1-26	ARDYDYDGAGPFYYAMDY	5	0.017875
4974	wt	IGHV1-20	ARDDGYLWYFDV	20	0.0715001
4975	wt	IGHV1-18	AREDYDYDPFAY	3	0.010725
4976	wt	IGHV10-3	VRSTTVVANGYAMDY	10	0.03575
4977	wt	IGHV2-5	ARGWDYYGSSYRYAMD	2	0.00715001
4978	wt	IGHV9-3	ATFAW	2	0.00715001
4979	wt	IGHV1-18	ASKGIYGDWYFDV	3	0.010725
4980	wt	IGHV1-18	AVTAFDYDYDWVAMDY	2	0.00715001
4981	wt	IGHV1-26	ARLITTVEFDY	7	0.025025
4988	wt	IGHV1-26	ASFIYYGNYYAMD	2	0.00715001
4989	wt	IGHV1-9	ARSSLYGNYDYFDY	6	0.02145
4993	wt	IGHV3-6	ASGLDA	5	0.017875
4994	wt	IGHV1-50	ARSNYYGPAWFAY	2	0.00715001
4998	wt	IGHV6-6	TSYYDYGDYAMDY	3	0.010725
5007	wt	IGHV7-1	ARDADSRYFDV	5	0.017875
5010	wt	IGHV1-18	ARCGAMDY	2	0.00715001
5014	wt	IGHV10-1	VRHRSMDY	4	0.0143
5015	wt	IGHV6-3	RTYDYDAY	6	0.02145
5018	wt	IGHV3-1	ARDNGLLYYGSIYWYFD	2	0.00715001
5030	wt	IGHV1-4	AETIYGSSYSAWFAY	2	0.00715001
5031	wt	IGHV14-4	TTGGYDYAMDY	3	0.010725
5033	wt	IGHV3-6	ARDVLLWAM	3	0.010725
5037	wt	IGHV2-5	ARGWDYYGSSYRYAMDY	10	0.03575
5038	wt	IGHV9-3	ARRVFITTVVASRGYFDV	4	0.0143
5044	wt	IGHV1-59	ARRGEYFDY	2	0.00715001
5048	wt	IGHV1-36	ARRGIYYDFDY	2	0.00715001
5054	wt	IGHV1-53	ARERIYYDYLYAMDY	3	0.010725
5059	wt	IGHV8-8	ARGVVDWYFDV	6	0.02145
5064	wt	IGHV1-80	ARSNLGTTVVPNFDY	5	0.017875
5067	wt	IGHV3-6	ASGGYWYFD	4	0.0143
5072	wt	IGHV1-26	AREDPTVPDY	3	0.010725
5073	wt	IGHV9-4	AGGKNSNPWYFDV	6	0.02145
5074	wt	IGHV1-18	ARILYAMDY	5	0.017875
5075	wt	IGHV3-6	ASDYYGRYVDV	2	0.00715001
5081	wt	IGHV14-3	ARPGYYGSSYLHAMDY	2	0.00715001
5086	wt	IGHV6-3	TEDYGTWFA	3	0.010725
5090	wt	IGHV1-75	ARSGDLYGFAY	3	0.010725
5091	wt	IGHV3-6	ARDPIYYYGSSYW	3	0.010725
5098	wt	IGHV8-8	ARKPITTVVKNYFD	2	0.00715001
5100	wt	IGHV1-7	ARHYLRYYAM	2	0.00715001
5101	wt	IGHV6-3	TGGDLYW	3	0.010725
5107	wt	IGHV1-47	ARNGNPSFDY	19	0.0679251
5116	wt	IGHV5-4	ARPYYYGSTMDY	3	0.010725
5118	wt	IGHV2-4	AKNGNYFDY	3	0.010725
5124	wt	IGHV3-6	AREGAMVTTEYFD	3	0.010725
5127	wt	IGHV7-1	ARDAYSCWYF	3	0.010725
5128	wt	IGHV1-26	ARGGVIYYDYNYAMDY	20	0.0715001
5130	wt	IGHV1-75	ARSWDGYYNYYAMDY	3	0.010725
5131	wt	IGHV1-18	ARYDDYDRGSYWYFDV	3	0.010725
5135	wt	IGHV1-9	ANPYYGRDYAMDY	10	0.03575
5136	wt	IGHV1-18	ARSGETFGWFAY	2	0.00715001
5139	wt	IGHV5-16	ARGLAPSYYGSSYWYFDV	5	0.017875
5141	wt	IGHV8-8	ARIDGYDYDFDY	5	0.017875
5145	wt	IGHV1-19	ARGGRLRRFGV	2	0.00715001
5146	wt	IGHV1-26	ARERWLLRRHYYAMDY	7	0.025025
5147	wt	IGHV14-4	TTGWLLRRGAMDY	2	0.00715001
5157	wt	IGHV2-5	AKNSDYGSSYEDFDV	4	0.0143
5160	wt	IGHV1-26	ARSGYGNLDY	4	0.0143
5161	wt	IGHV13-2	SRYHDYDGAMDY	8	0.0286
5163	wt	IGHV8-12	ARRAGVLRFDY	11	0.039325
5164	wt	IGHV1-62-2	ARIEPPFGTVVATNAMDY	6	0.02145
5166	wt	IGHV9-3	AKGVHYYGSRSWFAY	2	0.00715001
5168	wt	IGHV8-8	ARKRDYGSSYDA	2	0.00715001
5175	wt	IGHV6-3	TGNYYGSSLDY	5	0.017875
5184	wt	IGHV1-50	AREGGLYDYALFAY	2	0.00715001
5185	wt	IGHV1-26	ARYYYDYSWF	2	0.00715001
5186	wt	IGHV15-2	AYYSNYVWFAY	4	0.0143
5187	wt	IGHV9-3	ARHYGSSYWFAY	5	0.017875
5189	wt	IGHV1-49	ARSYSNYYAMDY	5	0.017875
5191	wt	IGHV1-26	ARGDYDVAY	5	0.017875
5193	wt	IGHV3-6	ATYYYGSSPAWFA	5	0.017875
5194	wt	IGHV1-82	ARSGPYAMDY	5	0.017875
5196	wt	IGHV6-6	TRARGWLLRFAY	7	0.025025
5197	wt	IGHV1-36	ARRGYDYDAFAY	2	0.00715001
5200	wt	IGHV8-12	ARPPLYYGYDGDPAWFAY	3	0.010725
5205	wt	IGHV10-3	VRDGWSHAMD	2	0.00715001
5206	wt	IGHV8-12	ARRARDDDGYFSNAMDY	7	0.025025
5207	wt	IGHV1-26	ARASIRGGWYFDY	2	0.00715001
5211	wt	IGHV1S136	VLIRLALISQRPKSKYTMD	2	0.00715001
5215	wt	IGHV5-16	AREPLITTVVATFYDWYF	2	0.00715001
5216	wt	IGHV6-3	TGGTTVDIWFA	5	0.017875
5220	wt	IGHV8-2	WRESATTVVATSDY	9	0.032175
5223	wt	IGHV1-5	TREDYGSSYGFAY	2	0.00715001
5226	wt	IGHV1-54	ARSLLLYFDV	2	0.00715001
5227	wt	IGHV2-6	ATYGNYDWF	2	0.00715001
5228	wt	IGHV4-1	ARGGDYDRPSWFAY	10	0.03575
5229	wt	IGHV1-62-2	ARHEAYYGGFAY	2	0.00715001
5231	wt	IGHV1-19	ARAFMDY	2	0.00715001
5232	wt	IGHV1-78	ASPYYYGSSFD	8	0.0286
5237	wt	IGHV1-54	ASITTEDFDY	10	0.03575
5241	wt	IGHV5-6	ARHGLLLGRYFDV	5	0.017875
5245	wt	IGHV1-78	LYYGYLAWFAY	14	0.0500501
5249	wt	IGHV5-17	ARGVGSSLIWFAY	2	0.00715001
5253	wt	IGHV10-3	VRENRHYYGSSYEYFDV	12	0.0429
5254	wt	IGHV1-16	FHTKYGKFMNYFLERLPMRTYGY	2	0.00715001
5256	wt	IGHV1-26	ARDYYGSSYPFAY	2	0.00715001
5258	wt	IGHV1-26	ARQGYGSRGYAMDY	3	0.010725
5259	wt	IGHV1-26	ARGGPYYSNLAWFAY	2	0.00715001
5260	wt	IGHV3-6	ARVVGNYKGLYYAMD	3	0.010725
5262	wt	IGHV9-3	ANYGSSHWYFDV	2	0.00715001
5264	wt	IGHV10-3	VRGQPYSNHYAMDY	9	0.032175
5268	wt	IGHV9-3	AITRWLGFAY	5	0.017875
5269	wt	IGHV6-3	TGDIYYYGSSYWYFD	3	0.010725
5271	wt	IGHV5-9	ARLHSNYYAMDY	3	0.010725
5272	wt	IGHV1-4	AYGNYYAMDY	24	0.0858001
5273	wt	IGHV1-19	AKRVYGSSPYAMDY	6	0.02145
5275	wt	IGHV10-1	VRPRLNWEAMDY	7	0.025025
5276	wt	IGHV10-3	VRSDGNYGAY	8	0.0286
5279	wt	IGHV1-26	ARKGLSNYSMDY	2	0.00715001
5283	wt	IGHV1-75	ARGKGAMDY	4	0.0143
5284	wt	IGHV1-20	ARSYGSSGGYAMDY	16	0.0572001
5287	wt	IGHV5-16	ARNWDYGSSYWYF	2	0.00715001
5288	wt	IGHV7-1	ARDGARDGEGFAY	2	0.00715001
5292	wt	IGHV1-47	ARKGYDGSLDY	5	0.017875
5293	wt	IGHV1-64	ARGGYSPLAMDY	2	0.00715001
5301	wt	IGHV10-3	VRDGWPHAMDY	2	0.00715001
5310	wt	IGHV9-3	ARHYGSSYWFA	2	0.00715001
5313	wt	IGHV5-4	ARDPIYYGSSYGASAMDY	4	0.0143
5316	wt	IGHV1-12	AYYEGY	5	0.017875
5317	wt	IGHV1-50	ARNYYDYD	2	0.00715001
5328	wt	IGHV1-53	ARSNYGSSHWAWFAY	2	0.00715001
5330	wt	IGHV1-12	ARLYGYYDY	2	0.00715001
5331	wt	IGHV1-62-2	ARHEDYYGSSYDY	2	0.00715001
5332	wt	IGHV13-2	SRGGNGGWFAY	2	0.00715001
5340	wt	IGHV6-3	TGGGLYDASWFA	6	0.02145
5346	wt	IGHV1-26	APFYYGSRYWYFDV	2	0.00715001
5347	wt	IGHV8-12	AREGMEHAIYYYGSSPPWFAY	2	0.00715001
5356	wt	IGHV3-6	ATNYYGSRFSWYF	5	0.017875
5361	wt	IGHV3-1	AREGGGWLLYYAMD	2	0.00715001
5365	wt	IGHV6-3	TDGYYGGGAM	3	0.010725
5368	wt	IGHV9-3	AIREPNLKGYAMDY	4	0.0143
5369	wt	IGHV1-15	TRSLGGYAMDY	2	0.00715001
5370	wt	IGHV3-6	AGGNYYAMD	3	0.010725
5371	wt	IGHV9-3	AESNYGERDY	5	0.017875
5379	wt	IGHV1-62-2	ARHEDAYDYDDVGYAMDY	4	0.0143
5380	wt	IGHV1-26	ALLWYF	3	0.010725
5385	wt	IGHV8-12	ARRDLYYAMDY	6	0.02145
5386	wt	IGHV1-7	ATRVAYYSNSWFAY	2	0.00715001
5390	wt	IGHV1-64	ALGFPSFAY	2	0.00715001
5393	wt	IGHV1-72	ARRDILLMWYFDV	2	0.00715001
5396	wt	IGHV8-8	ARIVITTVVAPFDY	16	0.0572001
5398	wt	IGHV3-6	ARHYYGSRNYY	2	0.00715001
5401	wt	IGHV1-19	ARGYGSYYYAMDY	5	0.017875
5408	wt	IGHV7-4	VKATDGYYVPFAY	13	0.046475
5409	wt	IGHV1-75	ARSDYYYGSSYDYYAMD	2	0.00715001
5417	wt	IGHV9-3	ASDPVRSSWFAY	3	0.010725
5418	wt	IGHV9-3	ARDDYSFAY	2	0.00715001
5419	wt	IGHV1-18	AREGGNGAMDY	2	0.00715001
5422	wt	IGHV1-78	ARLDDGYLWYFDV	2	0.00715001
5424	wt	IGHV1-75	ARFYWRNYFDY	4	0.0143
5428	wt	IGHV1-26	ARGWLRRGFDY	2	0.00715001
5432	wt	IGHV1-18	ARGWLLPYAMDY	2	0.00715001
5435	wt	IGHV1-58	ARGRWLRTDAMD	2	0.00715001
5436	wt	IGHV3-6	ARDQGSRYAMDY	26	0.0929501
5438	wt	IGHV12-3	PGQYGLWF	3	0.010725
5444	wt	IGHV1-26	ARWYYGSSYVYFDV	2	0.00715001
5449	wt	IGHV6-3	TDYYGSSYDYAMDY	6	0.02145
5450	wt	IGHV4-1	ARGGYDYDGGNYYAMDY	6	0.02145
5462	wt	IGHV1-7	ARSLYDYPYYFDY	5	0.017875
5467	wt	IGHV1-26	ARTSGNPSYYFDY	4	0.0143
5476	wt	IGHV1-26	ASYDYVFAY	8	0.0286
5478	wt	IGHV1-87	SEDSAVYYCAWSYGNSSWFAY	4	0.0143
5481	wt	IGHV3-6	ASGLHYAM	2	0.00715001
5484	wt	IGHV6-6	VPYGSLYYYAMDY	18	0.0643501
5490	wt	IGHV5-9-1	TRDRGIGNPFAY	2	0.00715001
5493	wt	IGHV5-17	ARISSGYLYYAMDY	2	0.00715001
5498	wt	IGHV5-2	ARQLYYAMDY	5	0.017875
5500	wt	IGHV1-42	ARYRWLLRSYYYAMDY	10	0.03575
5501	wt	IGHV8-12	ARRDSSGYGGFAY	2	0.00715001
5502	wt	IGHV1-84	AMGNYVDAMDY	5	0.017875
5511	wt	IGHV1-58	ARGSITTVVPFAY	5	0.017875
5516	wt	IGHV7-1	ARDAGGLRGENSGAMDY	12	0.0429
5517	wt	IGHV6-3	TGGYYYGSSPSYWYFD	2	0.00715001
5521	wt	IGHV1-26	ASTMVTTTGFAY	4	0.0143
5527	wt	IGHV8-2	SLLLRY	13	0.046475
5531	wt	IGHV9-1	VKEEDY	2	0.00715001
5535	wt	IGHV6-3	TKTAQAYFDY	18	0.0643501
5538	wt	IGHV8-2	WREKGSNYDCYAM	2	0.00715001
5540	wt	IGHV1-36	ARSGTTVVAPFDY	2	0.00715001
5543	wt	IGHV7-1	ARDDWDYAMDY	12	0.0429
5550	wt	IGHV10-1	VRHLYYGSSYGYFDV	5	0.017875
5552	wt	IGHV9-2	APLYYDYDAWFAY	8	0.0286
5553	wt	IGHV8-8	ARIDGYYVGWFAY	6	0.02145
5559	wt	IGHV6-3	TGSTMITKFA	6	0.02145
5567	wt	IGHV3-6	ASYDSQYFD	3	0.010725
5572	wt	IGHV6-3	TGDYDYDGVDY	14	0.0500501
5574	wt	IGHV9-3	HLLSYAMDY	7	0.025025
5576	wt	IGHV10-3	VREYDFFDY	9	0.032175
5578	wt	IGHV13-2	SREGYDVMFAY	6	0.02145
5581	wt	IGHV1-26	ARHYYGGYYFDY	4	0.0143
5583	wt	IGHV9-4	ARSGTTVVATDYAMDY	7	0.025025
5584	wt	IGHV11-2	MRYRFITTTEFYAMDY	3	0.010725
5585	wt	IGHV6-3	TEGYDYFWYF	5	0.017875
5589	wt	IGHV1-87	SEDSAVYYCAWSYYGSSLYYFDY	3	0.010725
5590	wt	IGHV2-2	ARDYGFAY	3	0.010725
5591	wt	IGHV1-18	ARSGHYYGSSYDYAMDY	5	0.017875
5592	wt	IGHV8-8	ARIGVTTVVPRYYA	3	0.010725
5596	wt	IGHV1-39	ARRRGYYAMDY	8	0.0286
5601	wt	IGHV1-22	ARGGSGDAMDY	3	0.010725
5602	wt	IGHV9-3	ARSGITTVVATDFDV	8	0.0286
5604	wt	IGHV6-3	AYYSNYVGFAY	9	0.032175
5613	wt	IGHV3-6	ARAVYDYDAWF	5	0.017875
5615	wt	IGHV3-6	ARDGYYGSSPHFD	3	0.010725
5617	wt	IGHV1-54	ARSYYSNYSWFAY	4	0.0143
5627	wt	IGHV1-27	ARRGDYDPWFAY	4	0.0143
5629	wt	IGHV1-18	ARSDRHSSLYAMDY	2	0.00715001
5631	wt	IGHV6-3	TGRDDGYYDWFAY	18	0.0643501
5635	wt	IGHV8-8	ARIALFYGSSGGDYFDY	2	0.00715001
5637	wt	IGHV1-18	ARADYGSFDY	3	0.010725
5638	wt	IGHV1-34	ARWGAAQAPGDAMDY	2	0.00715001
5639	wt	IGHV4-1	ARSQATAMDY	6	0.02145
5644	wt	IGHV9-4	ARSSNYYWYFDV	2	0.00715001
5646	wt	IGHV1-26	ARLRVDGYSWYFDV	2	0.00715001
5648	wt	IGHV1-82	AKLREYFDY	3	0.010725
5650	wt	IGHV1-39	ARERLGRAWFAY	3	0.010725
5651	wt	IGHV1-43	TEQSPLTMD	3	0.010725
5653	wt	IGHV6-6	TRRDYYGSRGYYAMDY	3	0.010725
5654	wt	IGHV1-15	TRRITTVVATEDFDY	4	0.0143
5659	wt	IGHV1-19	ARSLRGLDYYAMD	2	0.00715001
5660	wt	IGHV10-3	VRDPHYYGGGY	7	0.025025
5669	wt	IGHV9-3	ARWGSYYYGRVEYFDV	5	0.017875
5675	wt	IGHV1-19	AREGTIYDYEAWFAY	5	0.017875
5679	wt	IGHV1-26	ARSVITTVAHAMDY	6	0.02145
5681	wt	IGHV7-3	AGASYYSNYPAMDY	4	0.0143
5685	wt	IGHV2-3	ANMVTTIAMDY	4	0.0143
5687	wt	IGHV8-8	ARINYDYDSSFAY	11	0.039325
5688	wt	IGHV1-5	TRDWSYDGYYDRYFDV	2	0.00715001
5689	wt	IGHV1-26	ARGAYYSNSDYFDY	8	0.0286
5690	wt	IGHV1-64	ARRYFDY	2	0.00715001
5698	wt	IGHV3-6	ARTIYDYSFAY	10	0.03575
5700	wt	IGHV3-6	AREYDYDVRGFAY	3	0.010725
5701	wt	IGHV1-26	ARPPFITTVVAKDAMDY	10	0.03575
5704	wt	IGHV3-1	ARDEGSGRRYFD	2	0.00715001
5708	wt	IGHV1-26	ARNPIYYDFD	4	0.0143
5711	wt	IGHV1-5	TRSGSSLWYFDV	2	0.00715001
5712	wt	IGHV1-15	TIPIYYYGSKGAWFAY	6	0.02145
5713	wt	IGHV1-31	ARVDYYGREVDFDV	6	0.02145
5714	wt	IGHV8-12	ALRRIYYYGSRYFDV	8	0.0286
5715	wt	IGHV6-3	TGSWLLHAMD	4	0.0143
5716	wt	IGHV3-6	AGTTGRAM	5	0.017875
5719	wt	IGHV1-78	ARMSTVVATDWYFDV	6	0.02145
5720	wt	IGHV8-12	ARRGIRNYFDY	4	0.0143
5723	wt	IGHV8-12	ARRGYYYAMDY	10	0.03575
5727	wt	IGHV10-1	VRQSGGLRRSYAMDY	9	0.032175
5728	wt	IGHV3-6	ARGIIHTRGYFD	2	0.00715001
5729	wt	IGHV13-2	SSDYTGGFA	2	0.00715001
5733	wt	IGHV3-6	ARADYDGYYVWY	3	0.010725
5735	wt	IGHV14-2	ARRWYGMDY	5	0.017875
5740	wt	IGHV6-3	TSTVVPLYAM	3	0.010725
5744	wt	IGHV1-19	ASQGDFTTVPQSSWFAY	6	0.02145
5745	wt	IGHV7-3	ARSYGSSYPYWYFDV	2	0.00715001
5746	wt	IGHV3-6	ARRVVATPYWY	3	0.010725
5747	wt	IGHV15-2	ARGYYGSSPSYWYFDV	11	0.039325
5749	wt	IGHV10-1	VRGGDSSGHVSYAMDY	6	0.02145
5751	wt	IGHV1-58	AREDYYGSSSSYAMDY	2	0.00715001
5757	wt	IGHV1-26	APYYYGSSYEGFAY	3	0.010725
5760	wt	IGHV1-20	ARRYFD	2	0.00715001
5762	wt	IGHV2-2	ARKNDYHWYFDV	2	0.00715001
5764	wt	IGHV6-3	TGLWYYGNWFA	3	0.010725
5766	wt	IGHV3-6	AREGVYYSNYYAMDY	3	0.010725
5769	wt	IGHV1-63	ARLLRYAMDY	4	0.0143
5770	wt	IGHV1-26	ARDWFHFD	2	0.00715001
5771	wt	IGHV1-26	ARGLDGNYVNYAMDY	2	0.00715001
5778	wt	IGHV3-6	ARDTTVVATRAWFAY	3	0.010725
5784	wt	IGHV10-3	VREDGYYLYYYAMDY	10	0.03575
5789	wt	IGHV1-78	ARSRDGSFDY	10	0.03575
5790	wt	IGHV10-3	VRDYGSSWSWYF	2	0.00715001
5795	wt	IGHV1-26	ARGGYDYGPLFDY	2	0.00715001
5799	wt	IGHV6-3	TGSSYYSNYYYYAMDY	12	0.0429
5801	wt	IGHV7-3	ARWGGLGY	2	0.00715001
5808	wt	IGHV1-72	ARRIITTVVATKDYWYFDV	2	0.00715001
5814	wt	IGHV8-8	ARIAGYYGSSYF	3	0.010725
5815	wt	IGHV5-16	ARDQGGISYAMD	3	0.010725
5816	wt	IGHV1-26	ARRGGYGNYPSYAMDY	6	0.02145
5817	wt	IGHV10-1	VRQGIYYDRHYYAMDY	2	0.00715001
5820	wt	IGHV3-8	ARVYYGSSYGDYFDY	9	0.032175
5821	wt	IGHV7-1	ARGPMVGLGGYFDV	2	0.00715001
5824	wt	IGHV6-6	TRSWDGFAY	9	0.032175
5830	wt	IGHV1-26	ARMEVYYDYSAWFAY	5	0.017875
5833	wt	IGHV3-6	AREDYYDEDY	3	0.010725
5837	wt	IGHV6-3	TGGSNYWYF	7	0.025025
5846	wt	IGHV1-77	ARNWGNYDSFAY	2	0.00715001
5848	wt	IGHV5-16	ARIYDGYYGGAMDY	3	0.010725
5851	wt	IGHV1-18	ARGYYGSSPWFAY	2	0.00715001
5853	wt	IGHV1-18	ARGNYGSSYDWYFDV	2	0.00715001
5856	wt	IGHV5-12	ARRGDWDGGYAMDY	3	0.010725
5859	wt	IGHV2-3	AKPGGGNREYYYAMDY	2	0.00715001
5860	wt	IGHV1-26	ASDWYYGSYWYFDV	3	0.010725
5864	wt	IGHV1-22	ANGYYRYFDV	4	0.0143
5866	wt	IGHV1-5	TRSLYYYGSRRVFDY	4	0.0143
5870	wt	IGHV3-8	ARGGGSSYFD	2	0.00715001
5873	wt	IGHV1-15	TRDGIYYGNYDAMDY	7	0.025025
5874	wt	IGHV1-22	ARSRGYYFDY	3	0.010725
5877	wt	IGHV9-4	ARDGYYPYYAMDY	5	0.017875
5878	wt	IGHV6-6	TRPLTGRAWFA	2	0.00715001
5884	wt	IGHV10-3	VRDEPFFTTVVPNYYAMDY	4	0.0143
5885	wt	IGHV10-3	VRERYYYGSSYVVFDY	10	0.03575
5888	wt	IGHV5-16	ARDGYYAMDY	10	0.03575
5889	wt	IGHV5-12	ARRGKLGFDY	2	0.00715001
5893	wt	IGHV6-3	TGEGALGYDEFA	3	0.010725
5895	wt	IGHV9-3	ASPPITTVVATDY	3	0.010725
[truncated: 29,180 more rows]
