# Supplementary material for: Kidins220 regulates the development of B cells bearing the λ light chain
Source: eLife. 2024 Jan 25;13:e83943. doi: 10.7554/eLife.83943 (PMC10810608; doi:10.7554/eLife.83943)
Supplement: Figure 2—figure supplement 1—source data 1. [file elife-83943-fig2-figsupp1-data1.xlsx]

## Sheet: Figure 2-figure supplement1 B
E12
		CTRL				B-KO
	d0	0.02	0.04	0.01	0.09	0.03	0.05	0.01
	d1	0.16	0.19	0.39	0.38	0.24	0.34	0.44
	d2		0.7	0.86	1.27		1.06	0.7
	d3		0.6	0.95	1.07		0.76	0.95
2way ANOVA
Uncorrected Fisher's LSD	Predicted (LS) mean diff,	95,00% CI of diff,	Below threshold?	Summary	Individual P Value
B-KO - CTRL
d0	-0.01	-0,2798 to 0,2598	No	ns	0.9383
d1	0.06	-0,2098 to 0,3298	No	ns	0.6437
d2	-0.06333	-0,3858 to 0,2591	No	ns	0.6827
d3	-0.01833	-0,3408 to 0,3041	No	ns	0.9056
E47
		CTRL				B-KO
	d0	0.03	0.17	0	0.42	0.11	0.22	0.02
	d1	0.58	0.81	1.28	1.09	0.68	1.7	1.4
	d2		3.24	3.59	4.23		5.12	2.23
	d3		3.04	3.43	3.77		4.44	3.86
2way ANOVA
Uncorrected Fisher's LSD	Predicted (LS) mean diff,	95,00% CI of diff,	Below threshold?	Summary	Individual P Value
B-KO - CTRL
d0	-0.03833	-1,036 to 0,9597	No	ns	0.9361
d1	0.32	-0,6780 to 1,318	No	ns	0.5064
d2	-0.01167	-1,205 to 1,181	No	ns	0.9837
d3	0.7367	-0,4562 to 1,930	No	ns	0.209
Rag1
		CTRL				B-KO
	d0	0.01	0.04	0	0.05	0.02	0.08	0.01
	d1	0.29	0.79	0.35	0.55	0.49	2.07	0.95
	d2		5.78	1.22	4.13		11.39	1.48
	d3		5.43	4.5	3.94		10.97	4.66
2way ANOVA
Uncorrected Fisher's LSD	Predicted (LS) mean diff,	95,00% CI of diff,	Below threshold?	Summary	Individual P Value
B-KO - CTRL
d0	0.01167	-3,660 to 3,683	No	ns	0.9947
d1	0.675	-2,997 to 4,347	No	ns	0.7019
d2	2.725	-1,664 to 7,114	No	ns	0.2066
d3	3.192	-1,197 to 7,580	No	ns	0.1427
Rag2
		CTRL				B-KO
	d0	0.04	0.05	0.03	0.04	0.04	0.07	0.02
	d1	0.47	0.64	0.45	0.47	0.88	1.07	0.74
	d2		1.61	1.61	1.53		2.17	1.46
	d3		1.24	1.71	1.05		1.96	1.05
2way ANOVA
Uncorrected Fisher's LSD	Predicted (LS) mean diff,	95,00% CI of diff,	Below threshold?	Summary	Individual P Value
B-KO - CTRL
d0	0.003333	-0,3976 to 0,4043	No	ns	0.9862
d1	0.3892	-0,01180 to 0,7901	No	ns	0.0563
d2	0.2317	-0,2476 to 0,7109	No	ns	0.3207
d3	0.1717	-0,3076 to 0,6509	No	ns	0.4587

## Sheet: Figure 2-figure supplement1 C
E12
		CTRL						B-KO
	pro				2.45844	2.80311	1.98472				4.5487	1.67878	1.57961
	pre	0.362762	0.539166	0.325967	0.434196	0.614201	0.485365	0.200488	0.514233	0.498139	0.696693		0.4604
	immature	0.131788	0.0706054	0.150029	0.457492	0.578701	0.697802	0.200712	0.167111	0.0950123	0.881155		0.33517
2way ANOVA
Uncorrected Fisher's LSD	Predicted (LS) mean diff,	95,00% CI of diff,	Below threshold?	Summary	Individual P Value
CTRL - B-KO
pro	-0.1869	-1,140 to 0,7657	No	ns	0.688
pre	-0.01371	-0,7202 to 0,6928	No	ns	0.9683
immature	0.0119	-0,6946 to 0,7184	No	ns	0.9724
E47
		CTRL						B-KO
	pro				0.525017	0.515905	0.892666				0.423857	0.607053	0.788284
	pre	1.13501	1.1725	1.40313	0.960419	1.01135	1.38651	1.53329	1.60719	1.84936	1.1032		1.04279
	immature	0.517735	0.223458	0.391567	0.403723	0.678595	0.635223	0.643553	0.478198	0.430195	0.347849		0.72481
2way ANOVA
Uncorrected Fisher's LSD	Predicted (LS) mean diff,	95,00% CI of diff,	Below threshold?	Summary	Individual P Value
CTRL - B-KO
pro	0.03813	-0,3310 to 0,4072	No	ns	0.8323
pre	-0.249	-0,5228 to 0,02473	No	ns	0.0725
immature	-0.04987	-0,3236 to 0,2239	No	ns	0.7092
Rag1
		CTRL						B-KO
	pro				13.4132	16.5259	9.52162				23.8135	10.0715	9.40712
	pre	3.10531	2.41752	3.36648	2.70532	2.76034	3.14567	3.54939	4.48127	6.89356	3.84419		3.92582
	immature	0.231954	0.0795649	0.186457	1.71556	2.61509	3.23685	0.24458	0.179887	0.157743	5.38219		2.34489
2way ANOVA
Uncorrected Fisher's LSD	Predicted (LS) mean diff,	95,00% CI of diff,	Below threshold?	Summary	Individual P Value
CTRL - B-KO
pro	-1.277	-6,321 to 3,767	No	ns	0.6047
pre	-1.622	-5,363 to 2,118	No	ns	0.3782
immature	-0.3176	-4,058 to 3,423	No	ns	0.8618
Rag2
		CTRL						B-KO
	pro				10.9028	15.1499	8.61963				22.7376	8.42024	7.50227
	pre	0.657878	0.853756	0.736168	1.28051	1.70792	1.41534	0.728898	0.82541	0.974786	1.37381		0.911428
	immature	0.101021	0.0575678	0.118115	1.33454	2.3304	2.72364	0.0840928	0.0834512	0.0794169	5.20499		1.94078
2way ANOVA
Uncorrected Fisher's LSD	Predicted (LS) mean diff,	95,00% CI of diff,	Below threshold?	Summary	Individual P Value
CTRL - B-KO
pro	-1.329	-6,387 to 3,729	No	ns	0.5912
pre	0.1457	-3,605 to 3,897	No	ns	0.9365
immature	-0.3677	-4,119 to 3,383	No	ns	0.8408
Irf4
		CTRL						B-KO
	pro				5.72847	5.9121	3.37074				8.55025	3.58232	2.90073
	pre	2.0593	1.96747	2.47972	2.09583	2.05654	2.12026	1.98957	2.38611	3.0979	2.56429		2.0531
	immature	0.471114	0.271904	0.49234	0.942223	1.62167	1.57988	0.475249	0.480613	0.360963	1.78369		1.70258
2way ANOVA
Uncorrected Fisher's LSD	Predicted (LS) mean diff,	95,00% CI of diff,	Below threshold?	Summary	Individual P Value
CTRL - B-KO
pro	-0.007328	-1,910 to 1,896	No	ns	0.9937
pre	-0.2883	-1,700 to 1,123	No	ns	0.6759
immature	-0.0641	-1,475 to 1,347	No	ns	0.9258

## Sheet: Figure 2-figure supplement1 D
	CTRL			B-KO
d0	19.3	9.24	17.3	15	11.6
d3	9.43	30.6	35	18.9	30.7
