# Supplementary material for: Kidins220 regulates the development of B cells bearing the λ light chain
Source: eLife. 2024 Jan 25;13:e83943. doi: 10.7554/eLife.83943 (PMC10810608; doi:10.7554/eLife.83943)
Supplement: Figure 2—source data 1. [file elife-83943-fig2-data1.xlsx]

## Sheet: Figure 2B
IgM
		CTRL								B-KO
	d0	1.31	0.75	0.65	0.62	0.75	0.68	0.84	0.61	0.73	0.71	0.55	0.53	0.65	1.29	1.35
	d1	1.02	0.88	0.38	0.36	0.5	0.47	0.72	0.67	0.56	1.06	0.2	0.19	0.37	1.72	1.46
	d2	3.38	1.11	0.86	0.95	1.07		0.63	0.46	3.85	1.59	0.95	1.09	1.02	1.99	1.68
	d3	11.18	2.12	1.77	1.74	2.53		1.28	1.32	22.88	5.25	2.51	2.11	2.32	3.86	3.07
2way ANOVA
Uncorrected Fisher's LSD	Predicted (LS) mean diff,	95,00% CI of diff,	Below threshold?	Summary	Individual P Value
CTRL - B-KO
d0	-0.05375	-3,109 to 3,002	No	ns	0.972
d1	-0.1693	-3,225 to 2,886	No	ns	0.9118
d2	-0.53	-3,685 to 2,625	No	ns	0.7373
d3	-2.866	-6,021 to 0,2898	No	ns	0.0741
Igk
		CTRL								B-KO
	d0	0.73	0.73	2.5	2.05	0.63	0.89	0.69	0.67	0.39	0.69	1.04	1.2	1.73	1.41	1.4
	d1	0.91	0.82	1.82	1.55	0.43	0.34	0.41	0.73	0.5	0.89	0.68	0.82	1.58	1.38	1.2
	d2	3.25	1.98	2.49	2.31	0.88		0.81	1.11	4.17	2.56	1.29	1.95	2.66	3.18	2.64
	d3	11.47	3.46	3.6	3.43	1.34		1.1	1.69	24.18	6.88	2.56	3.52	4.79	4.99	3.69
2way ANOVA
Uncorrected Fisher's LSD	Predicted (LS) mean diff,	95,00% CI of diff,	Below threshold?	Summary	Individual P Value
CTRL - B-KO
d0	-0.01161	-3,101 to 3,077	No	ns	0.994
d1	-0.1309	-3,220 to 2,958	No	ns	0.9325
d2	-0.8029	-3,993 to 2,387	No	ns	0.6154
d3	-3.503	-6,693 to -0,3126	Yes	*	0.0321
Igl
		CTRL								B-KO
	d0	0.15	0.23	0.14	0.12	0.18	0.15	0.13	0.09	0.09	0.19	0.49	0.36	0.17	0.07	0.16
	d1	0.13	0.54	0.07	0.06	0.12	0.09	0.31	0.29	0.1	0.32	0.51	0.07	0.08	0.24	0.3
	d2	0.25	0.29	0.14	0.11	0.56		0.29	0.11	0.12	0.28	0.44	0.13	0.13	0.35	0.56
	d3	0.57	0.1	0.24	0.15	1.36		0.53	0.53	0.25	0.25	0.17	0.09	0.19	0.24	0.46
2way ANOVA
Uncorrected Fisher's LSD	Predicted (LS) mean diff,	95,00% CI of diff,	Below threshold?	Summary	Individual P Value
CTRL - B-KO
d0	-0.06982	-0,2781 to 0,1385	No	ns	0.5039
d1	-0.03018	-0,2385 to 0,1781	No	ns	0.7723
d2	-0.03714	-0,2523 to 0,1780	No	ns	0.7302
d3	0.2614	0,04629 to 0,4766	Yes	*	0.0182

## Sheet: Figure 2C
Igk GL
		CTRL				KO
	d0	0.06	0.03	0.02	0.02	0.08	0.02	0.01
	d1	0.17	0.05	0.14	0.19	0.27	0.04	0.16
	d2		0.52	0.28	0.61		0.68	0.69
	d3	0.08	0.3	0.15	0.29	0.12	0.49	0.45
2way ANOVA
Uncorrected Fisher's LSD	Predicted (LS) mean diff,	95,00% CI of diff,	Below threshold?	Summary	Individual P Value
KO - CTRL
d0	0.004167	-0,1722 to 0,1806	No	ns	0.961
d1	0.01917	-0,1572 to 0,1956	No	ns	0.822
d2	0.215	0,004180 to 0,4258	Yes	*	0.0461
d3	0.1483	-0,02805 to 0,3247	No	ns	0.0942
Igl GL
		CTRL				KO
	d0	0	0	0	0	0	0	0
	d1	0.01	0	0.01	0.01	0	0	0
	d2	0.11	0.02	0.06	0.09	0.01	0	0.01
	d3	0.3	0.11	0.43	0.48	0	0.02	0.05
2way ANOVA
Uncorrected Fisher's LSD	Predicted (LS) mean diff,	95,00% CI of diff,	Below threshold?	Summary	Individual P Value
KO - CTRL
d0	0	-0,1056 to 0,1056	No	ns	>0,9999
d1	-0.0075	-0,1131 to 0,09806	No	ns	0.8837
d2	-0.06333	-0,1689 to 0,04223	No	ns	0.2252
d3	-0.3067	-0,4122 to -0,2011	Yes	****	<0,0001

## Sheet: Figure 2D
Igk GL
		CTRL						B-KO
	pro				0.00132176	0.000306774	0.000904483				0.000265172	5.64369e-05	0.000242465
	pre	0.478786	0.697331	0.487748	0.6454	0.24826	0.207495	0.466267	0.670353	0.669207	0.771209		0.141895
	immature	0.18551	0.10146	0.237188	0.173124	0.00216822	0.00115984	0.169618	0.215131	0.248445	0.160906		1.04232e-05
2way ANOVA
	Uncorrected Fisher's LSD	Predicted (LS) mean diff,	95,00% CI of diff,	Below threshold?	Summary	Individual P Value
	CTRL - B-KO
	pro	0.0006563	-0,2639 to 0,2652	No	ns	0.9959
	pre	-0.08295	-0,2792 to 0,1133	No	ns	0.3901
	immature	-0.04205	-0,2383 to 0,1542	No	ns	0.661
Igl GL
		CTRL						B-KO
	pro				0.0041489	0.00209543	0.00125475				0.00308657	0.000115609	0.000508623
	pre	0.373169	0.733791	0.29057	0.333377	0.439512	0.343201		0.042011	0.0384614	0.0564183		0.0401068
	immature	0.665473	0.272652	0.5446	0.622908	0.431881	0.473268	0.28542	0.202854	0.160709	0.145057		0.143945
2way ANOVA
	Uncorrected Fisher's LSD	Predicted (LS) mean diff,	95,00% CI of diff,	Below threshold?	Summary	Individual P Value
	CTRL - B-KO
	pro	0.001263	-0,1829 to 0,1855	No	ns	0.9888
	pre	0.3747	0,2291 to 0,5203	Yes	****	<0,0001
	immature	0.3142	0,1776 to 0,4508	Yes	***	0.0001
