# Supplementary material for: Kidins220 regulates the development of B cells bearing the λ light chain
Source: eLife. 2024 Jan 25;13:e83943. doi: 10.7554/eLife.83943 (PMC10810608; doi:10.7554/eLife.83943)
Supplement: Figure 3—figure supplement 1—source data 1. [file elife-83943-fig3-figsupp1-data1.xlsx]

## Sheet: Figure 3-figure supplement1B
	CTRL iEκ+/T							B-KO iEκ+/T							CTRL iEκT/T							B-KO iEκT/T
B220+	28.8	27.2	12.2	26.6		27.8	19.1	29.5	19.6				26.8	20.1	29.4	28	32.2			22.9	17.6	22.6	30.4	24.6	19	22.1	22.9	21.2
One way ANOVA
Uncorrected Fisher's LSD	Mean Diff,	95,00% CI of diff,	Below threshold?	Summary	Individual P Value
CTRL iEκ+/T vs. B-KO iEκ+/T	-0.3833	-7,536 to 6,770	No	ns	0.9116	A-B
CTRL iEκ+/T vs. CTRL iEκT/T	-2.403	-9,113 to 4,307	No	ns	0.4615	A-C
CTRL iEκ+/T vs. B-KO iEκT/T	0.3595	-5,805 to 6,525	No	ns	0.9038	A-D
B-KO iEκ+/T vs. CTRL iEκT/T	-2.02	-9,453 to 5,413	No	ns	0.5751	B-C
B-KO iEκ+/T vs. B-KO iEκT/T	0.7429	-6,203 to 7,688	No	ns	0.8247	B-D
CTRL iEκT/T vs. B-KO iEκT/T	2.763	-3,726 to 9,251	No	ns	0.3828	C-D

## Sheet: Figure 3-figure supplement1C
	CTRL iEκ+/T							B-KO iEκ+/T							CTRL iEκT/T							B-KO iEκT/T
pre/pro	69.24	72.54	68.05	68.63		65.69	68.49	71.46	77.73				56.84	70.33	86.64	82.42	89.17			86.17	84.93	97.56	97.21	97.33	97.86	97.59	97.18	97.42
immature	19.89	15.46	8.56	16.45		14.85	16.6	18.19	12.63				30.3	17.94	7.9	9.82	6.14			6.43	7.61	1.62	1.91	1.69	1.15	1.16	2.08	1.66
mature	9.95	11.06	22.05	13.81		18.57	13.96	9.47	8.91				8.74	10.91	4.82	7.18	4.02			6.8	6.94	0.37	0.49	0.57	0.58	0.43	0.3	0.14
2way ANOVA
Uncorrected Fisher's LSD	Predicted (LS) mean diff,	95,00% CI of diff,	Below threshold?	Summary	Individual P Value
pre/pro
CTRL iEκ+/T vs. B-KO iEκ+/T	-0.3167	-4,789 to 4,156	No	ns	0.8876
CTRL iEκ+/T vs. CTRL iEκT/T	-17.09	-21,29 to -12,90	Yes	****	<0,0001
CTRL iEκ+/T vs. B-KO iEκT/T	-28.68	-32,53 to -24,82	Yes	****	<0,0001
B-KO iEκ+/T vs. CTRL iEκT/T	-16.78	-21,42 to -12,13	Yes	****	<0,0001
B-KO iEκ+/T vs. B-KO iEκT/T	-28.36	-32,70 to -24,02	Yes	****	<0,0001
CTRL iEκT/T vs. B-KO iEκT/T	-11.58	-15,64 to -7,527	Yes	****	<0,0001
immature
CTRL iEκ+/T vs. B-KO iEκ+/T	-4.463	-8,936 to 0,009294	No	ns	0.0505
CTRL iEκ+/T vs. CTRL iEκT/T	7.722	3,526 to 11,92	Yes	***	0.0005
CTRL iEκ+/T vs. B-KO iEκT/T	13.69	9,837 to 17,55	Yes	****	<0,0001
B-KO iEκ+/T vs. CTRL iEκT/T	12.19	7,537 to 16,83	Yes	****	<0,0001
B-KO iEκ+/T vs. B-KO iEκT/T	18.16	13,81 to 22,50	Yes	****	<0,0001
CTRL iEκT/T vs. B-KO iEκT/T	5.97	1,913 to 10,03	Yes	**	0.0047
mature
CTRL iEκ+/T vs. B-KO iEκ+/T	5.393	0,9199 to 9,865	Yes	*	0.019
CTRL iEκ+/T vs. CTRL iEκT/T	8.948	4,752 to 13,14	Yes	****	<0,0001
CTRL iEκ+/T vs. B-KO iEκT/T	14.49	10,63 to 18,34	Yes	****	<0,0001
B-KO iEκ+/T vs. CTRL iEκT/T	3.556	-1,093 to 8,204	No	ns	0.131
B-KO iEκ+/T vs. B-KO iEκT/T	9.096	4,753 to 13,44	Yes	***	0.0001
CTRL iEκT/T vs. B-KO iEκT/T	5.541	1,483 to 9,598	Yes	**	0.0084

## Sheet: Figure 3-figure supplement1D
	CTRL iEκ+/T							B-KO iEκ+/T							CTRL iEκT/T							B-KO iEκT/T
IgM+	28.2	21.4	19.3	21.1		20.9	25	25.5	16.4				17.1	23	12.9	13.9	6.9			7.8	7.6	1.9	1.6	1.9	1.5	0.8	1.9	1.1
One way ANOVA
Uncorrected Fisher's LSD	Mean Diff,	95,00% CI of diff,	Below threshold?	Summary	Individual P Value
CTRL iEκ+/T vs. B-KO iEκ+/T	2.15	-1,881 to 6,181	No	ns	0.2771	A-B
CTRL iEκ+/T vs. CTRL iEκT/T	12.83	9,049 to 16,61	Yes	****	<0,0001	A-C
CTRL iEκ+/T vs. B-KO iEκT/T	21.12	17,65 to 24,60	Yes	****	<0,0001	A-D
B-KO iEκ+/T vs. CTRL iEκT/T	10.68	6,491 to 14,87	Yes	****	<0,0001	B-C
B-KO iEκ+/T vs. B-KO iEκT/T	18.97	15,06 to 22,89	Yes	****	<0,0001	B-D
CTRL iEκT/T vs. B-KO iEκT/T	8.291	4,635 to 11,95	Yes	***	0.0002	C-D

## Sheet: Figure 3-figure supplement1E
	CTRL iEκ+/T							B-KO iEκ+/T							CTRL iEκT/T							B-KO iEκT/T
kappa+	18.5	17.2	17.9	18.2		18	19.3	22.2	16.3				15.5	22.1	0.1	0.1	0.1			0.2	0.2	0.1	0.2	0.1	0.3	0.2	0.1	0.1
One way ANOVA
Uncorrected Fisher's LSD	Mean Diff,	95,00% CI of diff,	Below threshold?	Summary	Individual P Value
CTRL iEκ+/T vs. B-KO iEκ+/T	-0.8417	-2,910 to 1,227	No	ns	0.4038	A-B
CTRL iEκ+/T vs. CTRL iEκT/T	18.04	16,10 to 19,98	Yes	****	<0,0001	A-C
CTRL iEκ+/T vs. B-KO iEκT/T	18.03	16,24 to 19,81	Yes	****	<0,0001	A-D
B-KO iEκ+/T vs. CTRL iEκT/T	18.89	16,74 to 21,03	Yes	****	<0,0001	B-C
B-KO iEκ+/T vs. B-KO iEκT/T	18.87	16,86 to 20,88	Yes	****	<0,0001	B-D
CTRL iEκT/T vs. B-KO iEκT/T	-0.01714	-1,893 to 1,859	No	ns	0.9849	C-D

## Sheet: Figure 3-figure supplement1F
	CTRL iEκ+/T							B-KO iEκ+/T							CTRL iEκT/T							B-KO iEκT/T
lambda+	6.8	5.2	4.8	5.4		5.4	7.3	0.7	0.4				0.4	0.6	11.1	13.5	8.1			11.3	11	1.8	2.3	2.2	1.8	1.8	2.5	2.1
One way ANOVA
Uncorrected Fisher's LSD	Mean Diff,	95,00% CI of diff,	Below threshold?	Summary	Individual P Value
CTRL iEκ+/T vs. B-KO iEκ+/T	5.292	3,854 to 6,729	Yes	****	<0,0001	A-B
CTRL iEκ+/T vs. CTRL iEκT/T	-5.183	-6,532 to -3,835	Yes	****	<0,0001	A-C
CTRL iEκ+/T vs. B-KO iEκT/T	3.745	2,506 to 4,984	Yes	****	<0,0001	A-D
B-KO iEκ+/T vs. CTRL iEκT/T	-10.48	-11,97 to -8,981	Yes	****	<0,0001	B-C
B-KO iEκ+/T vs. B-KO iEκT/T	-1.546	-2,942 to -0,1504	Yes	*	0.0318	B-D
CTRL iEκT/T vs. B-KO iEκT/T	8.929	7,624 to 10,23	Yes	****	<0,0001	C-D

## Sheet: Figure 3-figure supplement1G
	CTRL iEκ+/T							B-KO iEκ+/T							CTRL iEκT/T							B-KO iEκT/T
B220+	46.5	41	27.3	31.8		31.5	35.6	50.6	35.9				42.9	29.4	31.7	20.8	23.5			24.6	19.8	15	12.8	11.3	8.7	10	8.2	6.2
One way ANOVA
Uncorrected Fisher's LSD	Mean Diff,	95,00% CI of diff,	Below threshold?	Summary	Individual P Value
CTRL iEκ+/T vs. B-KO iEκ+/T	-4.083	-12,16 to 3,995	No	ns	0.3023	A-B
CTRL iEκ+/T vs. CTRL iEκT/T	11.54	3,959 to 19,11	Yes	**	0.005	A-C
CTRL iEκ+/T vs. B-KO iEκT/T	25.3	18,34 to 32,26	Yes	****	<0,0001	A-D
B-KO iEκ+/T vs. CTRL iEκT/T	15.62	7,225 to 24,01	Yes	**	0.001	B-C
B-KO iEκ+/T vs. B-KO iEκT/T	29.39	21,54 to 37,23	Yes	****	<0,0001	B-D
CTRL iEκT/T vs. B-KO iEκT/T	13.77	6,438 to 21,09	Yes	***	0.0009	C-D

## Sheet: Figure 3-figure supplement1H
	CTRL iEκ+/T							B-KO iEκ+/T							CTRL iEκT/T							B-KO iEκT/T
IgM+	96.1	97	94.4	96.2		96.2	96.4	97.9	97.1				96.5	94.2	93.5	93.6	93.9			93	90.9	87.8	85	89.2	75.7	83	76.4	64.6
One way ANOVA
Uncorrected Fisher's LSD	Mean Diff,	95,00% CI of diff,	Below threshold?	Summary	Individual P Value
CTRL iEκ+/T vs. B-KO iEκ+/T	-0.375	-7,267 to 6,517	No	ns	0.9103	A-B
CTRL iEκ+/T vs. CTRL iEκT/T	3.07	-3,395 to 9,535	No	ns	0.3317	A-C
CTRL iEκ+/T vs. B-KO iEκT/T	15.81	9,867 to 21,75	Yes	****	<0,0001	A-D
B-KO iEκ+/T vs. CTRL iEκT/T	3.445	-3,717 to 10,61	No	ns	0.3256	B-C
B-KO iEκ+/T vs. B-KO iEκT/T	16.18	9,490 to 22,87	Yes	****	<0,0001	B-D
CTRL iEκT/T vs. B-KO iEκT/T	12.74	6,485 to 18,99	Yes	***	0.0005	C-D

## Sheet: Figure 3-figure supplement1I
	CTRL iEκ+/T							B-KO iEκ+/T							CTRL iEκT/T							B-KO iEκT/T
CD93+	8.82	9.22	3.94	9.98		10.79	7.99	6.02	6.03				5.56	10.5	11.21	10.14	8.32			6.15	7.1	4.51	7.63	3.52	4.19	3.23	5.09	3.8
One way ANOVA
Uncorrected Fisher's LSD	Mean Diff,	95,00% CI of diff,	Below threshold?	Summary	Individual P Value
CTRL iEκ+/T vs. B-KO iEκ+/T	1.429	-1,359 to 4,218	No	ns	0.2958	A-B
CTRL iEκ+/T vs. CTRL iEκT/T	-0.1273	-2,743 to 2,489	No	ns	0.9197	A-C
CTRL iEκ+/T vs. B-KO iEκT/T	3.89	1,486 to 6,293	Yes	**	0.0032	A-D
B-KO iEκ+/T vs. CTRL iEκT/T	-1.557	-4,454 to 1,341	No	ns	0.274	B-C
B-KO iEκ+/T vs. B-KO iEκT/T	2.46	-0,2473 to 5,168	No	ns	0.0723	B-D
CTRL iEκT/T vs. B-KO iEκT/T	4.017	1,487 to 6,546	Yes	**	0.0037	C-D

## Sheet: Figure 3-figure supplement1J
	CTRL iEκ+/T							B-KO iEκ+/T							CTRL iEκT/T							B-KO iEκT/T
FO	81.67	82.41	72.18	83.4		79.63	86.13	79.73	78.88				78.68	71.39	64.79	71.19	70.64			59.7	67.79	41.5	47.77	42.27	33.69	37.01	36.84	28.59
One way ANOVA
Uncorrected Fisher's LSD	Mean Diff,	95,00% CI of diff,	Below threshold?	Summary	Individual P Value
CTRL iEκ+/T vs. B-KO iEκ+/T	3.733	-3,297 to 10,76	No	ns	0.2792	A-B
CTRL iEκ+/T vs. CTRL iEκT/T	14.08	7,486 to 20,68	Yes	***	0.0003	A-C
CTRL iEκ+/T vs. B-KO iEκT/T	42.66	36,61 to 48,72	Yes	****	<0,0001	A-D
B-KO iEκ+/T vs. CTRL iEκT/T	10.35	3,042 to 17,65	Yes	**	0.0081	B-C
B-KO iEκ+/T vs. B-KO iEκT/T	38.93	32,11 to 45,76	Yes	****	<0,0001	B-D
CTRL iEκT/T vs. B-KO iEκT/T	28.58	22,21 to 34,96	Yes	****	<0,0001	C-D

## Sheet: Figure 3-figure supplement1K
	CTRL iEκ+/T							B-KO iEκ+/T							CTRL iEκT/T							B-KO iEκT/T
MZ	10.83	12.36	19.58	10.25		12.87	7.95	12.97	16.34				15.94	22.53	26.28	21.8	21.91			30.54	24.35	43.05	38.05	44.29	44.98	46.72	42.84	39.9
One way ANOVA
Uncorrected Fisher's LSD	Mean Diff,	95,00% CI of diff,	Below threshold?	Summary	Individual P Value
CTRL iEκ+/T vs. B-KO iEκ+/T	-4.638	-9,516 to 0,2397	No	ns	0.0611	A-B
CTRL iEκ+/T vs. CTRL iEκT/T	-12.67	-17,25 to -8,093	Yes	****	<0,0001	A-C
CTRL iEκ+/T vs. B-KO iEκT/T	-30.53	-34,73 to -26,32	Yes	****	<0,0001	A-D
B-KO iEκ+/T vs. CTRL iEκT/T	-8.031	-13,10 to -2,962	Yes	**	0.0037	B-C
B-KO iEκ+/T vs. B-KO iEκT/T	-25.89	-30,62 to -21,15	Yes	****	<0,0001	B-D
CTRL iEκT/T vs. B-KO iEκT/T	-17.86	-22,28 to -13,43	Yes	****	<0,0001	C-D

[truncated: 2 more sheets: Figure 3-figure supplement1L, Figure 3-figure supplement1M]
