# Supplementary material for: Kidins220 regulates the development of B cells bearing the λ light chain
Source: eLife. 2024 Jan 25;13:e83943. doi: 10.7554/eLife.83943 (PMC10810608; doi:10.7554/eLife.83943)
Supplement: Figure 3—source data 1. [file elife-83943-fig3-data1.xlsx]

## Sheet: Figure 3B
	CTRL iEκ+/T							B-KO iEκ+/T							CTRL iEκT/T							B-KO iEκT/T
total cell numbers	66300000	79000000	49600000	100000000		96800000	82300000	39100000	66900000				71200000	58100000	71400000	84300000	67800000			97300000	74100000	51400000	52400000	65400000	59200000	85500000	56200000	42200000
One-way ANOVA
Uncorrected Fisher's LSD	Mean Diff,	95,00% CI of diff,	Below threshold?	Summary	Individual P Value
CTRL iEκ+/T vs. B-KO iEκ+/T	20175000	-309976 to 40659976	No	ns	0.0532	A-B
CTRL iEκ+/T vs. CTRL iEκT/T	20000	-19196611 to 19236611	No	ns	0.9983	A-C
CTRL iEκ+/T vs. B-KO iEκT/T	20100000	2444171 to 37755829	Yes	*	0.0279	A-D
B-KO iEκ+/T vs. CTRL iEκT/T	-20155000	-41443612 to 1133612	No	ns	0.0621	B-C
B-KO iEκ+/T vs. B-KO iEκT/T	-75000	-19966082 to 19816082	No	ns	0.9938	B-D
CTRL iEκT/T vs. B-KO iEκT/T	20080000	1497776 to 38662224	Yes	*	0.0357	C-D

## Sheet: Figure 3C
	CTRL iEκ+/T							B-KO iEκ+/T							CTRL iEκT/T							B-KO iEκT/T
B220+	19094400	21488000	6051200	26600000		26910400	15719300	11534500	13112400				19081600	11678100	20991600	23604000	21831600			22281700	13041600	11616400	15929600	16088400	11248000	18895500	12869800	8946400
One way ANOVA
Uncorrected Fisher's LSD	Mean Diff,	95,00% CI of diff,	Below threshold?	Summary	Individual P Value
CTRL iEκ+/T vs. B-KO iEκ+/T	5458900	-1573410 to 12491210	No	ns	0.1203	A-B
CTRL iEκ+/T vs. CTRL iEκT/T	-1039550	-7636441 to 5557341	No	ns	0.7444	A-C
CTRL iEκ+/T vs. B-KO iEκT/T	5654250	-406839 to 11715339	No	ns	0.0657	A-D
B-KO iEκ+/T vs. CTRL iEκT/T	-6498450	-13806641 to 809741	No	ns	0.0781	B-C
B-KO iEκ+/T vs. B-KO iEκT/T	195350	-6633081 to 7023781	No	ns	0.9527	B-D
CTRL iEκT/T vs. B-KO iEκT/T	6693800	314688 to 13072912	Yes	*	0.0407	C-D

## Sheet: Figure 3D
	CTRL iEκ+/T							B-KO iEκ+/T							CTRL iEκT/T							B-KO iEκT/T
pre pro	1.38682e+07	1.53524e+07	4.00308e+06	18001649		9.6286e+06	1.93923e+07	8.71475e+06	9.47985e+06				1.01944e+07	7.84954e+06	1.81624e+07	1.76757e+07	1.78409e+07			1.02546e+07	1.56927e+07	1.14784e+07	1.38195e+07	1.45003e+07	9.64586e+06	1.6496e+07	1.13272e+07	8.00847e+06
one way ANOVA
Uncorrected Fisher's LSD	Mean Diff,	95,00% CI of diff,	Below threshold?	Summary	Individual P Value
CTRL iEκ+/T vs. B-KO iEκ+/T	4314738	-862863 to 9492340	No	ns	0.097	A-B
CTRL iEκ+/T vs. CTRL iEκT/T	-2550906	-7407926 to 2306115	No	ns	0.2844	A-C
CTRL iEκ+/T vs. B-KO iEκT/T	1192133	-3270398 to 5654664	No	ns	0.5816	A-D
B-KO iEκ+/T vs. CTRL iEκT/T	-6865644	-12246365 to -1484923	Yes	*	0.0153	B-C
B-KO iEκ+/T vs. B-KO iEκT/T	-3122606	-8150100 to 1904889	No	ns	0.2084	B-D
CTRL iEκT/T vs. B-KO iEκT/T	3743038	-953640 to 8439717	No	ns	0.1114	C-D

## Sheet: Figure 3E
	CTRL iEκ+/T							B-KO iEκ+/T							CTRL iEκT/T							B-KO iEκT/T
IgM+	5.38462e+06	4598432	1.16788e+06	5612600		5.62427e+06	3929825	2.9413e+06	2.15043e+06				3.26295e+06	2685963	2.70792e+06	3280956	1.50638e+06			1.73797e+06	991162	220712	254874	305680	168720	151164	244526	98410.4
One way ANOVA
Uncorrected Fisher's LSD	Mean Diff,	95,00% CI of diff,	Below threshold?	Summary	Individual P Value
CTRL iEκ+/T vs. B-KO iEκ+/T	1626110	240181 to 3012040	Yes	*	0.024	A-B
CTRL iEκ+/T vs. CTRL iEκT/T	2341395	1041277 to 3641512	Yes	**	0.0014	A-C
CTRL iEκ+/T vs. B-KO iEκT/T	4179974	2985453 to 5374495	Yes	****	<0,0001	A-D
B-KO iEκ+/T vs. CTRL iEκT/T	715285	-725016 to 2155585	No	ns	0.3106	B-C
B-KO iEκ+/T vs. B-KO iEκT/T	2553864	1208115 to 3899613	Yes	***	0.0009	B-D
CTRL iEκT/T vs. B-KO iEκT/T	1838579	581382 to 3095777	Yes	**	0.0066	C-D

## Sheet: Figure 3F
	CTRL iEκ+/T							B-KO iEκ+/T							CTRL iEκT/T							B-KO iEκT/T
immature	3.98381e+06	3.27197e+06	503547	4314835		2.17666e+06	4700124	2.21832e+06	1.54034e+06				5.43439e+06	2.00229e+06	1.65608e+06	2.10599e+06	1.22848e+06			765200	1.40612e+06	190600	271528	251778	113353	196079	242442	136461
mature	1.99291e+06	2.34075e+06	1.2971e+06	3622363		2.72192e+06	3.95263e+06	1.15489e+06	1.08665e+06				1.56754e+06	1.21767e+06	1.01042e+06	1.53982e+06	804313			809231	1.28232e+06	43532.2	69659	84919.3	57169.4	72684.4	34967.6	11508.8
2-way ANOVA
Uncorrected Fisher's LSD	Predicted (LS) mean diff,	95,00% CI of diff,	Below threshold?	Summary	Individual P Value
immature
CTRL iEκ+/T vs. B-KO iEκ+/T	359657	-804881 to 1524195	No	ns	0.535
CTRL iEκ+/T vs. CTRL iEκT/T	1726118	633684 to 2818552	Yes	**	0.0028
CTRL iEκ+/T vs. B-KO iEκT/T	2958171	1954465 to 3961877	Yes	****	<0,0001
B-KO iEκ+/T vs. CTRL iEκT/T	1366461	156237 to 2576684	Yes	*	0.028
B-KO iEκ+/T vs. B-KO iEκT/T	2598514	1467738 to 3729290	Yes	****	<0,0001
CTRL iEκT/T vs. B-KO iEκT/T	1232053	175683 to 2288423	Yes	*	0.0235
mature
CTRL iEκ+/T vs. B-KO iEκ+/T	1397925	233386 to 2562463	Yes	*	0.02
CTRL iEκ+/T vs. CTRL iEκT/T	1565393	472959 to 2657827	Yes	**	0.0062
CTRL iEκ+/T vs. B-KO iEκT/T	2601122	1597416 to 3604828	Yes	****	<0,0001
B-KO iEκ+/T vs. CTRL iEκT/T	167468	-1042755 to 1377692	No	ns	0.7806
B-KO iEκ+/T vs. B-KO iEκT/T	1203197	72421 to 2333974	Yes	*	0.0377
CTRL iEκT/T vs. B-KO iEκT/T	1035729	-20641 to 2092099	No	ns	0.0544

## Sheet: Figure 3G
	CTRL iEκ+/T							B-KO iEκ+/T							CTRL iEκT/T							B-KO iEκT/T
kappa+	3532464	3695936	1.08316e+06	4841200		4843872	3.03382e+06	2560659	2.13732e+06				2957648	2.58086e+06	20991.6	23604	21831.6			44563.4	26083.2	11616.4	31859.2	16088.4	33744	37791	12869.8	8946.4
One way ANOVA
Uncorrected Fisher's LSD	Mean Diff,	95,00% CI of diff,	Below threshold?	Summary	Individual P Value
CTRL iEκ+/T vs. B-KO iEκ+/T	945955	-66921 to 1958831	No	ns	0.0654	A-B
CTRL iEκ+/T vs. CTRL iEκT/T	3477662	2527500 to 4427824	Yes	****	<0,0001	A-C
CTRL iEκ+/T vs. B-KO iEκT/T	3483232	2610243 to 4356221	Yes	****	<0,0001	A-D
B-KO iEκ+/T vs. CTRL iEκT/T	2531707	1479096 to 3584319	Yes	****	<0,0001	B-C
B-KO iEκ+/T vs. B-KO iEκT/T	2537277	1553766 to 3520788	Yes	****	<0,0001	B-D
CTRL iEκT/T vs. B-KO iEκT/T	5570	-913225 to 924365	No	ns	0.99	C-D

## Sheet: Figure 3H
	CTRL iEκ+/T							B-KO iEκ+/T							CTRL iEκT/T							B-KO iEκT/T
lambda+	1.29842e+06	1117376	290458	1436400		1.45316e+06	1.14751e+06	80741.5	52449.6				76326.4	70068.6	2.33007e+06	3186540	1.76836e+06			2.51783e+06	1434576	209095	366381	353945	202464	340119	321745	187874
One way ANOVA
Uncorrected Fisher's LSD	Mean Diff,	95,00% CI of diff,	Below threshold?	Summary	Individual P Value
CTRL iEκ+/T vs. B-KO iEκ+/T	1053991	517018 to 1590964	Yes	***	0.0006	A-B
CTRL iEκ+/T vs. CTRL iEκT/T	-1123588	-1627313 to -619863	Yes	***	0.0002	A-C
CTRL iEκ+/T vs. B-KO iEκT/T	840798	377986 to 1303611	Yes	**	0.0013	A-D
B-KO iEκ+/T vs. CTRL iEκT/T	-2177579	-2735617 to -1619540	Yes	****	<0,0001	B-C
B-KO iEκ+/T vs. B-KO iEκT/T	-213193	-734598 to 308213	No	ns	0.4016	B-D
CTRL iEκT/T vs. B-KO iEκT/T	1964386	1477290 to 2451482	Yes	****	<0,0001	C-D

## Sheet: Figure 3J
	CTRL iEκ+/T							B-KO iEκ+/T							CTRL iEκT/T							B-KO iEκT/T
total sp	116000000	138000000	57800000	125000000		142000000	168000000	105000000	101000000				116000000	62500000	102000000	102000000	125000000			114000000	125000000	52700000	74600000	43100000	114000000	60600000	20300000	22400000
One Way ANOVA
Uncorrected Fisher's LSD	Mean Diff,	95,00% CI of diff,	Below threshold?	Summary	Individual P Value
CTRL iEκ+/T vs. B-KO iEκ+/T	28341667	-11284981 to 67968314	No	ns	0.1503	A-B
CTRL iEκ+/T vs. CTRL iEκT/T	10866667	-26306423 to 48039757	No	ns	0.5468	A-C
CTRL iEκ+/T vs. B-KO iEκT/T	69080952	34927078 to 103234827	Yes	***	0.0005	A-D
B-KO iEκ+/T vs. CTRL iEκT/T	-17475000	-58656220 to 23706220	No	ns	0.3844	B-C
B-KO iEκ+/T vs. B-KO iEκT/T	40739286	2261482 to 79217090	Yes	*	0.0392	B-D
CTRL iEκT/T vs. B-KO iEκT/T	58214286	22268370 to 94160201	Yes	**	0.0032	C-D

## Sheet: Figure 3K
	CTRL iEκ+/T							B-KO iEκ+/T							CTRL iEκT/T							B-KO iEκT/T
B220+	53940000	56580000	15779400	39750000		44730000	59808000	53130000	36259000				49764000	18375000	32334000	21216000	29375000			28044000	24750000	7905000	9548800	4870300	9918000	6060000	1664600	1388800
One way ANOVA
Uncorrected Fisher's LSD	Mean Diff,	95,00% CI of diff,	Below threshold?	Summary	Individual P Value
CTRL iEκ+/T vs. B-KO iEκ+/T	5715900	-9307447 to 20739247	No	ns	0.4345	A-B
CTRL iEκ+/T vs. CTRL iEκT/T	17954100	3860952 to 32047248	Yes	*	0.0154	A-C
CTRL iEκ+/T vs. B-KO iEκT/T	39189971	26241475 to 52138468	Yes	****	<0,0001	A-D
B-KO iEκ+/T vs. CTRL iEκT/T	12238200	-3374520 to 27850920	No	ns	0.1169	B-C
B-KO iEκ+/T vs. B-KO iEκT/T	33474071	18886277 to 48061866	Yes	***	0.0001	B-D
CTRL iEκT/T vs. B-KO iEκT/T	21235871	7607972 to 34863770	Yes	**	0.0042	C-D

## Sheet: Figure 3L
	CTRL iEκ+/T							B-KO iEκ+/T							CTRL iEκT/T							B-KO iEκT/T
IgM+	51836340	54882600	1.48958e+07	38239500		43030260	57654912	52014270	35207489				48022260	17309250	30232290	19858176	27583125			26080920	22497750	6940590	8116480	4.34431e+06	7507926	5029800	1.27175e+06	897165
One way ANOVA
Uncorrected Fisher's LSD	Mean Diff,	95,00% CI of diff,	Below threshold?	Summary	Individual P Value
CTRL iEκ+/T vs. B-KO iEκ+/T	5284910	-9351126 to 19920946	No	ns	0.4579	A-B
CTRL iEκ+/T vs. CTRL iEκT/T	18172775	4442957 to 31902594	Yes	*	0.0123	A-C
CTRL iEκ+/T vs. B-KO iEκT/T	38550653	25935976 to 51165329	Yes	****	<0,0001	A-D
B-KO iEκ+/T vs. CTRL iEκT/T	12887865	-2322350 to 28098080	No	ns	0.0919	B-C
B-KO iEκ+/T vs. B-KO iEκT/T	33265743	19054030 to 47477455	Yes	***	0.0001	B-D
CTRL iEκT/T vs. B-KO iEκT/T	20377878	7101314 to 33654441	Yes	**	0.0047	C-D

[truncated: 5 more sheets: Figure 3M, Figure 3N, Figure 3O, Figure 3P, Figure 3Q]
