# Supplementary material for: Kidins220 regulates the development of B cells bearing the λ light chain
Source: eLife. 2024 Jan 25;13:e83943. doi: 10.7554/eLife.83943 (PMC10810608; doi:10.7554/eLife.83943)
Supplement: Figure 4—figure supplement 1—source data 1. [file elife-83943-fig4-figsupp1-data1.xlsx]

## Sheet: Figure 4-figure supplement 1A
apoptotic
		CTRL					B-KO
	pro	3.56		6.48	11.01	9.46	6.54	5.8	5.23	5.68	3.62
	large pre	3.15		5.11	6.09	5.29	5.13	3.78	7.2	7.24	6.33
	small pre	0.52		1.07	1.31	1.4	1.22	0.57	2.61	1.99	1.93
	kappa+	3.37		6.4	7.68	6.13	8.71	3.73	9.9	9.09	10.18
	lambda+	2.42		4.83	4.62	3.59	4.8	0.78	4.65	3.45	7.83
2way ANOVA
Uncorrected Fisher's LSD	Predicted (LS) mean diff,	95,00% CI of diff,	Below threshold?	Summary	Individual P Value
CTRL - B-KO
pro	2.254	-0,2787 to 4,786	No	ns	0.0794
large pre	-1.026	-3,558 to 1,506	No	ns	0.4163
small pre	-0.589	-3,121 to 1,943	No	ns	0.6397
kappa+	-2.427	-4,959 to 0,1052	No	ns	0.0597
lambda+	-0.437	-2,969 to 2,095	No	ns	0.7282
dead
		CTRL					B-KO
	pro	1.31		4.35	6.48	5.66	1.38	1.56	2.28	2.42	2.36
	large pre	3.26		3.7	3.33	3.39	2.52	1.59	3.92	3.83	6.71
	small pre	0.52		0.28	0.34	0.25	0.36	0.25	0.49	0.27	0.49
	kappa+	0.98		1.87	1.72	1.4	1.12	0.96	2.06	1.78	2.62
	lambda+	1.29		1.34	1.02	0.53	3.2	1.55	2.91	2.96	3.04
2way ANOVA
Uncorrected Fisher's LSD	Predicted (LS) mean diff,	95,00% CI of diff,	Below threshold?	Summary	Individual P Value
CTRL - B-KO
pro	2.45	1,066 to 3,834	Yes	***	0.001
large pre	-0.294	-1,678 to 1,090	No	ns	0.6689
small pre	-0.0245	-1,408 to 1,359	No	ns	0.9715
kappa+	-0.2155	-1,599 to 1,168	No	ns	0.7538
lambda+	-1.687	-3,071 to -0,3033	Yes	*	0.0183

## Sheet: Figure 4-figure supplement 1B
	CTRL			B-KO
non-B	94.1	104	49.3	99.2	123	45.7
pro B cells	1350	1398	1618	1401	1444	1549
large pre B cells	1177	1073	1228	1243	1322	1198
small pre B cells	392	342	382	417	451	402
immature B cells	267	207	287	386	203	311
mature B cells	131	141	145	188	158	185
2way ANOVA
Uncorrected Fisher's LSD	Mean Diff,	95,00% CI of diff,	Below threshold?	Summary	Individual P Value
CTRL - B-KO
non-B	-6.833	-116,3 to 102,7	No	ns	0.8986
pro B cells	-9.333	-118,8 to 100,2	No	ns	0.8618
large pre B cells	-95	-204,5 to 14,50	No	ns	0.086
small pre B cells	-51.33	-160,8 to 58,17	No	ns	0.3429
immature B cells	-46.33	-155,8 to 63,17	No	ns	0.3911
mature B cells	-38	-147,5 to 71,50	No	ns	0.4808

## Sheet: Figure 4-figure supplement 1C
pAKT
		CTRL			B-KO
	non-B	4.78231	5.31973	4.72109	4.89796	4.45578	4.43537
	pro B cells	4.80147	4.30147	4.44853	5.61765	5.60294	5.83088
	pre B cells	4.69811	4.10377	4.07547	4.89623	5.17924	5.17924
2way ANOVA
Uncorrected Fisher's LSD	Mean Diff,	95,00% CI of diff,	Below threshold?	Summary	Individual P Value
CTRL - B-KO
HSC	0.3447	-0,1200 to 0,8094	No	ns	0.1321
pro B cells	-1.167	-1,631 to -0,7019	Yes	***	0.0001
pre B cells	-0.7925	-1,257 to -0,3277	Yes	**	0.003
pFOXO1
		CTRL			B-KO
	non-B	5.24632	5.33824	4.66912	5.48162	5.08456	4.46324
	pro B cells	8.33636	7.89091	8.17273	10.7	11.3364	9.37273
	pre B cells	9.2928	9.04467	8.79653	12.2457	11.8114	10.4591
2way ANOVA
Uncorrected Fisher's LSD	Mean Diff,	95,00% CI of diff,	Below threshold?	Summary	Individual P Value
CTRL - B-KO
HSC	0.07475	-1,046 to 1,195	No	ns	0.8868
pro B cells	-2.336	-3,457 to -1,216	Yes	***	0.0007
pre B cells	-2.461	-3,581 to -1,340	Yes	***	0.0004
