# Supplementary material for: Kidins220 regulates the development of B cells bearing the λ light chain
Source: eLife. 2024 Jan 25;13:e83943. doi: 10.7554/eLife.83943 (PMC10810608; doi:10.7554/eLife.83943)
Supplement: Figure 4—source data 1. [file elife-83943-fig4-data1.xlsx]

## Sheet: Figure 4B
	CTRL pMIG												B-KO pMIG												CTRL+BCL2												B-KO+BCL2
d0	88.65	84.31	72.35	77.22	82.34	77.59	85.58						90.32	80.53	82.02			85.1	84.38						80.85	72.29	94.65	89.46	90.67		84.3	78.43	82.22	77.97	62.99	75.25	81.44	76.36	87.89	87.95	87.1	88.98	81.35	82.97			77.89	77.15
d1	83.58	89.84	67.34	86.28	88.96	91.77	93.62						88.39	81.33	85.41			95.3	93.71						84.69	84.9	94.68	88.31	92.35		90.68	84.05	89.4	86.96	86.99	90.64	85.63	85.5	87.55	88.03	85.64	90.2	85.01	87.47			91.29	91.4
d2	92.46	90.49	81.93	91.3		93.96	93.5						90.22	77.26	83.47			91.31	86.52						84.09	88.51	96.18	96.01	96.78		91.1	90.39	90.77		94.5	96.13	87.68	86.48	93.97	93.05	92.37	93.38	82.63	81.52			93.58	93.17
d3	91.11	84.44	43.94	68.97	88.61	92.49	85.31						87.45	46.15	72.75			71.73	60.83						93.15	92.83	96.52	95.72	97.21		90.17	81.81	87.79	90.18	93.03	93.84	83.7	87.34	93.47	91.52	91.62	92.79	77.22	80.03			91.42	90.04
d4	81.95	76.03	31.83	57.59	81.37	84.52	50.67						74.07	17.95	49.59			23.39	9.14						94.05	95.08	96.2	95.75	96.68		82.03	74.93	82.63	83.32	92.79	94.36	80.21	89.32	91.38	88.77	90.28	90.16	62.19	66.57			89.51	89.12
d5						63.42	19.49											3.53	4.15							94.11	95.12	94.48	96.21		82.15	77.25	82.73	84.89	92.3	92.61		86.41	91.04	87.43	88.92	89.78	65.04	63.05			88.23	85.67
d6																										91.27	95.08	94.66	95.2		86.51	82.05	85.57	88.06	93.64	95.85		83.95	90.32	88.2	87.55	88.07	75.26	71.53			89.8	88.56
d7																									92.43	90.4	92.07	94.69	94.08		88.65	83.35	85.5	86.78	91.83	95.68	75.59	83.62	90.54	87.95	88.25	89.81	70.64	64.64			89.64	88.34
d8																										90.57	89.8	93.05	92.67		79.93	73.1	76.14	81.04	90.51	95.7		81.86	91.14	88.3	88.75	89.39	63.22	58.78			91.12	90.19
d9																										90.55	91	93.75	92.25		90.95	85.57	87.05	86.42				77.54	91.18	88.63	88.25	90.05	80.28	76.98
2way ANOVA
Uncorrected Fisher's LSD	Predicted (LS) mean diff,	95,00% CI of diff,	Below threshold?	Summary	Individual P Value
CTRL pMIG - B-KO pMIG
d0	-3.321	-19,82 to 13,18	No	ns	0.6878
d1	-2.915	-19,42 to 13,58	No	ns	0.7243
d2	4.851	-12,21 to 21,91	No	ns	0.5707
d3	11.49	-5,015 to 27,99	No	ns	0.1683
d4	31.45	14,95 to 47,95	Yes	***	0.0004
d5	37.62	9,436 to 65,79	Yes	**	0.0099
Uncorrected Fisher's LSD	Predicted (LS) mean diff,	95,00% CI of diff,	Below threshold?	Summary	Individual P Value
CTRL+BCL2 - B-KO+BCL2
d0	-2.083	-8,104 to 3,939	No	ns	0.4958
d1	0.7416	-5,280 to 6,763	No	ns	0.8082
d2	2.663	-3,501 to 8,827	No	ns	0.395
d3	4.108	-1,914 to 10,13	No	ns	0.18
d4	6.051	0,02901 to 12,07	Yes	*	0.0489
d5	6.344	0,01148 to 12,68	Yes	*	0.0496
d6	5.985	-0,3479 to 12,32	No	ns	0.0638
d7	7.594	1,573 to 13,62	Yes	*	0.0137
d8	3.723	-2,609 to 10,06	No	ns	0.2475
d9	4.991	-2,142 to 12,12	No	ns	0.1691

## Sheet: Figure 4C
Igk
		CTRL+BCL2										B-KO+BCL2
	d0	1.39	1.26	1.45	1.51	1.15		1.15	0.6	0.75	0.75	0.58	1.15	1.41	1.7	2.48	1.62	1.3	1.93
	d1	3.65	1.32	1.37	1.11	0.82		0.85	0.47	0.7	0.73	1.99	1.32	0.95	1.17	1.75	1.28	1.36	2.03
	d2	3.03	1.9	1.92	2.28	1.35		1.41	1.21	1.52		1.99	1.87	1.6	1.99	2.39	1.93	1.82	2.08
	d3	3.7	2.37	2.33	2.81	1.58		1.81	1.24	1.58	2.42	3.35	2.27	2.06	2.69	2.79	2.33	2.65	3.24
	d4	2.47	3.17	1.95	2.35	1.51		1.42	1.37	1.67	2.2	3.39	4.01	2.07	2.75	2.7	2.32	2.29	2.76
	d5		4.32	2.85	3.47	2.09		2.68	2.62	3.15	2.88		3.9	3.03	4.01	3.93	3.05	3.65	4.51
	d6		3.6	2.69	3.32	2		2.82	2.81	2.95	3.33		3.49	3.04	4.06	4.07	2.69	4.01	5.29
	d7	3.62	3.6	2.62	3.2	1.77		2.86	2.63	2.89	2.87	5.37	3.76	3.04	4.06	4.07	2.69	3.7	4.59
	d8		4.09	2.49	3.46	1.91		2.05	2.24	1.91	2.19		4.27	2.83	3.47	3.35	2.57	4.02	4.95
	d9		4.87	2.66	3.44	1.83		3.98	4.83	4.73	5.53		4.07	2.9	3.91	4.03	2.63
2way ANOVA
Uncorrected Fisher's LSD	Predicted (LS) mean diff,	95,00% CI of diff,	Below threshold?	Summary	Individual P Value
CTRL+BCL2 - B-KO+BCL2
d0	-0.409	-1,072 to 0,2536	No	ns	0.2244
d1	-0.2568	-0,9195 to 0,4059	No	ns	0.4448
d2	-0.1313	-0,8131 to 0,5506	No	ns	0.7041
d3	-0.4681	-1,131 to 0,1946	No	ns	0.1648
d4	-0.774	-1,437 to -0,1114	Yes	*	0.0224
d5	-0.7182	-1,424 to -0,01241	Yes	*	0.0462
d6	-0.8671	-1,573 to -0,1613	Yes	*	0.0164
d7	-1.014	-1,677 to -0,3518	Yes	**	0.0029
d8	-1.095	-1,800 to -0,3888	Yes	**	0.0026
d9	0.4758	-0,3017 to 1,253	No	ns	0.2284
Igl
		CTRL+BCL2										B-KO+BCL2
	d0	0.36	0.35	0.64	0.49	0.59		0.33	0.26	0.28	0.16	0.07	0.16	0.24	0.23	0.46	0.24	0.12	0.16
	d1	1.08	0.66	0.59	0.56	0.45		0.29	0.14	0.19	0.16	0.39	0.4	0.18	0.17	0.33	0.23	0.07	0.14
	d2	1.02	0.94	1.01	0.84	0.71		0.32	0.33	0.29		0.15	0.78	0.23	0.28	0.49	0.3	0.14	0.29
	d3	1.29	0.73	1.29	1.29	1.22		0.78	0.49	0.71	0.71	0.27	0.38	0.29	0.4	0.65	0.5	0.27	0.49
	d4	1.76	0.81	1.79	2.13	1.73		0.86	0.54	0.8	1.3	0.43	0.56	0.54	0.7	1.04	0.68	0.35	0.41
	d5		1.22	2.78	3.26	2.63		1.52	1.03	1.31	2.1		0.75	1.22	1.33	1.79	0.93	0.61	1.12
	d6		1.69	3.32	3.67	3.64		1.22	0.82	0.91	2.05		0.81	1.5	1.64	2.41	1.58	0.63	1.01
	d7	3.96	1.84	2.84	3.33	3.29		1.56	1.05	1.17	2.21	1.75	1.2	1.5	1.64	2.41	1.58	0.86	1.16
	d8		2.15	2.19	2.88	2.39		1.4	1.08	1.22	2.4		1.71	1.75	1.63	2.42	1.44	1.38	1.69
	d9		1.82	2.51	3	3.05		3.07	1.85	2.24	3.74		1.5	1.65	1.81	2.83	1.4
2way ANOVA
Uncorrected Fisher's LSD	Predicted (LS) mean diff,	95,00% CI of diff,	Below threshold?	Summary	Individual P Value
CTRL+BCL2 - B-KO+BCL2
d0	0.1744	-0,3579 to 0,7068	No	ns	0.5181
d1	0.219	-0,3133 to 0,7513	No	ns	0.4173
d2	0.35	-0,1977 to 0,8977	No	ns	0.2086
d3	0.5393	0,006993 to 1,072	Yes	*	0.0471
d4	0.7135	0,1812 to 1,246	Yes	**	0.009
d5	0.8741	0,3071 to 1,441	Yes	**	0.0028
d6	0.7964	0,2295 to 1,363	Yes	**	0.0062
d7	0.8486	0,3163 to 1,381	Yes	**	0.002
d8	0.2466	-0,3204 to 0,8136	No	ns	0.3913
d9	0.822	0,1975 to 1,447	Yes	*	0.0103

## Sheet: Figure 4D
Igk GL
		CTRL+BCL2				B-KO+BCL2
	d0	0.226	0.165	0.154		0.101	0.121	0.218	0.199
	d1	0.622	0.324	0.495		0.299	0.28	0.205	0.57
	d2	0.41	0.266	0.376		0.255	0.284	0.38	0.454
	d3	0.209	0.196	0.171		0.259		0.12	0.276
	d4	0.23	0.19	0.08		0.34	0.18	0.2	0.14
	d5	0.09	0.1	0.08		0.25	0.1	0.08	0.07
	d6	0.24	0.15	0.15		0.15	0.15	0.25	0.13
	d7	0.21	0.25	0.19		0.16	0.26	0.13	0.13
	d8	0.21	0.08	0.15		0.18	0.11	0.11	0.13
	d9	0.19	0.21	0.33		0.17	0.19	0.2	0.11
2way ANOVA
Uncorrected Fisher's LSD	Predicted (LS) mean diff,	95,00% CI of diff,	Below threshold?	Summary	Individual P Value
CTRL+BCL2 - B-KO+BCL2
d0	0.02192	-0,09767 to 0,1415	No	ns	0.7142
d1	0.1418	0,02224 to 0,2614	Yes	*	0.0211
d2	0.007417	-0,1122 to 0,1270	No	ns	0.9013
d3	-0.02633	-0,1542 to 0,1015	No	ns	0.6807
d4	-0.04833	-0,1679 to 0,07126	No	ns	0.4206
d5	-0.035	-0,1546 to 0,08459	No	ns	0.5591
d6	0.01	-0,1096 to 0,1296	No	ns	0.8672
d7	0.04667	-0,07292 to 0,1663	No	ns	0.4367
d8	0.01417	-0,1054 to 0,1338	No	ns	0.8128
d9	0.07583	-0,04376 to 0,1954	No	ns	0.2086
Igl GL
		CTRL+BCL2					B-KO+BCL2
	d0	0.02	0.09	0.05	0.05		0	0.01	0.01	0.04	0.02
	d1	0.08	0.29	0.11	0.1		0.01	0.03	0.04	0.06	0.05
	d2	0.31	1.25	0.66	0.96		0.04	0.13	0.18	0.44	0.42
	d3	0.73	2.54	1.87	0.8		0.27	0.45	0.29	0.35	0.42
	d4		2.08	1.76	1.33		0.25	0.42	0.46	1.03	0.44
	d5		1.36	2.86	1.23			0.69	0.75	0.79	0.7
	d6		1.95	0.96	1.39			0.73	0.65	0.95	1.1
	d7	0.89		1.67	1.17		0.48	0.84	1.47	0.91	0.93
	d8		1.26	1.59	1.04			0.81	0.97	0.77	0.86
	d9		1.4	1.34	1.45			0.77	0.78	0.9	1.64
2way ANOVA
Uncorrected Fisher's LSD	Predicted (LS) mean diff,	95,00% CI of diff,	Below threshold?	Summary	Individual P Value
CTRL+BCL2 - B-KO+BCL2
d0	0.0365	-0,4345 to 0,5075	No	ns	0.8773
d1	0.107	-0,3640 to 0,5780	No	ns	0.6512
d2	0.553	0,08197 to 1,024	Yes	*	0.0222
d3	1.129	0,6580 to 1,600	Yes	****	<0,0001
d4	1.203	0,6905 to 1,716	Yes	****	<0,0001
d5	1.084	0,5479 to 1,620	Yes	***	0.0002
d6	0.5758	0,03954 to 1,112	Yes	*	0.0358
d7	0.3173	-0,1955 to 0,8301	No	ns	0.2206
d8	0.4442	-0,09212 to 0,9805	No	ns	0.1028
d9	0.3742	-0,1621 to 0,9105	No	ns	0.168

## Sheet: Figure 4E
E12
		CTRL					B-KO
	d0	0.0437371	0.179396	0.129735	0.149042		0.0454366	0.11475	0.119666	0.240686	0.172307
	d1	0.154964	0.476839	0.736132	0.829039		0.205898	0.305223	0.450825	0.372279	0.758373
	d2	0.335643	0.57307	0.922873	0.904282		0.25437	0.378945	0.459976	0.509298	0.774704
	d3	0.32197	0.654035	0.202414	0.157927		0.270744	0.416848	0.322897	0.21386	0.384485
	d4	0.245705	0.359165	0.384848	0.350634		0.193446	0.489699	0.446243	1.06503	0.459902
	d5		0.573592	0.520655	0.44113			0.378451	0.183346	0.494166	0.162082
	d6		0.33457	0.310668	0.420777			0.269078	0.343922		0.333424
	d7	0.233258	0.520555	0.316063	0.376879		0.140146	0.142078	0.299942	0.176247	0.163282
2way ANOVA
Uncorrected Fisher's LSD	Predicted (LS) mean diff,	95,00% CI of diff,	Below threshold?	Summary	Individual P Value
CTRL - B-KO
d0	-0.01309	-0,2538 to 0,2277	No	ns	0.9135
d1	0.1307	-0,1100 to 0,3715	No	ns	0.2808
d2	0.2085	-0,03224 to 0,4493	No	ns	0.0881
d3	0.01232	-0,2284 to 0,2531	No	ns	0.9186
d4	-0.1958	-0,4365 to 0,04497	No	ns	0.1087
d5	0.2073	-0,06682 to 0,4814	No	ns	0.1351
d6	0.03986	-0,2532 to 0,3329	No	ns	0.7859
d7	0.1774	-0,06339 to 0,4181	No	ns	0.1453
E47
		CTRL					B-KO
	d0	0.250868	0.86118	0.625328	0.75679		0.249135	0.80635	0.629503	1.06567	0.899646
	d1	0.907519	2.21161	2.39078	2.98221		1.13288	1.77499	1.91337	1.9528	2.91358
	d2	1.92519	2.43954	3.18684	3.51069		1.55294	1.00216	1.96238	1.91369	2.55933
	d3	1.76541	3.66735	0.483476	0.495544		1.23971	1.74442	1.60122	0.556667	1.78053
	d4	1.45902	1.96284	1.61192	1.98873		0.989657	1.5977	1.78388	2.25157	1.83888
	d5		3.26633	3.47839	2.39652			1.66366	1.05861	2.40052	0.693261
	d6		2.25623	2.28971	3.35192			1.62545	1.6216	1.48672	0.994857
	d7	1.44393	2.75136	2.08891	2.1138		0.673617	1.20874	1.27092	1.02725	0.250304
2way ANOVA
Uncorrected Fisher's LSD	Predicted (LS) mean diff,	95,00% CI of diff,	Below threshold?	Summary	Individual P Value
CTRL - B-KO
d0	-0.1065	-0,9659 to 0,7529	No	ns	0.8046
d1	0.1855	-0,6739 to 1,045	No	ns	0.6667
d2	0.9675	0,1081 to 1,827	Yes	*	0.0281
d3	0.2184	-0,6409 to 1,078	No	ns	0.6122
d4	0.06329	-0,7961 to 0,9227	No	ns	0.8831
d5	1.593	0,6146 to 2,572	Yes	**	0.0019
d6	1.2	0,2220 to 2,179	Yes	*	0.0172
d7	1.213	0,3540 to 2,073	Yes	**	0.0065
Rag1
		CTRL					B-KO
	d0	0.02	0.0737282	0.0453847	0.0336475		0.03	0.0415681	0.0784235	0.0937702	0.120677
	d1	0.25	0.201434	0.140275	0.111163		0.37	0.295599	0.547938	0.293075	0.528077
	d2	0.87	0.679213	0.721266	0.503906		0.76	0.540641	0.984923	0.659885	0.389568
	d3	0.58	1.18613	1.13182	0.758478		0.36	1.61955	0.787685	0.517522	0.716393
	d4	0.42	0.751382	1.06795	0.687584		0.23	0.805162	0.921251	1.58782	1.17454
	d5		0.932992	1.94268	0.962066			0.902799	0.787024	1.51571	0.338911
	d6		0.739472	1.50388	0.756659			1.06768	0.822454		0.940803
	d7	0.23	0.764969	0.862153	1.01277		0.16	0.549265	1.14639	0.844507	0.311331
2way ANOVA
Uncorrected Fisher's LSD	Predicted (LS) mean diff,	95,00% CI of diff,	Below threshold?	Summary	Individual P Value
CTRL - B-KO
d0	-0.0297	-0,4733 to 0,4139	No	ns	0.8936
d1	-0.2312	-0,6748 to 0,2124	No	ns	0.3003
d2	0.02659	-0,4170 to 0,4702	No	ns	0.9047
d3	0.1139	-0,3297 to 0,5575	No	ns	0.6085
d4	-0.212	-0,6556 to 0,2316	No	ns	0.3418
d5	0.3931	-0,1119 to 0,8982	No	ns	0.1243
d6	0.05636	-0,4836 to 0,5963	No	ns	0.8349
d7	0.1152	-0,3284 to 0,5588	No	ns	0.6045
Rag2
		CTRL					B-KO
	d0	0.05	0.0557909	0.0532743	0.0639194		0.04	0.0385592	0.0574529	0.0391493	0.0704251
	d1	0.54	0.532673	0.460474	0.524076		0.53	0.50341	0.561246	0.295533	0.527815
	d2	0.74	0.296572	0.520742	0.371654		0.44	0.450938	0.29849	0.202543	0.212299
	d3	0.48	0.255294	0.241602	0.230384		0.2	0.206539	0.177163	0.0483054	0.160406
	d4	0.34	0.138797	0.257186	0.200354		0.11	0.201037	0.0809435	0.153488	0.0837672
	d5		0.282458	0.290667	0.222219			0.13996	0.0797741	0.143759	0.08791
	d6		0.214099	0.185148	0.156575			0.0637356	0.121366		0.0386277
	d7	0.16	0.132358	0.122506	0.172301		0.04	0.165562	0.132144	0.148566	0.127276
Uncorrected Fisher's LSD	Predicted (LS) mean diff,	95,00% CI of diff,	Below threshold?	Summary	Individual P Value
CTRL - B-KO
d0	0.006629	-0,1028 to 0,1161	No	ns	0.9037
d1	0.03071	-0,07876 to 0,1402	No	ns	0.5758
d2	0.1614	0,05192 to 0,2709	Yes	**	0.0047
d3	0.1433	0,03387 to 0,2528	Yes	*	0.0113
d4	0.1082	-0,001230 to 0,2177	No	ns	0.0525
d5	0.1523	0,02763 to 0,2769	Yes	*	0.0176
d6	0.1107	-0,02254 to 0,2439	No	ns	0.1015
d7	0.02408	-0,08539 to 0,1335	No	ns	0.6606
