# Supplementary material for: Kidins220 regulates the development of B cells bearing the λ light chain
Source: eLife. 2024 Jan 25;13:e83943. doi: 10.7554/eLife.83943 (PMC10810608; doi:10.7554/eLife.83943)
Supplement: Figure 5—figure supplement 1—source data 1. [file elife-83943-fig5-figsupp1-data1.xlsx]

## Sheet: Figure 5-figure supplement 1B
	CTRL												B-KO												CTRL BCL2tg												B-KO BCL2tg
B220		22.7	16.66	17.1	17.58	20.32	18.17	17	22.69	17.25			32.02	19.6	17	17.25	17.15	15.85		21.29	23	16.73	18.41	15.03	39.66	33.1	35.2										33.52	7.4	17.2
One way ANOVA
Uncorrected Fisher's LSD	Mean Diff,	95,00% CI of diff,	Below threshold?	Summary	Individual P Value
CTRL vs. B-KO	-0.5636	-5,628 to 4,501	No	ns	0.8196	A-B
CTRL vs. CTRL BCL2tg	-17.16	-24,67 to -9,645	Yes	****	<0,0001	A-C
CTRL vs. B-KO BCL2tg	-0.5433	-8,055 to 6,968	No	ns	0.8821	A-D
B-KO vs. CTRL BCL2tg	-16.59	-23,93 to -9,254	Yes	***	0.0001	B-C
B-KO vs. B-KO BCL2tg	0.0203	-7,319 to 7,359	No	ns	0.9955	B-D
CTRL BCL2tg vs. B-KO BCL2tg	16.61	7,414 to 25,81	Yes	**	0.0011	C-D

## Sheet: Figure 5-figure supplement 1C
	CTRL			B-KO			CTRL BCL2Tg			B-KO BCL2Tg
pre/pro	63.01	63.37		71.62	66.23	62.25	41.9	32.46	22.83	58.02	29.65	19.46
immature	22.65	22.49		20.53	18.18	16.07	18.2	20.61	9.37	16.31	20.95	6.13
mature	12.95	12.98		6.88	14.58	20.28	34.93	43.97	63.86	21.33	46.58	71.16
2way ANOVA
Uncorrected Fisher's LSD	Predicted (LS) mean diff,	95,00% CI of diff,	Below threshold?	Summary	Individual P Value
pre/pro
CTRL vs. B-KO	-3.51	-26,16 to 19,14	No	ns	0.7504
CTRL vs. CTRL BCL2Tg	30.79	8,142 to 53,44	Yes	*	0.0101
CTRL vs. B-KO BCL2Tg	27.48	4,828 to 50,13	Yes	*	0.0198
B-KO vs. CTRL BCL2Tg	34.3	14,04 to 54,56	Yes	**	0.002
B-KO vs. B-KO BCL2Tg	30.99	10,73 to 51,25	Yes	**	0.0045
CTRL BCL2Tg vs. B-KO BCL2Tg	-3.313	-23,57 to 16,95	No	ns	0.7372
immature
CTRL vs. B-KO	4.31	-18,34 to 26,96	No	ns	0.6963
CTRL vs. CTRL BCL2Tg	6.51	-16,14 to 29,16	No	ns	0.5564
CTRL vs. B-KO BCL2Tg	8.107	-14,54 to 30,76	No	ns	0.465
B-KO vs. CTRL BCL2Tg	2.2	-18,06 to 22,46	No	ns	0.8235
B-KO vs. B-KO BCL2Tg	3.797	-16,46 to 24,06	No	ns	0.7007
CTRL BCL2Tg vs. B-KO BCL2Tg	1.597	-18,66 to 21,86	No	ns	0.8714
mature
CTRL vs. B-KO	-0.9483	-23,60 to 21,70	No	ns	0.9314
CTRL vs. CTRL BCL2Tg	-34.62	-57,27 to -11,97	Yes	**	0.0045
CTRL vs. B-KO BCL2Tg	-33.39	-56,04 to -10,74	Yes	**	0.0059
B-KO vs. CTRL BCL2Tg	-33.67	-53,93 to -13,41	Yes	**	0.0024
B-KO vs. B-KO BCL2Tg	-32.44	-52,70 to -12,18	Yes	**	0.0032
CTRL BCL2Tg vs. B-KO BCL2Tg	1.23	-19,03 to 21,49	No	ns	0.9007

## Sheet: Figure 5-figure supplement 1D
	CTRL												B-KO												CTRL BCL2tg												B-KO BCL2tg
IgM	27.39	29.9	31.71	37.68	33.93	32.18	23.95	29.09	19.94	24.73			21.49	27.7	31.6	27.17	21.1	21.14	27.36	25.37	22.53	21.47	20.25	20.46	44.55	57.2	63										29.76	49.1	66.9
One way ANOVA
Uncorrected Fisher's LSD	Mean Diff,	95,00% CI of diff,	Below threshold?	Summary	Individual P Value
CTRL vs. B-KO	5.08	-1,341 to 11,50	No	ns	0.1156	A-B
CTRL vs. CTRL BCL2tg	-25.87	-35,74 to -15,99	Yes	****	<0,0001	A-C
CTRL vs. B-KO BCL2tg	-19.54	-29,41 to -9,665	Yes	***	0.0004	A-D
B-KO vs. CTRL BCL2tg	-30.95	-40,63 to -21,27	Yes	****	<0,0001	B-C
B-KO vs. B-KO BCL2tg	-24.62	-34,30 to -14,94	Yes	****	<0,0001	B-D
CTRL BCL2tg vs. B-KO BCL2tg	6.33	-5,915 to 18,57	No	ns	0.2966	C-D

## Sheet: Figure 5-figure supplement 1E
	CTRL												B-KO												CTRL BCL2tg												B-KO BCL2tg
kappa+	20.61	21.4	27.54	30.68	29.11	26.79	19.99	22.53	17.28	20.22			18.08	22.7	27.6	25.85	18.8	19.48	24.02	20.99	18.37	16.38	18.29	18.06	24.05	41.3	50.3										23.96	40.1	68.8
One way ANOVA
Uncorrected Fisher's LSD	Mean Diff,	95,00% CI of diff,	Below threshold?	Summary	Individual P Value
CTRL vs. B-KO	2.897	-4,565 to 10,36	No	ns	0.4309	A-B
CTRL vs. CTRL BCL2tg	-14.94	-26,41 to -3,463	Yes	*	0.0129	A-C
CTRL vs. B-KO BCL2tg	-20.67	-32,14 to -9,200	Yes	**	0.0011	A-D
B-KO vs. CTRL BCL2tg	-17.83	-29,08 to -6,583	Yes	**	0.0032	B-C
B-KO vs. B-KO BCL2tg	-23.57	-34,82 to -12,32	Yes	***	0.0002	B-D
CTRL BCL2tg vs. B-KO BCL2tg	-5.737	-19,97 to 8,492	No	ns	0.4136	C-D

## Sheet: Figure 5-figure supplement 1F
	CTRL												B-KO												CTRL BCL2tg												B-KO BCL2tg
lambda+	3.97	3.4	3.04	2.94	2.97	2.83	3.95	4.75	3.07	4			0.63	1	0.5	0.77	0.87	1.12	0.69	1.29	1.83	1.45	1.68	1.96	19.82	23	18.3										5.92	8.3	10.5
One way ANOVA
Uncorrected Fisher's LSD	Mean Diff,	95,00% CI of diff,	Below threshold?	Summary	Individual P Value
CTRL vs. B-KO	2.343	1,382 to 3,303	Yes	****	<0,0001	A-B
CTRL vs. CTRL BCL2tg	-16.88	-18,36 to -15,40	Yes	****	<0,0001	A-C
CTRL vs. B-KO BCL2tg	-4.748	-6,224 to -3,272	Yes	****	<0,0001	A-D
B-KO vs. CTRL BCL2tg	-19.22	-20,67 to -17,78	Yes	****	<0,0001	B-C
B-KO vs. B-KO BCL2tg	-7.091	-8,539 to -5,643	Yes	****	<0,0001	B-D
CTRL BCL2tg vs. B-KO BCL2tg	12.13	10,30 to 13,96	Yes	****	<0,0001	C-D

## Sheet: Figure 5-figure supplement 1G
% kappa									cell number kappa
	CTRL	CTRL+BCL2-TG	B-KO	B-KO+BCL2						CTRL	CTRL+BCL2-TG	B-KO	B-KO+BCL2
	0.87275	1.01842	0.872657	1.15646						1.22035		1.7062
	0.906204	1.74889	1.09565	1.93548						1.05367		1.12444
	1.16621	2.13	1.33215	3.32073						0.910741		1.06424
	1.29917		1.24769							1.07644
	1.23269		0.907409							1.02804		1.47369
	1.13445		0.94023							0.668257		0.916167
	0.846496		1.15936							0.942521		0.458045
	0.954055		1.01311							0.595037		0.730138
	0.731738		0.886654									0.490493
	0.856235		0.790604							1.45585	1.6346	0.996417	1.38233
			0.882793							1.0491	4.30383	0.834116	0.54425
			0.871692								7.2081	1.20605	3.5122
one way ANOVA										one way ANOVA
Uncorrected Fisher's LSD	Mean Diff,	95,00% CI of diff,	Below threshold?	Summary	Individual P Value					Uncorrected Fisher's LSD	Mean Diff,	95,00% CI of diff,	Below threshold?	Summary	Individual P Value
CTRL vs. CTRL+BCL2-TG	-0.6324	-1,166 to -0,09929	Yes	*	0.022	A-B				CTRL vs. CTRL+BCL2-TG	-3.382	-4,721 to -2,044	Yes	****	<0,0001	A-B
CTRL vs. B-KO	-1.667e-08	-0,3468 to 0,3468	No	ns	>0,9999	A-C				CTRL vs. B-KO	-9.091e-09	-0,8885 to 0,8885	No	ns	>0,9999	A-C
CTRL vs. B-KO+BCL2	-1.138	-1,671 to -0,6044	Yes	***	0.0002	A-D				CTRL vs. B-KO+BCL2	-0.8129	-2,151 to 0,5256	No	ns	0.2216	A-D
CTRL+BCL2-TG vs. B-KO	0.6324	0,1096 to 1,155	Yes	*	0.0198	B-C				CTRL+BCL2-TG vs. B-KO	3.382	2,058 to 4,707	Yes	****	<0,0001	B-C
CTRL+BCL2-TG vs. B-KO+BCL2	-0.5051	-1,166 to 0,1562	No	ns	0.128	B-D				CTRL+BCL2-TG vs. B-KO+BCL2	2.569	0,9090 to 4,230	Yes	**	0.004	B-D
B-KO vs. B-KO+BCL2	-1.138	-1,660 to -0,6148	Yes	***	0.0002	C-D				B-KO vs. B-KO+BCL2	-0.8129	-2,137 to 0,5115	No	ns	0.2169	C-D
%lambda									cell number lambda
	CTRL	CTRL+BCL2-TG	B-KO	B-KO+BCL2						CTRL	CTRL+BCL2-TG	B-KO	B-KO+BCL2
	1.13688	5.67583	0.548223	5.15156						0.887047		0.931687
	0.973654	6.58648	0.870196	7.22262						0.664886		0.95391
	0.870561	5.24055	0.435098	9.13706						0.611874		1.1217
	0.841924		0.670051							0.74878
	0.850515		0.75707							1.33767		1.66033
	0.810424		0.974619							0.927746		1.67312
	1.13116		0.600435							1.10265		0.743314
	1.36025		1.12255							0.775132		1.22945
	0.879152		1.59246									0.975847
	1.14548		1.26178							1.84664	8.87059	0.636493	6.2612
			1.46193							1.09757	15.7829	0.673613	2.06511
			1.70558								17.2686	0.400533	9.82629
one way ANOVA									one way ANOVA
Uncorrected Fisher's LSD	Mean Diff,	95,00% CI of diff,	Below threshold?	Summary	Individual P Value				Uncorrected Fisher's LSD	Mean Diff,	95,00% CI of diff,	Below threshold?	Summary	Individual P Value
CTRL vs. CTRL+BCL2-TG	-4.834	-5,763 to -3,906	Yes	****	<0,0001	A-B			CTRL vs. CTRL+BCL2-TG	-12.97	-15,40 to -10,54	Yes	****	<0,0001	A-B
CTRL vs. B-KO	-2e-07	-0,6038 to 0,6038	No	ns	>0,9999	A-C			CTRL vs. B-KO	-8.182e-08	-1,613 to 1,613	No	ns	>0,9999	A-C
CTRL vs. B-KO+BCL2	-6.17	-7,099 to -5,242	Yes	****	<0,0001	A-D			CTRL vs. B-KO+BCL2	-5.051	-7,481 to -2,621	Yes	***	0.0003	A-D
CTRL+BCL2-TG vs. B-KO	4.834	3,924 to 5,745	Yes	****	<0,0001	B-C			CTRL+BCL2-TG vs. B-KO	12.97	10,57 to 15,38	Yes	****	<0,0001	B-C
CTRL+BCL2-TG vs. B-KO+BCL2	-1.336	-2,488 to -0,1846	Yes	*	0.0248	B-D			CTRL+BCL2-TG vs. B-KO+BCL2	7.923	4,909 to 10,94	Yes	****	<0,0001	B-D
B-KO vs. B-KO+BCL2	-6.17	-7,081 to -5,260	Yes	****	<0,0001	C-D			B-KO vs. B-KO+BCL2	-5.051	-7,455 to -2,647	Yes	***	0.0002	C-D

## Sheet: Figure 5-figure supplement 1H
	CTRL												B-KO												CTRL BCL2tg												B-KO BCL2tg
B220	53.7	45.4		43.83	47.41	51.39	50.99	65.96	54.29	62.27	58.9		50.5	39.1	52.7	45.12	43.62	51.76	56.15	58.63	51	58.1	54.15	53.29	46.8	38.6	53										43.4	23.3	33
One way ANOVA
Uncorrected Fisher's LSD	Mean Diff,	95,00% CI of diff,	Below threshold?	Summary	Individual P Value
CTRL vs. B-KO	2.237	-3,905 to 8,380	No	ns	0.4595	A-B
CTRL vs. CTRL BCL2tg	7.281	-2,163 to 16,72	No	ns	0.1247	A-C
CTRL vs. B-KO BCL2tg	20.18	10,74 to 29,62	Yes	***	0.0002	A-D
B-KO vs. CTRL BCL2tg	5.043	-4,217 to 14,30	No	ns	0.2721	B-C
B-KO vs. B-KO BCL2tg	17.94	8,683 to 27,20	Yes	***	0.0005	B-D
CTRL BCL2tg vs. B-KO BCL2tg	12.9	1,186 to 24,61	Yes	*	0.0323	C-D

## Sheet: Figure 5-figure supplement 1I
	CTRL												B-KO												CTRL BCL2tg												B-KO BCL2tg
IgM	98.1	97.2		95.2	96.17	96.33	95.71	91.37	96.52	95.46	95.23		97.4	98.2	99	97.3	95.77	96.52	96.86	97.2	96.37	95.09	97.3	97.22	92.6	96.4	97.5										96	93.4	98.6
One way ANOVA
Uncorrected Fisher's LSD	Mean Diff,	95,00% CI of diff,	Below threshold?	Summary	Individual P Value
CTRL vs. B-KO	-1.29	-2,766 to 0,1862	No	ns	0.0839	A-B
CTRL vs. CTRL BCL2tg	0.229	-2,041 to 2,499	No	ns	0.8368	A-C
CTRL vs. B-KO BCL2tg	-0.271	-2,541 to 1,999	No	ns	0.8074	A-D
B-KO vs. CTRL BCL2tg	1.519	-0,7065 to 3,745	No	ns	0.1717	B-C
B-KO vs. B-KO BCL2tg	1.019	-1,206 to 3,245	No	ns	0.354	B-D
CTRL BCL2tg vs. B-KO BCL2tg	-0.5	-3,315 to 2,315	No	ns	0.7172	C-D

## Sheet: Figure 5-figure supplement 1J
	CTRL			B-KO			CTRL BCL2tg			B-KO BCL2tg
transitional	19.33	14.24		20.93	12.17	11.3	12.77	8.33	9.38	9.05	2.35	6.17
One way ANOVA
Uncorrected Fisher's LSD	Mean Diff,	95,00% CI of diff,	Below threshold?	Summary	Individual P Value
CTRL vs. B-KO	1.985	-6,298 to 10,27	No	ns	0.5886	A-B
CTRL vs. CTRL BCL2tg	6.625	-1,658 to 14,91	No	ns	0.1005	A-C
CTRL vs. B-KO BCL2tg	10.93	2,646 to 19,21	Yes	*	0.0168	A-D
B-KO vs. CTRL BCL2tg	4.64	-2,768 to 12,05	No	ns	0.1821	B-C
B-KO vs. B-KO BCL2tg	8.943	1,535 to 16,35	Yes	*	0.0245	B-D
CTRL BCL2tg vs. B-KO BCL2tg	4.303	-3,105 to 11,71	No	ns	0.2119	C-D

## Sheet: Figure 5-figure supplement 1K
	CTRL			B-KO			CTRL BCL2tg			B-KO BCL2tg
FO	81.41	84.81		79.04	77.61	82.04	73.07	76.84	73.11	82.93	87.36	93.43
One way ANOVA
Uncorrected Fisher's LSD	Mean Diff,	95,00% CI of diff,	Below threshold?	Summary	Individual P Value
CTRL vs. B-KO	3.547	-3,794 to 10,89	No	ns	0.2908	A-B
CTRL vs. CTRL BCL2tg	8.77	1,429 to 16,11	Yes	*	0.0256	A-C
CTRL vs. B-KO BCL2tg	-4.797	-12,14 to 2,544	No	ns	0.1662	A-D
B-KO vs. CTRL BCL2tg	5.223	-1,342 to 11,79	No	ns	0.102	B-C
B-KO vs. B-KO BCL2tg	-8.343	-14,91 to -1,778	Yes	*	0.0198	B-D
CTRL BCL2tg vs. B-KO BCL2tg	-13.57	-20,13 to -7,001	Yes	**	0.0018	C-D

[truncated: 4 more sheets: Figure 5-figure supplement 1L, Figure 5-figure supplement 1M, Figure 5-figure supplement 1N, Figure 5-figure supplement 1O]
