# Supplementary material for: Kidins220 regulates the development of B cells bearing the λ light chain
Source: eLife. 2024 Jan 25;13:e83943. doi: 10.7554/eLife.83943 (PMC10810608; doi:10.7554/eLife.83943)
Supplement: Figure 5—source data 1. [file elife-83943-fig5-data1.xlsx]

## Sheet: Figure 5B
	CTRL												B-KO												CTRL BCL2tg												B-KO BCL2tg
cells	68600000	51800000	45900000	51000000	73000000	45000000	62000000	44000000		41700000	55700000		84700000	77200000	76300000		73000000	48000000	37000000	48000000	40000000	38100000	41500000	56900000										44200000	81200000	105000000										38100000	40600000	65700000
One Way ANOVA
Uncorrected Fisher's LSD	Mean Diff,	95,00% CI of diff,	Below threshold?	Summary	Individual P Value
CTRL vs. B-KO	-2557273	-17920225 to 12805680	No	ns	0.7337	A-B
CTRL vs. CTRL BCL2tg	-22930000	-46075813 to 215813	No	ns	0.052	A-C
CTRL vs. B-KO BCL2tg	5736667	-17409146 to 28882480	No	ns	0.613	A-D
B-KO vs. CTRL BCL2tg	-20372727	-43274465 to 2529010	No	ns	0.0787	B-C
B-KO vs. B-KO BCL2tg	8293939	-14607798 to 31195677	No	ns	0.4613	B-D
CTRL BCL2tg vs. B-KO BCL2tg	28666667	-42181 to 57375514	No	ns	0.0503	C-D

## Sheet: Figure 5C
	CTRL												B-KO												CTRL BCL2tg												B-KO BCL2tg
B220	11428760	8857800	8069220	10363200	13264100	7650000	14067800	7590000		18156180	14392880		14610750	13239800	12093550		15541700	11040000	6190100	8836800	6012000	11830050	9001350	9496610										18687760	33633040	44152500										12447270	4177740	14250330
One Way ANOVA
Uncorrected Fisher's LSD	Mean Diff,	95,00% CI of diff,	Below threshold?	Summary	Individual P Value
CTRL vs. B-KO	666475	-3935516 to 5268466	No	ns	0.7672	A-B
CTRL vs. CTRL BCL2tg	-20773773	-27707129 to -13840416	Yes	****	<0,0001	A-C
CTRL vs. B-KO BCL2tg	1092214	-5841142 to 8025570	No	ns	0.7475	A-D
B-KO vs. CTRL BCL2tg	-21440248	-28300491 to -14580004	Yes	****	<0,0001	B-C
B-KO vs. B-KO BCL2tg	425739	-6434504 to 7285982	No	ns	0.899	B-D
CTRL BCL2tg vs. B-KO BCL2tg	21865987	13266217 to 30465757	Yes	****	<0,0001	C-D

## Sheet: Figure 5D
	CTRL			B-KO			CTRL BCL2tg			B-KO BCL2tg
pre pro	11440209	9.12077e+06		8.47268e+06	5.96159e+06	5.91164e+06	7.83017e+06	1.09173e+07	1.008e+07	7.22191e+06	1.2387e+06	2.77311e+06
immature	4.11237e+06	3.23696e+06		2.42871e+06	1.63645e+06	1.52611e+06	3.40117e+06	6.93177e+06	4.13709e+06	2.03015e+06	875237	873545
mature	2.35123e+06	1.8682e+06		813907	1.3124e+06	1.92591e+06	6.52763e+06	1.47884e+07	2.81958e+07	2.655e+06	1.94599e+06	1.01405e+07
2way ANOVA
Uncorrected Fisher's LSD	Predicted (LS) mean diff,	95,00% CI of diff,	Below threshold?	Summary	Individual P Value
pre pro
CTRL vs. B-KO	3498517	-3926311 to 10923344	No	ns	0.3383
CTRL vs. CTRL BCL2tg	671331	-6753496 to 8096159	No	ns	0.8527
CTRL vs. B-KO BCL2tg	6535915	-888912 to 13960743	No	ns	0.0814
B-KO vs. CTRL BCL2tg	-2827185	-9468153 to 3813782	No	ns	0.386
B-KO vs. B-KO BCL2tg	3037398	-3603569 to 9678366	No	ns	0.3523
CTRL BCL2tg vs. B-KO BCL2tg	5864584	-776384 to 12505551	No	ns	0.0805
immature
CTRL vs. B-KO	1810913	-5613914 to 9235741	No	ns	0.6173
CTRL vs. CTRL BCL2tg	-1148677	-8573504 to 6276150	No	ns	0.7508
CTRL vs. B-KO BCL2tg	2415023	-5009804 to 9839850	No	ns	0.5062
B-KO vs. CTRL BCL2tg	-2959590	-9600558 to 3681377	No	ns	0.3646
B-KO vs. B-KO BCL2tg	604109	-6036858 to 7245077	No	ns	0.8518
CTRL BCL2tg vs. B-KO BCL2tg	3563700	-3077268 to 10204667	No	ns	0.277
mature
CTRL vs. B-KO	758972	-6665856 to 8183799	No	ns	0.8337
CTRL vs. CTRL BCL2tg	-14394246	-21819073 to -6969418	Yes	***	0.0006
CTRL vs. B-KO BCL2tg	-2804132	-10228960 to 4620695	No	ns	0.441
B-KO vs. CTRL BCL2tg	-15153217	-21794185 to -8512250	Yes	***	0.0001
B-KO vs. B-KO BCL2tg	-3563104	-10204071 to 3077863	No	ns	0.2771
CTRL BCL2tg vs. B-KO BCL2tg	11590113	4949146 to 18231081	Yes	**	0.0016

## Sheet: Figure 5E
	CTRL												B-KO												CTRL BCL2tg												B-KO BCL2tg
m	3.62406e+06	3.33762e+06	2.73789e+06	3.33488e+06	3.17675e+06	2225385	2.80512e+06	1877007		4.99011e+06	3.78053e+06		3.96974e+06	2.7936e+06	2.55658e+06		3.94293e+06	2487312	1.32901e+06	1789452	1.23006e+06	2.6217e+06	2253118	3056668										7.80949e+06	1.53738e+07	23284800										3.80069e+06	1.47516e+06	7.55997e+06
One Way ANOVA
Uncorrected Fisher's LSD	Mean Diff,	95,00% CI of diff,	Below threshold?	Summary	Individual P Value
CTRL vs. B-KO	640738	-1695248 to 2976723	No	ns	0.5759	A-B
CTRL vs. CTRL BCL2tg	-12300415	-15819809 to -8781022	Yes	****	<0,0001	A-C
CTRL vs. B-KO BCL2tg	-1089670	-4609064 to 2429724	No	ns	0.5282	A-D
B-KO vs. CTRL BCL2tg	-12941153	-16423434 to -9458872	Yes	****	<0,0001	B-C
B-KO vs. B-KO BCL2tg	-1730408	-5212689 to 1751873	No	ns	0.3147	B-D
CTRL BCL2tg vs. B-KO BCL2tg	11210745	6845474 to 15576016	Yes	****	<0,0001	C-D

## Sheet: Figure 5F
	CTRL												B-KO												CTRL BCL2tg												B-KO BCL2tg
k	3.14748e+06	2.71757e+06	2.34895e+06	2.7763e+06	2.65149e+06	1723545	2.43092e+06	1534698		3.75488e+06	2.70579e+06		3.77688e+06	2.48908e+06	2.35582e+06		3.2622e+06	2028048	1.01394e+06	1.61625e+06	1.08577e+06	2.20569e+06	1846418	2669748										4.2159e+06	1.11003e+07	18590880										3.05996e+06	1.20476e+06	7.77468e+06
One Way ANOVA
Uncorrected Fisher's LSD	Mean Diff,	95,00% CI of diff,	Below threshold?	Summary	Individual P Value
CTRL vs. B-KO	365541	-1841175 to 2572256	No	ns	0.735	A-B
CTRL vs. CTRL BCL2tg	-8723191	-12047827 to -5398554	Yes	****	<0,0001	A-C
CTRL vs. B-KO BCL2tg	-1433970	-4758606 to 1890666	No	ns	0.3815	A-D
B-KO vs. CTRL BCL2tg	-9088731	-12378309 to -5799154	Yes	****	<0,0001	B-C
B-KO vs. B-KO BCL2tg	-1799511	-5089088 to 1490067	No	ns	0.2695	B-D
CTRL BCL2tg vs. B-KO BCL2tg	7289220	3165517 to 11412924	Yes	**	0.0013	C-D

## Sheet: Figure 5G
	CTRL												B-KO												CTRL BCL2tg												B-KO BCL2tg
l	347434	260419	239656	293279	523932	363375	431881	303600		723284	429893		112503	115186	135448		200488	202032	89756.4	148458	117835	76857.6	81340	48365										3.47439e+06	6181756	6763680										756050	249365	1186542
One Way ANOVA
Uncorrected Fisher's LSD	Mean Diff,	95,00% CI of diff,	Below threshold?	Summary	Individual P Value
CTRL vs. B-KO	270924	-221175 to 763022	No	ns	0.2665	A-B
CTRL vs. CTRL BCL2tg	-5081600	-5822996 to -4340205	Yes	****	<0,0001	A-C
CTRL vs. B-KO BCL2tg	-338977	-1080373 to 402418	No	ns	0.3541	A-D
B-KO vs. CTRL BCL2tg	-5352524	-6086101 to -4618946	Yes	****	<0,0001	B-C
B-KO vs. B-KO BCL2tg	-609901	-1343478 to 123677	No	ns	0.0989	B-D
CTRL BCL2tg vs. B-KO BCL2tg	4742623	3823035 to 5662211	Yes	****	<0,0001	C-D

## Sheet: Figure 5I
	CTRL							B-KO							CTRL BCL2tg							B-KO BCL2tg
total sp	151000000	186000000	170000000	144000000	97000000	189000000		118000000	81000000	96000000	88000000	116000000	73200000	79300000					664000000	565000000	340000000					134000000	156000000	249000000
One Way ANOVA
Uncorrected Fisher's LSD	Mean Diff,	95,00% CI of diff,	Below threshold?	Summary	Individual P Value
CTRL vs. B-KO	63095238	-18104874 to 144295350	No	ns	0.1184	A-B
CTRL vs. CTRL BCL2tg	-366833333	-470036875 to -263629792	Yes	****	<0,0001	A-C
CTRL vs. B-KO BCL2tg	-23500000	-126703541 to 79703541	No	ns	0.6344	A-D
B-KO vs. CTRL BCL2tg	-429928571	-530644915 to -329212228	Yes	****	<0,0001	B-C
B-KO vs. B-KO BCL2tg	-86595238	-187311582 to 14121106	No	ns	0.0868	B-D
CTRL BCL2tg vs. B-KO BCL2tg	343333333	224164148 to 462502518	Yes	****	<0,0001	C-D

## Sheet: Figure 5J
	CTRL							B-KO							CTRL BCL2tg							B-KO BCL2tg
B220+	66183300	88182600	87363000	73425600	52089000	85806000		53241600	35332200	49689600	49412000	58580000	28621200	41791100					310752000	218090000	180200000					58156000	36348000	82170000
One Way ANOVA
Uncorrected Fisher's LSD	Mean Diff,	95,00% CI of diff,	Below threshold?	Summary	Individual P Value
CTRL vs. B-KO	30270007	-2968406 to 63508421	No	ns	0.0713	A-B
CTRL vs. CTRL BCL2tg	-160839083	-203084369 to -118593797	Yes	****	<0,0001	A-C
CTRL vs. B-KO BCL2tg	16616917	-25628369 to 58862203	No	ns	0.415	A-D
B-KO vs. CTRL BCL2tg	-191109090	-232336268 to -149881913	Yes	****	<0,0001	B-C
B-KO vs. B-KO BCL2tg	-13653090	-54880268 to 27574087	No	ns	0.4911	B-D
CTRL BCL2tg vs. B-KO BCL2tg	177456000	128675345 to 226236655	Yes	****	<0,0001	C-D

## Sheet: Figure 5K
	CTRL							B-KO							CTRL BCL2tg							B-KO BCL2tg
IgM+	6.30065e+07	8.48052e+07	8.41568e+07	7.02756e+07	51099309	83403432		5.18041e+07	3.38376e+07	4.79604e+07	4.78605e+07	57056920	2.8106e+07	41373189					287756352	210238760	175695000					55829760	33949032	81019620
One Way ANOVA
Uncorrected Fisher's LSD	Mean Diff,	95,00% CI of diff,	Below threshold?	Summary	Individual P Value
CTRL vs. B-KO	28791328	-703518 to 58286174	No	ns	0.055	A-B
CTRL vs. CTRL BCL2tg	-151772226	-189259521 to -114284931	Yes	****	<0,0001	A-C
CTRL vs. B-KO BCL2tg	15858341	-21628954 to 53345636	No	ns	0.3815	A-D
B-KO vs. CTRL BCL2tg	-180563554	-217147408 to -143979700	Yes	****	<0,0001	B-C
B-KO vs. B-KO BCL2tg	-12932987	-49516841 to 23650867	No	ns	0.4628	B-D
CTRL BCL2tg vs. B-KO BCL2tg	167630567	124343967 to 210917167	Yes	****	<0,0001	C-D

## Sheet: Figure 5L
	CTRL							B-KO							CTRL BCL2tg							B-KO BCL2tg
kappa+	5.93995e+07	8.05195e+07	7.99109e+07	6.63253e+07	48130236	79284744		5.16018e+07	3.33925e+07	4.76175e+07	4.72725e+07	56002480	2.74477e+07	4.04538e+07					209757600	161822780	134609400					52224088	30823104	72720450
One Way ANOVA
Uncorrected Fisher's LSD	Mean Diff,	95,00% CI of diff,	Below threshold?	Summary	Individual P Value
CTRL vs. B-KO	25530067	3266012 to 47794121	Yes	*	0.0274	A-B
CTRL vs. CTRL BCL2tg	-99801543	-128098662 to -71504423	Yes	****	<0,0001	A-C
CTRL vs. B-KO BCL2tg	17005837	-11291283 to 45302956	No	ns	0.2197	A-D
B-KO vs. CTRL BCL2tg	-125331609	-152946770 to -97716448	Yes	****	<0,0001	B-C
B-KO vs. B-KO BCL2tg	-8524230	-36139391 to 19090931	No	ns	0.5206	B-D
CTRL BCL2tg vs. B-KO BCL2tg	116807379	84132680 to 149482079	Yes	****	<0,0001	C-D

[truncated: 4 more sheets: Figure 5M, Figure 5N, Figure 5O, Figure 5P]
