# Supplementary material for: Kidins220 regulates the development of B cells bearing the λ light chain
Source: eLife. 2024 Jan 25;13:e83943. doi: 10.7554/eLife.83943 (PMC10810608; doi:10.7554/eLife.83943)
Supplement: Figure 6—figure supplement 1—source data 1. [file elife-83943-fig6-figsupp1-data1.xlsx]

## Sheet: Figure 6-figure supplement 1A
	CTRL														B-KO														CTRL tg														B-KO-tg
B220+	15.2	13.7								22.8	22.2	17.7	17.9	21.9	16.7	16.7	14.9			19.6	30.1	17.4	20.3	10.3	10.8	5.6	16.5	19.1	22	13.6	18.1	18.6	13.5					9.4	11.2	20.2	8.8	10.2	9.7	16.7	12.2		10.7	19.9	14.2
one way ANOVA
Uncorrected Fisher's LSD	Mean Diff,	95,00% CI of diff,	Below threshold?	Summary	Individual P Value
CTRL vs. B-KO	2.271	-2,800 to 7,343	No	ns	0.3703	A-B
CTRL vs. CTRL tg	4.211	-1,044 to 9,466	No	ns	0.113	A-C
CTRL vs. B-KO-tg	4.171	-0,8277 to 9,171	No	ns	0.0994	A-D
B-KO vs. CTRL tg	1.94	-2,626 to 6,506	No	ns	0.3951	B-C
B-KO vs. B-KO-tg	1.9	-2,369 to 6,169	No	ns	0.3732	B-D
CTRL tg vs. B-KO-tg	-0.04	-4,525 to 4,445	No	ns	0.9857	C-D
[truncated: 7 more columns]

## Sheet: Figure 6-figure supplement 1B
	CTRL														B-KO														CTRL tg														B-KO-tg
kappa	22.8	30.4								28.3002	9.324	48.9519	23.0112	24.0382	19.3	21.1	24.4			22.9188	19.2474	25.283	17.4825	22.9068	20.5208	37.98	25.1514	20.0739	0.2	2.3	0.6	0.5	2.2					0	0	0	0	0	0.2	0.1	0.4		1.1	3.411	0.0266
one way ANOVA
Uncorrected Fisher's LSD	Mean Diff,	95,00% CI of diff,	Below threshold?	Summary	Individual P Value
CTRL vs. B-KO	3.659	-1,783 to 9,101	No	ns	0.1814	A-B
CTRL vs. CTRL tg	26.11	20,47 to 31,75	Yes	****	<0,0001	A-C
CTRL vs. B-KO-tg	26.25	20,81 to 31,69	Yes	****	<0,0001	A-D
B-KO vs. CTRL tg	22.45	17,55 to 27,35	Yes	****	<0,0001	B-C
B-KO vs. B-KO-tg	22.59	17,92 to 27,26	Yes	****	<0,0001	B-D
CTRL tg vs. B-KO-tg	0.1425	-4,757 to 5,042	No	ns	0.9533	C-D
[truncated: 6 more columns]

## Sheet: Figure 6-figure supplement 1C
	CTRL														B-KO														CTRL tg														B-KO-tg
lambda	4.7	3.2								5.0848		6.3954	4.2432	3.7758	0.6	0.5	0.7			0.2142	0.1152	0.1962	0.104	0.2985	0.2804	0.4326	0.2996	0.3012	6	8.5	6.9	5.5	7.9					8.3821	4.1625	6.7348	11.3615	9.7206	0.9	0.9	2.2		1.9	0.2628	0.4752
one way ANOVA
Uncorrected Fisher's LSD	Mean Diff,	95,00% CI of diff,	Below threshold?	Summary	Individual P Value
CTRL vs. B-KO	4.23	3,019 to 5,441	Yes	****	<0,0001	A-B
CTRL vs. CTRL tg	-2.95	-4,200 to -1,699	Yes	****	<0,0001	A-C
CTRL vs. B-KO-tg	3.81	2,599 to 5,021	Yes	****	<0,0001	A-D
B-KO vs. CTRL tg	-7.179	-8,216 to -6,142	Yes	****	<0,0001	B-C
B-KO vs. B-KO-tg	-0.4197	-1,409 to 0,5692	No	ns	0.395	B-D
CTRL tg vs. B-KO-tg	6.76	5,722 to 7,797	Yes	****	<0,0001	C-D
[truncated: 6 more columns]

## Sheet: Figure 6-figure supplement 1D
	CTRL														B-KO														CTRL tg														B-KO-tg
LC-	70.86	64.43								58.26	58.78	39.19	58.58	63.51	77.86	75.73	71.92			58.61	64.68	57.11	55.71	64.66	71.42	48.01	68.27	71.87	92.33	88.57	91.46	93.11	89.8					82.99	87.74	83.73	79.71	85.51	97.95	98.32	95.62		95.46	92.5	95.93
one way ANOVA
Uncorrected Fisher's LSD	Mean Diff,	95,00% CI of diff,	Below threshold?	Summary	Individual P Value
CTRL vs. B-KO	-6.4	-13,06 to 0,2570	No	ns	0.059	A-B
CTRL vs. CTRL tg	-28.41	-35,31 to -21,51	Yes	****	<0,0001	A-C
CTRL vs. B-KO-tg	-36.36	-42,92 to -29,79	Yes	****	<0,0001	A-D
B-KO vs. CTRL tg	-22.01	-28,00 to -16,01	Yes	****	<0,0001	B-C
B-KO vs. B-KO-tg	-29.96	-35,56 to -24,35	Yes	****	<0,0001	B-D
CTRL tg vs. B-KO-tg	-7.949	-13,84 to -2,061	Yes	**	0.0095	C-D
[truncated: 7 more columns]

## Sheet: Figure 6-figure supplement 1E
	CTRL														B-KO														CTRL tg														B-KO tg
B220+	33.03	25.38								64.23	40.01	51.98	60.07	58.2	41.12	29.22	35.68			70.95	66.04	76.68	71.7	84.33	42.01	43.17	45.33	49.29	11.88	12.92	15.13	12.34	12.55					24.81	16.87	19.23	19.68	17.98	3.73	4.17	6.22	18.68	3.76		2.1
one way ANOVA
Uncorrected Fisher's LSD	Mean Diff,	95,00% CI of diff,	Below threshold?	Summary	Individual P Value
CTRL vs. B-KO	-7.07	-19,44 to 5,303	No	ns	0.2546	A-B
CTRL vs. CTRL tg	31.22	18,40 to 44,04	Yes	****	<0,0001	A-C
CTRL vs. B-KO tg	40.59	28,39 to 52,78	Yes	****	<0,0001	A-D
B-KO vs. CTRL tg	38.29	27,15 to 49,43	Yes	****	<0,0001	B-C
B-KO vs. B-KO tg	47.66	37,24 to 58,07	Yes	****	<0,0001	B-D
CTRL tg vs. B-KO tg	9.367	-1,575 to 20,31	No	ns	0.0912	C-D
[truncated: 7 more columns]

## Sheet: Figure 6-figure supplement 1F
	CTRL														B-KO														CTRL tg														B-KO tg
kappa	95.4	95.91								79.83	86.38	84.32	86.45	81.33	97.86	96.65	97.52			97.79	97.28	97.59	97.97	94.29	91.76	90.96	87.73	95.33	1.61	0.54	3.17	2.03	2.1					0.05	0.01	0.01	0	0.01	0.56	0.66	0.23		1.32	4.92	0.71
one way ANOVA
Uncorrected Fisher's LSD	Mean Diff,	95,00% CI of diff,	Below threshold?	Summary	Individual P Value
CTRL vs. B-KO	-8.139	-11,27 to -5,011	Yes	****	<0,0001	A-B
CTRL vs. CTRL tg	86.14	82,89 to 89,38	Yes	****	<0,0001	A-C
CTRL vs. B-KO tg	86.22	83,14 to 89,30	Yes	****	<0,0001	A-D
B-KO vs. CTRL tg	94.27	91,46 to 97,09	Yes	****	<0,0001	B-C
B-KO vs. B-KO tg	94.36	91,72 to 96,99	Yes	****	<0,0001	B-D
CTRL tg vs. B-KO tg	0.083	-2,683 to 2,849	No	ns	0.9519	C-D
[truncated: 7 more columns]

## Sheet: Figure 6-figure supplement 1G
	CTRL														B-KO														CTRL tg														B-KO tg
lambda	13.59	6.89								9.6	11.08	11.14	9.83	8.19	1.72	2.07	2.26			9.76	8.97	5.84		2.41	1.28	1.46	1.6	1.31	88.21	86.84	85.5	82.68	84.85					94.1	89.24	88.98	82.64	82.6	77	72.3	76.39		80.21		75.79
one way ANOVA
Uncorrected Fisher's LSD	Mean Diff,	95,00% CI of diff,	Below threshold?	Summary	Individual P Value
CTRL vs. B-KO	6.529	2,788 to 10,27	Yes	**	0.0011	A-B
CTRL vs. CTRL tg	-76.52	-80,33 to -72,70	Yes	****	<0,0001	A-C
CTRL vs. B-KO tg	-69.14	-72,82 to -65,46	Yes	****	<0,0001	A-D
B-KO vs. CTRL tg	-83.05	-86,43 to -79,67	Yes	****	<0,0001	B-C
B-KO vs. B-KO tg	-75.67	-78,90 to -72,44	Yes	****	<0,0001	B-D
CTRL tg vs. B-KO tg	7.381	4,067 to 10,69	Yes	****	<0,0001	C-D
[truncated: 7 more columns]

## Sheet: Figure 6-figure supplement 1H
	CTRL														B-KO														CTRL tg														B-KO tg
LC-	2.46	2.38								11.16	7.07	7.64	5.83	9.96	1.24	2.41	1.58			1.84	2.53	2.13	1.47	3.21	5.81	6.15	8.7	2.88	9.95	11	12.53	14.66	12.6					4.58	9.08	8.58	13.22	14.17	22.16	26.03	21.64	5.17	17.93		21.14
one way ANOVA
Uncorrected Fisher's LSD	Mean Diff,	95,00% CI of diff,	Below threshold?	Summary	Individual P Value
CTRL vs. B-KO	3.314	-0,8363 to 7,464	No	ns	0.1143	A-B
CTRL vs. CTRL tg	-4.394	-8,694 to -0,09395	Yes	*	0.0454	A-C
CTRL vs. B-KO tg	-10.77	-14,86 to -6,676	Yes	****	<0,0001	A-D
B-KO vs. CTRL tg	-7.708	-11,44 to -3,972	Yes	***	0.0002	B-C
B-KO vs. B-KO tg	-14.08	-17,57 to -10,59	Yes	****	<0,0001	B-D
CTRL tg vs. B-KO tg	-6.373	-10,04 to -2,703	Yes	**	0.0012	C-D
[truncated: 7 more columns]
