# Supplementary material for: Kidins220 regulates the development of B cells bearing the λ light chain
Source: eLife. 2024 Jan 25;13:e83943. doi: 10.7554/eLife.83943 (PMC10810608; doi:10.7554/eLife.83943)
Supplement: Figure 6—source data 1. [file elife-83943-fig6-data1.xlsx]

## Sheet: Figure 6C
	CTRL					B-KO					CTRL tg					B-KO-tg
total BM cells	34800000	55500000	64000000			33250000	45750000	40300000			67500000	80000000	76000000	95000000	76500000	76500000	66500000	85000000	40500000	88500000
one way ANOVA
Uncorrected Fisher's LSD	Mean Diff,	95,00% CI of diff,	Below threshold?	Summary	Individual P Value
CTRL vs. B-KO	11666667	-13577796 to 36911130	No	ns	0.3338	A-B
CTRL vs. CTRL tg	-27566667	-50146001 to -4987332	Yes	*	0.0208	A-C
CTRL vs. B-KO-tg	-19966667	-42546001 to 2612668	No	ns	0.078	A-D
B-KO vs. CTRL tg	-39233333	-61812668 to -16653999	Yes	**	0.0026	B-C
B-KO vs. B-KO-tg	-31633333	-54212668 to -9053999	Yes	*	0.01	B-D
CTRL tg vs. B-KO-tg	7600000	-11954277 to 27154277	No	ns	0.4137	C-D

## Sheet: Figure 6D
	CTRL					B-KO					CTRL tg					B-KO-tg
B220+	3.18161e+06	5.61747e+06	9.38783e+06			4.21559e+06	5.37764e+06	4.06073e+06			14134230	9.91014e+06	12540016	1.63995e+07	9.89599e+06	7.04849e+06	1.06125e+07	9633645	3738150	8.66369e+06
one way ANOVA
Uncorrected Fisher's LSD	Mean Diff,	95,00% CI of diff,	Below threshold?	Summary	Individual P Value
CTRL vs. B-KO	1510983	-3108532 to 6130497	No	ns	0.4897	A-B
CTRL vs. CTRL tg	-6513682	-10645501 to -2381863	Yes	**	0.0049	A-C
CTRL vs. B-KO-tg	-1876988	-6008807 to 2254832	No	ns	0.3418	A-D
B-KO vs. CTRL tg	-8024665	-12156484 to -3892846	Yes	**	0.0012	B-C
B-KO vs. B-KO-tg	-3387970	-7519790 to 743849	No	ns	0.0993	B-D
CTRL tg vs. B-KO-tg	4636694	1058434 to 8214955	Yes	*	0.0154	C-D

## Sheet: Figure 6E
	CTRL					B-KO					CTRL tg					B-KO-tg
kappa	724135	1.70546e+06	1.58654e+06			813609	1.13576e+06	992037			24028.2	226942	72732.1	77077.9	219691	16211.5	13796.2	39497.9	15764.9	93567.8
one way ANOVA
Uncorrected Fisher's LSD	Mean Diff,	95,00% CI of diff,	Below threshold?	Summary	Individual P Value
CTRL vs. B-KO	358246	-60517 to 777009	No	ns	0.087	A-B
CTRL vs. CTRL tg	1214619	840066 to 1589172	Yes	****	<0,0001	A-C
CTRL vs. B-KO-tg	1302946	928393 to 1677499	Yes	****	<0,0001	A-D
B-KO vs. CTRL tg	856373	481820 to 1230926	Yes	***	0.0003	B-C
B-KO vs. B-KO-tg	944700	570147 to 1319253	Yes	***	0.0001	B-D
CTRL tg vs. B-KO-tg	88327	-236046 to 412699	No	ns	0.564	C-D

## Sheet: Figure 6F
	CTRL					B-KO					CTRL tg					B-KO-tg
lambda	148581	182006	311676			26979.8	28501.5	30049.4			849467	847317	871531	893775	777825	62026.7	100819	209050	63548.6	160278
one way ANOVA
Uncorrected Fisher's LSD	Mean Diff,	95,00% CI of diff,	Below threshold?	Summary	Individual P Value
CTRL vs. B-KO	185577	84304 to 286851	Yes	**	0.0018	A-B
CTRL vs. CTRL tg	-633895	-724477 to -543313	Yes	****	<0,0001	A-C
CTRL vs. B-KO-tg	94943	4361 to 185525	Yes	*	0.0414	A-D
B-KO vs. CTRL tg	-819473	-910055 to -728891	Yes	****	<0,0001	B-C
B-KO vs. B-KO-tg	-90634	-181216 to -52,27	Yes	*	0.0499	B-D
CTRL tg vs. B-KO-tg	728839	650392 to 807285	Yes	****	<0,0001	C-D

## Sheet: Figure 6G
	CTRL					B-KO					CTRL tg					B-KO-tg
LC-	2.25449e+06	3.61933e+06	7.31312e+06			3.28226e+06	4.07248e+06	2.92048e+06			1.30501e+07	8.77741e+06	1.14691e+07	1.52696e+07	8.8866e+06	6.90399e+06	1.04342e+07	9.21169e+06	3.65884e+06	8.27036e+06
one way ANOVA
Uncorrected Fisher's LSD	Mean Diff,	95,00% CI of diff,	Below threshold?	Summary	Individual P Value
CTRL vs. B-KO	970574	-3396109 to 5337257	No	ns	0.6369	A-B
CTRL vs. CTRL tg	-7094925	-11000605 to -3189245	Yes	**	0.0019	A-C
CTRL vs. B-KO-tg	-3300166	-7205846 to 605514	No	ns	0.0905	A-D
B-KO vs. CTRL tg	-8065498	-11971179 to -4159818	Yes	***	0.0007	B-C
B-KO vs. B-KO-tg	-4270740	-8176420 to -365060	Yes	*	0.0346	B-D
CTRL tg vs. B-KO-tg	3794759	412340 to 7177177	Yes	*	0.0309	C-D

## Sheet: Figure 6I
	CTRL					B-KO					CTRL tg					B-KO-tg
splenocytes	112000000	101000000	100000000			114000000	120000000	107500000			74000000	55500000	71500000	51500000	63500000	32500000	46450000	32550000	57000000	26350000
one way ANOVA
Uncorrected Fisher's LSD	Mean Diff,	95,00% CI of diff,	Below threshold?	Summary	Individual P Value
CTRL vs. B-KO	-9500000	-27081206 to 8081206	No	ns	0.2619	A-B
CTRL vs. CTRL tg	41133333	25408225 to 56858442	Yes	****	<0,0001	A-C
CTRL vs. B-KO-tg	65363333	49638225 to 81088442	Yes	****	<0,0001	A-D
B-KO vs. CTRL tg	50633333	34908225 to 66358442	Yes	****	<0,0001	B-C
B-KO vs. B-KO-tg	74863333	59138225 to 90588442	Yes	****	<0,0001	B-D
CTRL tg vs. B-KO-tg	24230000	10611657 to 37848343	Yes	**	0.0022	C-D

## Sheet: Figure 6J
	CTRL					B-KO					CTRL tg					B-KO-tg
B220	2.33911e+07	2.18579e+07	15424076			3.91468e+07	2.93731e+07	30780690			8.5345e+06	7.07308e+06	1.0594e+07	6.20258e+06	7.8011e+06	1178307	1.89106e+06	1.96104e+06	2.43299e+06	974512
one way ANOVA
Uncorrected Fisher's LSD	Mean Diff,	95,00% CI of diff,	Below threshold?	Summary	Individual P Value
CTRL vs. B-KO	-12875849	-18116774 to -7634924	Yes	***	0.0002	A-B
CTRL vs. CTRL tg	12183303	7495677 to 16870928	Yes	***	0.0001	A-C
CTRL vs. B-KO-tg	18536776	13849150 to 23224402	Yes	****	<0,0001	A-D
B-KO vs. CTRL tg	25059152	20371526 to 29746778	Yes	****	<0,0001	B-C
B-KO vs. B-KO-tg	31412625	26724999 to 36100251	Yes	****	<0,0001	B-D
CTRL tg vs. B-KO-tg	6353473	2293870 to 10413077	Yes	**	0.0052	C-D

## Sheet: Figure 6K
	CTRL					B-KO					CTRL tg					B-KO-tg
kappa	2.23151e+07	2.0964e+07	1.39758e+07			3.83091e+07	2.83891e+07	3.00173e+07			137405	38194.6	335830	125912	163823	6598.52	12481	4510.39	114107	12863.6
one way ANOVA
Uncorrected Fisher's LSD	Mean Diff,	95,00% CI of diff,	Below threshold?	Summary	Individual P Value
CTRL vs. B-KO	-13153582	-18204369 to -8102794	Yes	***	0.0001	A-B
CTRL vs. CTRL tg	18924691	14407129 to 23442253	Yes	****	<0,0001	A-C
CTRL vs. B-KO-tg	19054812	14537250 to 23572374	Yes	****	<0,0001	A-D
B-KO vs. CTRL tg	32078272	27560710 to 36595834	Yes	****	<0,0001	B-C
B-KO vs. B-KO-tg	32208393	27690831 to 36725955	Yes	****	<0,0001	B-D
CTRL tg vs. B-KO-tg	130121	-3782202 to 4042445	No	ns	0.9434	C-D

## Sheet: Figure 6L
	CTRL					B-KO					CTRL tg					B-KO-tg
lambda	3.17884e+06	1.50601e+06	1.71361e+06			673325	608023	695644			7.52828e+06	6.14226e+06	9.05789e+06	5.12829e+06	6.61923e+06	907296	1.36724e+06	1.49804e+06	1.9369e+06	781656
one way ANOVA
Uncorrected Fisher's LSD	Mean Diff,	95,00% CI of diff,	Below threshold?	Summary	Individual P Value
CTRL vs. B-KO	1473826	-258771 to 3206423	No	ns	0.0886	A-B
CTRL vs. CTRL tg	-4762367	-6312048 to -3212685	Yes	****	<0,0001	A-C
CTRL vs. B-KO-tg	834598	-715083 to 2384280	No	ns	0.2634	A-D
B-KO vs. CTRL tg	-6236193	-7785875 to -4686511	Yes	****	<0,0001	B-C
B-KO vs. B-KO-tg	-639228	-2188910 to 910454	No	ns	0.3865	B-D
CTRL tg vs. B-KO-tg	5596965	4254901 to 6939029	Yes	****	<0,0001	C-D

## Sheet: Figure 6M
	CTRL					B-KO					CTRL tg					B-KO-tg
LC-	575420	520219	797425			485421	707892	486335			849182	778039	1.32743e+06	909298	982938	261113	492243	424368	398037	174730
one way ANOVA
Uncorrected Fisher's LSD	Mean Diff,	95,00% CI of diff,	Below threshold?	Summary	Individual P Value
CTRL vs. B-KO	71139	-221929 to 364207	No	ns	0.6065	A-B
CTRL vs. CTRL tg	-338356	-600484 to -76228	Yes	*	0.0157	A-C
CTRL vs. B-KO-tg	280923	18795 to 543051	Yes	*	0.0377	A-D
B-KO vs. CTRL tg	-409495	-671623 to -147367	Yes	**	0.0052	B-C
B-KO vs. B-KO-tg	209784	-52344 to 471912	No	ns	0.1067	B-D
CTRL tg vs. B-KO-tg	619279	392270 to 846289	Yes	****	<0,0001	C-D
