# Supplementary material for: Kidins220 regulates the development of B cells bearing the λ light chain
Source: eLife. 2024 Jan 25;13:e83943. doi: 10.7554/eLife.83943 (PMC10810608; doi:10.7554/eLife.83943)
Supplement: Figure 7—figure supplement 1—source data 1. [file elife-83943-fig7-figsupp1-data1.xlsx]

## Sheet: Figure 7-figure supplement 1A
	CTRL									B-KO									CTRL tg									B-KO tg
B220	9		8.8	7.3	20.3					3.5	8.3	3.8	8.7	8.1	17.8	23.6	29.1	28.1	2.4	19.7	15.2	9.6	5.1					3.2	4.4	2.2		4.6	20.4	32.9	39.2	17.2
one way ANOVA
Uncorrected Fisher's LSD	Mean Diff,	95,00% CI of diff,	Below threshold?	Summary	Individual P Value
CTRL vs. B-KO	-3.206	-16,79 to 10,38	No	ns	0.6293	A-B
CTRL vs. CTRL tg	0.95	-14,21 to 16,11	No	ns	0.8978	A-C
CTRL vs. B-KO tg	-4.163	-18,00 to 9,677	No	ns	0.5392	A-D
B-KO vs. CTRL tg	4.156	-8,450 to 16,76	No	ns	0.5013	B-C
B-KO vs. B-KO tg	-0.9569	-11,94 to 10,02	No	ns	0.8582	B-D
CTRL tg vs. B-KO tg	-5.113	-18,00 to 7,772	No	ns	0.4194	C-D

## Sheet: Figure 7-figure supplement 1B
	CTRL									B-KO									CTRL tg									B-KO tg
kappa	27.5		47.1	24.7	45.9					12.8	10.1	46.1	29.7	34.2	22.4	35.9	47.4	38.9	0	0	0	0	0.5					3.7	0.5	0.5		0	0.2	0.1	0	0
one way ANOVA
Uncorrected Fisher's LSD	Mean Diff,	95,00% CI of diff,	Below threshold?	Summary	Individual P Value
CTRL vs. B-KO	5.467	-6,021 to 16,95	No	ns	0.3344	A-B
CTRL vs. CTRL tg	36.2	23,38 to 49,02	Yes	****	<0,0001	A-C
CTRL vs. B-KO tg	35.68	23,97 to 47,38	Yes	****	<0,0001	A-D
B-KO vs. CTRL tg	30.73	20,07 to 41,40	Yes	****	<0,0001	B-C
B-KO vs. B-KO tg	30.21	20,92 to 39,50	Yes	****	<0,0001	B-D
CTRL tg vs. B-KO tg	-0.525	-11,42 to 10,37	No	ns	0.9213	C-D

## Sheet: Figure 7-figure supplement 1C
	CTRL									B-KO									CTRL tg									B-KO tg
lambda	7.2		11.9	4.1	8.6					1	0.5	2.6	2.8	1	1.4	0.8	2.9	1.4	14.3	40.4	10.9	23.4	12.1					2.8	3.4	1.9		1.4	1.9	3.6	5.3	2
one way ANOVA
Uncorrected Fisher's LSD	Mean Diff,	95,00% CI of diff,	Below threshold?	Summary	Individual P Value
CTRL vs. B-KO	6.35	-0,4493 to 13,15	No	ns	0.0657	A-B
CTRL vs. CTRL tg	-12.27	-19,86 to -4,680	Yes	**	0.0029	A-C
CTRL vs. B-KO tg	5.163	-1,766 to 12,09	No	ns	0.1366	A-D
B-KO vs. CTRL tg	-18.62	-24,93 to -12,31	Yes	****	<0,0001	B-C
B-KO vs. B-KO tg	-1.188	-6,685 to 4,310	No	ns	0.6586	B-D
CTRL tg vs. B-KO tg	17.43	10,98 to 23,88	Yes	****	<0,0001	C-D

## Sheet: Figure 7-figure supplement 1D
	CTRL									B-KO									CTRL tg									B-KO tg
LC-	57.4		32.5	63.5	38.2					31.2	33.6	19.4	37.5	58	62.3	57.1	37.5	51.7	71.6	47.5	82.1	64.5	71.6					77.5	75.9	88.2		91.9	23	67.9	74.6	27.7
one way ANOVA
Uncorrected Fisher's LSD	Mean Diff,	95,00% CI of diff,	Below threshold?	Summary	Individual P Value
CTRL vs. B-KO	4.756	-18,75 to 28,26	No	ns	0.6788	A-B
CTRL vs. CTRL tg	-19.56	-45,80 to 6,677	No	ns	0.1363	A-C
CTRL vs. B-KO tg	-17.94	-41,89 to 6,013	No	ns	0.1346	A-D
B-KO vs. CTRL tg	-24.32	-46,13 to -2,500	Yes	*	0.0306	B-C
B-KO vs. B-KO tg	-22.69	-41,70 to -3,688	Yes	*	0.0214	B-D
CTRL tg vs. B-KO tg	1.622	-20,67 to 23,92	No	ns	0.8814	C-D

## Sheet: Figure 7-figure supplement 1E
	CTRL									B-KO									CTRL tg									B-KO tg
B220					22.32		55.97	16.23	30.35	9.16	17	47.25	50.68	21.01	11.85	28.98	8.83	10.19					11.53	76.61	54.14	29.18	15.32	2.9	17.69	32.67	12.2	1.43	7.46	8.5	4.42	6.1
one way ANOVA
Uncorrected Fisher's LSD	Mean Diff,	95,00% CI of diff,	Below threshold?	Summary	Individual P Value
CTRL vs. B-KO	8.445	-12,97 to 29,86	No	ns	0.423	A-B
CTRL vs. CTRL tg	-6.139	-30,04 to 17,77	No	ns	0.6004	A-C
CTRL vs. B-KO tg	20.84	-0,5709 to 42,26	No	ns	0.0559	A-D
B-KO vs. CTRL tg	-14.58	-34,46 to 5,292	No	ns	0.1427	B-C
B-KO vs. B-KO tg	12.4	-4,401 to 29,20	No	ns	0.1405	B-D
CTRL tg vs. B-KO tg	26.98	7,105 to 46,86	Yes	**	0.01	C-D

## Sheet: Figure 7-figure supplement 1F
	CTRL									B-KO									CTRL tg									B-KO tg
kappa					54.43		24.3	42.74	52.45	65.09	47.69	92.87		69.31	46.96		51.57	48.44					0.12	0	0.02	0.02	0.14		1.9	2.58	5.57		0	0.04	0.07	0
one way ANOVA
Uncorrected Fisher's LSD	Mean Diff,	95,00% CI of diff,	Below threshold?	Summary	Individual P Value
CTRL vs. B-KO	-16.8	-31,27 to -2,318	Yes	*	0.0253	A-B
CTRL vs. CTRL tg	43.42	27,92 to 58,92	Yes	****	<0,0001	A-C
CTRL vs. B-KO tg	42.03	27,55 to 56,51	Yes	****	<0,0001	A-D
B-KO vs. CTRL tg	60.22	46,69 to 73,74	Yes	****	<0,0001	B-C
B-KO vs. B-KO tg	58.82	46,48 to 71,17	Yes	****	<0,0001	B-D
CTRL tg vs. B-KO tg	-1.391	-14,92 to 12,13	No	ns	0.8318	C-D

## Sheet: Figure 7-figure supplement 1G
	CTRL									B-KO									CTRL tg									B-KO tg
lambda					26.24		66.5	14.14	19.84	13.78	13.45	8.55		27.02	15.46		10.11	8.6					58.13	87.29	79.1	72.81	66.62		83.45	95.31	17.35		34.95	22.26	29.73	23.13
one way ANOVA
Uncorrected Fisher's LSD	Mean Diff,	95,00% CI of diff,	Below threshold?	Summary	Individual P Value
CTRL vs. B-KO	17.83	-9,971 to 45,63	No	ns	0.1953	A-B
CTRL vs. CTRL tg	-41.11	-70,86 to -11,36	Yes	**	0.0093	A-C
CTRL vs. B-KO tg	-12.06	-39,86 to 15,74	No	ns	0.3752	A-D
B-KO vs. CTRL tg	-58.94	-84,91 to -32,97	Yes	***	0.0001	B-C
B-KO vs. B-KO tg	-29.89	-53,59 to -6,181	Yes	*	0.0162	B-D
CTRL tg vs. B-KO tg	29.05	3,081 to 55,02	Yes	*	0.0303	C-D

## Sheet: Figure 7-figure supplement 1H
	CTRL									B-KO									CTRL tg									B-KO tg
LC-					30.9		22.47	44.56	32.54	32.94	51.05	6.09		25.83	48.7		42.76	47.32					38.66	10.41	17.93	23.14	30.47		13.1	3.33	78.48		62.32	73.57	68.5	75.7
one way ANOVA
Uncorrected Fisher's LSD	Mean Diff,	95,00% CI of diff,	Below threshold?	Summary	Individual P Value
CTRL vs. B-KO	-3.767	-31,13 to 23,60	No	ns	0.7764	A-B
CTRL vs. CTRL tg	8.496	-20,79 to 37,78	No	ns	0.551	A-C
CTRL vs. B-KO tg	-20.95	-48,32 to 6,411	No	ns	0.1255	A-D
B-KO vs. CTRL tg	12.26	-13,30 to 37,83	No	ns	0.328	B-C
B-KO vs. B-KO tg	-17.19	-40,52 to 6,150	No	ns	0.1397	B-D
CTRL tg vs. B-KO tg	-29.45	-55,01 to -3,885	Yes	*	0.0262	C-D
