# Supplementary material for: Kidins220 regulates the development of B cells bearing the λ light chain
Source: eLife. 2024 Jan 25;13:e83943. doi: 10.7554/eLife.83943 (PMC10810608; doi:10.7554/eLife.83943)
Supplement: Figure 7—source data 1. [file elife-83943-fig7-data1.xlsx]

## Sheet: Figure 7C
	CTRL					B-KO					CTRL tg					B-KO tg
B220	350895		77451	963746	251001	399414	288117	260602	151293	417392	65868	90484.7	452173		496049	432427	605100	1.12509e+06	349457	97852.6
one way ANOVA
Uncorrected Fisher's LSD	Mean Diff,	95,00% CI of diff,	Below threshold?	Summary	Individual P Value
CTRL vs. B-KO	107410	-320740 to 535559	No	ns	0.599	A-B
CTRL vs. CTRL tg	134630	-316679 to 585939	No	ns	0.5326	A-C
CTRL vs. B-KO tg	-111212	-539362 to 316937	No	ns	0.5862	A-D
B-KO vs. CTRL tg	27220	-400929 to 455369	No	ns	0.8935	B-C
B-KO vs. B-KO tg	-218622	-622285 to 185041	No	ns	0.2648	B-D
CTRL tg vs. B-KO tg	-245842	-673992 to 182307	No	ns	0.2384	C-D

## Sheet: Figure 7D
	CTRL					B-KO					CTRL tg					B-KO tg
kappa	96496.1		36479.4	238045	115210	136600	64538.2	93556.1	71712.9	162365	0	0	0	0	489.263	0	180.969	452.173	0	0
one way ANOVA
Uncorrected Fisher's LSD	Mean Diff,	95,00% CI of diff,	Below threshold?	Summary	Individual P Value
CTRL vs. B-KO	15803	-46673 to 78279	No	ns	0.5977	A-B
CTRL vs. CTRL tg	121460	58984 to 183936	Yes	***	0.0009	A-C
CTRL vs. B-KO tg	121431	58955 to 183907	Yes	***	0.0009	A-D
B-KO vs. CTRL tg	105657	46753 to 164560	Yes	**	0.0017	B-C
B-KO vs. B-KO tg	105628	46725 to 164531	Yes	**	0.0017	B-D
CTRL tg vs. B-KO tg	-28.78	-58932 to 58874	No	ns	0.9992	C-D

## Sheet: Figure 7E
	CTRL					B-KO					CTRL tg					B-KO tg
lambda	25264.4		9216.67	39513.6	21586.1	3994.14	4033.64	2084.82	4387.5	5843.48	61837	244460	122635	81773	11840.2	1844.31	3076.48	8591.28		6944.68
one way ANOVA
Uncorrected Fisher's LSD	Mean Diff,	95,00% CI of diff,	Below threshold?	Summary	Individual P Value
CTRL vs. B-KO	19826	-48251 to 87904	No	ns	0.5423	A-B
CTRL vs. CTRL tg	-80614	-148692 to -12536	Yes	*	0.0236	A-C
CTRL vs. B-KO tg	18781	-52979 to 90541	No	ns	0.5834	A-D
B-KO vs. CTRL tg	-100440	-164625 to -36256	Yes	**	0.0047	B-C
B-KO vs. B-KO tg	-1045	-69123 to 67032	No	ns	0.9742	B-D
CTRL tg vs. B-KO tg	99395	31317 to 167473	Yes	**	0.0074	C-D

## Sheet: Figure 7F
	CTRL					B-KO					CTRL tg					B-KO tg
LC-	201414		25171.6	611979	95882.5	231660	179497	148804	56734.9	215791	309618	287422	923701	225400	70062.5	51047.7	68677.9	398816		455869
one way ANOVA
Uncorrected Fisher's LSD	Mean Diff,	95,00% CI of diff,	Below threshold?	Summary	Individual P Value
CTRL vs. B-KO	67114	-274734 to 408962	No	ns	0.6801	A-B
CTRL vs. CTRL tg	-129629	-471477 to 212219	No	ns	0.4297	A-C
CTRL vs. B-KO tg	-9991	-370330 to 350348	No	ns	0.9534	A-D
B-KO vs. CTRL tg	-196743	-519040 to 125554	No	ns	0.2115	B-C
B-KO vs. B-KO tg	-77105	-418953 to 264743	No	ns	0.636	B-D
CTRL tg vs. B-KO tg	119638	-222210 to 461486	No	ns	0.4653	C-D

## Sheet: Figure 7H
	CTRL					B-KO					CTRL tg					B-KO tg
B220	2.3581e+06		738738	4.23101e+06	3.60188e+06	2.50529e+06	950803	318525	1.2685e+06	1.45608e+06	875958	1.41116e+07	2.53269e+06	1.43251e+06	355145	88416.5	125331	339533	281191	177971
one way ANOVA
Uncorrected Fisher's LSD	Mean Diff,	95,00% CI of diff,	Below threshold?	Summary	Individual P Value
CTRL vs. B-KO	1432591	-2992352 to 5857534	No	ns	0.5007	A-B
CTRL vs. CTRL tg	-1129149	-5554092 to 3295793	No	ns	0.5945	A-C
CTRL vs. B-KO tg	2529942	-1895001 to 6954884	No	ns	0.2418	A-D
B-KO vs. CTRL tg	-2561740	-6733616 to 1610136	No	ns	0.2103	B-C
B-KO vs. B-KO tg	1097351	-3074525 to 5269227	No	ns	0.5833	B-D
CTRL tg vs. B-KO tg	3659091	-512785 to 7830967	No	ns	0.0812	C-D

## Sheet: Figure 7I
	CTRL					B-KO					CTRL tg					B-KO tg
kappa	1.28351e+06		179513	1.80833e+06	1.88918e+06	1.73642e+06	446497	225388	654166	705324	1051.15	0	506.538	286.502	497.203		0	135.813	196.833	0
one way ANOVA
Uncorrected Fisher's LSD	Mean Diff,	95,00% CI of diff,	Below threshold?	Summary	Individual P Value
CTRL vs. B-KO	536578	-152613 to 1225769	No	ns	0.1171	A-B
CTRL vs. CTRL tg	1289668	600477 to 1978859	Yes	**	0.0013	A-C
CTRL vs. B-KO tg	1290053	563582 to 2016524	Yes	**	0.0019	A-D
B-KO vs. CTRL tg	753090	103314 to 1402866	Yes	*	0.0262	B-C
B-KO vs. B-KO tg	753475	64284 to 1442666	Yes	*	0.0343	B-D
CTRL tg vs. B-KO tg	385.1	-688806 to 689576	No	ns	0.9991	C-D

## Sheet: Figure 7J
	CTRL					B-KO					CTRL tg					B-KO tg
lambda	618765		491261	598265	714612	676929	146994	144196	128246	125223	509195	1.2318e+07	2.00336e+06	1.04301e+06	236598		43803.3	75580.1	83598	41164.7
one way ANOVA
Uncorrected Fisher's LSD	Mean Diff,	95,00% CI of diff,	Below threshold?	Summary	Individual P Value
CTRL vs. B-KO	361408	-3588250 to 4311067	No	ns	0.8472	A-B
CTRL vs. CTRL tg	-2616309	-6565967 to 1333350	No	ns	0.1773	A-C
CTRL vs. B-KO tg	544689	-3618617 to 4707995	No	ns	0.7831	A-D
B-KO vs. CTRL tg	-2977717	-6701491 to 746057	No	ns	0.1084	B-C
B-KO vs. B-KO tg	183281	-3766378 to 4132940	No	ns	0.9221	B-D
CTRL tg vs. B-KO tg	3160998	-788661 to 7110656	No	ns	0.1081	C-D

## Sheet: Figure 7K
	CTRL					B-KO					CTRL tg					B-KO tg
LC-	728652		165994	1.88534e+06	1.17205e+06	647116	463041	69502.2	542411	689016	338646	1.46902e+06	454111	331483	108213		78106.5	249795	192616	134724
one way ANOVA
Uncorrected Fisher's LSD	Mean Diff,	95,00% CI of diff,	Below threshold?	Summary	Individual P Value
CTRL vs. B-KO	505791	-158411 to 1169994	No	ns	0.1247	A-B
CTRL vs. CTRL tg	447715	-216488 to 1111918	No	ns	0.1703	A-C
CTRL vs. B-KO tg	824199	124067 to 1524330	Yes	*	0.0243	A-D
B-KO vs. CTRL tg	-58076	-684293 to 568140	No	ns	0.8452	B-C
B-KO vs. B-KO tg	318407	-345796 to 982610	No	ns	0.3213	B-D
CTRL tg vs. B-KO tg	376484	-287719 to 1040686	No	ns	0.2442	C-D

## Sheet: Figure 7L
ratio GFP+ vs GFP-in kappa compartment of transgenic and non-tramsgenice mice (graph representation)																						ratio GFP+ vs GFP-in lambda compartment of transgenic and non-tramsgenice mice (graph representation)
	GFP-									GFP+													GFP-									GFP+
CTRL TG-					94.2		98.7	82.3	92.3					5.8		1.3	17.7	7.7				CTRL TG-					91.8		97.4	83.9	91					8.2		2.6	16.1	9
B-KO TG-	87.5	88.8	74.6	56.4	76.2	92.1	85.2	95.3	87.8	12.5	11.2	25.4	43.6	23.8	7.9	14.8	4.7	12.2				B-KO TG-	48.6	55.1	35.7	9.9	59.7	72.4	72.1	78.4	77.1	51.4	44.9	64.3	90.1	40.3	27.6	27.9	21.6	22.9
																						CTRL TG+					77.9	38.6	60.3	74.3						22.1	61.4	39.7	25.7
																						B-KO TG+	41.2	37.3	8.4	31.8	89.8	88.3	49.2		78.1	58.8	62.7	91.6	68.2	10.2	11.7	50.8		21.9
Igk: statistics: comparing GFP+ between CTRL and B-KO (--> CD45.1 WT)
TG- CTRL (GFP+)	TG- B-KO (GFP+)																					Igl: statistics: comparing GFP+ between CTRL and B-KO (--> CD45.1 WT and -->CD45.1 k-macroself)
5.8	12.5
	11.2																					TG- CTRL (GFP+)	TG- B-KO (GFP+)	TG+ CTRL (GFP+)	TG+ B-KO (GFP+)
1.3	25.4																					8.2	51.4	22.1	58.8
17.7	43.6																						44.9	61.4	62.7
7.7	23.8																					2.6	64.3	39.7	91.6
	7.9																					16.1	90.1	25.7	68.2
	14.8																					9	40.3		10.2
	4.7																						27.6		11.7
	12.2																						27.9		50.8
																							21.6
one way ANOVA																							22.9		21.9
Uncorrected Fisher's LSD	Mean Diff,	95,00% CI of diff,	Below threshold?	Summary	Individual P Value																	one way ANOVA
TG- CTRL (GFP+) vs. TG- B-KO (GFP+)	-9.219	-48,65 to 30,21	No	ns	0.6332	A-B
																						Uncorrected Fisher's LSD	Mean Diff,	95,00% CI of diff,	Below threshold?	Summary	Individual P Value
																						TG- CTRL (GFP+) vs. TG- B-KO (GFP+)	-34.47	-63,32 to -5,619	Yes	*	0.0215	A-B
																						TG+ CTRL (GFP+) vs. TG+ B-KO (GFP+)	-9.763	-39,16 to 19,64	No	ns	0.4974	C-D

## Sheet: Figure 7M
ratio GFP+ vs GFP-in kappa compartment of transgenic and non-tramsgenice mice (graph representation)																						ratio GFP+ vs GFP-in lambda compartment of transgenic and non-tramsgenice mice (graph representation)
	GFP-									GFP+													GFP-									GFP+
CTRL TG-					98.12		99.55	96.89	96.5					1.88		0.45	3.11	3.5				CTRL TG-					93.21		92.64	91.52	88.12					6.79		7.36	8.48	11.88
B-KO TG-	97.78	99.27	72.14	61.45	96.9	99.03		97.83	98.13	2.22	0.73	27.86	38.55	3.1	0.97		2.17	1.87				B-KO TG-	95.05	97.72	62.44		74.83	82.43		82.09	81.94	4.95	2.28	37.56		25.17	17.57		17.91	18.06
																						CTRL TG+					91.52	37.97	81.87	87.24	97.33					8.48	62.03	18.13	12.76	2.67
																						B-KO TG+		45.19	4.32	83.78		94.09	90.75	91.39	92.42		54.81	95.68	16.22		5.91	9.25	8.61	7.58
Igk: statistics: comparing GFP+ between CTRL and B-KO (--> CD45.1 WT)
TG- CTRL (GFP+)	TG- B-KO (GFP+)																					Igl: statistics: comparing GFP+ between CTRL and B-KO (--> CD45.1 WT and -->CD45.1 k-macroself)
	2.22
	0.73																					TG- CTRL (GFP+)	TG- B-KO (GFP+)	TG+ CTRL (GFP+)	TG+ B-KO (GFP+)
	27.86																					6.79	4.95	8.48
	38.55																						2.28	62.03	54.81
1.88	3.1																					7.36	37.56	18.13	95.68
	0.97																					8.48		12.76	16.22
0.45																						11.88	25.17	2.67
3.11	2.17																						17.57		5.91
3.5	1.87																								9.25
																							17.91		8.61
one way ANOVA																							18.06		7.58
Uncorrected Fisher's LSD	Mean Diff,	95,00% CI of diff,	Below threshold?	Summary	Individual P Value																	one way ANOVA
TG- CTRL (GFP+) vs. TG- B-KO (GFP+)	-7.449	-39,53 to 24,63	No	ns	0.6342	A-B
																						Uncorrected Fisher's LSD	Mean Diff,	95,00% CI of diff,	Below threshold?	Summary	Individual P Value
																						TG- CTRL (GFP+) vs. TG- B-KO (GFP+)	-9.015	-39,39 to 21,36	No	ns	0.5419	A-B
																						TG+ CTRL (GFP+) vs. TG+ B-KO (GFP+)	-7.48	-35,86 to 20,90	No	ns	0.5876	C-D
