# Supplementary material for: Kidins220 regulates the development of B cells bearing the λ light chain
Source: eLife. 2024 Jan 25;13:e83943. doi: 10.7554/eLife.83943 (PMC10810608; doi:10.7554/eLife.83943)
Supplement: Figure 8—figure supplement 1—source data 1. [file elife-83943-fig8-figsupp1-data1.xlsx]

## Sheet: Figure 8-figure supplement 1
BM
		CTRL						Kidins220 BKO
	pro B cells	1.00418	0.995816	1.0743	0.925698	0.990199	1.0098	1.02279		1.12723	0.82427	1.12636	0.935689
	large pre B cells	1.38355	1.27574	0.988756	0.893246	1.60221	1.57893	1.39777		1.18315	0.826771	1.91331	1.75377
	small pre B cells	0.94908	0.883976	0.850353	0.797359	1.17847	1.20257	1.15444		0.9716	0.748629	1.34815	1.29871
	immature	0.544431	0.560574	0.964594	0.98232	1.76895	1.73944	1.13456		0.783846	1.10124	2.0547	1.9269
	mature	0.581513	0.565643	0.968246	1.17771	1.49726	1.38287	0.819825		0.876811	1.29486	2.08298	1.91124
	kappa	0.54007	0.535628	0.955762	0.955223	1.6383	1.54864	0.923148		0.815258	1.15921	2.06865	1.95291
	lambda	0.811468	0.758331	0.903755		1.71474	1.70314	0.828171		0.852158	1.15284	2.13732	2.09918
2way ANOVA
Uncorrected Fisher's LSD	Predicted (LS) mean diff,	95,00% CI of diff,	Below threshold?	Summary	Individual P Value
CTRL - Kidins220 BKO
pro B cells	-0.007267	-0,5336 to 0,5191	No	ns	0.9781
large pre B cells	-0.1279	-0,6542 to 0,3985	No	ns	0.6289
small pre B cells	-0.1273	-0,6537 to 0,3990	No	ns	0.6304
immature	-0.3069	-0,8332 to 0,2195	No	ns	0.2483
mature	-0.3683	-0,8946 to 0,1581	No	ns	0.1669
kappa	-0.3549	-0,8812 to 0,1715	No	ns	0.1826
lambda	-0.2356	-0,7854 to 0,3141	No	ns	0.3948
spleen
		CTRL						Kidins220 BKO
	non-B	1.01243	0.987571	1	1	1.03524	0.964757	0.904539		0.976592	0.818976	1.00483	1.138
	kappa	0.59444	0.517509	1.46567	1.3839	0.708927	0.761326	0.597584		1.38858	1.36049	0.906972	0.934886
	lambda	0.823517	0.785385	1.38858	1.36049	0.987874	1.03231	0.815668		1.58389	1.61142	1.11909	1.1058
2way ANOVA
Uncorrected Fisher's LSD	Predicted (LS) mean diff,	95,00% CI of diff,	Below threshold?	Summary	Individual P Value
CTRL - Kidins220 BKO
non-B	0.03141	-0,3201 to 0,3830	No	ns	0.8559
kappa	-0.1324	-0,4839 to 0,2191	No	ns	0.4463
lambda	-0.1842	-0,5357 to 0,1674	No	ns	0.292
