# Supplementary material for: Kidins220 regulates the development of B cells bearing the λ light chain
Source: eLife. 2024 Jan 25;13:e83943. doi: 10.7554/eLife.83943 (PMC10810608; doi:10.7554/eLife.83943)
Supplement: Figure 8—source data 1. [file elife-83943-fig8-data1.xlsx]

## Sheet: Figure 8A
CD25 %				CD25 MFI				MHCII				CD43
CTRL	B-KO			CTRL	B-KO			CTRL	B-KO			CTRL	B-KO
28.29	19.64			5340.74	4727.11			65.42	55.69			21.93	36.62
24.81	26.17			7931.64	7851.39			67.58	52.25			31.67	47.57
26.48				5183.65	5093.22				62.72				39.71
14.35	26.43			7792.43	5827.15			69.4	64			24.5	25.8
29.6	20.93			4449.52	2668.2			66.2	58.3			27.6	33.8
46.62	31.21			4879.6	3916.29			64.7	57.3			25.6	29.8
40.66	30.83			8431.08	9022.58
38.82				10786.4	9461.16
42.78	20.71
49.73	32.67			2765.67	2499.67
55.4	39.43
57.31	25.25
19.48	22.5
46.12	27.3
50.9	34.5
46.4	40
47.1	33.5
Unpaired t-test				paired t-test				Unpaired t-test				Unpaired t-test
Unpaired t test				Paired t test				Unpaired t test				Unpaired t test
P value	0.0086			P value	0.0351			P value	0.0036			P value	0.0356
P value summary	**			P value summary	*			P value summary	**			P value summary	*
Significantly different (P < 0.05)?	Yes			Significantly different (P < 0.05)?	Yes			Significantly different (P < 0.05)?	Yes			Significantly different (P < 0.05)?	Yes
One- or two-tailed P value?	Two-tailed			One- or two-tailed P value?	Two-tailed			One- or two-tailed P value?	Two-tailed			One- or two-tailed P value?	Two-tailed
t, df	t=2,811, df=30			t, df	t=2,532, df=8			t, df	t=3,907, df=9			t, df	t=2,469, df=9
				Number of pairs	9

## Sheet: Figure 8B
pSYK										pSLP65
		CTRL			B-KO							CTRL			B-KO
	precursor	1.94175	1.57282	1.41748	1.57282	1.0534	0.990291				precursor	1.28358	1.29104	2.15672	1.13806	1.22015	1.66418
	pro B cells	2.71845	2.13592	1.61165	2.19417	1.61165	1.56311				pro B cells	1.62585	2.13605	3.2585	1.64626	1.93197	2.61905
	pre B cells	2.7096	2.41798	1.90766	2.60024	2.04131	2.10207				pre B cells	1.6729	2.18692	3.47664	1.7757	2.14019	2.76635
	immature B cells	2.73608	2.48184	1.82809	2.79661	2.07022	2.2155				immature B cells	1.59459	2.18018	3.35135	1.81081	2.22523	3.01802
	mature B cells	2.75591	2.51968	2.036	2.57593	2.37345	2.27222				mature B cells	1.60714	2.1875	3.57143	1.74107	2.38393	2.97321
2way ANOVA										2way ANOVA
Uncorrected Fisher's LSD	Mean Diff,	95,00% CI of diff,	Below threshold?	Summary	Individual P Value					Uncorrected Fisher's LSD	Mean Diff,	95,00% CI of diff,	Below threshold?	Summary	Individual P Value
CTRL - B-KO										CTRL - B-KO
precursor	0.4385	-0,1963 to 1,073	No	ns	0.1651					precursor	0.2363	-0,9643 to 1,437	No	ns	0.6857
pro B cells	0.3657	-0,2691 to 1,000	No	ns	0.2435					pro B cells	0.2744	-0,9262 to 1,475	No	ns	0.6387
pre B cells	0.09721	-0,5376 to 0,7320	No	ns	0.7527					pre B cells	0.2181	-0,9825 to 1,419	No	ns	0.7088
immature B cells	-0.01211	-0,6469 to 0,6227	No	ns	0.9687					immature B cells	0.02402	-1,177 to 1,225	No	ns	0.9671
mature B cells	0.03	-0,6048 to 0,6648	No	ns	0.9225					mature B cells	0.08929	-1,111 to 1,290	No	ns	0.8783

## Sheet: Figure 8C
pp65										pIkB
		CTRL			B-KO							CTRL			B-KO
	precursor	2.93578	2.76147	2.55046	2.47706	2.51376					precursor	0.971631	1.21986	1.12057	1.00709	0.893617
	pro B cells	4.50091	4.79129	3.99274	4.04719	4.19238					pro B cells	1.10891	1.07921	1.15842	1.0396	1.13861
	pre B cells	3.82594	4.30213	3.53038	2.8243	3.6289					pre B cells	1.07837	1.01881	1.06426	1.16458	1.10815
	immature B cells	3.6965	4.10506	3.59922	3.5214	4.00778					immature B cells	1.00513	0.964066	1.0575	0.951745	1.10883
	mature B cells	2.74336	2.86136	2.68437	2.61062	3.11209					mature B cells	1	1.04587	1.0367	0.990826	1.07339
2way ANOVA											2way ANOVA
Uncorrected Fisher's LSD	Predicted (LS) mean diff,	95,00% CI of diff,	Below threshold?	Summary	Individual P Value						Uncorrected Fisher's LSD	Predicted (LS) mean diff,	95,00% CI of diff,	Below threshold?	Summary	Individual P Value
CTRL - B-KO											B-KO - CTRL
precursor	0.2538	-0,3498 to 0,8575	No	ns	0.3843						precursor	-0.1537	-0,2872 to -0,02018	Yes	*	0.0269
pro B cells	0.3085	-0,2951 to 0,9122	No	ns	0.2932						pro B cells	-0.0264	-0,1599 to 0,1071	No	ns	0.6793
pre B cells	0.6596	0,05591 to 1,263	Yes	*	0.0343						pre B cells	0.08255	-0,05094 to 0,2160	No	ns	0.2072
immature B cells	0.03567	-0,5680 to 0,6393	No	ns	0.9014						immature B cells	0.02139	-0,1121 to 0,1549	No	ns	0.7374
mature B cells	-0.09833	-0,7020 to 0,5053	No	ns	0.7333						mature B cells	0.004587	-0,1289 to 0,1381	No	ns	0.9426

## Sheet: Figure 8D
pERK
		CTRL (unstim)			B-KO (unstim)
	precursor	52.1	48.4	0	0	9.5
	pro B cells	26.4118	63.2353	42.9412	8.52941	20.5882
	pre B cells	192	640	668.571	77.7143	154.857
	immature B cells	186.842	668.421	719.737	51.7105	136.842
	mature B cells	91.875	167.5	84.375	68.125	63.125
2way ANOVA
Uncorrected Fisher's LSD	Predicted (LS) mean diff,	95,00% CI of diff,	Below threshold?	Summary	Individual P Value
CTRL (unstim) - B-KO (unstim)
precursor	28.75	-259,4 to 316,9	No	ns	0.8345
pro B cells	29.64	-258,5 to 317,8	No	ns	0.8294
pre B cells	383.9	95,72 to 672,1	Yes	*	0.0124
immature B cells	430.7	142,5 to 718,9	Yes	**	0.0061
mature B cells	48.96	-239,2 to 337,1	No	ns	0.7223

## Sheet: Figure 8E
BM
		pro B cells							large pre B cells							small pre B cells							Igκ							Igλ							immature							mature
	CTRL	1.022	0.978004	1.09753	0.902474	0.930729	1.06927		0.820651	0.74393	0.726035	0.592605	0.712803	0.85812		0.534826	0.503216	0.469951	0.402197	0.360303	0.432554		0.509304	0.538949	0.432581	0.380996	0.335583	0.391204		0.435414	0.491707	0.402197	0.319408	0.272706	0.326391		0.448439	0.496816	0.406584	0.346549	0.314682	0.373969		0.527221	0.598428	0.446999	0.395723	0.332192	0.403304
	B-KO	0.68087		0.84003	0.716491	0.790928	0.801705		0.629996		0.632546	0.548728	0.754559	0.799734		0.236048		0.227722	0.177019	0.0656029	0.0751137		0.212662		0.152742	0.102451	0.0862947	0.0813373		0.106379		0.0979025	0.0828533	0.0307379	0.0362236		0.144554		0.130096	0.082941	0.0397543	0.0439312		0.374096		0.218658	0.167358	0.147307	0.172122
2way ANOVA
Uncorrected Fisher's LSD	Predicted (LS) mean diff,	95,00% CI of diff,	Below threshold?	Summary	Individual P Value
CTRL - B-KO
pro B cells	0.234	0,1407 to 0,3273	Yes	****	<0,0001
large pre B cells	0.06924	-0,02401 to 0,1625	No	ns	0.1429
small pre B cells	0.2942	0,2009 to 0,3875	Yes	****	<0,0001
Igκ	0.3043	0,2111 to 0,3976	Yes	****	<0,0001
Igλ	0.3038	0,2106 to 0,3971	Yes	****	<0,0001
immature	0.3096	0,2163 to 0,4028	Yes	****	<0,0001
mature	0.2347	0,1415 to 0,3280	Yes	****	<0,0001
spleen
		non-B cells							Igκ							Igλ
	CTRL	0.954695	1.0453	0.502156	1.49784	1.02352	0.976475		0.40777	0.431529	0.220968	0.641168	0.460948	0.385663		0.318752	0.347986	0.220268	0.434144	0.380075	0.312663
	B-KO	0.984016		1.28624	1.31751	1.03431	1.08048		0.375299		0.379759	0.484551	0.246656	0.226246		0.359695		0.28968	0.481282	0.154614	0.163771
2way ANOVA
Uncorrected Fisher's LSD	Predicted (LS) mean diff,	95,00% CI of diff,	Below threshold?	Summary	Individual P Value
CTRL - B-KO
non-B cells	-0.1405	-0,3585 to 0,07751	No	ns	0.1971
Igκ	0.08217	-0,1358 to 0,3002	No	ns	0.446
Igλ	0.04584	-0,1722 to 0,2639	No	ns	0.6696
