# Supplementary material for: Kidins220 regulates the development of B cells bearing the λ light chain
Source: eLife. 2024 Jan 25;13:e83943. doi: 10.7554/eLife.83943 (PMC10810608; doi:10.7554/eLife.83943)
Supplement: Figure 9—source data 1. [file elife-83943-fig9-data1.xlsx]

## Sheet: Figure 9
Igk								Igl
	CTRL (BTK-)	CTRL (BTK+)	B-KO (BTK-)	B-KO (BTK+)					CTRL (BTK-)	CTRL (BTK+)	B-KO (BTK-)	B-KO (BTK+)
	8.66	15.8	11.7	17.6					0.56	4.12	0.25	1.33
	8.12	14.5	11.7	15.4					0.62	2.51	0.23	0.65
